# Supplementary material for: Single-cell sequencing of primate preimplantation embryos reveals chromosome elimination via cellular fragmentation and blastomere exclusion
Source: HighWire-hosted journal article supplement (doi:10.1101/gr.239830.118), 2019-01-25
Supplement: Supplemental_Tables.xlsx [file Supplemental_Tables.xlsx]

## Sheet: Supplemental_Table_S1
Sample Name	Sample Type	Embryo Stage	Single or Paired End	Sequencing Kit	mtDNA Read Counts	ChrY Counts	Raw Reads	Read Length	% GC	Reads Post Trimming	% Trimmed	Post Trim Lengths	% GC Post Trimming	Trimmed & Deduplicated	% Unique	Mapped	Passed Q30	Unique Mapping Positions	% Mapped	% Passed Q30	Non-Redundant Fraction)	% Unique/Raw
Embryo 1.B1	blastomere	3-cell embryo	PE	MiSeq 150x2 Cycles	511011	2253	1743374	100	45	1616090	0.0730102	36-100	45	1613386	0.998327	1599342	1440139	829938	0.991295	0.892619	0.518925	0.476053
Embryo 1.B2	blastomere	3-cell embryo	PE	MiSeq 150x2 Cycles	390239	7476	4444190	100	45	4175494	0.0604601	36-100	45	4172008	0.999165	4136679	3826727	2945587	0.991532	0.917239	0.712066	0.662795
Embryo 1.B3	blastomere	3-cell embryo	PE	MiSeq 150x2 Cycles	349669	3145	1974828	100	45	1835166	0.0707211	36-100	45	1833678	0.999189	1812716	1654482	1156233	0.988568	0.902275	0.637846	0.585485
Embryo 1.F1	empty cell. frag.	3-cell embryo	PE	MiSeq 150x2 Cycles	89422	7	133934	100	46	119152	0.110368	36-100	46	119018	0.998875	113701	96060	8510	0.955326	0.807105	0.0748454	0.0635388
Embryo 1.F2	empty cell. frag.	3-cell embryo	PE	MiSeq 150x2 Cycles	27015	1	47314	100	47	40990	0.13366	36-100	47	40948	0.998975	36651	30953	5245	0.895062	0.75591	0.143107	0.110855
Embryo 2.B1	No WGA	6 to 7-cell embryo	PE	MiSeq 150x2 Cycles	33	0	352	100	46	212	0.397727	41-100	46	212	1	210	199	185	0.990566	0.938679	0.880952	0.525568
Embryo 2.B2	blastomere	6 to 7-cell embryo	PE	MiSeq 150x2 Cycles	400020	1296	4774340	100	46	4406894	0.0769627	36-100	45	4403974	0.999337	4359692	4025049	3107059	0.989945	0.913958	0.712679	0.650783
Embryo 2.B3	blastomere	6 to 7-cell embryo	PE	MiSeq 150x2 Cycles	483804	284	1606956	100	46	1507764	0.0617266	36-100	45	1504316	0.997713	1492896	1341593	764116	0.992409	0.891829	0.511835	0.475505
Embryo 2.B4	blastomere	6 to 7-cell embryo	PE	MiSeq 150x2 Cycles	692402	846	3850496	100	46	3634900	0.0559917	36-100	46	3629526	0.998522	3591168	3282173	2229326	0.989432	0.904298	0.62078	0.578971
Embryo 2.B5	blastomere	6 to 7-cell embryo	PE	MiSeq 150x2 Cycles	206214	1445	737110	100	45	696752	0.0547517	36-100	45	695712	0.998507	688801	622547	376996	0.990066	0.894834	0.547322	0.511451
Embryo 2.B6	blastomere	6 to 7-cell embryo	PE	MiSeq 150x2 Cycles	834870	1365	5113698	100	46	4779260	0.0654004	36-100	45	4774306	0.998963	4737518	4331489	3001451	0.992295	0.90725	0.633549	0.586943
Embryo 2.F1	empty cell. frag.	6 to 7-cell embryo	PE	MiSeq 150x2 Cycles	29974	3	54470	100	46	49716	0.0872774	36-100	46	49666	0.998994	46505	39721	10901	0.936355	0.799762	0.234405	0.200129
Embryo 2.PB1	polar body	6 to 7-cell embryo	PE	MiSeq 150x2 Cycles	70685	343	1079192	100	46	1021488	0.0534696	36-100	45	1020822	0.999348	999160	927327	760549	0.97878	0.908412	0.761188	0.704739
Embryo 3.B1	blastomere	2-cell embryo	PE	MiSeq 150x2 Cycles	1005226	494	1486922	100	46	1360656	0.0849177	36-100	46	1356168	0.996702	1324184	1135451	107485	0.976416	0.83725	0.0811707	0.0722869
Embryo 3.B2	blastomere	2-cell embryo	PE	MiSeq 150x2 Cycles	641987	2690	1745794	100	45	1656966	0.0508811	36-100	45	1650944	0.996366	1637419	1456775	716749	0.991808	0.882389	0.437731	0.410558
Embryo 3.B3	blastomere	2-cell embryo	PE	MiSeq 150x2 Cycles	55994	1538	1011680	100	45	937342	0.0735	36-100	45	935834	0.998391	925555	660957	594362	0.989016	0.71412	0.642168	0.92503
Embryo 3.PB1	polar body	2-cell embryo	PE	MiSeq 150x2 Cycles	74522	1900	901230	100	45	844570	0.0628696	36-100	45	843932	0.999245	811016	755476	613486	0.960997	0.895186	0.756441	0.680721
Embryo 4.B1	blastomere	7-cell embryo	SE	NextSeq 75 Cycles	8036	301	2261294	57	42	2181794	0.0351569	36-57	42	1896666	0.869315	859914	788257	705989	0.453382	0.415601	0.821	0.312206
Embryo 4.B2	blastomere	7-cell embryo	SE	NextSeq 75 Cycles	31056	3634	2268415	57	42	2187447	0.0356936	36-57	41	1689230	0.772238	800655	709689	615621	0.473976	0.420126	0.768897	0.271388
Embryo 4.B3	blastomere	7-cell embryo	SE	NextSeq 75 Cycles	36498	3427	2649293	57	42	2555060	0.0355691	36-57	42	1944876	0.761186	930114	812773	704532	0.478238	0.417905	0.757468	0.265932
Embryo 4.B4	blastomere	7-cell embryo	SE	NextSeq 75 Cycles	14328	2682	2063077	57	42	1999117	0.0310022	36-57	42	1713630	0.857193	792349	715998	645463	0.46238	0.417825	0.81462	0.312864
Embryo 4.B5	empty blastomere	7-cell embryo	SE	NextSeq 75 Cycles	67987	3	1193649	57	43	1107578	0.0721075	36-57	42	209701	0.189333	188407	79977	6750	0.898455	0.381386	0.0358267	0.00565493
Embryo 4.B6	blastomere	7-cell embryo	SE	NextSeq 75 Cycles	33424	154	1891097	57	43	1812695	0.0414585	36-57	42	1315686	0.725818	651276	555365	471294	0.495009	0.422111	0.723647	0.249217
Embryo 4.B7	blastomere	7-cell embryo	SE	NextSeq 75 Cycles	15088	1864	1995823	57	42	1934277	0.0308374	36-57	42	1632379	0.843922	755324	680056	608760	0.462714	0.416604	0.805959	0.305017
Embryo 5.B1	blastomere	4-cell embryo	SE	NextSeq 75 Cycles	8077	191	1656104	57	41	1597536	0.0353649	36-57	41	1346098	0.842609	616329	547506	503106	0.457863	0.406736	0.816295	0.303789
Embryo 5.B2	blastomere	4-cell embryo	SE	NextSeq 75 Cycles	2426	201	1551702	57	41	1504884	0.030172	36-57	41	1367097	0.90844	612357	561774	523965	0.447925	0.410925	0.855653	0.337671
Embryo 5.B3	blastomere	4-cell embryo	SE	NextSeq 75 Cycles	4671	230	1757766	57	41	1704405	0.0303573	36-57	41	1510012	0.885947	680727	616960	571358	0.450809	0.40858	0.839335	0.325048
Embryo 5.B4	blastomere	4-cell embryo	SE	NextSeq 75 Cycles	4070	205	1715536	57	41	1664069	0.0300005	36-57	41	1489816	0.895285	668966	610089	567216	0.449026	0.409506	0.8479	0.330635
Embryo 5.F1	empty cell. frag.	4-cell embryo	SE	NextSeq 75 Cycles	224	0	8181	57	45	5570	0.319154	36-57	41	4498	0.80754	2092	1157	1004	0.465096	0.257225	0.479924	0.122723
Embryo 5.F2	empty cell. frag.	4-cell embryo	SE	NextSeq 75 Cycles	147	0	6588	57	44	4546	0.309957	36-57	42	3960	0.871095	1604	1048	953	0.405051	0.264646	0.59414	0.144657
Embryo 5.F3	empty cell. frag.	4-cell embryo	SE	NextSeq 75 Cycles	961	1	36524	57	44	25933	0.289974	36-57	41	15593	0.60128	7607	3788	2350	0.487847	0.24293	0.308926	0.0643413
Embryo 5.PB1	polar body	4-cell embryo	SE	NextSeq 75 Cycles	652	65	547715	57	41	527957	0.0360735	36-57	41	495810	0.939111	217840	199958	190040	0.439362	0.403296	0.872383	0.346969
Embryo 6.B1	No WGA	5-cell embryo	PE	MiSeq 150x2 Cycles	25272		76248	150	45	51864	0.319799	36-150	44	51618	0.995257	49817	40476	16650	0.965109	0.784145	0.334223	0.218366
Embryo 6.B2	blastomere	5-cell embryo	PE	MiSeq 150x2 Cycles	286353		5399660	150	44	4125306	0.236006	36-150	43	4106894	0.995537	4077324	3805415	3239117	0.9928	0.926592	0.794422	0.599874
Embryo 6.B3	blastomere	5-cell embryo	PE	MiSeq 150x2 Cycles	490211		3101370	150	44	2332568	0.247891	36-150	44	2320342	0.994759	2299291	2110858	1437789	0.990928	0.909718	0.625318	0.463598
Embryo 6.B4	blastomere	5-cell embryo	PE	MiSeq 150x2 Cycles	199025		5472578	150	44	4179574	0.23627	36-150	43	4160200	0.995365	4129329	3876832	3390890	0.992579	0.931886	0.821172	0.619615
Embryo 6.B5	blastomere	5-cell embryo	PE	MiSeq 150x2 Cycles	637096		5392874	150	44	4063342	0.246535	36-150	43	4044222	0.995295	4015813	3708523	2800123	0.992975	0.916993	0.697274	0.519226
Embryo 6.PB1	polar body	5-cell embryo	PE	MiSeq 150x2 Cycles	3977		5169896	150	44	4018888	0.222637	36-150	43	3999984	0.995296	3967581	3743694	3421175	0.991899	0.935927	0.862282	0.661749
Embryo 6.F2	empty cell. frag.	5-cell embryo	PE	MiSeq 150x2 Cycles	1556		47474	150	47	29074	0.387581	36-150	45	28940	0.995391	27096	21275	18149	0.936282	0.735142	0.669804	0.382293
Embryo 7.B1	blastomere	4-cell embryo	SE	NextSeq 75 Cycles	14106	3161	2214527	57	41	2139667	0.0338041	36-57	41	1650564	0.771412	784795	696964	611339	0.475471	0.422258	0.778979	0.276058
Embryo 7.B2	blastomere	4-cell embryo	SE	NextSeq 75 Cycles	11605	2833	2224380	57	42	2144634	0.0358509	36-57	42	1715757	0.800023	690677	618071	546265	0.402549	0.360232	0.790912	0.245581
Embryo 7.B3	blastomere	4-cell embryo	SE	NextSeq 75 Cycles	15688	1708	1586827	57	41	1525669	0.0385411	36-57	41	1031100	0.675835	494268	422918	357435	0.47936	0.410162	0.72316	0.225251
Embryo 7.B4	blastomere	4-cell embryo	SE	NextSeq 75 Cycles	8447	3102	1866777	57	42	1801784	0.0348156	36-57	41	1505040	0.835305	700131	631842	569016	0.465191	0.419817	0.812728	0.304812
Embryo 7.PB1	polar body	4-cell embryo	SE	NextSeq 75 Cycles	306	122	1039935	57	42	1005425	0.0331848	36-57	41	909089	0.904184	406877	379746	349081	0.447566	0.417721	0.857952	0.335676
Embryo 7.PB2	polar body	4-cell embryo	SE	NextSeq 75 Cycles	244	150	1219362	57	42	1181001	0.0314599	36-57	41	1087179	0.920557	487022	456190	423031	0.447969	0.419609	0.868608	0.346928
Embryo 7.F3	empty cell. frag.	4-cell embryo	SE	NextSeq 75 Cycles	1108	2	28221	57	43	22196	0.213493	36-57	42	12647	0.569787	7151	3518	1760	0.565431	0.278169	0.246119	0.0623649
Embryo 8.B1	blastomere	3-cell embryo	SE	NextSeq 75 Cycles	1036	141	1241996	57	42	1212423	0.0238109	36-57	42	1072050	0.884221	498146	465798	420681	0.464667	0.434493	0.844493	0.338714
Embryo 8.B2	empty blastomere	3-cell embryo	SE	NextSeq 75 Cycles	713	1	61061	57	44	55719	0.0874863	36-57	44	46021	0.825948	11529	8469	7112	0.250516	0.184025	0.616879	0.116474
Embryo 8.B3	empty blastomere	3-cell embryo	SE	NextSeq 75 Cycles	342	1	9301	57	43	8151	0.123643	36-57	42	5382	0.660287	2827	1606	1167	0.525269	0.298402	0.412805	0.12547
Embryo 8.F1	chromosome(s) in fragment	3-cell embryo	PE	NextSeq 75x2 Cycles	13907	16	333586	60	42	305796	0.0908776	36-60	42	221048	0.722861	183096	67850	25190	0.828309	0.306947	0.137578	0.0755128
Embryo 8.F1	chromosome(s) in fragment	3-cell embryo	SE	NextSeq 75 Cycles	7879	15	252928	57	41	231978	0.0828299	36-57	41	76449	0.329553	51288	25462	11223	0.670879	0.333059	0.218823	0.0443723
Embryo 8.F2	empty cell. frag.	3-cell embryo	SE	NextSeq 75 Cycles	146	1	3653	57	43	3079	0.157131	36-57	43	2223	0.721988	1015	562	424	0.45659	0.252812	0.417734	0.116069
Embryo 8.F3	empty cell. frag.	3-cell embryo	SE	NextSeq 75 Cycles	555	1	37042	57	44	31080	0.160952	36-57	43	25206	0.811004	9174	6891	5958	0.363961	0.273387	0.649444	0.160844
Embryo 9.B1	empty blastomere	5-cell embryo	SE	NextSeq 75 Cycles	18174	11	610005	57	41	539088	0.116256	36-57	40	150442	0.279068	99033	45924	14427	0.65828	0.30526	0.145679	0.0236506
Embryo 9.B2	empty blastomere	5-cell embryo	SE	NextSeq 75 Cycles	24222	8	877073	57	41	802014	0.085579	36-57	40	185501	0.231294	124209	53088	9682	0.669587	0.286187	0.0779493	0.011039
Embryo 9.B3	No WGA	5-cell embryo	SE	NextSeq 75 Cycles	956	1	61258	57	46	40358	0.34118	36-57	44	28594	0.708509	9613	5964	4195	0.336189	0.208575	0.436388	0.0684809
Embryo 9.B4	blastomere	5-cell embryo	SE	NextSeq 75 Cycles	8447	2063	2212107	57	41	2139081	0.033012	36-57	41	1813008	0.847564	840979	765943	690677	0.463858	0.422471	0.821277	0.312226
Embryo 9.B5	empty blastomere	5-cell embryo	SE	NextSeq 75 Cycles	2464	0	61836	57	42	55466	0.103014	36-57	40	18764	0.338297	13397	5690	1215	0.713974	0.30324	0.0906919	0.0196487
Embryo 9.PB1	polar body	5-cell embryo	SE	NextSeq 75 Cycles	385	51	539769	57	42	525268	0.0268652	36-57	42	487324	0.927763	224651	208925	196342	0.460989	0.428719	0.873987	0.363752
Embryo 9.F2	No WGA	5-cell embryo	SE	NextSeq 75 Cycles	305	1	11850	57	42	10751	0.0927426	36-57	41	9310	0.865966	4232	3232	2937	0.454565	0.347154	0.693998	0.247848
Embryo 9.F3	No WGA	5-cell embryo	SE	NextSeq 75 Cycles	54	1	2559	57	47	1761	0.311841	36-57	45	1515	0.860307	532	328	296	0.351155	0.216502	0.556391	0.11567
Embryo 9.F4	No WGA	5-cell embryo	SE	NextSeq 75 Cycles	115	0	3575	57	46	2364	0.338741	36-57	44	1838	0.777496	750	394	307	0.408052	0.214363	0.409333	0.0858741
Embryo 9.F5	empty cell. frag.	5-cell embryo	SE	NextSeq 75 Cycles	4702	5	122806	57	41	111884	0.088937	36-57	40	38955	0.348173	26053	12026	4460	0.668797	0.308715	0.171189	0.0363174
Embryo 9.F6	No WGA	5-cell embryo	SE	NextSeq 75 Cycles	304	0	8893	57	47	5679	0.361408	36-57	43	4114	0.724423	2051	1011	744	0.498542	0.245746	0.36275	0.0836613
Embryo 9.F7	No WGA	5-cell embryo	SE	NextSeq 75 Cycles	91	1	5039	57	47	2926	0.419329	36-57	45	2491	0.851333	854	500	429	0.342834	0.200723	0.502342	0.0851359
Embryo 10.B1	empty blastomere	3-cell embryo	SE	NextSeq 75 Cycles	130651	177	38339339	57	56	22366933	0.416606	36-57	57	6994612	0.312721	619063	311499	75772	0.0885057	0.0445341	0.122398	0.00197635
Embryo 10.B2	blastomere	3-cell embryo	SE	NextSeq 75 Cycles	5331	1269	1177148	57	42	1144275	0.027926	36-57	42	1026401	0.896988	465403	423892	393797	0.453432	0.412989	0.846142	0.334535
Embryo 10.B3	blastomere	3-cell embryo	SE	NextSeq 75 Cycles	4476	1483	1211121	57	42	1177830	0.0274878	36-57	42	1081086	0.917863	454373	412253	385236	0.420293	0.381332	0.847841	0.318082
Embryo 10.F1	empty cell. frag.	3-cell embryo	SE	NextSeq 75 Cycles	1637	1	44042	57	46	30025	0.318264	36-57	43	23045	0.767527	8755	5483	4374	0.379909	0.237926	0.4996	0.0993143
Embryo 10.F2	No WGA	3-cell embryo	SE	NextSeq 75 Cycles	173	18	55504	57	51	27113	0.511513	36-57	53	24452	0.901855	2632	2069	1991	0.107639	0.0846148	0.756459	0.0358713
Embryo 10.F3	No WGA	3-cell embryo	SE	NextSeq 75 Cycles	359	0	5729	57	46	4257	0.256938	36-57	45	2836	0.666197	1354	590	409	0.477433	0.208039	0.302068	0.0713912
Embryo 11.B1	blastomere	5 to 7-cell embryo	SE	NextSeq 75 Cycles	11917	179	1424318	57	42	1376554	0.0335346	36-57	41	1192756	0.86648	537272	476978	439046	0.450446	0.399896	0.817176	0.30825
Embryo 11.B2	empty blastomere	5 to 7-cell embryo	SE	NextSeq 75 Cycles	27385	35	11118193	57	49	4877493	0.561305	36-57	44	1593923	0.326791	282878	193655	41227	0.177473	0.121496	0.145741	0.00370807
Embryo 11.B5	blastomere	5 to 7-cell embryo	SE	NextSeq 75 Cycles	29133	538	10513207	57	46	9463212	0.0998739	36-57	45	4736325	0.500499	2178197	1912329	977807	0.459892	0.403758	0.448907	0.0930075
Embryo 11.B3	blastomere	5 to 7-cell embryo	SE	NextSeq 75 Cycles	3097	180	1452948	57	42	1396050	0.0391604	36-57	42	1289399	0.923605	568099	522392	488777	0.440592	0.405144	0.860373	0.336404
Embryo 11.B4	blastomere	5 to 7-cell embryo	SE	NextSeq 75 Cycles	8526	144	1205946	57	42	1154480	0.0426769	36-57	42	1021991	0.885239	462561	412915	383245	0.452608	0.40403	0.828529	0.317796
Embryo 11.F1	empty cell. frag.	5 to 7-cell embryo	SE	NextSeq 75 Cycles	2478	5	41138	57	45	30519	0.258131	36-57	43	16771	0.549527	9558	4609	2700	0.569912	0.27482	0.282486	0.0656327
Embryo 11.F2	empty cell. frag.	5 to 7-cell embryo	SE	NextSeq 75 Cycles	2266	3	94289	57	46	72881	0.227047	36-57	44	59096	0.810856	25867	19685	17436	0.437712	0.333102	0.674063	0.184921
Embryo 11.F3	No WGA	5 to 7-cell embryo	SE	NextSeq 75 Cycles	696	2	20229	57	44	17461	0.136833	36-57	42	14246	0.815875	6533	4834	4360	0.458585	0.339323	0.667381	0.215532
Embryo 11.F4	No WGA	5 to 7-cell embryo	SE	NextSeq 75 Cycles	270	0	6554	57	43	5861	0.105737	36-57	42	5212	0.889268	2447	1810	1682	0.469493	0.347276	0.687372	0.256637
Embryo 11.F6	No WGA	5 to 7-cell embryo	SE	NextSeq 75 Cycles	504	10	8562	57	42	7785	0.0907498	36-57	42	6170	0.79255	3414	2291	2047	0.553323	0.371313	0.59959	0.23908
Embryo 11.F5	No WGA	5 to 7-cell embryo	SE	NextSeq 75 Cycles	224	1	10088	57	42	9400	0.0681998	36-57	42	8888	0.945532	4204	3533	3418	0.472997	0.397502	0.813035	0.338818
Embryo 11.F7	empty cell. frag.	5 to 7-cell embryo	SE	NextSeq 75 Cycles	2605	6	58506	57	43	54545	0.0677025	36-57	42	36604	0.671079	19870	13692	11208	0.542837	0.374057	0.564066	0.19157
Embryo 11.F8	empty cell. frag.	5 to 7-cell embryo	SE	NextSeq 75 Cycles	6906	11	166310	57	43	153015	0.0799411	36-57	42	94003	0.614338	50935	34712	27617	0.541844	0.369265	0.542201	0.166057
Embryo 11.PB1	polar body	5 to 7-cell embryo	SE	NextSeq 75 Cycles	5909	60	505483	57	42	487047	0.036472	36-57	42	422875	0.868243	195882	169782	158193	0.463215	0.401495	0.807593	0.312954
Embryo 11.PB2	polar body	5 to 7-cell embryo	SE	NextSeq 75 Cycles	10069	92	944459	57	42	908675	0.0378884	36-57	42	770135	0.847536	352476	307096	282495	0.457681	0.398756	0.801459	0.299108
Embryo 12.B1	blastomere	6 to 9-cell embryo	PE	MiSeq 150x2 Cycles	1463230	7882	7638398	150	44	5666114	0.258206	36-150	43	5635248	0.994553	5586833	5253937	3367977	0.991409	0.932335	0.602842	0.440927
Embryo 12.B2	No WGA	6 to 9-cell embryo	PE	MiSeq 150x2 Cycles	30266	7	72740	150	47	44228	0.391971	36-150	44	43972	0.994212	43083	40390	13700	0.979783	0.918539	0.317991	0.188342
Embryo 12.B3	blastomere	6 to 9-cell embryo	PE	MiSeq 150x2 Cycles	466297	9154	6931006	150	43	5353498	0.227602	36-150	43	5326904	0.995032	5293229	5042565	4156491	0.993678	0.946622	0.785247	0.599695
Embryo 12.B4	blastomere	6 to 9-cell embryo	PE	MiSeq 150x2 Cycles	435878	38	6486522	150	44	4975512	0.232946	36-150	44	4951846	0.995244	4912236	4637583	3814104	0.992001	0.936536	0.77645	0.588004
Embryo 12.B5	empty blastomere	6 to 9-cell embryo	PE	MiSeq 150x2 Cycles	593569	6	1089264	150	45	736338	0.324004	36-150	43	731730	0.993742	727415	705963	84873	0.994103	0.964786	0.116678	0.0779177
Embryo 12.F1	empty cell. frag.	6 to 9-cell embryo	PE	MiSeq 150x2 Cycles	10973	199	34430	150	47	20712	0.398432	36-150	43	20600	0.994593	19881	18036	8875	0.965097	0.875534	0.446406	0.257769
Embryo 12.X2	unknown	6 to 9-cell embryo	PE	MiSeq 150x2 Cycles	1570	13455	666918	150	47	388918	0.416843	36-150	45	387030	0.995146	373422	285827	249648	0.96484	0.738514	0.668541	0.374331
Embryo 12.F4	empty cell. frag.	6 to 9-cell embryo	PE	MiSeq 150x2 Cycles	1720	6	25466	150	50	14128	0.445221	36-150	44	14070	0.995895	12952	10463	8629	0.92054	0.743639	0.666229	0.338844
Embryo 12.F5	empty cell. frag.	6 to 9-cell embryo	PE	MiSeq 150x2 Cycles	8290	17	46510	150	48	28424	0.388863	36-150	44	28286	0.995145	26851	22799	15036	0.949268	0.806017	0.559979	0.323285
Embryo 12.F6	empty cell. frag.	6 to 9-cell embryo	PE	MiSeq 150x2 Cycles	6689	6	37014	150	48	22522	0.391528	36-150	44	22380	0.993695	20776	17457	11454	0.928329	0.780027	0.551309	0.30945
Embryo 12.F7	empty cell. frag.	6 to 9-cell embryo	PE	MiSeq 150x2 Cycles	1769	12	26166	150	50	14760	0.435909	36-150	44	14684	0.994851	13350	10638	8630	0.909153	0.724462	0.646442	0.329817
Embryo 12.F8	empty cell. frag.	6 to 9-cell embryo	PE	MiSeq 150x2 Cycles	2270	5	24000	150	48	13582	0.434083	36-150	45	13518	0.995288	12051	9548	7168	0.891478	0.706318	0.594805	0.298667
Embryo 12.F9	empty cell. frag.	6 to 9-cell embryo	PE	MiSeq 150x2 Cycles	1374	27	96032	150	45	68604	0.285613	36-150	43	68258	0.994957	67111	62175	58334	0.983196	0.910882	0.869217	0.607443
Embryo 12.F10	empty cell. frag.	6 to 9-cell embryo	PE	MiSeq 150x2 Cycles	9350	13	37346	150	48	23258	0.377229	36-150	44	23152	0.995442	22167	19459	11212	0.957455	0.840489	0.505797	0.30022
Embryo 12.F11	empty cell. frag.	6 to 9-cell embryo	PE	MiSeq 150x2 Cycles	4803	4	33976	150	48	19066	0.438839	36-150	44	18980	0.995489	17918	14980	10628	0.944046	0.789252	0.593147	0.312809
Embryo 12.F3	empty cell. frag.	6 to 9-cell embryo	PE	MiSeq 150x2 Cycles	19143	5	51084	150	46	33636	0.341555	36-150	43	33468	0.995005	32556	29967	13214	0.97275	0.895393	0.405885	0.258672
Embryo 12.B6	blastomere	6 to 9-cell embryo	PE	MiSeq 150x2 Cycles	91242	3382	13416684	150	46	7661208	0.428979	36-150	45	7615718	0.994062	7411415	5765078	4294431	0.973174	0.756997	0.579435	0.320081
Embryo 12.F12	empty cell. frag.	6 to 9-cell embryo	PE	MiSeq 150x2 Cycles	4511	12	31286	150	54	13516	0.567986	36-150	44	13456	0.995561	12354	10515	6984	0.918103	0.781436	0.565323	0.223231
Embryo 12.B7	empty blastomere	6 to 9-cell embryo	PE	MiSeq 150x2 Cycles	104118	76	396292	150	46	254194	0.358569	36-150	43	252926	0.995012	237158	203699	91200	0.937658	0.80537	0.384554	0.230133
Embryo 12.F13	empty cell. frag.	6 to 9-cell embryo	PE	MiSeq 150x2 Cycles	52610	8	121974	150	46	82842	0.320822	36-150	43	82386	0.994496	80408	74261	23606	0.975991	0.901379	0.293578	0.193533
Embryo 13.B3	empty blastomere	9-cell embryo	SE	NextSeq 75 Cycles	7781	3	232152	55	42	225160	0.0301182	36-55	42	146418	0.650284	107528	60451	52282	0.734391	0.412866	0.486218	0.225206
Embryo 13.B4	empty blastomere	9-cell embryo	SE	NextSeq 75 Cycles	8416	11	261330	55	42	253411	0.0303027	36-55	42	169605	0.669288	123904	70492	61454	0.730545	0.415625	0.495981	0.235159
Embryo 13.B7B8	blastomere	9-cell embryo	SE	NextSeq 75 Cycles	33652	30	1067851	55	42	1031721	0.0338343	36-55	42	482886	0.468039	360292	199442	155067	0.746122	0.413021	0.430393	0.145214
Embryo 13.B1	blastomere	9-cell embryo	SE	NextSeq 75 Cycles	44374	387	5214634	55	41	5124420	0.0173002	36-55	41	3676703	0.717487	3446710	2860340	2508256	0.937446	0.777963	0.727725	0.481003
Embryo 13.B2	blastomere	9-cell embryo	SE	NextSeq 75 Cycles	28000	366	4579892	55	42	4508188	0.0156563	36-55	41	3503034	0.777038	3374801	2838200	2542506	0.963394	0.810212	0.75338	0.555145
Embryo 13.B5	blastomere	9-cell embryo	SE	NextSeq 75 Cycles	37519	396	5144755	55	41	5050374	0.0183451	36-55	41	3739534	0.740447	3541390	2929722	2559721	0.947014	0.783446	0.722801	0.49754
Embryo 13.B6	blastomere	9-cell embryo	SE	NextSeq 75 Cycles	26222	395	4860230	55	41	4779012	0.0167107	36-55	41	3757622	0.786276	3616325	3039170	2699714	0.962397	0.808801	0.746535	0.55547
Embryo 13.F1	empty cell. frag.	9-cell embryo	SE	NextSeq 75 Cycles	646	9	185996	55	43	180008	0.0321942	36-55	43	165655	0.920265	116668	71667	68909	0.704283	0.432628	0.590642	0.370486
Embryo 13.F10	empty cell. frag.	9-cell embryo	SE	NextSeq 75 Cycles	726	14	232459	55	43	223103	0.040248	36-55	43	204180	0.915183	146295	90929	86865	0.7165	0.445337	0.593766	0.373679
Embryo 13.X11	unknown	9-cell embryo	SE	NextSeq 75 Cycles	2424	36	727828	55	43	699884	0.0383937	36-55	43	590534	0.84376	422339	264235	240401	0.715182	0.447451	0.569213	0.330299
Embryo 13.F12	empty cell. frag.	9-cell embryo	SE	NextSeq 75 Cycles	1998	19	215022	55	43	206664	0.0388704	36-55	42	184971	0.895033	141615	95154	90587	0.765607	0.514427	0.639671	0.421292
Embryo 13.F2	empty cell. frag.	9-cell embryo	SE	NextSeq 75 Cycles	1187	4	173985	55	43	167881	0.0350835	36-55	43	152404	0.90781	107291	65174	62392	0.703991	0.42764	0.581521	0.358606
Embryo 13.F3	empty cell. frag.	9-cell embryo	SE	NextSeq 75 Cycles	1215	5	199469	55	43	192481	0.035033	36-55	43	173922	0.90358	117499	71523	68250	0.675584	0.411236	0.580856	0.342158
Embryo 13.F4	empty cell. frag.	9-cell embryo	SE	NextSeq 75 Cycles	1298	15	220085	55	43	207885	0.0554331	36-55	43	183739	0.883849	126422	78002	73109	0.688052	0.424526	0.578293	0.332185
Embryo 13.F5	empty cell. frag.	9-cell embryo	SE	NextSeq 75 Cycles	461	7	167331	55	43	160823	0.038893	36-55	43	149423	0.929115	105650	65248	62808	0.707053	0.436666	0.594491	0.375352
Embryo 13.F6	empty cell. frag.	9-cell embryo	SE	NextSeq 75 Cycles	854	7	192562	55	43	183556	0.0467694	36-55	43	167820	0.914271	116434	69964	66904	0.693803	0.416899	0.574609	0.347441
Embryo 13.F7	empty cell. frag.	9-cell embryo	SE	NextSeq 75 Cycles	692	13	217465	55	43	207529	0.0456901	36-55	43	189747	0.914316	132425	80497	76898	0.697903	0.424233	0.580691	0.353611
Embryo 13.F8	empty cell. frag.	9-cell embryo	SE	NextSeq 75 Cycles	576	3	188767	55	43	180072	0.0460621	36-55	43	165340	0.918188	114620	69399	66262	0.693238	0.419735	0.578102	0.351025
Embryo 13.F13	empty cell. frag.	9-cell embryo	SE	NextSeq 75 Cycles	1842	21	282521	55	43	273134	0.0332258	36-55	43	243775	0.892511	175514	108958	103421	0.719984	0.446961	0.589246	0.366065
Embryo 13.F9	chromosome(s) in fragment	9-cell embryo	SE	NextSeq 75 Cycles	9083	70	1262186	55	42	1228064	0.0270341	36-55	42	985530	0.802507	782343	580543	518847	0.79383	0.589067	0.663196	0.41107
Embryo 13.F9	chromosome(s) in fragment	9-cell embryo	PE	NextSeq 75x2 Cycles	13446	466	1457940	60	43	1320726	0.103893	36-60	43	1267424	0.959642	1053832	806104	636816	0.831475	0.636018	0.604286	0.436792
Embryo 14.B1	blastomere	7-cell embryo	PE	MiSeq 150x2 Cycles	426533	8192	5667982	150	44	4353296	0.23195	36-150	43	4334160	0.995604	4303483	4082109	3369061	0.992922	0.941845	0.782868	0.594402
Embryo 14.B2	blastomere	7-cell embryo	PE	MiSeq 150x2 Cycles	721253	7181	6261110	150	44	4780008	0.236556	36-150	43	4756340	0.995049	4721308	4480136	3420420	0.992635	0.941929	0.724464	0.546296
Embryo 14.B3	blastomere	7-cell embryo	PE	MiSeq 150x2 Cycles	565340	7273	5097148	150	44	3878772	0.239031	36-150	43	3860944	0.995404	3832681	3636476	2838669	0.99268	0.941862	0.740648	0.556913
Embryo 14.B4	blastomere	7-cell embryo	PE	MiSeq 150x2 Cycles	254519	6196	4327198	150	44	3327654	0.230991	36-150	43	3311752	0.995221	3285352	3097274	2622243	0.992028	0.935237	0.798162	0.605991
Embryo 14.B5	blastomere	7-cell embryo	PE	MiSeq 150x2 Cycles	712865	6269	5379076	150	44	4095664	0.238593	36-150	43	4073746	0.994648	4044512	3838143	2848441	0.992824	0.942166	0.704273	0.529541
Embryo 14.B6	blastomere	7-cell embryo	PE	MiSeq 150x2 Cycles	943666	6554	5993886	150	44	4432626	0.260475	36-150	43	4410620	0.995035	4374939	4127447	2867631	0.99191	0.935797	0.655468	0.478426
Embryo 14.B7	blastomere	7-cell embryo	PE	MiSeq 150x2 Cycles	579440	5913	4868762	150	44	3655114	0.249272	36-150	43	3635810	0.994719	3583261	3367334	2529062	0.985547	0.926158	0.705799	0.519447
Embryo 14.F1	empty cell. frag.	7-cell embryo	PE	MiSeq 150x2 Cycles	734	17	20454	150	48	12002	0.41322	36-150	44	11946	0.995334	11211	8760	7602	0.938473	0.7333	0.678084	0.371663
Embryo 14.F2	empty cell. frag.	7-cell embryo	PE	MiSeq 150x2 Cycles	3058	12	27728	150	47	16910	0.390147	36-150	44	16828	0.995151	15904	13081	10218	0.945092	0.777335	0.64248	0.368508
Embryo 14.F3	empty cell. frag.	7-cell embryo	PE	MiSeq 150x2 Cycles	321	14	17668	150	48	9830	0.443627	36-150	44	9782	0.995117	9074	7157	6326	0.927622	0.73165	0.697157	0.358048
Embryo 14.F4	empty cell. frag.	7-cell embryo	PE	MiSeq 150x2 Cycles	35195	2	74970	150	45	49960	0.3336	36-150	43	49744	0.995677	48824	45785	13196	0.981505	0.920413	0.270277	0.176017
Embryo 15.B1	blastomere	6-cell embryo	PE	MiSeq 150x2 Cycles	195506	785	3617430	150	44	2815092	0.221798	36-150	43	2801586	0.995202	2776257	2610797	2227978	0.990959	0.9319	0.802511	0.615901
Embryo 15.B2	blastomere	6-cell embryo	PE	MiSeq 150x2 Cycles	540701	1186	5560692	150	44	4281012	0.23013	36-150	43	4260572	0.995225	4227401	4002204	3174463	0.992214	0.939358	0.750925	0.570876
Embryo 15.B3	blastomere	6-cell embryo	PE	MiSeq 150x2 Cycles	354364	790	3709304	150	44	2865738	0.227419	36-150	43	2852504	0.995382	2830349	2680225	2158758	0.992233	0.939604	0.762718	0.581985
Embryo 15.F1	empty cell. frag.	6-cell embryo	PE	MiSeq 150x2 Cycles	6300	7	34200	150	48	19884	0.418596	36-150	44	19784	0.994971	18787	16107	10661	0.949606	0.814143	0.567467	0.311725
Embryo 15.F2	empty cell. frag.	6-cell embryo	PE	MiSeq 150x2 Cycles	816	9	42776	150	46	25898	0.394567	36-150	44	25766	0.994903	23697	18445	16319	0.9197	0.715866	0.688653	0.381499
Embryo 15.F3	empty cell. frag.	6-cell embryo	PE	MiSeq 150x2 Cycles	5453	8	39134	150	47	23526	0.398835	36-150	44	23412	0.995154	21764	18063	12954	0.929609	0.771527	0.595203	0.331017
Embryo 15.PB1	polar body	6-cell embryo	PE	MiSeq 150x2 Cycles	4951	1070	4276156	150	44	3327638	0.221816	36-150	43	3311518	0.995156	3281927	3083210	2836947	0.991064	0.931056	0.864415	0.663434
Embryo 15.F5	empty cell. frag.	6-cell embryo	PE	MiSeq 150x2 Cycles	2091	17	46412	150	46	29540	0.363527	36-150	44	29388	0.994854	27128	21492	18411	0.923098	0.731319	0.678671	0.396686
Embryo 15.F6	empty cell. frag.	6-cell embryo	PE	MiSeq 150x2 Cycles	10534	9	46798	150	46	29366	0.372495	36-150	44	29216	0.994892	27691	23849	14459	0.947803	0.816299	0.522155	0.308966
Embryo 15.F7	empty cell. frag.	6-cell embryo	PE	MiSeq 150x2 Cycles	17368	3	49066	150	47	29852	0.391595	36-150	44	29664	0.993702	28463	25969	10957	0.959513	0.875438	0.384956	0.223311
Embryo 16.B1	blastomere	7-cell embryo	SE	NextSeq 75 Cycles	11340	5425	3423032	55	41	3365699	0.0167492	36-55	41	2904951	0.863105	2841580	2401004	2248398	0.978185	0.826521	0.791249	0.656844
Embryo 16.B2	blastomere	7-cell embryo	SE	NextSeq 75 Cycles	19358	6551	3599789	55	41	3541050	0.0163173	36-55	41	2931871	0.827967	2869872	2425562	2247919	0.978853	0.827309	0.783282	0.624459
Embryo 16.B4	blastomere	7-cell embryo	SE	NextSeq 75 Cycles	14915	4455	3277895	55	41	3225417	0.0160097	36-55	41	2735151	0.847999	2678846	2263130	2115524	0.979414	0.827424	0.789715	0.645391
Embryo 16.B5	blastomere	7-cell embryo	SE	NextSeq 75 Cycles	22063	5693	2632134	55	41	2584337	0.018159	36-55	41	2055925	0.795533	2006121	1670545	1546251	0.975775	0.812552	0.770767	0.587451
Embryo 16.B8	No WGA	7-cell embryo	SE	NextSeq 75 Cycles	1023	1	23509	55	44	19461	0.172189	36-55	42	14992	0.770361	10932	5863	5255	0.729189	0.391075	0.480699	0.223531
Embryo 16.B3	blastomere	7-cell embryo	SE	NextSeq 75 Cycles	26957	5369	4028524	55	41	3965278	0.0156995	36-55	41	3198129	0.806533	3134345	2644092	2450790	0.980056	0.826762	0.781915	0.608359
Embryo 16.B6	blastomere	7-cell embryo	SE	NextSeq 75 Cycles	25005	242	3049444	55	41	2992941	0.018529	36-55	41	2379023	0.794878	2323406	1939482	1793907	0.976622	0.815243	0.772102	0.588273
Embryo 16.B7	No WGA	7-cell embryo	SE	NextSeq 75 Cycles	655	0	22653	55	44	18484	0.184037	36-55	42	15782	0.85382	11263	6280	5865	0.713661	0.397922	0.520732	0.258906
Embryo 16.F1	empty cell. frag.	7-cell embryo	SE	NextSeq 75 Cycles	756	0	19323	55	44	15441	0.2009	36-55	42	12512	0.81031	9065	4769	4393	0.724504	0.381154	0.484611	0.227346
Embryo 16.F2	empty cell. frag.	7-cell embryo	SE	NextSeq 75 Cycles	396	0	18739	55	43	16269	0.131811	36-55	42	14792	0.909214	10170	5754	5567	0.687534	0.388994	0.547394	0.297081
Embryo 16.F3	empty cell. frag.	7-cell embryo	SE	NextSeq 75 Cycles	1386	0	26056	55	43	23328	0.104698	36-55	42	15691	0.672625	11911	6073	5193	0.759098	0.387037	0.435984	0.199302
Embryo 16.F4	empty cell. frag.	7-cell embryo	SE	NextSeq 75 Cycles	322	3	50342	55	43	46270	0.0808867	36-55	42	43844	0.947569	30130	17223	16831	0.687209	0.392825	0.558613	0.334333
Embryo 16.F5	empty cell. frag.	7-cell embryo	SE	NextSeq 75 Cycles	241	7	70669	55	42	67098	0.0505314	36-55	42	64250	0.957555	42849	24637	24292	0.666911	0.383455	0.566921	0.343743
Embryo 16.F6	empty cell. frag.	7-cell embryo	SE	NextSeq 75 Cycles	384	2	17782	55	44	13780	0.225059	36-55	42	12458	0.904064	8796	4912	4721	0.706052	0.394285	0.536721	0.265493
Embryo 16.PB1	polar body	7-cell embryo	SE	NextSeq 75 Cycles	3469	280	2818972	55	41	2769672	0.0174886	36-55	40	2455507	0.88657	2402876	2039401	1919553	0.978566	0.830542	0.798856	0.680941
Embryo 16.F7	empty cell. frag.	7-cell embryo	SE	NextSeq 75 Cycles	1157	1	18679	55	43	16081	0.139087	36-55	42	10980	0.682793	8185	4163	3494	0.745446	0.379144	0.426878	0.187055
Embryo 17.B1	blastomere	10-cell embryo (tripolar 1st division)	SE	NextSeq 75 Cycles	24504	474	5445826	55	42	5359778	0.0158007	36-55	42	4170327	0.778078	4083229	3469020	3055848	0.979115	0.831834	0.74839	0.561136
Embryo 17.B2	blastomere	10-cell embryo (tripolar 1st division)	SE	NextSeq 75 Cycles	30596	423	5348731	55	42	5259703	0.0166447	36-55	42	3978521	0.756416	3892959	3293708	2896207	0.978494	0.827872	0.74396	0.541476
Embryo 17.B3	blastomere	10-cell embryo (tripolar 1st division)	SE	NextSeq 75 Cycles	20544	55	1211851	55	43	1181978	0.0246507	36-55	43	691418	0.584967	664357	507562	406731	0.960862	0.734088	0.612218	0.335628
Embryo 17.B4	blastomere	10-cell embryo (tripolar 1st division)	SE	NextSeq 75 Cycles	24117	415	4828848	55	42	4753827	0.015536	36-55	42	3705535	0.779485	3629061	3081936	2743754	0.979362	0.831711	0.756051	0.568201
Embryo 17.B5	blastomere	10-cell embryo (tripolar 1st division)	SE	NextSeq 75 Cycles	32032	508	6093966	55	41	5997215	0.0158765	36-55	41	4634932	0.772847	4544077	3864622	3426263	0.980398	0.833803	0.754006	0.562239
Embryo 17.B6	empty blastomere	10-cell embryo (tripolar 1st division)	SE	NextSeq 75 Cycles	9955	6	205640	55	42	199285	0.0309035	36-55	42	76897	0.385864	71256	43345	33155	0.926642	0.563676	0.465294	0.161228
Embryo 17.B7	blastomere	10-cell embryo (tripolar 1st division)	SE	NextSeq 75 Cycles	3498	14	139721	55	43	134184	0.039629	36-55	43	97153	0.724028	91298	67255	61166	0.939734	0.692259	0.66996	0.437772
Embryo 17.B8	blastomere	10-cell embryo (tripolar 1st division)	SE	NextSeq 75 Cycles	18049	60	1056201	55	43	1027516	0.0271587	36-55	42	607528	0.591259	583348	443595	358276	0.960199	0.730164	0.614172	0.339212
Embryo 17.B9B10	blastomere	10-cell embryo (tripolar 1st division)	SE	NextSeq 75 Cycles	7359	297	3599293	55	42	3553232	0.0127972	36-55	42	2898791	0.815818	2839572	2444795	2188189	0.979571	0.843384	0.770605	0.60795
Embryo 17.F2	chromosome(s) in fragment	10-cell embryo (tripolar 1st division)	PE	NextSeq 75x2 Cycles	569	82	275026	60	46	246700	0.11482	36-60	46	241240	0.977868	126138	102195	71791	0.522873	0.423624	0.569146	0.261034
Embryo 17.F2	chromosome(s) in fragment	10-cell embryo (tripolar 1st division)	SE	NextSeq 75 Cycles	136	5	32423	55	44	27545	0.150449	36-55	42	25169	0.913741	20321	15367	14599	0.807382	0.610553	0.718419	0.450267
Embryo 17.F1	empty cell. frag.	10-cell embryo (tripolar 1st division)	SE	NextSeq 75 Cycles	1026	1	33869	55	44	29727	0.122295	36-55	43	22468	0.755811	17482	11434	10394	0.778084	0.508902	0.594554	0.306888
Embryo 17.F3	empty cell. frag.	10-cell embryo (tripolar 1st division)	SE	NextSeq 75 Cycles	2445	6	41342	55	43	37547	0.0917953	36-55	43	18667	0.497164	14516	6783	4884	0.777629	0.363369	0.336456	0.118137
Embryo 18.B1	blastomere	9-cell embryo	SE	NextSeq 75 Cycles	30159	5286	3771054	55	43	3254143	0.137073	36-55	41	2448796	0.752516	2295768	1908432	1693664	0.937509	0.779335	0.737733	0.449122
Embryo 18.B2	blastomere	9-cell embryo	SE	NextSeq 75 Cycles	18088	42	1069640	55	41	1050510	0.0178845	36-55	41	654395	0.622931	631092	499513	436905	0.96439	0.76332	0.6923	0.40846
Embryo 18.B3	blastomere	9-cell embryo	SE	NextSeq 75 Cycles	29659	3818	3692407	55	42	3541685	0.0408194	36-55	41	2577671	0.727809	2504681	2101286	1861503	0.971684	0.815188	0.74321	0.504144
Embryo 18.B4	blastomere	9-cell embryo	SE	NextSeq 75 Cycles	14078	4373	3175568	55	42	3129493	0.0145092	36-55	42	2458257	0.785513	2393290	2020612	1798406	0.973572	0.821969	0.751437	0.566326
Embryo 18.B5	blastomere	9-cell embryo	SE	NextSeq 75 Cycles	26644	5023	3576312	55	41	3512168	0.0179358	36-55	41	2557599	0.728211	2484109	2082107	1834852	0.971266	0.814087	0.738636	0.513057
Embryo 18.B7	blastomere	9-cell embryo	SE	NextSeq 75 Cycles	26720	3068	3829467	55	42	3629418	0.0522394	36-55	41	2716492	0.748465	2639742	2212729	1971859	0.971747	0.814554	0.746989	0.514917
Embryo 18.B8	blastomere	9-cell embryo	SE	NextSeq 75 Cycles	39754	242	4226342	55	42	4164967	0.014522	36-55	41	2817673	0.676517	2757532	2300003	1989012	0.978656	0.816277	0.721302	0.470623
Embryo 18.F1	No WGA	9-cell embryo	SE	NextSeq 75 Cycles	420	1	47049	55	46	33473	0.28855	36-55	43	30196	0.9021	22059	14832	14165	0.730527	0.491191	0.642142	0.301069
Embryo 18.PB1	polar body	9-cell embryo	SE	NextSeq 75 Cycles	679	128	1507634	55	42	1448858	0.0389856	36-55	42	1277498	0.881728	1230313	1046723	960407	0.963065	0.819354	0.78062	0.637029
Embryo 18.PB2	polar body	9-cell embryo	SE	NextSeq 75 Cycles	1045	38	561814	55	44	544780	0.0303196	36-55	44	470461	0.86358	330618	235314	220719	0.702753	0.500177	0.667595	0.392868
Embryo 18.F2	empty cell. frag.	9-cell embryo	SE	NextSeq 75 Cycles	7993	6	198935	55	43	190845	0.0406665	36-55	42	91825	0.48115	76720	43439	34246	0.835502	0.473063	0.446376	0.172147
Embryo 18.F3	empty cell. frag.	9-cell embryo	SE	NextSeq 75 Cycles	6200	5	181431	55	47	129924	0.283893	36-55	44	78108	0.601182	57606	36479	30916	0.737517	0.467033	0.53668	0.170401
Embryo 19.B1	blastomere	4-cell embryo	SE	NextSeq 75 Cycles	8150	259	2484254	55	42	2454864	0.0118305	36-55	42	1935429	0.788406	1896456	1630452	1454892	0.979863	0.842424	0.767164	0.585645
Embryo 19.B2	blastomere	4-cell embryo	SE	NextSeq 75 Cycles	19371	4159	4190845	55	41	4136391	0.0129936	36-55	41	3245377	0.784591	3186971	2721680	2440300	0.982003	0.838633	0.765711	0.582293
Embryo 19.B3	blastomere	4-cell embryo	SE	NextSeq 75 Cycles	10182	6027	4022178	55	42	3969267	0.0131548	36-55	41	3235987	0.815261	3175317	2723066	2440359	0.981251	0.841495	0.76854	0.606726
Embryo 19.B4	blastomere	4-cell embryo	SE	NextSeq 75 Cycles	6433	2446	2036808	55	43	1996584	0.0197485	36-55	43	1576973	0.789836	1535932	1293583	1144420	0.973975	0.820295	0.745098	0.561869
Embryo 19.F2	empty cell. frag.	4-cell embryo	SE	NextSeq 75 Cycles	800	2	34663	55	50	11961	0.654935	36-55	44	7834	0.654962	5180	3157	2664	0.66122	0.402987	0.514286	0.0768543
Embryo 19.F3	No WGA	4-cell embryo	SE	NextSeq 75 Cycles	129	4	38494	55	43	37145	0.0350444	36-55	42	34991	0.942011	33577	27420	26818	0.95959	0.78363	0.798701	0.69668
Embryo 19.F1	empty cell. frag.	4-cell embryo	SE	NextSeq 75 Cycles	309	0	35131	55	51	7619	0.783126	36-55	47	6293	0.825961	3110	1975	1786	0.4942	0.313841	0.574277	0.0508383
Embryo 19.F4	empty cell. frag.	4-cell embryo	SE	NextSeq 75 Cycles	7805	1	130569	55	42	125234	0.0408596	36-55	42	31049	0.247928	28540	10733	4071	0.919192	0.345679	0.142642	0.0311789
Embryo 20.B1	blastomere	7-cell embryo	SE	NextSeq 75 Cycles	16542	25	601403	55	42	581615	0.0329031	36-55	42	323171	0.555644	260054	158161	134363	0.804695	0.489403	0.516673	0.223416
Embryo 20.B3	No WGA	7-cell embryo	SE	NextSeq 75 Cycles	79	8	60401	55	42	57971	0.0402311	36-55	42	55810	0.962723	38938	22858	22576	0.697689	0.409568	0.579794	0.373769
Embryo 20.B4	blastomere	7-cell embryo	SE	NextSeq 75 Cycles	44857	94	2129534	55	41	2087793	0.019601	36-55	41	1044918	0.500489	1012207	776172	653507	0.968695	0.742807	0.645626	0.306878
Embryo 20.B5	blastomere	7-cell embryo	SE	NextSeq 75 Cycles	12645	355	3401224	55	41	3349526	0.0151998	36-55	41	2764338	0.825292	2704249	2281867	2107778	0.978263	0.825466	0.779432	0.619712
Embryo 20.B6	blastomere	7-cell embryo	SE	NextSeq 75 Cycles	6914	152	2266546	55	41	2231598	0.0154191	36-55	41	1825140	0.817862	1784601	1514698	1367411	0.977789	0.829908	0.766228	0.603302
Embryo 20.B2	blastomere	7-cell embryo	SE	NextSeq 75 Cycles	26859	88	2174585	55	42	2140666	0.0155979	36-55	42	1408391	0.657922	1372814	1128153	997477	0.974739	0.801023	0.726593	0.458698
Embryo 20.F1	chromosome(s) in fragment	7-cell embryo	PE	NextSeq 75x2 Cycles	4901	70	245078	60	44	220904	0.109432	36-60	44	201500	0.912161	164674	105004	86253	0.817241	0.521112	0.52378	0.351941
Embryo 20.F1	chromosome(s) in fragment	7-cell embryo	SE	NextSeq 75 Cycles	1138	3	40093	55	43	38182	0.0476642	36-55	43	30166	0.790058	25448	16439	15543	0.843599	0.544951	0.610775	0.387674
Embryo 20.F2	empty cell. frag.	7-cell embryo	SE	NextSeq 75 Cycles	552	1	20919	55	42	19824	0.0523448	36-55	42	16567	0.835704	13233	8568	8204	0.798757	0.517173	0.619965	0.392179
Embryo 20.F3	empty cell. frag.	7-cell embryo	SE	NextSeq 75 Cycles	240	0	13228	55	42	12227	0.0756728	36-55	41	11115	0.909054	8865	5786	5670	0.797571	0.520558	0.639594	0.428636
Embryo 20.F4	empty cell. frag.	7-cell embryo	SE	NextSeq 75 Cycles	162	1	14205	55	42	13478	0.0511792	36-55	42	12669	0.939976	10453	7318	7178	0.825085	0.57763	0.686693	0.505315
Embryo 20.F5	chromosome(s) in fragment	7-cell embryo	PE	NextSeq 75x2 Cycles	4008	43	195018	60	43	175408	0.111796	36-60	43	163190	0.930345	125924	80577	66239	0.77164	0.493762	0.526024	0.339656
Embryo 20.F5	chromosome(s) in fragment	7-cell embryo	SE	NextSeq 75 Cycles	805	2	27064	55	42	25425	0.0605602	36-55	42	20784	0.817463	17183	11293	10785	0.826742	0.543351	0.627655	0.3985
Embryo 20.F6	No WGA	7-cell embryo	SE	NextSeq 75 Cycles	61	2	132397	55	43	128506	0.0293889	36-55	43	110883	0.862862	44792	26129	25774	0.403957	0.235645	0.575415	0.194672
Embryo 20.F7	empty cell. frag.	7-cell embryo	SE	NextSeq 75 Cycles	260	2	30855	55	43	28470	0.077297	36-55	42	26877	0.944046	18572	11139	10882	0.691	0.414444	0.585936	0.352682
Embryo 20.F8	empty cell. frag.	7-cell embryo	SE	NextSeq 75 Cycles	711	3	118503	55	42	114633	0.0326574	36-55	42	107182	0.935001	79122	46917	45969	0.738202	0.437732	0.580989	0.387914
Embryo 20.F9	chromosome(s) in fragment	7-cell embryo	PE	NextSeq 75x2 Cycles	12561	101	426386	60	43	387856	0.099341	36-60	43	333806	0.860644	272031	161928	126273	0.814937	0.485096	0.464186	0.296147
Embryo 20.F9	chromosome(s) in fragment	7-cell embryo	SE	NextSeq 75 Cycles	2367	4	62074	55	42	59001	0.0495054	36-55	41	40446	0.685514	35659	24319	22365	0.881645	0.601271	0.627191	0.360296
Embryo 20.F10	empty cell. frag.	7-cell embryo	SE	NextSeq 75 Cycles	1109	0	15586	55	42	14694	0.0572308	36-55	42	8682	0.590853	7252	3705	3107	0.835291	0.426745	0.428434	0.199346
Embryo 21.B1	blastomere	7-cell embryo	SE	NextSeq 75 Cycles	45371	233	4413739	55	41	4332942	0.0183058	36-55	41	2886587	0.666196	2811788	2351575	1982909	0.974087	0.814656	0.705213	0.449258
Embryo 21.B4	blastomere	7-cell embryo	SE	NextSeq 75 Cycles	52435	468	6492209	55	42	6373191	0.0183324	36-55	41	4520762	0.70934	4419235	3726924	3234895	0.977542	0.824402	0.732003	0.498273
Embryo 21.B5	blastomere	7-cell embryo	SE	NextSeq 75 Cycles	35888	343	5293769	55	41	5204583	0.0168474	36-55	41	3708787	0.7126	3634054	3085818	2592607	0.97985	0.832029	0.71342	0.489747
Embryo 21.B7	blastomere	7-cell embryo	SE	NextSeq 75 Cycles	69798	50	2459448	55	41	2388150	0.0289894	36-55	41	824965	0.345441	776353	567483	389086	0.941074	0.687887	0.501172	0.158201
Embryo 21.B2	blastomere	7-cell embryo	SE	NextSeq 75 Cycles	45986	359	4719637	55	41	4636739	0.0175645	36-55	41	3194488	0.688951	3125616	2615371	2268019	0.97844	0.818714	0.725623	0.480549
Embryo 21.B3	blastomere	7-cell embryo	SE	NextSeq 75 Cycles	24116	370	4635461	55	42	4549479	0.0185487	36-55	42	3246400	0.713576	3161257	2670764	2206717	0.973773	0.822685	0.69805	0.476051
Embryo 21.B6	blastomere	7-cell embryo	SE	NextSeq 75 Cycles	35684	153	3128213	55	41	3059016	0.0221203	36-55	41	1848962	0.60443	1781976	1465689	1146527	0.963771	0.792709	0.643402	0.366512
Embryo 21.F1	chromosome(s) in fragment	7-cell embryo	PE	NextSeq 75x2 Cycles	9832	57	268190	60	45	244976	0.0947603	36-60	45	219086	0.894316	144850	74404	53434	0.661156	0.339611	0.368892	0.199239
Embryo 21.F1	chromosome(s) in fragment	7-cell embryo	SE	NextSeq 75 Cycles	2518	1	54045	55	43	49205	0.089555	36-55	43	32694	0.664445	24922	14258	11998	0.762281	0.436104	0.481422	0.222
Embryo 21.F2	empty cell. frag.	7-cell embryo	SE	NextSeq 75 Cycles	9160	0	140994	55	44	123469	0.124296	36-55	42	48318	0.391337	37396	17161	9382	0.773956	0.355168	0.250882	0.0665418
Embryo 21.F3	chromosome(s) in fragment	7-cell embryo	SE	NextSeq 75 Cycles	49575	36	1454785	55	43	1366345	0.0607925	36-55	42	566604	0.414686	420449	232601	168887	0.742051	0.410518	0.401682	0.116091
Embryo 21.F3	chromosome(s) in fragment	7-cell embryo	PE	NextSeq 75x2 Cycles	91430	261	1883810	60	44	1735888	0.085214	36-60	44	1346134	0.775473	985269	410454	250988	0.731925	0.304913	0.254741	0.133234
Embryo 22.B1	blastomere	13-cell embryo	SE	NextSeq 75 Cycles	14156	350	2355283	55	40	2315756	0.0167823	36-55	40	1814427	0.783514	1756504	1445969	1299288	0.968076	0.796929	0.739701	0.551648
Embryo 22.B10	blastomere	13-cell embryo	SE	NextSeq 75 Cycles	23771	315	2458723	55	40	2410608	0.0195691	36-55	40	1787811	0.741643	1736959	1421142	1272581	0.971556	0.794906	0.732649	0.517578
Embryo 22.B2	blastomere	13-cell embryo	SE	NextSeq 75 Cycles	14892	211	2686057	55	41	2642156	0.016344	36-55	41	2132709	0.807185	2075193	1744138	1587634	0.973031	0.817804	0.765054	0.591065
Embryo 22.B3	blastomere	13-cell embryo	SE	NextSeq 75 Cycles	4023	117	1676109	55	42	1646967	0.0173867	36-55	42	1400657	0.850446	1357271	1140314	1055028	0.969025	0.814128	0.777316	0.629451
Embryo 22.B4	blastomere	13-cell embryo	SE	NextSeq 75 Cycles	2512	20	274601	55	41	270259	0.015812	36-55	41	241632	0.894076	234980	194279	189487	0.972471	0.804028	0.806396	0.690045
Embryo 22.B5	blastomere	13-cell embryo	SE	NextSeq 75 Cycles	16068	147	1980791	55	41	1946376	0.0173744	36-55	41	1514117	0.777916	1463344	1214006	1105883	0.966467	0.801791	0.755723	0.558304
Embryo 22.B6	No WGA	13-cell embryo	SE	NextSeq 75 Cycles	59	2	32657	55	43	30665	0.0609976	36-55	42	29629	0.966216	19740	11590	11424	0.666239	0.391171	0.578723	0.349818
Embryo 22.B7	blastomere	13-cell embryo	SE	NextSeq 75 Cycles	17635	232	1716352	55	41	1683172	0.0193317	36-55	41	1228570	0.729914	1176693	943869	840028	0.957774	0.768266	0.713889	0.489426
Embryo 22.B8	blastomere	13-cell embryo	SE	NextSeq 75 Cycles	15494	139	2001222	55	42	1957564	0.0218157	36-55	41	1546922	0.790228	1490793	1230698	1125348	0.963716	0.795579	0.754865	0.56233
Embryo 22.B9	blastomere	13-cell embryo	SE	NextSeq 75 Cycles	32717	138	2439464	55	42	2380517	0.0241639	36-55	41	1729757	0.726631	1681428	1378346	1262284	0.97206	0.796844	0.750721	0.517443
Embryo 22.B11	blastomere	13-cell embryo	SE	NextSeq 75 Cycles	12198	96	1278877	55	41	1246087	0.0256397	36-55	41	954555	0.766042	906968	754572	668392	0.950147	0.790496	0.736952	0.52264
Embryo 22.B12	blastomere	13-cell embryo	SE	NextSeq 75 Cycles	10524	217	1464427	55	41	1430628	0.02308	36-55	40	1124547	0.786051	1064504	852512	765967	0.946607	0.758094	0.719553	0.523049
Embryo 22.B13	blastomere	13-cell embryo	SE	NextSeq 75 Cycles	15655	305	2008487	55	40	1971264	0.0185329	36-55	40	1521544	0.771862	1470904	1199252	1073271	0.966718	0.788181	0.729668	0.534368
Embryo 22.F2	empty cell. frag.	13-cell embryo	SE	NextSeq 75 Cycles	292	0	18255	55	43	16009	0.123035	36-55	42	14891	0.930164	10769	6219	6072	0.723189	0.417635	0.563841	0.332621
Embryo 22.B14	blastomere	13-cell embryo	SE	NextSeq 75 Cycles	661	207	2385993	55	41	2345526	0.0169602	36-55	41	2084843	0.888859	2041580	1741059	1629869	0.979249	0.835103	0.798337	0.683099
Embryo 23.B1	blastomere	9-cell embryo	SE	NextSeq 75 Cycles	29193	196	3821251	55	42	3758589	0.0163983	36-55	42	2675849	0.711929	2434556	1920676	1651405	0.909826	0.717782	0.678319	0.432163
Embryo 23.B3	blastomere	9-cell embryo	SE	NextSeq 75 Cycles	25900	369	4226427	55	42	4160912	0.0155013	36-55	41	2938914	0.706315	2852456	2396401	1980103	0.970582	0.815404	0.694175	0.468505
Embryo 23.B4	blastomere	9-cell embryo	SE	NextSeq 75 Cycles	6848	496	5865985	55	41	5782603	0.0142145	36-55	41	4668976	0.807418	4549586	3897950	3395777	0.974429	0.834862	0.746393	0.578893
Embryo 23.B9	blastomere	9-cell embryo	SE	NextSeq 75 Cycles	25650	303	5195048	55	42	4869867	0.0625944	36-55	41	3461484	0.710796	3295570	2756639	2230166	0.952069	0.796375	0.676716	0.429287
Embryo 23.B2	blastomere	9-cell embryo	SE	NextSeq 75 Cycles	31622	211	3802900	55	42	3713747	0.0234434	36-55	42	2629393	0.708016	2542263	2117755	1812093	0.966863	0.805416	0.712787	0.476503
Embryo 23.B5	blastomere	9-cell embryo	SE	NextSeq 75 Cycles	77049	219	4974723	55	42	4843226	0.026433	36-55	42	2883718	0.595413	2664560	2079183	1768194	0.924002	0.721008	0.663597	0.355436
Embryo 23.B6	empty blastomere	9-cell embryo	SE	NextSeq 75 Cycles	21992	3	417833	55	42	395354	0.053799	36-55	42	121495	0.307307	100682	46014	25122	0.828693	0.378732	0.249518	0.0601245
Embryo 23.B7	blastomere	9-cell embryo	SE	NextSeq 75 Cycles	16204	46	1142360	55	42	1107854	0.0302059	36-55	42	795646	0.718187	735391	576793	520308	0.924269	0.724937	0.707526	0.455468
Embryo 23.B8	blastomere	9-cell embryo	SE	NextSeq 75 Cycles	19444	33	784057	55	42	750518	0.0427762	36-55	41	446506	0.59493	399314	289305	245028	0.894308	0.647931	0.613622	0.312513
Embryo 23.F1	empty cell. frag.	9-cell embryo	SE	NextSeq 75 Cycles	12360	15	397444	55	44	335523	0.155798	36-55	42	197941	0.589948	142352	78176	63540	0.719164	0.394946	0.446358	0.159872
Embryo 23.PB1	polar body	9-cell embryo	SE	NextSeq 75 Cycles	3038	146	1526012	55	41	1503938	0.0144652	36-55	41	1322091	0.879086	1277125	1075621	1007031	0.965989	0.813576	0.788514	0.65991
Embryo 24.B1	blastomere	9-cell embryo	SE	NextSeq 75 Cycles	48591	408	5262952	55	41	5174944	0.0167222	36-55	41	3583707	0.692511	3489184	2915365	2510086	0.973624	0.813505	0.719391	0.476935
Embryo 24.B2	blastomere	9-cell embryo	SE	NextSeq 75 Cycles	47366	211	3766413	55	41	3703672	0.016658	36-55	41	2110091	0.569729	2055573	1710926	1330885	0.974163	0.81083	0.647452	0.353356
Embryo 24.B3	blastomere	9-cell embryo	SE	NextSeq 75 Cycles	56358	331	4776993	55	41	4696831	0.0167808	36-55	41	2956269	0.629418	2900056	2419450	2028428	0.980985	0.818413	0.699444	0.424624
Embryo 24.B4	blastomere	9-cell embryo	SE	NextSeq 75 Cycles	45136	165	3955278	55	41	3879011	0.0192823	36-55	41	2152498	0.554909	2103138	1746655	1280625	0.977069	0.811455	0.608912	0.323776
Embryo 24.B5	blastomere	9-cell embryo	SE	NextSeq 75 Cycles	71400	101	3064987	55	41	2994251	0.0230787	36-55	41	1233130	0.411833	1155501	892573	643015	0.937047	0.723827	0.556482	0.209794
Embryo 24.B6	blastomere	9-cell embryo	SE	NextSeq 75 Cycles	61814	86	3514809	55	41	3431094	0.0238178	36-55	41	1543686	0.449911	1495240	1199567	797690	0.968617	0.77708	0.533486	0.226951
Embryo 24.B7	blastomere	9-cell embryo	SE	NextSeq 75 Cycles	63571	112	2675223	55	41	2609392	0.0246077	36-55	41	1063881	0.407712	1015658	784279	570447	0.954673	0.737187	0.561653	0.213233
Embryo 24.B8	blastomere	9-cell embryo	SE	NextSeq 75 Cycles	86826	31	2393658	55	42	2312005	0.0341122	36-55	41	477202	0.206402	444655	261448	137042	0.931796	0.547877	0.308198	0.0572521
Embryo 24.B9	blastomere	9-cell embryo	SE	NextSeq 75 Cycles	5489	6	129100	55	44	122521	0.0509605	36-55	43	73775	0.602142	69357	50025	42637	0.940115	0.678075	0.614747	0.330263
Embryo 24.PB1	polar body	9-cell embryo	SE	NextSeq 75 Cycles	17672	348	4285100	55	41	4215975	0.0161315	36-55	41	3332367	0.790414	3253704	2767844	2443123	0.976394	0.830594	0.750874	0.570144
Embryo 24.F1	chromosome(s) in fragment	9-cell embryo	SE	NextSeq 75 Cycles	5367	0	110257	55	43	104137	0.0555067	36-55	43	56821	0.545637	52726	38274	30208	0.927932	0.673589	0.572924	0.273978
Embryo 24.F1	chromosome(s) in fragment	9-cell embryo	PE	NextSeq 75x2 Cycles	25372	30	541358	60	45	489628	0.105652	36-60	45	405926	0.82905	318496	182928	92619	0.784616	0.450644	0.290801	0.171086
Embryo 24.X2	unknown	9-cell embryo	SE	NextSeq 75 Cycles	12712	88	1899834	55	42	1855904	0.0231231	36-55	42	1505984	0.811456	1072371	639996	584472	0.712073	0.424969	0.545028	0.307644
Embryo 25.B1	blastomere	7-cell embryo	SE	NextSeq 75 Cycles	5191	188	1448568	57	42	1405021	0.0300621	36-57	41	1246790	0.887382	572163	526747	481374	0.458909	0.422483	0.841323	0.33231
Embryo 25.B2	empty blastomere	7-cell embryo	SE	NextSeq 75 Cycles	30024	0	491528	57	43	448447	0.0876471	36-57	42	103542	0.23089	86691	36918	5369	0.837254	0.356551	0.0619326	0.0109231
Embryo 25.B3	blastomere	7-cell embryo	SE	NextSeq 75 Cycles	35929	120	1532230	57	42	1475416	0.0370793	36-57	42	957072	0.648679	491334	405391	339837	0.513372	0.423574	0.691662	0.221792
Embryo 25.B4	blastomere	7-cell embryo	SE	NextSeq 75 Cycles	42004	135	1731213	57	42	1671203	0.0346636	36-57	42	1029388	0.615956	531774	433968	360239	0.516592	0.421579	0.677429	0.208085
Embryo 25.B5	blastomere	7-cell embryo	SE	NextSeq 75 Cycles	26047	155	1447002	57	42	1398748	0.0333476	36-57	42	1035717	0.74046	510664	437430	382316	0.493054	0.422345	0.748664	0.264212
Embryo 25.F1	empty cell. frag.	7-cell embryo	SE	NextSeq 75 Cycles	827	0	8401	57	45	6688	0.203904	36-57	43	3779	0.565042	2592	1179	614	0.685896	0.311987	0.236883	0.0730865
Embryo 25.F2	empty cell. frag.	7-cell embryo	SE	NextSeq 75 Cycles	5387	1	70661	57	44	61317	0.132237	36-57	42	23676	0.386125	17084	7726	2669	0.721575	0.326322	0.156228	0.0377719
Embryo 25.F3	empty cell. frag.	7-cell embryo	SE	NextSeq 75 Cycles	728	1	8577	57	44	7011	0.182581	36-57	43	4386	0.625588	2539	1296	849	0.578887	0.295486	0.334384	0.0989857
Embryo 25.F4	empty cell. frag.	7-cell embryo	SE	NextSeq 75 Cycles	926	1	10931	57	45	8040	0.264477	36-57	43	4831	0.600871	3015	1487	861	0.624094	0.307804	0.285572	0.0787668
Embryo 25.PB1	polar body	7-cell embryo	SE	NextSeq 75 Cycles	792	50	444466	57	41	425687	0.0422507	36-57	41	399114	0.937576	169952	157373	148587	0.425823	0.394306	0.874288	0.334305
Embryo 25.F6	No WGA	7-cell embryo	SE	NextSeq 75 Cycles	224	0	9334	57	45	6823	0.269016	36-57	43	6211	0.910303	2079	1557	1458	0.334729	0.250684	0.701299	0.156203
Embryo 25.F7	empty cell. frag.	7-cell embryo	SE	NextSeq 75 Cycles	1184	1	88610	57	46	68384	0.228259	36-57	45	59615	0.871768	15407	12120	10559	0.258442	0.203305	0.685338	0.119163
Embryo 25.F8	empty cell. frag.	7-cell embryo	SE	NextSeq 75 Cycles	549	1	5793	57	44	4837	0.165027	36-57	43	2835	0.586107	1930	944	585	0.680776	0.332981	0.303109	0.100984
Embryo 25.F9	No WGA	7-cell embryo	SE	NextSeq 75 Cycles	113	0	1788	57	42	1511	0.154922	36-57	43	1291	0.854401	567	360	297	0.439194	0.278854	0.52381	0.166107
Embryo 25.F10	empty cell. frag.	7-cell embryo	SE	NextSeq 75 Cycles	454	3	8270	57	44	6469	0.217775	36-57	43	4958	0.766424	2207	1355	1115	0.445139	0.273296	0.505211	0.134825
Embryo 26.B1	blastomere	2-cell embryo	SE	NextSeq 75 Cycles	9617	120	1104101	57	41	1065973	0.0345331	36-57	41	800891	0.751324	378313	321666	289138	0.472365	0.401635	0.764282	0.261876
Embryo 26.B2	blastomere	2-cell embryo	SE	NextSeq 75 Cycles	7602	142	1295596	57	41	1255340	0.0310714	36-57	40	1020042	0.812562	467827	412435	376785	0.458635	0.404331	0.805394	0.29082
Embryo 26.F1	empty cell. frag.	2-cell embryo	SE	NextSeq 75 Cycles	64	0	8091	57	48	2825	0.650847	36-57	44	2600	0.920354	606	372	340	0.233077	0.143077	0.561056	0.042022
Embryo 26.F3	empty cell. frag.	2-cell embryo	SE	NextSeq 75 Cycles	40	1	3192	57	45	2064	0.353383	36-57	42	2029	0.983043	837	684	669	0.412518	0.337112	0.799283	0.209586
Embryo 26.PB1	polar body	2-cell embryo	SE	NextSeq 75 Cycles	152	117	953119	57	41	927239	0.027153	36-57	41	867670	0.935757	380252	354662	335096	0.438245	0.408752	0.881247	0.351578
Embryo 26.F2	empty cell. frag.	2-cell embryo	SE	NextSeq 75 Cycles	89	0	3345	57	45	2218	0.336921	36-57	41	2003	0.903066	934	585	553	0.466301	0.292062	0.592077	0.165321
Embryo 26.F4	empty cell. frag.	2-cell embryo	SE	NextSeq 75 Cycles	421	0	16472	57	46	9764	0.407237	36-57	42	6614	0.677386	3384	1615	1201	0.511642	0.244179	0.354905	0.0729116
Embryo 27.B1	blastomere	2-cell embryo	SE	NextSeq 75 Cycles	223	3693	2315375	57	42	2250266	0.0281203	36-57	42	2007660	0.892188	915171	850115	775379	0.45584	0.423436	0.84725	0.334883
Embryo 27.PB1	polar body	2-cell embryo	SE	NextSeq 75 Cycles	94	138	790365	57	42	763593	0.033873	36-57	42	702051	0.919405	315260	292461	273923	0.449056	0.416581	0.86888	0.346578
Embryo 27.F2	No WGA	2-cell embryo	SE	NextSeq 75 Cycles	39	0	16215	57	48	10536	0.350231	36-57	44	10200	0.968109	2755	2451	2406	0.270098	0.240294	0.873321	0.148381
Embryo 27.F3	empty cell. frag.	2-cell embryo	SE	NextSeq 75 Cycles	5641	1	214787	57	43	174320	0.188405	36-57	41	71811	0.411949	34461	15869	5825	0.479885	0.220983	0.169032	0.0271199
Embryo 27.B2	empty blastomere	2-cell embryo	SE	NextSeq 75 Cycles	41401	6	1853213	57	40	1736735	0.0628519	36-57	40	297314	0.171191	214843	85931	7802	0.722613	0.289024	0.0363149	0.00420999
Embryo 27.PB2	polar body	2-cell embryo	SE	NextSeq 75 Cycles	237	214	1946058	57	42	1889031	0.0293039	36-57	41	1704471	0.902299	756271	708280	648948	0.443698	0.415542	0.858089	0.333468
Embryo 28.B1	blastomere	2-cell embryo	SE	NextSeq 75 Cycles	34707	89	1297847	57	41	1261723	0.0278338	36-57	41	772052	0.611903	390613	311815	263664	0.505941	0.403878	0.675001	0.203155
Embryo 28.B2	blastomere	2-cell embryo	SE	NextSeq 75 Cycles	6797	1461	969293	57	41	944760	0.0253102	36-57	41	829173	0.877655	375963	338062	314264	0.453419	0.40771	0.835891	0.32422
Embryo 28.F1	empty cell. frag.	2-cell embryo	SE	NextSeq 75 Cycles	745	0	11379	57	45	7827	0.312154	36-57	42	5344	0.682765	2783	1440	1068	0.520771	0.269461	0.383759	0.0938571
Embryo 28.PB1	polar body	2-cell embryo	SE	NextSeq 75 Cycles	78	43	343645	57	41	334063	0.0278834	36-57	41	319153	0.955368	140498	130778	125472	0.440221	0.409766	0.893052	0.365121
Embryo 28.F3	empty cell. frag.	2-cell embryo	SE	NextSeq 75 Cycles	1965	1	29602	57	44	23073	0.220559	36-57	42	13124	0.568803	7240	3764	2395	0.551661	0.286803	0.330801	0.0809067
Embryo 28.PB2	polar body	2-cell embryo	SE	NextSeq 75 Cycles	220	56	399546	57	41	385401	0.0354027	36-57	41	365472	0.94829	159689	147665	141137	0.436939	0.404039	0.883824	0.353243
Embryo 28.F5	empty cell. frag.	2-cell embryo	SE	NextSeq 75 Cycles	219	0	4323	57	45	2975	0.31182	36-57	43	2588	0.869916	1245	762	688	0.481066	0.294436	0.55261	0.159149
Embryo 29.B1	blastomere	3-cell embryo	SE	NextSeq 75 Cycles	24254	180	1800321	57	42	1749933	0.0279883	36-57	42	1359572	0.776928	657347	574756	513248	0.483496	0.422748	0.780787	0.285087
Embryo 29.B2	empty blastomere (cell body of B4)	3-cell embryo	SE	NextSeq 75 Cycles	76129	3	1576034	57	42	1510906	0.041324	36-57	42	257499	0.170427	228769	92978	9910	0.888427	0.361081	0.0433188	0.00628794
Embryo 29.B3	blastomere	3-cell embryo	SE	NextSeq 75 Cycles	22981	218	1962083	57	42	1910558	0.0262604	36-57	42	1508939	0.78979	721090	637536	570613	0.477879	0.422506	0.79132	0.29082
Embryo 29.B4	blastomere	3-cell embryo	SE	NextSeq 75 Cycles	257	186	1657470	57	42	1609248	0.0290937	36-57	42	1473483	0.915635	671372	627219	582412	0.455636	0.425671	0.867495	0.351386
Embryo 29.PB1	polar body	3-cell embryo	SE	NextSeq 75 Cycles	236	63	538386	57	42	517066	0.0395998	36-57	42	483441	0.93497	215519	199708	189296	0.445802	0.413097	0.878326	0.351599
Embryo 29.F2	No WGA	3-cell embryo	SE	NextSeq 75 Cycles	323	4	59708	57	48	37668	0.36913	36-57	45	34971	0.928401	9588	8124	7658	0.27417	0.232307	0.798707	0.128258
Embryo 29.F4	empty cell. frag.	3-cell embryo	SE	NextSeq 75 Cycles	6487	1	110587	57	44	92641	0.162279	36-57	43	40533	0.437528	23705	11169	4916	0.584832	0.275553	0.207382	0.0444537
Embryo 29.F6	empty cell. frag.	3-cell embryo	SE	NextSeq 75 Cycles	2591	5	67428	57	46	47709	0.292445	36-57	44	29926	0.627261	12580	6803	4465	0.42037	0.227327	0.354928	0.0662188
Embryo 29.F7	empty cell. frag.	3-cell embryo	SE	NextSeq 75 Cycles	8139	5	263833	57	42	231707	0.121766	36-57	41	145117	0.626295	32327	14903	6557	0.222765	0.102696	0.202834	0.0248528
Embryo 29.F8	empty cell. frag.	3-cell embryo	SE	NextSeq 75 Cycles	1525	2	73772	57	48	45996	0.376511	36-57	45	35538	0.772632	10086	6392	5000	0.283809	0.179864	0.495737	0.0677764
Embryo 29.F3	empty cell. frag.	3-cell embryo	SE	NextSeq 75 Cycles	3849	10	86463	57	44	68765	0.204689	36-57	43	41316	0.600829	20260	11947	8308	0.490367	0.289162	0.410069	0.0960873
Embryo 29.F5	chromosome(s) in fragment	3-cell embryo	PE	NextSeq 75x2 Cycles	25064	153	576336	60	44	527512	0.0925552	36-60	44	429226	0.81368	298863	137738	92447	0.696284	0.320899	0.309329	0.160405
Embryo 29.F5	chromosome(s) in fragment	3-cell embryo	SE	NextSeq 75 Cycles	21842	44	628510	57	43	586855	0.0662758	36-57	43	313193	0.53368	113056	69382	41203	0.360979	0.221531	0.364448	0.0655566
Embryo 30.B1	blastomere	2-cell embryo	SE	NextSeq 75 Cycles	39528	99	1411837	57	42	1367124	0.0316701	36-57	42	819345	0.59932	426454	335050	281370	0.520482	0.408924	0.65979	0.199294
Embryo 30.B2	blastomere	2-cell embryo	SE	NextSeq 75 Cycles	13046	150	1460060	57	42	1416195	0.0300433	36-57	41	1217492	0.859692	563513	502256	463247	0.462847	0.412533	0.82207	0.317279
Embryo 30.F1	empty cell. frag.	2-cell embryo	SE	NextSeq 75 Cycles	3903	3	70775	57	43	59371	0.16113	36-57	42	33934	0.571559	15804	8138	4786	0.465728	0.239818	0.302835	0.0676227
Embryo 30.PB1	polar body	2-cell embryo	SE	NextSeq 75 Cycles	238	65	432270	57	41	418895	0.0309413	36-57	41	398857	0.952165	174505	162033	155237	0.437513	0.406243	0.889585	0.35912
Embryo 30.F3	empty cell. frag.	2-cell embryo	SE	NextSeq 75 Cycles	2473	1	45639	57	45	30592	0.329696	36-57	42	17552	0.573745	9275	4710	2832	0.52843	0.268345	0.305337	0.0620522
Embryo 30.F4	No WGA	2-cell embryo	SE	NextSeq 75 Cycles	424	0	19979	57	50	14475	0.275489	36-57	48	13388	0.924905	4164	3053	2863	0.311025	0.22804	0.68756	0.1433
Embryo 30.F5	No WGA	2-cell embryo	SE	NextSeq 75 Cycles	21	1	3485	57	45	1851	0.468867	36-57	42	1810	0.97785	521	435	435	0.287845	0.240331	0.834933	0.124821
Embryo 30.F6	empty cell. frag.	2-cell embryo	SE	NextSeq 75 Cycles	5155	2	69679	57	43	59833	0.141305	36-57	42	23276	0.389016	16678	7242	2747	0.716532	0.311136	0.164708	0.0394236
Embryo 30.F7	empty cell. frag.	2-cell embryo	SE	NextSeq 75 Cycles	5897	0	74884	57	43	65907	0.119879	36-57	42	25160	0.38175	18533	7949	2778	0.736606	0.315938	0.149895	0.0370974
Embryo 30.F8	empty cell. frag.	2-cell embryo	SE	NextSeq 75 Cycles	7804	0	102101	57	43	90008	0.118442	36-57	42	31162	0.346214	24327	10174	3091	0.780662	0.326487	0.12706	0.0302739
Embryo 30.F9	empty cell. frag.	2-cell embryo	SE	NextSeq 75 Cycles	6327	0	81101	57	43	73169	0.097804	36-57	42	25027	0.342044	19728	8119	2461	0.788269	0.32441	0.124747	0.0303449
Embryo 31.B1	blastomere	2-cell embryo	SE	NextSeq 75 Cycles	19296	2183	1473648	57	41	1433705	0.0271048	36-57	41	1150637	0.802562	538563	472680	429522	0.468056	0.410799	0.797533	0.291469
Embryo 31.B2	blastomere	2-cell embryo	SE	NextSeq 75 Cycles	30925	1895	1601397	57	42	1558757	0.0266268	36-57	41	1102863	0.707527	533118	449489	396673	0.483395	0.407566	0.744062	0.247704
Embryo 31.F1	No WGA	2-cell embryo	SE	NextSeq 75 Cycles	127	1	3499	57	45	2114	0.395827	36-57	42	1903	0.900189	786	450	422	0.413032	0.236469	0.536896	0.120606
Embryo 31.F2	empty cell. frag.	2-cell embryo	SE	NextSeq 75 Cycles	330	5	6120	57	44	5118	0.163725	36-57	42	4253	0.830989	2315	1420	1270	0.544322	0.333882	0.548596	0.207516
Embryo 31.PB1	polar body	2-cell embryo	SE	NextSeq 75 Cycles	521	37	330660	57	41	319974	0.0323172	36-57	41	303608	0.948852	132708	122702	117435	0.437103	0.404146	0.884913	0.355153
Embryo 31.F6	empty cell. frag.	2-cell embryo	SE	NextSeq 75 Cycles	273	0	3796	57	47	2630	0.307165	36-57	43	2113	0.803422	1087	585	510	0.514434	0.276858	0.469181	0.134352
Embryo 31.F7	empty cell. frag.	2-cell embryo	SE	NextSeq 75 Cycles	1005	0	15623	57	45	10950	0.29911	36-57	43	7169	0.654703	3786	2036	1453	0.528107	0.284001	0.383782	0.0930039
Embryo 31.F8	empty cell. frag.	2-cell embryo	SE	NextSeq 75 Cycles	291	2	13921	57	42	12701	0.0876374	36-57	41	11952	0.941028	5489	4494	4293	0.459254	0.376004	0.78211	0.308383
Embryo 31.F3	empty cell. frag.	2-cell embryo	SE	NextSeq 75 Cycles	2491	0	37613	57	46	27071	0.280275	36-57	43	12330	0.455469	7701	3308	1461	0.624574	0.268289	0.189716	0.038843
Embryo 31.PB2	polar body	2-cell embryo	SE	NextSeq 75 Cycles	1438	51	399495	57	41	388442	0.0276674	36-57	41	363230	0.935095	160874	147036	140016	0.442898	0.404801	0.870346	0.350482
Embryo 32.B1	blastomere	2-cell embryo	SE	NextSeq 75 Cycles	30333	2178	1185132	57	42	1147588	0.0316792	36-57	41	752324	0.65557	384192	307673	264945	0.510674	0.408963	0.689616	0.223557
Embryo 32.B2	blastomere	2-cell embryo	SE	NextSeq 75 Cycles	25870	2094	1077882	57	42	1043223	0.0321547	36-57	41	714629	0.68502	362339	294201	256592	0.507031	0.411684	0.708155	0.238052
Embryo 32.F4	No WGA	2-cell embryo	SE	NextSeq 75 Cycles	469	0	27916	57	47	14550	0.478794	36-57	43	12632	0.868179	3559	2439	2147	0.281745	0.193081	0.603259	0.0769093
Embryo 32.F1	chromosome(s) in fragment	2-cell embryo	PE	NextSeq 75x2 Cycles	8276	43	301136	60	43	269062	0.119207	36-60	43	237764	0.883677	216873	139657	122090	0.912136	0.587377	0.562956	0.405431
Embryo 32.F1	chromosome(s) in fragment	2-cell embryo	SE	NextSeq 75 Cycles	6334	9	197162	57	43	184906	0.0621621	36-57	42	129884	0.702433	67121	50756	43146	0.516777	0.390779	0.642809	0.218835
Embryo 32.F2	empty cell. frag.	2-cell embryo	SE	NextSeq 75 Cycles	2008	1	40264	57	46	30127	0.251763	36-57	43	20058	0.665782	9390	5380	3891	0.468142	0.268222	0.414377	0.0966372
Embryo 32.PB1	polar body	2-cell embryo	SE	NextSeq 75 Cycles	2935	43	431949	57	41	417390	0.0337054	36-57	41	381332	0.913611	171157	154184	145502	0.44884	0.40433	0.850108	0.33685
Embryo 33.B1	blastomere	2-cell embryo	SE	NextSeq 75 Cycles	43078	188	2264439	57	42	2203198	0.0270447	36-57	41	1484375	0.673737	727096	608079	529644	0.489833	0.409653	0.728438	0.233896
Embryo 33.B2	blastomere	2-cell embryo	SE	NextSeq 75 Cycles	28008	225	2325133	57	42	2258598	0.0286156	36-57	41	1797073	0.795659	833469	730356	655846	0.463793	0.406414	0.786887	0.282068
Embryo 33.F1	No WGA	2-cell embryo	SE	NextSeq 75 Cycles	310	23	21911	57	42	20589	0.060335	36-57	42	19058	0.92564	7828	6375	5985	0.410746	0.334505	0.764563	0.27315
Embryo 33.X2	unknown	2-cell embryo	SE	NextSeq 75 Cycles	1361	48	818193	57	43	780253	0.0463705	36-57	42	721460	0.924649	211244	186640	174693	0.292801	0.258698	0.826973	0.213511
Embryo 33.PB1	polar body	2-cell embryo	SE	NextSeq 75 Cycles	7933	128	1111924	57	42	1079004	0.0296063	36-57	41	950757	0.881143	421398	378404	352278	0.443224	0.398003	0.835975	0.316818
Embryo 34.B1	blastomere	4-cell embryo	SE	NextSeq 75 Cycles	28568	3009	2187688	57	41	2127056	0.0277151	36-57	41	1655565	0.778336	779765	682318	612440	0.470996	0.412136	0.785416	0.279949
Embryo 34.B2	blastomere	4-cell embryo	SE	NextSeq 75 Cycles	15081	2582	1938941	57	42	1880372	0.0302067	36-57	42	1601728	0.851814	746850	668290	611894	0.466278	0.417231	0.8193	0.315582
Embryo 34.B3	blastomere	4-cell embryo	SE	NextSeq 75 Cycles	41318	2564	2109839	57	41	2051362	0.0277163	36-57	41	1383464	0.674412	678378	566661	494386	0.490347	0.409596	0.728777	0.234324
Embryo 34.B4	blastomere	4-cell embryo	SE	NextSeq 75 Cycles	18972	2392	1850055	57	42	1795595	0.029437	36-57	42	1481857	0.825274	695935	615564	560466	0.469637	0.4154	0.805342	0.302946
Embryo 34.F1	No WGA	4-cell embryo	SE	NextSeq 75 Cycles	221	1	8240	57	45	5918	0.281796	36-57	43	5474	0.924975	1871	1372	1290	0.341798	0.250639	0.689471	0.156553
Embryo 34.PB1	polar body	4-cell embryo	SE	NextSeq 75 Cycles	113	104	657921	57	41	637575	0.0309247	36-57	41	602724	0.945338	264323	246416	234661	0.438547	0.408837	0.887781	0.35667
Embryo 34.F3	empty cell. frag.	4-cell embryo	SE	NextSeq 75 Cycles	756	2	13035	57	44	10945	0.160338	36-57	43	8264	0.755048	4085	2584	2142	0.494313	0.312682	0.524357	0.164327
Embryo 34.F4	No WGA	4-cell embryo	SE	NextSeq 75 Cycles	196	1	7198	57	45	5408	0.24868	36-57	43	4920	0.909763	1759	1303	1239	0.35752	0.264837	0.704377	0.172131
Embryo 34.F5	empty cell. frag.	4-cell embryo	SE	NextSeq 75 Cycles	4000	11	82406	57	44	69396	0.157877	36-57	43	41393	0.596475	20431	12343	8718	0.493586	0.298191	0.426705	0.105793
Embryo 34.F6	empty cell. frag.	4-cell embryo	SE	NextSeq 75 Cycles	6062	3	107748	57	44	93411	0.13306	36-57	42	45671	0.488925	24918	13313	7799	0.545598	0.291498	0.312987	0.0723819
Embryo 34.F7	empty cell. frag.	4-cell embryo	SE	NextSeq 75 Cycles	401	1	15979	57	44	13258	0.170286	36-57	43	12048	0.908734	4449	3465	3224	0.369273	0.2876	0.724657	0.201765
Embryo 34.PB2	polar body	4-cell embryo	SE	NextSeq 75 Cycles	2650	114	935465	57	41	907822	0.02955	36-57	41	839454	0.92469	371417	341150	321415	0.442451	0.406395	0.865375	0.343588
Embryo 35.B1	blastomere	2-cell embryo	SE	NextSeq 75 Cycles	9351	1542	1250240	57	41	1208528	0.0333632	36-57	41	954652	0.78993	441857	384357	349803	0.462846	0.402615	0.791666	0.279789
Embryo 35.B2	blastomere	2-cell embryo	SE	NextSeq 75 Cycles	14581	1530	1371745	57	42	1322693	0.0357588	36-57	41	870841	0.658385	422278	346278	304672	0.484908	0.397636	0.721496	0.222105
Embryo 35.F2	empty cell. frag.	2-cell embryo	SE	NextSeq 75 Cycles	471	0	19309	57	45	13137	0.319644	36-57	43	7641	0.58164	4106	1637	1084	0.537364	0.214239	0.264004	0.0561396
Embryo 35.F3	empty cell. frag.	2-cell embryo	SE	NextSeq 75 Cycles	651	1	28518	57	44	20827	0.269689	36-57	43	11738	0.563595	5993	2707	1875	0.510564	0.230619	0.312865	0.0657479
Embryo 35.F5	No WGA	2-cell embryo	SE	NextSeq 75 Cycles	20	0	2719	57	47	1231	0.54726	36-57	43	1156	0.939074	428	231	227	0.370242	0.199827	0.530374	0.0834866
Embryo 35.PB1	polar body	2-cell embryo	SE	NextSeq 75 Cycles	57	53	489475	57	41	476284	0.0269493	36-57	41	452350	0.949748	197269	182380	174316	0.436098	0.403183	0.883646	0.356129
Embryo 35.F7	No WGA	2-cell embryo	SE	NextSeq 75 Cycles	65	1	1624	57	41	1344	0.172414	36-57	41	1305	0.970982	615	420	405	0.471264	0.321839	0.658537	0.249384
Embryo 35.F4	empty cell. frag.	2-cell embryo	SE	NextSeq 75 Cycles	1294	2	40445	57	44	33220	0.178638	36-57	42	13698	0.412342	8936	3260	1482	0.652358	0.237991	0.165846	0.0366424
Embryo 35.F1	empty cell. frag.	2-cell embryo	SE	NextSeq 75 Cycles	803	0	28216	57	44	22449	0.204388	36-57	42	11264	0.50176	6791	2895	1832	0.602894	0.257013	0.269769	0.0649277
Embryo 36.B1	blastomere	2-cell embryo	SE	NextSeq 75 Cycles	10126	140	1495987	57	41	1440626	0.0370063	36-57	41	1152320	0.799874	529714	462013	419558	0.459693	0.400942	0.792046	0.280456
Embryo 36.B2	blastomere	2-cell embryo	SE	NextSeq 75 Cycles	14987	138	1492447	57	41	1436191	0.0376938	36-57	41	992490	0.691057	470972	394942	348909	0.474536	0.39793	0.740827	0.233783
Embryo 36.F1	empty cell. frag.	2-cell embryo	SE	NextSeq 75 Cycles	373	1	20034	57	52	14273	0.287561	36-57	51	12173	0.852869	2854	1271	1003	0.234453	0.104411	0.351437	0.0500649
Embryo 36.F2	No WGA	2-cell embryo	SE	NextSeq 75 Cycles	117	1	19826	57	47	10350	0.477958	36-57	43	9817	0.948502	2316	1843	1763	0.235917	0.187736	0.761226	0.0889236
Embryo 36.F3	No WGA	2-cell embryo	SE	NextSeq 75 Cycles	21	1	3607	57	46	2297	0.363183	36-57	43	2172	0.945581	692	433	424	0.3186	0.199355	0.612717	0.117549
Embryo 36.F4	No WGA	2-cell embryo	SE	NextSeq 75 Cycles	58	0	4080	57	45	2698	0.338725	36-57	43	2496	0.92513	947	577	561	0.379407	0.23117	0.592397	0.1375
Embryo 36.F5	No WGA	2-cell embryo	SE	NextSeq 75 Cycles	121	10	99455	57	43	86343	0.131839	36-57	42	82515	0.955665	22247	19327	18603	0.269612	0.234224	0.836203	0.187049
Embryo 36.PB1	polar body	2-cell embryo	SE	NextSeq 75 Cycles	61	107	731392	57	41	708162	0.0317614	36-57	41	669926	0.946007	299222	278315	264757	0.446649	0.415441	0.884818	0.361991
Embryo 36.F7	empty cell. frag.	2-cell embryo	SE	NextSeq 75 Cycles	452	6	77034	57	48	41336	0.463406	36-57	44	33861	0.819165	9201	6196	5351	0.271729	0.182983	0.581567	0.0694628
Embryo 36.F8	empty cell. frag.	2-cell embryo	SE	NextSeq 75 Cycles	391	3	51964	57	47	32398	0.37653	36-57	44	26519	0.818538	7050	4514	3895	0.265847	0.170218	0.552482	0.0749557
Embryo 36.F9	empty cell. frag.	2-cell embryo	SE	NextSeq 75 Cycles	870	6	71085	57	47	48896	0.312147	36-57	44	35224	0.720386	11007	6307	4957	0.312486	0.179054	0.45035	0.0697334
Embryo 36.F10	empty cell. frag.	2-cell embryo	SE	NextSeq 75 Cycles	1307	0	74491	57	46	55625	0.253265	36-57	43	33725	0.606292	12812	6550	4418	0.379896	0.194218	0.344833	0.0593092
Embryo 37.B1	blastomere	2 or 3-cell embryo	SE	NextSeq 75 Cycles	13186	1742	1408335	57	42	1360208	0.034173	36-57	41	957961	0.704275	455766	382334	340669	0.475767	0.399112	0.747465	0.241895
Embryo 37.B2	blastomere	2 or 3-cell embryo	SE	NextSeq 75 Cycles	8700	1579	1180072	57	41	1142039	0.0322294	36-57	41	868290	0.760298	406203	347645	315645	0.46782	0.400379	0.777062	0.267479
Embryo 37.PB1	polar body	2 or 3-cell embryo	SE	NextSeq 75 Cycles	102	44	365592	57	41	353990	0.0317348	36-57	41	336538	0.950699	146876	135956	130085	0.436432	0.403984	0.885679	0.35582
Embryo 37.F2	empty cell. frag.	2 or 3-cell embryo	SE	NextSeq 75 Cycles	670	2	27287	57	44	19522	0.284568	36-57	42	11447	0.586364	6062	2843	2052	0.529571	0.248362	0.338502	0.0752006
Embryo 37.F3	empty cell. frag.	2 or 3-cell embryo	SE	NextSeq 75 Cycles	632	0	25725	57	45	19060	0.259086	36-57	42	10638	0.558132	5727	2496	1719	0.538353	0.234631	0.300157	0.0668222
Embryo 37.F4	empty cell. frag.	2 or 3-cell embryo	SE	NextSeq 75 Cycles	1275	7	45180	57	43	39026	0.136211	36-57	42	17929	0.459412	11174	4994	3095	0.623236	0.278543	0.276982	0.0685038
Embryo 37.PB2	polar body	2 or 3-cell embryo	SE	NextSeq 75 Cycles	103	61	479019	57	41	465009	0.0292473	36-57	41	441641	0.949747	192806	177619	170042	0.436567	0.40218	0.881933	0.35498
Embryo 37.F6	No WGA	2 or 3-cell embryo	SE	NextSeq 75 Cycles	274	0	14710	57	44	10581	0.280693	36-57	42	7717	0.729326	3588	1912	1651	0.464948	0.247765	0.460145	0.112237
Embryo 37.F7	empty cell. frag.	2 or 3-cell embryo	SE	NextSeq 75 Cycles	3133	4	98919	57	43	90328	0.0868488	36-57	42	27026	0.299198	20155	7076	2001	0.745763	0.261822	0.0992806	0.0202287
Embryo 38.B1	blastomere	2-cell embryo	SE	NextSeq 75 Cycles	10128	1682	1299188	57	41	1256930	0.0325265	36-57	41	948304	0.75446	444003	380114	344090	0.468207	0.400836	0.774972	0.26485
Embryo 38.B2	blastomere	2-cell embryo	SE	NextSeq 75 Cycles	14412	1437	1349357	57	42	1302523	0.0347084	36-57	41	869376	0.667455	419281	345219	304470	0.482278	0.397088	0.726172	0.225641
Embryo 38.PB1	polar body	2-cell embryo	SE	NextSeq 75 Cycles	123	87	719774	57	41	697722	0.0306374	36-57	41	652697	0.935469	284522	263769	249972	0.435917	0.404122	0.878568	0.347292
Embryo 38.F2	empty cell. frag.	2-cell embryo	SE	NextSeq 75 Cycles	125	0	4725	57	41	4460	0.0560847	36-57	41	3976	0.89148	2135	1548	1449	0.536972	0.389336	0.678689	0.306667
Embryo 38.PB2	polar body	2-cell embryo	SE	NextSeq 75 Cycles	151	140	1027584	57	41	999886	0.0269545	36-57	40	934007	0.934113	407635	377661	356798	0.436437	0.404345	0.875288	0.34722
Embryo 38.F5	No WGA	2-cell embryo	SE	NextSeq 75 Cycles	22	2	2893	57	46	1535	0.469409	36-57	43	1482	0.965472	514	371	369	0.346829	0.250337	0.717899	0.127549
Embryo 38.F4	No WGA	2-cell embryo	SE	NextSeq 75 Cycles	74	0	3503	57	47	1942	0.445618	36-57	43	1814	0.934089	592	312	290	0.326351	0.171996	0.489865	0.0827862
Embryo 39.B1	blastomere	3-cell embryo	SE	NextSeq 75 Cycles	28880	198	1876526	57	42	1824727	0.0276037	36-57	41	1370559	0.751104	647301	558250	494504	0.47229	0.407316	0.763948	0.263521
Embryo 39.B2	blastomere	3-cell embryo	SE	NextSeq 75 Cycles	24603	971	1978727	57	41	1925572	0.0268632	36-57	41	1510529	0.784457	717176	637521	569535	0.474785	0.422051	0.794136	0.287829
Embryo 39.B3	blastomere	3-cell embryo	SE	NextSeq 75 Cycles	18710	227	1887310	57	41	1835228	0.0275959	36-57	41	1514104	0.825022	691386	617739	557294	0.45663	0.40799	0.806053	0.295285
Embryo 39.F1	No WGA	3-cell embryo	SE	NextSeq 75 Cycles	193	0	3115	57	42	2803	0.100161	36-57	42	2510	0.895469	1267	884	822	0.504781	0.352191	0.648777	0.263884
Embryo 39.F2	empty cell. frag.	3-cell embryo	SE	NextSeq 75 Cycles	6794	1	131450	57	44	115380	0.122252	36-57	43	62826	0.544514	30719	18044	11434	0.488954	0.287206	0.372213	0.0869836
Embryo 39.F3	empty cell. frag.	3-cell embryo	SE	NextSeq 75 Cycles	8308	8	130328	57	43	115309	0.11524	36-57	42	49639	0.430487	30637	16022	8173	0.617196	0.32277	0.266769	0.062711
Embryo 39.PB1	polar body	3-cell embryo	SE	NextSeq 75 Cycles	331	80	694920	57	41	672966	0.0315921	36-57	41	632009	0.93914	278310	259294	245712	0.440358	0.410269	0.882872	0.353583
Embryo 39.F5	empty cell. frag.	3-cell embryo	SE	NextSeq 75 Cycles	9869	4	145077	57	43	131681	0.0923372	36-57	42	48910	0.371428	33727	16563	7059	0.689573	0.338642	0.209298	0.0486569
Embryo 39.F6	empty cell. frag.	3-cell embryo	SE	NextSeq 75 Cycles	988	3	20402	57	43	18055	0.115038	36-57	42	14078	0.779729	6960	4942	4277	0.494388	0.351044	0.614511	0.209636
Embryo 40.B1	blastomere	2-cell embryo	SE	NextSeq 75 Cycles	19396	2444	2035886	57	41	1982996	0.0259789	36-57	41	1617426	0.815648	753044	670374	606264	0.465582	0.41447	0.805084	0.297789
Embryo 40.B2	blastomere	2-cell embryo	SE	NextSeq 75 Cycles	31749	2358	2246755	57	41	2187460	0.0263914	36-57	41	1655653	0.756884	788028	689614	614929	0.475962	0.416521	0.780339	0.273697
Embryo 40.PB1	polar body	2-cell embryo	SE	NextSeq 75 Cycles	1619	130	1192308	57	41	1156435	0.030087	36-57	41	1057942	0.91483	473932	440409	410610	0.447975	0.416288	0.86639	0.344382
Embryo 41.B1	blastomere	4-cell embryo (multipolar 1-4)	SE	NextSeq 75 Cycles	13375	235	1931934	57	41	1879164	0.0273146	36-57	41	1604636	0.85391	728838	654565	598590	0.454208	0.407921	0.821294	0.30984
Embryo 41.B2	No WGA	4-cell embryo (multipolar 1-4)	SE	NextSeq 75 Cycles	329	26	46670	57	45	34843	0.253418	36-57	43	33122	0.950607	11095	9617	9298	0.334974	0.290351	0.838035	0.199229
Embryo 41.B3	blastomere	4-cell embryo (multipolar 1-4)	SE	NextSeq 75 Cycles	20514	199	1946523	57	41	1893737	0.0271181	36-57	41	1548740	0.817822	712492	636774	575859	0.460046	0.411156	0.808232	0.29584
Embryo 41.B4	blastomere	4-cell embryo (multipolar 1-4)	SE	NextSeq 75 Cycles	12402	553	2157573	57	41	2101934	0.0257878	36-57	41	1829347	0.870316	829346	760345	696278	0.453356	0.415637	0.839551	0.322714
Embryo 41.PB1	polar body	4-cell embryo (multipolar 1-4)	SE	NextSeq 75 Cycles	211	8	31698	57	41	28754	0.0928765	36-57	40	27305	0.949607	11005	9928	9468	0.40304	0.363596	0.860336	0.298694
Embryo 42.B1	blastomere	5-cell embryo	SE	NextSeq 75 Cycles	8286	50	416852	57	41	403886	0.0311046	36-57	41	314528	0.778754	151027	126112	112403	0.48017	0.400956	0.744258	0.269647
Embryo 42.B2	blastomere	5-cell embryo	SE	NextSeq 75 Cycles	29098	171	1960880	57	41	1904769	0.0286152	36-57	41	1469658	0.771568	697365	608629	542413	0.474508	0.41413	0.777804	0.276617
Embryo 42.B3	blastomere	5-cell embryo	SE	NextSeq 75 Cycles	20322	188	1937996	57	42	1878736	0.030578	36-57	42	1528082	0.813356	712785	631593	568961	0.466457	0.413324	0.798222	0.293582
Embryo 42.B4	blastomere	5-cell embryo	SE	NextSeq 75 Cycles	9734	275	1704011	57	41	1657224	0.027457	36-57	41	1437011	0.867119	636869	577763	525444	0.44319	0.402059	0.825043	0.308357
Embryo 42.B5	blastomere	5-cell embryo	SE	NextSeq 75 Cycles	42229	15	817056	57	42	777582	0.0483125	36-57	42	221203	0.284475	157195	84178	38152	0.710637	0.380546	0.242705	0.0466945
Embryo 42.F1	empty cell. frag.	5-cell embryo	SE	NextSeq 75 Cycles	383	4	12959	57	44	10150	0.216761	36-57	43	9051	0.891724	3731	2905	2716	0.41222	0.320959	0.727955	0.209584
Embryo 43.B1	blastomere	4-cell embryo	PE	NextSeq 75x2 Cycles	22695	787	2565060	60	41	2324462	0.103507	36-60	41	2129354	0.916063	2026429	1670266	1429243	0.951664	0.7844	0.705301	0.557197
Embryo 43.B2	blastomere	4-cell embryo	PE	NextSeq 75x2 Cycles	22563	484	1910106	60	41	1740200	0.0976359	36-60	41	1543976	0.887241	1473962	1164842	1002545	0.954653	0.754443	0.68017	0.524864
Embryo 43.B3	blastomere	4-cell embryo	PE	NextSeq 75x2 Cycles	20772	645	2100548	60	41	1911786	0.0987359	36-60	41	1737280	0.908721	1663593	1349149	1165260	0.957585	0.776587	0.700448	0.554741
Embryo 43.B4	blastomere	4-cell embryo	PE	NextSeq 75x2 Cycles	9364	491	1551430	60	41	1401838	0.106711	36-60	41	1329896	0.94868	1279048	1091984	970804	0.961765	0.821105	0.759005	0.625748
Embryo 43.F3	empty cell. frag.	4-cell embryo	PE	NextSeq 75x2 Cycles	140	0	8098	60	48	7338	0.10357	36-60	47	7222	0.984192	2126	815	478	0.294378	0.11285	0.224835	0.0590269
Embryo 43.F4	empty cell. frag.	4-cell embryo	PE	NextSeq 75x2 Cycles	155	1	9586	60	49	8450	0.134438	36-60	49	8268	0.978462	2671	926	548	0.323053	0.111998	0.205167	0.0571667
Embryo 43.F5	empty cell. frag.	4-cell embryo	PE	NextSeq 75x2 Cycles	370	2	12498	60	44	11476	0.0890554	36-60	44	10772	0.938655	6173	1911	727	0.57306	0.177404	0.117771	0.0581693
Embryo 43.F6	empty cell. frag.	4-cell embryo	PE	NextSeq 75x2 Cycles	168	0	9362	60	46	8474	0.104791	36-60	46	8294	0.978759	2862	1066	631	0.345069	0.128527	0.220475	0.0674001
Embryo 43.F7	empty cell. frag.	4-cell embryo	PE	NextSeq 75x2 Cycles	96	1	8420	60	47	7630	0.103539	36-60	47	7500	0.982962	2081	905	649	0.277467	0.120667	0.311869	0.0770784
Embryo 43.F8	empty cell. frag.	4-cell embryo	PE	NextSeq 75x2 Cycles	68	0	8414	60	46	7614	0.10507	36-60	46	7544	0.990806	2106	1089	898	0.279162	0.144353	0.426401	0.106727
Embryo 43.F9	empty cell. frag.	4-cell embryo	PE	NextSeq 75x2 Cycles	389	1	16912	60	47	15522	0.0895503	36-60	46	14886	0.959026	6317	2393	1331	0.424358	0.160755	0.210701	0.0787015
Embryo 43.PB1	polar body	4-cell embryo	PE	NextSeq 75x2 Cycles	479	455	1427548	60	41	1282866	0.11278	36-60	41	1265520	0.986479	1222253	1107146	1010237	0.965811	0.874855	0.826537	0.707673
Embryo 43.X2	empty cell. frag.	4-cell embryo	PE	NextSeq 75x2 Cycles	591	6	36580	60	45	32986	0.108955	36-60	45	31720	0.96162	9281	3283	1643	0.292591	0.103499	0.177028	0.0449153
Embryo 44.B1	empty blastomere	5-cell embryo	PE	NextSeq 75x2 Cycles	10314	34	298306	60	42	276510	0.0788254	36-60	41	209274	0.756841	161421	60235	21329	0.771338	0.287828	0.132133	0.0715004
Embryo 44.B2	blastomere	5-cell embryo	PE	NextSeq 75x2 Cycles	18389	4414	2233798	60	41	2020398	0.105623	36-60	41	1851926	0.916614	1778286	1471887	1277486	0.960236	0.794787	0.718381	0.57189
Embryo 44.B3	blastomere	5-cell embryo	PE	NextSeq 75x2 Cycles	3830	417	294012	60	41	256868	0.144603	36-60	41	238068	0.926811	228993	178540	162466	0.961881	0.749954	0.70948	0.552583
Embryo 44.B4	blastomere	5-cell embryo	PE	NextSeq 75x2 Cycles	15682	3410	1899994	60	41	1726122	0.10073	36-60	41	1593420	0.923121	1529106	1269092	1114240	0.959638	0.796458	0.728687	0.586444
Embryo 44.B5	blastomere	5-cell embryo	PE	NextSeq 75x2 Cycles	15641	2694	1617914	60	41	1473110	0.0982982	36-60	41	1342724	0.911489	1276147	1040150	901918	0.950416	0.774657	0.706751	0.557457
Embryo 44.F2	empty cell. frag.	5-cell embryo	PE	NextSeq 75x2 Cycles	84	5	14570	60	45	13138	0.108997	36-60	45	12982	0.988126	6721	4062	3702	0.517717	0.312895	0.550811	0.254084
Embryo 44.PB1	polar body	5-cell embryo	PE	NextSeq 75x2 Cycles	70	337	1027086	60	41	928862	0.105747	36-60	41	917156	0.987397	889928	809649	757545	0.970313	0.882782	0.851243	0.737567
Embryo 44.PB2	polar body	5-cell embryo	PE	NextSeq 75x2 Cycles	668	431	1159936	60	41	1040646	0.114631	36-60	41	1026238	0.986155	980496	878316	801900	0.955427	0.85586	0.817851	0.691331
Embryo 45.B2	blastomere	4-cell embryo	PE	NextSeq 75x2 Cycles	15699	631	2107300	60	41	1917072	0.0992284	36-60	41	1778406	0.927668	1715808	1437471	1265177	0.964801	0.808292	0.737365	0.600378
Embryo 45.B3	blastomere	4-cell embryo	PE	NextSeq 75x2 Cycles	15801	583	1980332	60	41	1805190	0.0970214	36-60	41	1662306	0.920848	1592308	1319663	1142233	0.957891	0.793875	0.717344	0.576789
Embryo 45.B4	blastomere	4-cell embryo	PE	NextSeq 75x2 Cycles	15816	666	2303358	60	41	2092760	0.100632	36-60	41	1953602	0.933505	1884164	1595369	1398030	0.964456	0.816629	0.74199	0.606953
Embryo 45.X1	unknown	4-cell embryo	PE	NextSeq 75x2 Cycles	5135	62	233656	60	42	214842	0.0875713	36-60	42	189676	0.882863	139998	72953	49435	0.73809	0.384619	0.353112	0.211572
Embryo 46.B1	blastomere	4-cell embryo	PE	NextSeq 75x2 Cycles	17003	3580	2252984	60	41	2042264	0.10318	36-60	41	1902782	0.931702	1837438	1550706	1356191	0.965659	0.814968	0.738088	0.601953
Embryo 46.B2	blastomere	4-cell embryo	PE	NextSeq 75x2 Cycles	9942	3796	1783844	60	41	1612454	0.106291	36-60	41	1535578	0.952324	1482555	1272868	1139458	0.96547	0.828918	0.768577	0.638765
Embryo 46.B3	blastomere	4-cell embryo	PE	NextSeq 75x2 Cycles	14496	2776	1680960	60	41	1527874	0.100195	36-60	41	1420136	0.929485	1364827	1135279	1003402	0.961054	0.799416	0.735186	0.596922
Embryo 46.B4	blastomere	4-cell embryo	PE	NextSeq 75x2 Cycles	17785	2510	1877226	60	41	1699216	0.10476	36-60	41	1546102	0.909891	1478331	1205016	1051940	0.956167	0.77939	0.711573	0.560369
Embryo 46.F2	unknown	4-cell embryo	PE	NextSeq 75x2 Cycles	2	81	220162	60	44	199054	0.106042	36-60	43	196598	0.987662	131303	91621	78731	0.667876	0.466032	0.599613	0.357605
Embryo 46.PB1	polar body	4-cell embryo	PE	NextSeq 75x2 Cycles	46	50	111118	60	41	99426	0.117595	36-60	41	98464	0.990324	93059	82500	80683	0.945107	0.83787	0.867009	0.726102
Embryo 47.B1	empty blastomere	5-cell embryo	PE	NextSeq 75x2 Cycles	17081	46	716808	60	42	665410	0.0772426	36-60	41	448456	0.673954	344693	92339	8658	0.768622	0.205904	0.025118	0.0120785
Embryo 47.B2	blastomere	5-cell embryo	PE	NextSeq 75x2 Cycles	17353	2839	1853312	60	41	1675426	0.106174	36-60	41	1533718	0.91542	1475496	1214872	1060314	0.962039	0.792109	0.718615	0.572118
Embryo 47.B3	blastomere	5-cell embryo	PE	NextSeq 75x2 Cycles	15196	2700	1627366	60	41	1475918	0.102613	36-60	41	1360634	0.92189	1304449	1068988	940063	0.958707	0.785654	0.720659	0.577659
Embryo 47.B4	blastomere	5-cell embryo	PE	NextSeq 75x2 Cycles	16702	3193	1983544	60	41	1793064	0.106232	36-60	41	1646136	0.918058	1572301	1286901	1128299	0.955146	0.781771	0.71761	0.56883
Embryo 47.B5	blastomere	5-cell embryo	PE	NextSeq 75x2 Cycles	15686	2744	1777496	60	41	1611404	0.103073	36-60	41	1475138	0.915436	1400885	1141247	995900	0.949664	0.773654	0.710908	0.560283
Embryo 47.F1	empty cell. frag.	5-cell embryo	PE	NextSeq 75x2 Cycles	10	2	5984	60	48	5352	0.118087	36-60	48	5300	0.990284	1071	654	610	0.202075	0.123396	0.569561	0.101939
Embryo 47.F2	empty cell. frag.	5-cell embryo	PE	NextSeq 75x2 Cycles	15	0	8276	60	50	7454	0.110276	36-60	50	7388	0.991146	1353	811	733	0.183135	0.109773	0.541759	0.0885694
Embryo 48.B1	blastomere	4-cell embryo	PE	NextSeq 75x2 Cycles	19557	3111	2037168	60	41	1854736	0.0983601	36-60	41	1689806	0.911076	1616772	1321892	1135633	0.95678	0.782274	0.702408	0.557457
Embryo 48.B2	blastomere	4-cell embryo	PE	NextSeq 75x2 Cycles	22046	3809	2456194	60	41	2218926	0.106929	36-60	41	2024530	0.912392	1948176	1601110	1373962	0.962286	0.790855	0.705256	0.559387
Embryo 48.B3	blastomere	4-cell embryo	PE	NextSeq 75x2 Cycles	14215	2950	1938012	60	41	1758282	0.102219	36-60	41	1641714	0.933703	1588845	1345693	1190412	0.967796	0.819688	0.749231	0.614244
Embryo 48.B4	blastomere	4-cell embryo	PE	NextSeq 75x2 Cycles	14664	2825	1701412	60	41	1540012	0.104804	36-60	41	1415418	0.919095	1359332	1129328	988648	0.960375	0.797876	0.727304	0.581075
Embryo 48.F1	empty cell. frag.	4-cell embryo	PE	NextSeq 75x2 Cycles	367	1	12830	60	45	11678	0.098647	36-60	45	10986	0.940743	6341	2001	676	0.577189	0.182141	0.106608	0.052689
Embryo 48.F2	empty cell. frag.	4-cell embryo	PE	NextSeq 75x2 Cycles	120	0	8660	60	47	7648	0.132322	37-60	47	7506	0.981433	2971	1311	984	0.395817	0.17466	0.331202	0.113626
Embryo 49.B1	blastomere	3-cell embryo	PE	NextSeq 75x2 Cycles	2400	667	489222	60	42	437618	0.11792	36-60	42	423596	0.967958	413224	363832	331798	0.975514	0.858913	0.802949	0.678216
Embryo 49.B2	blastomere	3-cell embryo	PE	NextSeq 75x2 Cycles	10498	1877	2049368	60	41	1856950	0.10362	36-60	41	1767844	0.952015	1720728	1491012	1329269	0.973348	0.843407	0.772504	0.648624
Embryo 49.B3	blastomere	3-cell embryo	PE	NextSeq 75x2 Cycles	8311	2256	1954034	60	41	1772892	0.102173	36-60	41	1703870	0.961068	1658705	1451344	1297364	0.973493	0.851793	0.782155	0.663941
Embryo 49.F1	empty cell. frag.	3-cell embryo	PE	NextSeq 75x2 Cycles	210	0	9478	60	45	8526	0.111658	36-60	45	8292	0.972555	3669	1447	965	0.442475	0.174506	0.263014	0.101815
Embryo 49.F2	empty cell. frag.	3-cell embryo	PE	NextSeq 75x2 Cycles	74	0	5058	60	47	4514	0.120514	37-60	47	4432	0.981834	1641	619	418	0.370262	0.139666	0.254723	0.0826414
Embryo 50.ExB8	excluded blastomere	Morula	SE	NextSeq 75 Cycles	2148	1787	3216658	57	42	3136053	0.0250586	36-57	42	2779830	0.88641	1289771	1192892	1081221	0.463975	0.429124	0.838305	0.336132
Embryo 50.ExB8	excluded blastomere	Morula	PE	NextSeq 75x2 Cycles	5310	2347	3210056	60	42	2872938	0.117343	36-60	42	2813598	0.979345	2761856	2475934	2156700	0.98161	0.879989	0.780888	0.671857
Embryo 51.ExB1	empty excluded blastomere	Morula	SE	NextSeq 75 Cycles	51	118	274241	57	45	234046	0.146568	36-57	44	209555	0.895358	66559	60060	54457	0.317621	0.286607	0.818176	0.198574
Embryo 51.ExB4	excluded blastomere	Morula	SE	NextSeq 75 Cycles	6304	5225	2583067	57	42	2514895	0.0263919	36-57	42	2079258	0.826777	957931	870537	778165	0.460708	0.418677	0.812339	0.301256
Embryo 51.ExB4	excluded blastomere	Morula	PE	NextSeq 75x2 Cycles	12473	4616	1961614	60	42	1767168	0.110033	36-60	42	1683950	0.952909	1629370	1403447	1225095	0.967588	0.833426	0.751883	0.624534
Embryo 52.ExB3	empty excluded blastomere	16-cell to Morula	SE	NextSeq 75 Cycles	12473	18	830061	57	43	772111	0.0698141	36-57	42	272957	0.35352	129190	71127	44854	0.473298	0.26058	0.347194	0.054037
Embryo 52.ExB4	empty excluded blastomere	16-cell to Morula	SE	NextSeq 75 Cycles	1441	14	315217	57	45	272687	0.134923	36-57	44	214747	0.787522	60742	48296	41975	0.282854	0.224897	0.691038	0.133162
Embryo 53.ExB5	excluded blastomere	12 to 16-cell embryo	SE	NextSeq 75 Cycles	12054	195	2365519	57	42	2275130	0.0382111	36-57	42	1568779	0.689534	742904	654573	542979	0.473556	0.41725	0.730887	0.229539
Embryo 53.ExB6	excluded blastomere	12 to 16-cell embryo	SE	NextSeq 75 Cycles	18437	309	3031954	57	42	2931858	0.0330137	36-57	42	1872593	0.638705	885851	753357	619643	0.473061	0.402307	0.699489	0.204371
Embryo 53.ExB6	excluded blastomere	12 to 16-cell embryo	PE	NextSeq 75x2 Cycles	35538	612	2111646	60	42	1902422	0.109978	36-60	42	1640790	0.862474	1570800	1206758	928610	0.957344	0.735474	0.59117	0.439756
Embryo 54.ExB1	excluded blastomere	16-cell to Morula	SE	NextSeq 75 Cycles	6777	180	3136300	57	44	3046893	0.0285072	36-57	44	1814909	0.595659	847788	736218	496210	0.467124	0.40565	0.5853	0.158215
Embryo 54.ExB1	excluded blastomere	16-cell to Morula	PE	NextSeq 75x2 Cycles	16128	763	2783062	60	44	2468148	0.127591	36-60	44	2298392	0.931221	2235111	1896627	909803	0.972467	0.825197	0.40705	0.326907
Embryo 54.ExB14	excluded blastomere	16-cell to Morula	SE	NextSeq 75 Cycles	12202	277	2405529	57	42	2329463	0.0316213	36-57	41	2003070	0.859885	857979	796956	702053	0.428332	0.397867	0.818264	0.29185
Embryo 54.ExB2	excluded blastomere	16-cell to Morula	SE	NextSeq 75 Cycles	1527	14	989549	57	43	929157	0.0610298	36-57	43	427957	0.460586	227068	135086	96712	0.530586	0.315653	0.425916	0.0977334
Embryo 54.ExB3	excluded blastomere	16-cell to Morula	SE	NextSeq 75 Cycles	647	14	491190	57	43	448107	0.0877115	36-57	43	345330	0.770642	125111	106613	86387	0.362294	0.308728	0.690483	0.175873
Embryo 55.ExB7	excluded blastomere	18-cell embryo	SE	NextSeq 75 Cycles	2053	82	810564	57	42	789789	0.0256303	36-57	42	706186	0.894145	325144	301220	277660	0.460423	0.426545	0.85396	0.342552
Embryo 55.ExB8	excluded blastomere	18-cell embryo	SE	NextSeq 75 Cycles	1523	271	2426496	57	42	2363391	0.0260066	36-57	42	2055596	0.869766	937787	869823	780833	0.456212	0.423149	0.832634	0.321794
Embryo 56.B1	No WGA	4-cell embryo	SE	NextSeq 75 Cycles	7942	2	856228	55	54	160779	0.812224	36-55	48	107397	0.667979	26568	11617	4425	0.247381	0.108169	0.166554	0.00516802
Embryo 56.B2	empty blastomere	4-cell embryo	SE	NextSeq 75 Cycles	87092	5	1973777	55	43	1850215	0.0626018	36-55	42	279864	0.15126	246233	99553	15932	0.879831	0.355719	0.0647029	0.00807183
Embryo 56.F1	empty cell. frag.	4-cell embryo	SE	NextSeq 75 Cycles	2135	1	28372	55	46	21049	0.258107	36-55	43	10059	0.477885	7561	3356	1894	0.751665	0.333632	0.250496	0.066756
Embryo 56.F10	empty cell. frag.	4-cell embryo	SE	NextSeq 75 Cycles	1791	0	188481	55	53	49294	0.738467	36-55	52	41041	0.832576	5718	2440	1432	0.139324	0.0594527	0.250437	0.00759758
Embryo 56.F2	empty cell. frag.	4-cell embryo	SE	NextSeq 75 Cycles	466	0	84735	55	54	25050	0.704372	36-55	51	23192	0.925828	4348	2251	1994	0.187478	0.0970593	0.458602	0.0235322
Embryo 56.F3	empty cell. frag.	4-cell embryo	SE	NextSeq 75 Cycles	342	1	28882	55	46	21216	0.265425	36-55	43	19478	0.918081	14076	8554	8165	0.722661	0.439162	0.580065	0.282702
Embryo 56.F4	empty cell. frag.	4-cell embryo	SE	NextSeq 75 Cycles	795	0	123755	55	54	24777	0.79979	36-55	52	21711	0.876256	3665	1559	1076	0.168808	0.0718069	0.293588	0.0086946
Embryo 56.F5	empty cell. frag.	4-cell embryo	SE	NextSeq 75 Cycles	1081	0	289377	55	55	110206	0.619161	36-55	55	103855	0.942372	4475	1952	1340	0.0430889	0.0187954	0.299441	0.00463064
Embryo 56.F6	empty cell. frag.	4-cell embryo	SE	NextSeq 75 Cycles	3091	0	60594	55	45	50469	0.167096	36-55	44	27819	0.55121	18002	9145	6490	0.647112	0.328732	0.360515	0.107106
Embryo 56.PB1	polar body	4-cell embryo	SE	NextSeq 75 Cycles	799	143	1515777	55	42	1466089	0.0327805	36-55	41	1311171	0.894332	1281585	1094314	1031829	0.977435	0.834608	0.805119	0.680726
Embryo 56.F8	empty cell. frag.	4-cell embryo	SE	NextSeq 75 Cycles	1465	0	92029	55	51	36644	0.601821	36-55	47	29184	0.79642	12372	6498	5497	0.423931	0.222656	0.44431	0.0597312
Embryo 56.F9	empty cell. frag.	4-cell embryo	SE	NextSeq 75 Cycles	1556	1	55734	55	50	23456	0.579144	36-55	46	15093	0.64346	7490	3455	2426	0.496257	0.228914	0.323899	0.0435282
Embryo 56.F11	empty cell. frag.	4-cell embryo	SE	NextSeq 75 Cycles	3622	0	78343	55	49	43494	0.444826	36-55	44	20499	0.471306	12457	5266	2583	0.607688	0.256891	0.207353	0.0329704
Embryo 56.F12	empty cell. frag.	4-cell embryo	SE	NextSeq 75 Cycles	1887	0	141543	55	52	35732	0.747554	36-55	50	26354	0.737546	6705	2983	1765	0.254421	0.11319	0.263236	0.0124697
Embryo 57.ExB1	empty excluded blastomere	Blastocyst	PE	NextSeq 75x2 Cycles	10321	204	1027512	60	52	933788	0.10037	36-60	52	895780	0.959297	223065	126626	44707	0.249018	0.141358	0.200421	0.04351
Embryo 57.ExB2	empty excluded blastomere	Blastocyst	PE	NextSeq 75x2 Cycles	12712	97	1403482	60	54	1299890	0.0796929	36-60	54	1245338	0.958033	180359	69845	28651	0.144827	0.0560852	0.158855	0.0204142
Embryo 57.ExB3	empty excluded blastomere	Blastocyst	PE	NextSeq 75x2 Cycles	12380	55	335078	60	49	308834	0.0849777	36-60	49	274818	0.889857	120923	41809	24499	0.440011	0.152133	0.2026	0.0731143
Embryo 57.ExB4	excluded blastomere	Blastocyst	PE	NextSeq 75x2 Cycles	126	1283	860104	60	44	776728	0.107343	36-60	43	767394	0.987983	588904	521230	474151	0.767408	0.679221	0.805141	0.551272
Embryo 58.ExF1	empty excluded cell. frag.	Blastocyst	PE	NextSeq 75x2 Cycles	163	21	223476	60	55	205768	0.0860581	36-60	54	203532	0.989133	14218	8200	2748	0.0698563	0.0402885	0.193276	0.0122966
Embryo 58.ExF10	empty excluded cell. frag.	Blastocyst	PE	NextSeq 75x2 Cycles	1059	8	64558	60	49	59050	0.0932769	36-60	49	57774	0.978391	17800	8202	5794	0.308097	0.141967	0.325506	0.0897488
Embryo 58.ExF11	empty excluded cell. frag.	Blastocyst	PE	NextSeq 75x2 Cycles	162	4	46122	60	52	42090	0.0957947	36-60	51	41630	0.989071	8249	4590	3680	0.19815	0.110257	0.446115	0.0797884
Embryo 58.ExF12	empty excluded cell. frag.	Blastocyst	PE	NextSeq 75x2 Cycles	110	11	65840	60	50	60444	0.0892727	36-60	50	59752	0.988551	7656	4320	3147	0.12813	0.0722988	0.41105	0.0477977
Embryo 58.ExF13	empty excluded cell. frag.	Blastocyst	PE	NextSeq 75x2 Cycles	1161	6	155304	60	52	142832	0.0873194	36-60	52	140876	0.986306	17136	7591	4728	0.121639	0.0538843	0.27591	0.0304435
Embryo 58.ExF2	empty excluded cell. frag.	Blastocyst	PE	NextSeq 75x2 Cycles	48	1	19688	60	49	18008	0.0932919	36-60	49	17838	0.99056	4150	2037	1581	0.232649	0.114194	0.380964	0.0803027
Embryo 58.ExF3	empty excluded cell. frag.	Blastocyst	PE	NextSeq 75x2 Cycles	1189	5	47972	60	51	44126	0.0871595	36-60	51	42910	0.972443	12494	4873	3514	0.291168	0.113563	0.281255	0.0732511
Embryo 58.ExF4	empty excluded cell. frag.	Blastocyst	PE	NextSeq 75x2 Cycles	67	9	87538	60	53	80226	0.0911425	36-60	53	79288	0.988308	6231	3545	1933	0.0785869	0.0447104	0.310223	0.0220818
Embryo 58.ExF5	empty excluded cell. frag.	Blastocyst	PE	NextSeq 75x2 Cycles	128	12	118262	60	53	109350	0.0814998	36-60	53	108116	0.988715	7304	4004	1969	0.0675571	0.0370343	0.269578	0.0166495
Embryo 58.ExF6	empty excluded cell. frag.	Blastocyst	PE	NextSeq 75x2 Cycles	370	5	29634	60	48	27022	0.096662	36-60	47	26568	0.983199	8484	3784	2965	0.319332	0.142427	0.349481	0.100054
Embryo 58.ExF7	empty excluded cell. frag.	Blastocyst	PE	NextSeq 75x2 Cycles	12	4	112834	60	55	104376	0.081034	36-60	55	103234	0.989059	5783	3157	1898	0.0560184	0.030581	0.328203	0.0168212
Embryo 58.ExF8	empty excluded cell. frag.	Blastocyst	PE	NextSeq 75x2 Cycles	1445	5	145508	60	53	132654	0.0968987	36-60	53	130640	0.984818	21346	9454	4210	0.163396	0.0723668	0.197227	0.0289331
Embryo 58.ExF9	empty excluded cell. frag.	Blastocyst	PE	NextSeq 75x2 Cycles	2596	2	36018	60	45	33262	0.0828573	36-60	45	29888	0.898563	20321	5520	3072	0.679905	0.18469	0.151174	0.0852907
NTC1	No Template Control	N/A	SE	NextSeq 75 Cycles	84	N/A	43214	55	46	31377	0.273916	36-55	44	28542	0.909647	17655	10491	9876	0.618562	0.367564	0.559388	0.228537
NTC2	No Template Control	N/A	SE	NextSeq 75 Cycles	3	N/A	58907	55	44	45811	0.222317	36-55	42	44403	0.969265	13866	7502	7417	0.312276	0.168953	0.534906	0.12591
NTC3	No Template Control	N/A	SE	NextSeq 75 Cycles	0	N/A	21941	55	47	14285	0.348936	36-55	43	13920	0.974449	9013	5106	5079	0.647486	0.36681	0.563519	0.231484
NTC4	No Template Control	N/A	SE	NextSeq 75 Cycles	30	N/A	38426	55	53	12920	0.663769	36-55	50	11741	0.908746	3825	2295	2135	0.325781	0.195469	0.55817	0.0555613
NTC5	No Template Control	N/A	SE	NextSeq 75 Cycles	104	N/A	6880	57	46	4019	0.415843	36-57	44	3843	0.956208	1326	1090	1059	0.345043	0.283633	0.798643	0.153924
NTC6	No Template Control	N/A	PE	MiSeq 150x2 Cycles	133	N/A	57578	100	56	16534	0.712842	36-100	56	16520	0.999153	6907	4010	559	0.418099	0.242736	0.0809324	0.00970857
NTC7	No Template Control	N/A	SE	NextSeq 75 Cycles	6	N/A	11490	55	52	4036	0.648738	36-55	53	3822	0.946977	789	450	438	0.206436	0.117739	0.555133	0.0381201
NTC8	No Template Control	N/A	SE	NextSeq 75 Cycles	10	N/A	10708	55	53	4109	0.616268	36-55	54	3884	0.945242	405	247	247	0.104274	0.0635942	0.609877	0.0230669
NTC9	No Template Control	N/A	SE	NextSeq 75 Cycles	4	N/A	11187	55	54	3025	0.729597	36-55	57	2859	0.945124	256	150	146	0.0895418	0.0524659	0.570312	0.0130509
NTC10	No Template Control	N/A	PE	NextSeq 75x2 Cycles	0	N/A	7530	60	47	6702	0.123545	36-60	47	6612	0.986571	459	258	223	0.0694192	0.03902	0.485839	0.0296149
Rhesus Fibroblast XX (1S)	single-cell rhesus XX fibroblast	N/A	SE	NextSeq 75 Cycles	1932	N/A	3757178	57	42	3644825	0.0299036	36-57	42	3071644	0.842741	1394348	1289694	1130266	0.453942	0.419871	0.810605	0.300828
Rhesus Fibroblast XX (1R)	single-cell rhesus XX fibroblast	N/A	SE	NextSeq 75 Cycles	788	N/A	2329904	57	43	2257407	0.0311159	36-57	42	2005465	0.888393	875969	810008	733297	0.436791	0.4039	0.837127	0.314733
Rhesus Fibroblast XX (1M)	single-cell rhesus XX fibroblast	N/A	SE	NextSeq 75 Cycles	1165	N/A	2118502	57	42	2050405	0.0321439	36-57	42	1823864	0.889514	820376	762183	691254	0.449801	0.417895	0.842606	0.326294
Rhesus Fibroblast XX (1A)	single-cell rhesus XX fibroblast	N/A	SE	NextSeq 75 Cycles	866	N/A	1960795	57	42	1899461	0.0312802	36-57	42	1748854	0.920711	732215	679969	632250	0.418683	0.388808	0.863476	0.322446
Rhesus Fibroblast XX (1L)	single-cell rhesus XX fibroblast	N/A	SE	NextSeq 75 Cycles	967	N/A	1843344	57	42	1784926	0.0316913	36-57	42	1602568	0.897834	725027	675503	616692	0.452416	0.421513	0.850578	0.334551
Rhesus Fibroblast XX (1O)	single-cell rhesus XX fibroblast	N/A	SE	NextSeq 75 Cycles	719	N/A	1733899	57	41	1683084	0.0293068	36-57	41	1545236	0.918098	681669	635181	592589	0.441142	0.411058	0.869321	0.341767
Rhesus Fibroblast XX (1K)	single-cell rhesus XX fibroblast	N/A	SE	NextSeq 75 Cycles	994	N/A	1764856	57	42	1710504	0.0307968	36-57	41	1538941	0.8997	692898	646325	592271	0.450243	0.41998	0.854774	0.335592
Rhesus Fibroblast XX (1N)	single-cell rhesus XX fibroblast	N/A	SE	NextSeq 75 Cycles	796	N/A	1771618	57	42	1717761	0.0303999	36-57	42	1537376	0.894988	693119	643743	588405	0.450845	0.418728	0.848923	0.332129
Rhesus Fibroblast XX (1Q)	single-cell rhesus XX fibroblast	N/A	SE	NextSeq 75 Cycles	941	N/A	1762498	57	42	1704610	0.0328443	36-57	42	1527437	0.896062	692513	642191	587687	0.453382	0.420437	0.84863	0.33344
Rhesus Fibroblast XX (1H)	single-cell rhesus XX fibroblast	N/A	SE	NextSeq 75 Cycles	1285	N/A	1734740	57	42	1681607	0.0306288	36-57	42	1496540	0.889946	686094	634878	578690	0.458453	0.424231	0.843456	0.333589
Rhesus Fibroblast XX (1C)	single-cell rhesus XX fibroblast	N/A	SE	NextSeq 75 Cycles	809	N/A	1655453	57	42	1590984	0.0389434	36-57	41	1457941	0.916377	635911	590861	548876	0.436171	0.405271	0.863133	0.331556
Rhesus Fibroblast XX (1T)	single-cell rhesus XX fibroblast	N/A	SE	NextSeq 75 Cycles	267	N/A	1605638	57	41	1556064	0.030875	36-57	41	1429910	0.918927	629063	584640	544883	0.439932	0.408865	0.866182	0.339356
Rhesus Fibroblast XX (1I)	single-cell rhesus XX fibroblast	N/A	SE	NextSeq 75 Cycles	1310	N/A	1618398	57	42	1571094	0.0292289	36-57	42	1403022	0.893022	634965	584673	535716	0.45257	0.416724	0.843694	0.331016
Rhesus Fibroblast XX (1D)	single-cell rhesus XX fibroblast	N/A	SE	NextSeq 75 Cycles	555	N/A	1524230	57	41	1477434	0.0307014	36-57	41	1360454	0.920822	594923	553628	517083	0.437297	0.406944	0.86916	0.339242
Rhesus Fibroblast XX (1J)	single-cell rhesus XX fibroblast	N/A	SE	NextSeq 75 Cycles	454	N/A	1502944	57	41	1459212	0.0290976	36-57	41	1340516	0.918657	586776	547071	510401	0.437724	0.408105	0.86984	0.339601
Rhesus Fibroblast XX (1E)	single-cell rhesus XX fibroblast	N/A	SE	NextSeq 75 Cycles	707	N/A	1482099	57	41	1437304	0.030224	36-57	41	1321675	0.919551	580229	540001	503975	0.43901	0.408573	0.868579	0.340041
Rhesus Fibroblast XX (1F)	single-cell rhesus XX fibroblast	N/A	SE	NextSeq 75 Cycles	546	N/A	1421700	57	41	1380765	0.028793	36-57	41	1269192	0.919195	558141	519352	484751	0.439761	0.409199	0.86851	0.340966
Rhesus Fibroblast XX (1B)	single-cell rhesus XX fibroblast	N/A	SE	NextSeq 75 Cycles	460	N/A	1389930	57	41	1348853	0.0295533	36-57	41	1242249	0.920967	546556	509950	476871	0.439973	0.410505	0.872502	0.34309
Rhesus Fibroblast XX (1G)	single-cell rhesus XX fibroblast	N/A	SE	NextSeq 75 Cycles	383	N/A	1361856	57	41	1318399	0.0319101	36-57	41	1218786	0.924444	536719	501941	470427	0.440372	0.411837	0.876487	0.345431
Rhesus Fibroblast XX (1P)	single-cell rhesus XX fibroblast	N/A	SE	NextSeq 75 Cycles	288	N/A	150371	57	46	114715	0.23712	36-57	45	101077	0.881114	23524	20740	18528	0.232733	0.20519	0.787621	0.123215
NTC_RhFbXX	No template control, PBS	N/A	SE	NextSeq 75 Cycles	19	N/A	18521	57	49	10813	0.416176	36-57	46	10372	0.959216	1616	1420	1390	0.155804	0.136907	0.860149	0.0750499
Rhesus Fibroblast XX (1A)	single-cell rhesus XX fibroblast	N/A	PE	MiSeq 150x2 Cycles	N/A	N/A	1934156	150	45	1791316	0.0738513	36-150	45	1790390	0.999483	1772898	1646537	1227855	0.99023	0.919653	0.692569	0.634827
Rhesus Fibroblast XX (1B)	single-cell rhesus XX fibroblast	N/A	PE	MiSeq 150x2 Cycles	N/A	N/A	1948480	150	45	1795276	0.0786274	36-150	45	1794534	0.999587	1778790	1661710	1248560	0.991227	0.925984	0.701915	0.640787
Rhesus Fibroblast XX (1C)	single-cell rhesus XX fibroblast	N/A	PE	MiSeq 150x2 Cycles	N/A	N/A	1880190	150	45	1731838	0.0789027	36-150	45	1730972	0.9995	1718449	1604679	1204012	0.992765	0.927039	0.700639	0.640367
Rhesus Fibroblast XX (1D)	single-cell rhesus XX fibroblast	N/A	PE	MiSeq 150x2 Cycles	N/A	N/A	2273906	150	45	2109436	0.0723293	36-150	45	2108272	0.999448	2092646	1959650	1437664	0.992588	0.929505	0.687008	0.632244
Rhesus Fibroblast XX (1E)	single-cell rhesus XX fibroblast	N/A	PE	MiSeq 150x2 Cycles	N/A	N/A	1625930	150	45	1501760	0.0763686	36-150	45	1501058	0.999533	1491193	1400722	1069363	0.993428	0.933156	0.717119	0.657693
Rhesus Fibroblast XX (5)	5-cell rhesus XX fibroblast	N/A	PE	MiSeq 150x2 Cycles	N/A	N/A	2338268	150	45	2154158	0.0787378	36-150	44	2153374	0.999636	2140530	2006668	1525572	0.994035	0.931872	0.712708	0.652437
Rhesus Fibroblast XX (10)	10-cell rhesus XX fibroblast	N/A	PE	MiSeq 150x2 Cycles	N/A	N/A	2540160	150	45	2365320	0.0688303	36-150	44	2364512	0.999658	2352181	2210740	1679303	0.994785	0.934967	0.713934	0.661101
Rhesus Fibroblast XY (1A)	single-cell rhesus XY fibroblast	N/A	PE	MiSeq 150x2 Cycles	N/A	N/A	1959758	150	45	1824760	0.068885	36-150	45	1823690	0.999414	1808848	1693863	1275781	0.991862	0.928811	0.7053	0.650989
Rhesus Fibroblast XY (1B)	single-cell rhesus XY fibroblast	N/A	PE	MiSeq 150x2 Cycles	N/A	N/A	2135072	150	45	1985216	0.0701878	36-150	45	1984142	0.999459	1969540	1844044	1370821	0.992641	0.929391	0.696011	0.642049
Rhesus Fibroblast XY (1C)	single-cell rhesus XY fibroblast	N/A	PE	MiSeq 150x2 Cycles	N/A	N/A	1914110	150	45	1772394	0.0740375	36-150	44	1771472	0.99948	1757689	1645777	1240336	0.992219	0.929045	0.705663	0.647996
Rhesus Fibroblast XY (1D)	single-cell rhesus XY fibroblast	N/A	PE	MiSeq 150x2 Cycles	N/A	N/A	1753842	150	45	1634762	0.0678967	36-150	45	1633698	0.999349	1614404	1490260	1114554	0.98819	0.9122	0.690381	0.635493
Rhesus Fibroblast XY (1E)	single-cell rhesus XY fibroblast (failed)	N/A	PE	MiSeq 150x2 Cycles	3	N/A	49092	150	52	28786	0.413632	36-150	52	28748	0.99868	21439	6629	1075	0.745756	0.23059	0.0501423	0.0218977
Rhesus Fibroblast XY (5)	5-cell rhesus XY fibroblast	N/A	PE	MiSeq 150x2 Cycles	N/A	N/A	2601968	150	45	2431836	0.0653859	36-150	45	2430934	0.999629	2418485	2277174	1716314	0.994879	0.936749	0.709665	0.659621
Rhesus Fibroblast XY (10)	10-cell rhesus XY fibroblast	N/A	PE	MiSeq 150x2 Cycles	N/A	N/A	3432420	150	45	3218762	0.062247	36-150	45	3217746	0.999684	3202131	3014369	2251004	0.995147	0.936795	0.702971	0.655807
NTC_RhFb1	No template control, PBS	N/A	PE	MiSeq 150x2 Cycles	N/A	N/A	10044	150	46	6340	0.368777	36-150	45	6338	0.999685	3653	1177	166	0.576365	0.185705	0.0454421	0.0165273
NTC_RhFb2	No template control, PBS	N/A	PE	MiSeq 150x2 Cycles	N/A	N/A	4806	150	51	2044	0.574698	36-150	51	2044	1	1288	642	142	0.630137	0.31409	0.110248	0.0295464
Human Monosomy X (10)	10-cell human monosomy X fibroblast	N/A	PE	MiSeq 150x2 Cycles	N/A	N/A	2332296	150	44	2200154	0.0566575	36-100	44	2198900	0.99943	2169248	1993291	1537271	0.986515	0.906495	0.708665	0.659123
Human Monosomy X (5)	5-cell human monosomy X fibroblast	N/A	PE	MiSeq 150x2 Cycles	N/A	N/A	2032106	150	45	1899200	0.0654031	36-100	44	1897976	0.999356	1872410	1713724	1328882	0.98653	0.902922	0.709717	0.653943
Human Monosomy X (1a)	single-cell human monosomy X fibroblast	N/A	PE	MiSeq 150x2 Cycles	N/A	N/A	1546828	150	45	1451222	0.0618078	36-100	44	1449828	0.999039	1415351	1298122	998843	0.97622	0.895363	0.705721	0.645736
Human Monosomy X (1b)	single-cell human monosomy X fibroblast	N/A	PE	MiSeq 150x2 Cycles	N/A	N/A	1537004	150	45	1438178	0.0642978	36-100	45	1436992	0.999175	1408794	1286108	984436	0.980377	0.895	0.698779	0.64049
Human Monosomy X (1c)	single-cell human monosomy X fibroblast	N/A	PE	MiSeq 150x2 Cycles	N/A	N/A	2002958	150	45	1866532	0.0681123	36-100	45	1864720	0.999029	1827928	1663672	1275743	0.980269	0.892183	0.697918	0.636929
Human Monosomy X (1d)	single-cell human monosomy X fibroblast	N/A	PE	MiSeq 150x2 Cycles	N/A	N/A	2041542	150	45	1919054	0.0599978	36-100	45	1917228	0.999048	1876863	1716784	1301975	0.978946	0.895451	0.693697	0.637741
Human Monosomy X (1e)	single-cell human monosomy X fibroblast	N/A	PE	MiSeq 150x2 Cycles	N/A	N/A	1006550	150	44	936402	0.0696915	36-100	44	935600	0.999144	917056	846588	661869	0.98018	0.904861	0.721732	0.657562
NTC_HFbMonosomy	No template control, PBS	N/A	PE	MiSeq 150x2 Cycles	N/A	N/A	4060	150	52	1684	0.585222	36-100	54	1680	0.997625	175	135	79	0.104167	0.0803571	0.451429	0.0194581
Human Trisomy 21 (10)	10-cell human trisomy 21 fibroblast	N/A	PE	MiSeq 150x2 Cycles	N/A	N/A	2146574	150	44	2035206	0.0518817	36-100	44	2034112	0.999462	1999269	1835689	1406327	0.982871	0.902452	0.703421	0.65515
Human Trisomy 21 (5)	5-cell human trisomy 21 fibroblast	N/A	PE	MiSeq 150x2 Cycles	N/A	N/A	1844686	150	44	1742108	0.0556073	36-100	44	1741188	0.999472	1714185	1571945	1213471	0.984492	0.9028	0.7079	0.65782
Human Trisomy 21 (1a)	single-cell human trisomy 21 fibroblast	N/A	PE	MiSeq 150x2 Cycles	N/A	N/A	1425502	150	44	1347502	0.0547176	36-100	44	1346408	0.999188	1306264	1200715	916129	0.970184	0.891791	0.701335	0.642671
Human Trisomy 21 (1b)	single-cell human trisomy 21 fibroblast	N/A	PE	MiSeq 150x2 Cycles	N/A	N/A	1537232	150	44	1448148	0.0579509	36-100	44	1446900	0.999138	1386698	1270232	971643	0.958392	0.877899	0.700688	0.632073
Human Trisomy 21 (1c)	single-cell human trisomy 21 fibroblast	N/A	PE	MiSeq 150x2 Cycles	N/A	N/A	1843126	150	44	1723334	0.0649939	36-100	44	1721744	0.999077	1639783	1503747	1138921	0.952397	0.873386	0.694556	0.617929
Human Trisomy 21 (1d)	single-cell human trisomy 21 fibroblast	N/A	PE	MiSeq 150x2 Cycles	N/A	N/A	2083880	150	44	1963556	0.0577404	36-100	44	1961828	0.99912	1911221	1751762	1318826	0.974204	0.892923	0.690044	0.63287
Human Trisomy 21 (1e)	single-cell human trisomy 21 fibroblast	N/A	PE	MiSeq 150x2 Cycles	N/A	N/A	1448170	150	44	1363828	0.0582404	36-100	44	1362752	0.999211	1330248	1220208	929095	0.976148	0.8954	0.698437	0.641565
NTC_HFbTrisomy21	No template control, PBS	N/A	PE	MiSeq 150x2 Cycles	N/A	N/A	3846	150	47	2824	0.265731	36-100	47	2824	1	149	109	55	0.052762	0.0385977	0.369128	0.0143006

## Sheet: Supplemental_Table_S2
Sample Name	Sample Type	# Chr Affected	1	2	3	4	5	6	7	8	9	10	11	12	13	14	15	16	17	18	19	20	X	Whole Chr	Broken Chr	Preimplantation Day	CNV Analysis
Embryo 1.B1	blastomere	1	1																						1	2	Aneuploid XY
Embryo 1.B2	blastomere	0																								2	Euploid XY
Embryo 1.B3	blastomere	0																								2	Euploid XY
Embryo 1.F1	empty cell. frag.	0																								2
Embryo 1.F2	empty cell. frag.	0																								2
Embryo 2.B1	No WGA	0																								2
Embryo 2.B2	blastomere	2											1	1											2	2	Aneuploid XX
Embryo 2.B3	blastomere	1													1									1		2	Aneuploid XX
Embryo 2.B4	blastomere	4		1			1							1		1								2		2	Aneuploid XX
Embryo 2.B5	blastomere	0																								2	Euploid XX
Embryo 2.B6	blastomere	2	1																1						1	2	Aneuploid XX
Embryo 2.F1	empty cell. frag.	0																								2
Embryo 2.PB1	polar body	0																								2	Euploid polar body
Embryo 3.B1	blastomere	0																								2	Chaotic aneuploid XY
Embryo 3.B2	blastomere	0																								2	Chaotic aneuploid XY
Embryo 3.B3	blastomere	4	1	1		1	1																		4	2	Aneuploid XY
Embryo 3.PB1	polar body	0																								2	Chaotic aneuploid polar body
Embryo 4.B1	blastomere	1																					1	1		4	Aneuploid XX
Embryo 4.B2	blastomere	0																								4	Chaotic aneuploid
Embryo 4.B3	blastomere	3	1				1									1								1	2	4	Aneuploid XY
Embryo 4.B4	blastomere	1					1																	1		4	Aneuploid XY
Embryo 4.B5	empty blastomere	0																								4
Embryo 4.B6	blastomere	0																								4	Chaotic aneuploid
Embryo 4.B7	blastomere	0																								4	Chaotic aneuploid
Embryo 5.B1	blastomere	0																								2	Euploid XX
Embryo 5.B2	blastomere	1		1																					1	2	Aneuploid XX
Embryo 5.B3	blastomere	2	1	1																					2	2	Aneuploid XX
Embryo 5.B4	blastomere	0																								2	Euploid XX
Embryo 5.F1	empty cell. frag.	0																								2
Embryo 5.F2	empty cell. frag.	0																								2
Embryo 5.F3	empty cell. frag.	0																								2
Embryo 5.PB1	polar body	0																								2	Euploid polar body
Embryo 6.B1	No WGA	0																								2
Embryo 6.B2	blastomere	0																								2	Euploid XX
Embryo 6.B3	blastomere	0																								2	Chaotic aneuploid
Embryo 6.B4	blastomere	0																								2	Euploid XX
Embryo 6.B5	blastomere	0																								2	Euploid XX
Embryo 6.PB1	polar body	0																								2	Euploid polar body
Embryo 6.F2	empty cell. frag.	0																								2
Embryo 7.B1	blastomere	3		1			1		1																	2	Euploid XY
Embryo 7.B2	blastomere	0																								2	Euploid XY
Embryo 7.B3	blastomere	0																								2	Chaotic aneuploid
Embryo 7.B4	blastomere	0																								2	Euploid XY
Embryo 7.PB1	polar body	0																								2	Euploid polar body
Embryo 7.PB2	polar body	0																								2	Euploid polar body
Embryo 7.F3	empty cell. frag.	0																								2
Embryo 8.B1	blastomere	0																								2	Euploid XX
Embryo 8.B2	empty blastomere	0																								2
Embryo 8.B3	empty blastomere	0																								2
Embryo 8.F1	chromosome(s) in fragment	2	1										1												2	2	Small piece of Chr1 & 11 Present
Embryo 8.F2	empty cell. frag.	0																								2
Embryo 8.F3	empty cell. frag.	0																								2
Embryo 9.B1	empty blastomere	0																								2
Embryo 9.B2	empty blastomere	0																								2
Embryo 9.B3	No WGA	0																								2
Embryo 9.B4	blastomere	0																								2	Euploid XX
Embryo 9.B5	empty blastomere	0																								2
Embryo 9.PB1	polar body	0																								2	Euploid polar body
Embryo 9.F2	No WGA	0																								2
Embryo 9.F3	No WGA	0																								2
Embryo 9.F4	No WGA	0																								2
Embryo 9.F5	empty cell. frag.	0																								2
Embryo 9.F6	No WGA	0																								2
Embryo 9.F7	No WGA	0																								2
Embryo 10.B1	empty blastomere	0																								4
Embryo 10.B2	blastomere	5		1	1			1		1		1												4	1	4	Aneuploid XY
Embryo 10.B3	blastomere	5	1	1						1				1				1						5		4	Aneuploid XY
Embryo 10.F1	empty cell. frag.	0																								4
Embryo 10.F2	No WGA	0																								4
Embryo 10.F3	No WGA	0																								4
Embryo 11.B1	blastomere	4								1				1		1							1	1	3	4	Aneuploid XX
Embryo 11.B2	empty blastomere	0																								4
Embryo 11.B5	blastomere	0																								4	Chaotic aneuploid
Embryo 11.B3	blastomere	0																								4	Euploid XX
Embryo 11.B4	blastomere	2																	1			1			2	4	Aneuploid XX
Embryo 11.F1	empty cell. frag.	0																								4
Embryo 11.F2	empty cell. frag.	0																								4
Embryo 11.F3	No WGA	0																								4
Embryo 11.F4	No WGA	0																								4
Embryo 11.F5	No WGA	0																								4
Embryo 11.F6	No WGA	0																								4
Embryo 11.F7	empty cell. frag.	0																								4
Embryo 11.F8	empty cell. frag.	0																								4
Embryo 11.PB1	polar body	0																								4	Euploid polar body
Embryo 11.PB2	polar body	0																								4	Euploid polar body
Embryo 12.B1	blastomere	2									1	1													2	2	Aneuploid XY
Embryo 12.B2	No WGA	0																								2
Embryo 12.B3	blastomere	5		1			1					1		1			1							4		2	Aneuploid XY
Embryo 12.B4	blastomere	3										1					1				1			1	2	2	Aneuploid XY
Embryo 12.B5	empty blastomere	0																								2
Embryo 12.B6	blastomere	2																			1		1	2		2	Aneuploid XX
Embryo 12.B7	empty blastomere	0																								2
Embryo 12.F1	empty cell. frag.	0																								2
Embryo 12.F10	empty cell. frag.	0																								2
Embryo 12.F11	empty cell. frag.	0																								2
Embryo 12.F12	empty cell. frag.	0																								2
Embryo 12.F13	empty cell. frag.	0																								2
Embryo 12.F3	empty cell. frag.	0																								2
Embryo 12.F4	empty cell. frag.	0																								2
Embryo 12.F5	empty cell. frag.	0																								2
Embryo 12.F6	empty cell. frag.	0																								2
Embryo 12.F7	empty cell. frag.	0																								2
Embryo 12.F8	empty cell. frag.	0																								2
Embryo 12.F9	empty cell. frag.	0																								2
Embryo 12.X2	unknown	2																			1		1	2		2	Aneuploid XX
Embryo 13.B1	blastomere	4		1							1			1							1			3		2	Aneuploid XX
Embryo 13.B2	blastomere	0																								2	Euploid XX
Embryo 13.B3	empty blastomere	0																								2
Embryo 13.B4	empty blastomere	0																								2
Embryo 13.B5	blastomere	4		1							1			1							1			3		2	Aneuploid XX
Embryo 13.B6	blastomere	0																								2	Euploid XX
Embryo 13.B7B8	blastomere	0																								2	Euploid XX
Embryo 13.F1	empty cell. frag.	0																								2
Embryo 13.F10	empty cell. frag.	0																								2
Embryo 13.F12	empty cell. frag.	0																								2
Embryo 13.F13	empty cell. frag.	0																								2
Embryo 13.F2	empty cell. frag.	0																								2
Embryo 13.F3	empty cell. frag.	0																								2
Embryo 13.F4	empty cell. frag.	0																								2
Embryo 13.F5	empty cell. frag.	0																								2
Embryo 13.F6	empty cell. frag.	0																								2
Embryo 13.F7	empty cell. frag.	0																								2
Embryo 13.F8	empty cell. frag.	0																								2
Embryo 13.F9	chromosome(s) in fragment	3		1							1			1										2	1	2	Whole Chr9 & 12 present as well as small piece of Chr2
Embryo 13.X11	unknown	0																								2	Euploid XX biparental
Embryo 14.B1	blastomere	0																								2	Euploid XY
Embryo 14.B2	blastomere	1																			1				1	2	Aneuploid XY
Embryo 14.B3	blastomere	0																								2	Euploid XY
Embryo 14.B4	blastomere	1																			1				1	2	Aneuploid XY
Embryo 14.B5	blastomere	0																								2	Euploid XY
Embryo 14.B6	blastomere	0																								2	Euploid XY
Embryo 14.B7	blastomere	1																			1				1	2	Aneuploid XY
Embryo 14.F1	empty cell. frag.	0																								2
Embryo 14.F2	empty cell. frag.	0																								2
Embryo 14.F3	empty cell. frag.	0																								2
Embryo 14.F4	empty cell. frag.	0																								2
Embryo 15.B1	blastomere	2	1																		1			1	1	2	Aneuploid XX
Embryo 15.B2	blastomere	2	1																		1			1	1	2	Aneuploid XX
Embryo 15.B3	blastomere	1	1																					1		2	Aneuploid XX
Embryo 15.F1	empty cell. frag.	0																								2
Embryo 15.F2	empty cell. frag.	0																								2
Embryo 15.F3	empty cell. frag.	0																								2
Embryo 15.F5	empty cell. frag.	0																								2
Embryo 15.F6	empty cell. frag.	0																								2
Embryo 15.F7	empty cell. frag.	0																								2
Embryo 15.PB1	polar body	0																								2	Euploid polar body
Embryo 16.B1	blastomere	0																								2	Euploid XY
Embryo 16.B2	blastomere	0																								2	Chaotic aneuploid
Embryo 16.B3	blastomere	0																								2	Euploid XY
Embryo 16.B4	blastomere	3		1					1								1							1	2	2	Aneuploid XY
Embryo 16.B5	blastomere	0																								2	Chaotic aneuploid
Embryo 16.B6	blastomere	0																								2	Chaotic aneuploid
Embryo 16.B7	No WGA	0																								2
Embryo 16.B8	No WGA	0																								2
Embryo 16.F1	empty cell. frag.	0																								2
Embryo 16.F2	empty cell. frag.	0																								2
Embryo 16.F3	empty cell. frag.	0																								2
Embryo 16.F4	empty cell. frag.	0																								2
Embryo 16.F5	empty cell. frag.	0																								2
Embryo 16.F6	empty cell. frag.	0																								2
Embryo 16.F7	empty cell. frag.	0																								2
Embryo 16.PB1	polar body	0																								2	Euploid polar body
Embryo 17.B1	blastomere	3				1				1								1						3		4	Aneuploid XX
Embryo 17.B2	blastomere	3				1				1								1						3		4	Aneuploid XX
Embryo 17.B3	blastomere	2															1				1			2		4	Aneuploid; Only whole Chr15 & 19 present
Embryo 17.B4	blastomere	4				1				1								1					1	3	1	4	Aneuploid XX
Embryo 17.B5	blastomere	6				1				1		1					1	1			1			5		4	Aneuploid XX
Embryo 17.B6	empty blastomere	0																								4	Empty
Embryo 17.B7	blastomere	2															1				1			2		4	Aneuploid. Only whole Chr15 & 19 present
Embryo 17.B8	blastomere	2															1				1			2		4	Aneuploid. Only whole Chr15 & 19 present
Embryo 17.B9B10	blastomere	5				1				1							1	1			1			5		4	Aneuploid XX
Embryo 17.F1	empty cell. frag.	0																								4
Embryo 17.F2	chromosome(s) in fragment	1					1																		1	4	Small piece of Chr5 present
Embryo 17.F3	empty cell. frag.	0																								4
Embryo 18.B1	blastomere	0																								4	Chaotic aneuploid
Embryo 18.B2	blastomere	0																								4	Chaotic aneuploid
Embryo 18.B3	blastomere	0																								4	Chaotic aneuploid
Embryo 18.B4	blastomere	0																								4	Chaotic aneuploid
Embryo 18.B5	blastomere	0																								4	Chaotic aneuploid
Embryo 18.B7	blastomere	0																								4	Chaotic aneuploid
Embryo 18.B8	blastomere	0																								4	Chaotic aneuploid
Embryo 18.F1	No WGA	0																								4
Embryo 18.F2	empty cell. frag.	0																								4
Embryo 18.F3	empty cell. frag.	0																								4
Embryo 18.PB1	polar body	1																			1			1		4	Aneuploid polar body
Embryo 18.PB2	polar body	2										1									1			2		4	Aneuploid polar body
Embryo 19.B1	blastomere	0																								4	Chaotic aneuploid
Embryo 19.B2	blastomere	2														1					1			1	1	4	Aneuploid XY
Embryo 19.B3	blastomere	2														1					1			2		4	Aneuploid XY
Embryo 19.B4	blastomere	0																								4	Chaotic aneuploid
Embryo 19.F1	empty cell. frag.	0																								4
Embryo 19.F2	empty cell. frag.	0																								4
Embryo 19.F3	No WGA	0																								4
Embryo 19.F4	empty cell. frag.	0																								4
Embryo 20.B1	blastomere	0																								4	Chaotic aneuploid
Embryo 20.B2	blastomere	0																								4	Chaotic aneuploid
Embryo 20.B3	No WGA	0																								4
Embryo 20.B4	blastomere	0																								4	Chaotic aneuploid
Embryo 20.B5	blastomere	0																								4	Chaotic aneuploid
Embryo 20.B6	blastomere	0																								4	Chaotic aneuploid
Embryo 20.F1	chromosome(s) in fragment	1																			1			1		4	Whole Chr19 present in fragment
Embryo 20.F10	empty cell. frag.	0																								4
Embryo 20.F2	empty cell. frag.	0																								4
Embryo 20.F3	empty cell. frag.	0																								4
Embryo 20.F4	empty cell. frag.	0																								4
Embryo 20.F5	chromosome(s) in fragment	1							1																1	4	Piece of Chr7 present in fragment
Embryo 20.F6	No WGA	0																								4
Embryo 20.F7	empty cell. frag.	0																								4
Embryo 20.F8	empty cell. frag.	0																								4
Embryo 20.F9	chromosome(s) in fragment	1												1											1	4	Q arm end piece of Chr12 present in fragment
Embryo 21.B1	blastomere	0																								4	Chaotic aneuploid
Embryo 21.B2	blastomere	0																								4	Chaotic aneuploid
Embryo 21.B3	blastomere	0																								4	Chaotic aneuploid
Embryo 21.B4	blastomere	0																								4	Chaotic aneuploid
Embryo 21.B5	blastomere	0																								4	Chaotic aneuploid
Embryo 21.B6	blastomere	0																								4	Chaotic aneuploid
Embryo 21.B7	blastomere	0																								4	Chaotic aneuploid
Embryo 21.F1	chromosome(s) in fragment	1										1													1	4	Piece of Chr10 present in fragment
Embryo 21.F2	empty cell. frag.	0																								4
Embryo 21.F3	chromosome(s) in fragment	1			1																				1	4	Piece of Chr3 present in fragment
Embryo 22.B1	blastomere	0																								4	Chaotic aneuploid
Embryo 22.B10	blastomere	0																								4	Chaotic aneuploid
Embryo 22.B11	blastomere	0																								4	Chaotic aneuploid
Embryo 22.B12	blastomere	0																								4	Chaotic aneuploid
Embryo 22.B13	blastomere	0																								4	Chaotic aneuploid
Embryo 22.B14	blastomere	0																								4	Chaotic aneuploid
Embryo 22.B2	blastomere	0																								4	Chaotic aneuploid
Embryo 22.B3	blastomere	0																								4	Chaotic aneuploid
Embryo 22.B4	blastomere	0																								4	Chaotic aneuploid
Embryo 22.B5	blastomere	0																								4	Chaotic aneuploid
Embryo 22.B6	No WGA	0																								4
Embryo 22.B7	blastomere	0																								4	Chaotic aneuploid
Embryo 22.B8	blastomere	0																								4	Chaotic aneuploid
Embryo 22.B9	blastomere	0																								4	Chaotic aneuploid
Embryo 22.F2	empty cell. frag.	0																								4
Embryo 23.B1	blastomere	0																								4	Chaotic aneuploid
Embryo 23.B2	blastomere	0																								4	Chaotic aneuploid
Embryo 23.B3	blastomere	0																								4	Chaotic aneuploid
Embryo 23.B4	blastomere	0																								4	Chaotic aneuploid
Embryo 23.B5	blastomere	0																								4	Chaotic aneuploid
Embryo 23.B6	empty blastomere	0																								4
Embryo 23.B7	blastomere	0																								4	Chaotic aneuploid
Embryo 23.B8	blastomere	0																								4	Chaotic aneuploid
Embryo 23.B9	blastomere	0																								4	Chaotic aneuploid
Embryo 23.F1	empty cell. frag.	0																								4
Embryo 23.PB1	polar body	0																								4	Chaotic aneuploid polar body
Embryo 24.B1	blastomere	0																								4	Chaotic aneuploid
Embryo 24.B2	blastomere	0																								4	Chaotic aneuploid
Embryo 24.B3	blastomere	0																								4	Chaotic aneuploid
Embryo 24.B4	blastomere	0																								4	Chaotic aneuploid
Embryo 24.B5	blastomere	0																								4	Chaotic aneuploid
Embryo 24.B6	blastomere	0																								4	Chaotic aneuploid
Embryo 24.B7	blastomere	0																								4	Chaotic aneuploid
Embryo 24.B8	blastomere	0																								4	Chaotic aneuploid
Embryo 24.B9	blastomere	0																								4	Chaotic aneuploid
Embryo 24.F1	chromosome(s) in fragment	1					1																		1	4	Piece of Chr5 p arm end present in fragment
Embryo 24.PB1	polar body	0																								4	Chaotic aneuploid polar body
Embryo 24.X2	unknown	1					1																			4	Euploid XX biparental
Embryo 25.B1	blastomere	0																								2	Euploid XX
Embryo 25.B2	empty blastomere	0																								2
Embryo 25.B3	blastomere	0																								2	Euploid XX
Embryo 25.B4	blastomere	0																								2	Euploid XX
Embryo 25.B5	blastomere	0																								2	Euploid XX
Embryo 25.F1	empty cell. frag.	0																								2
Embryo 25.F10	empty cell. frag.	0																								2
Embryo 25.F2	empty cell. frag.	0																								2
Embryo 25.F3	empty cell. frag.	0																								2
Embryo 25.F4	empty cell. frag.	0																								2
Embryo 25.F6	No WGA	0																								2
Embryo 25.F7	empty cell. frag.	0																								2
Embryo 25.F8	empty cell. frag.	0																								2
Embryo 25.F9	No WGA	0																								2
Embryo 25.PB1	polar body	0																								2	Euploid polar body
Embryo 26.B1	blastomere	0																								1	Euploid XX
Embryo 26.B2	blastomere	0																								1	Euploid XX
Embryo 26.F1	empty cell. frag.	0																								1
Embryo 26.F2	empty cell. frag.	0																								1
Embryo 26.F3	empty cell. frag.	0																								1
Embryo 26.F4	empty cell. frag.	0																								1
Embryo 26.PB1	polar body	0																								1	Euploid polar body
		0
Embryo 27.B1	blastomere	0																								1	Euploid XY
Embryo 27.B2	empty blastomere	0																								1
Embryo 27.F2	No WGA	0																								1
Embryo 27.F3	empty cell. frag.	0																								1
Embryo 27.PB1	polar body	0																								1	Euploid polar body
Embryo 27.PB2	polar body	0																								1	Euploid polar body
		0
Embryo 28.B1	blastomere	0																								1	Chaotic aneuploid
Embryo 28.B2	blastomere	0																								1	Chaotic aneuploid
Embryo 28.F1	empty cell. frag.	0																								1
Embryo 28.F3	empty cell. frag.	0																								1
Embryo 28.F5	empty cell. frag.	0																								1
Embryo 28.PB1	polar body	0																								1	Euploid polar body
Embryo 28.PB2	polar body	0																								1	Euploid polar body
Embryo 29.B1	blastomere	1									1														1	1	Aneuploid XX
Embryo 29.B2	empty blastomere	0																								1	Empty; Lysed blastomere
Embryo 29.B3	blastomere	0																								1	Euploid XX
Embryo 29.B4	blastomere	1									1														1	1	Aneuploid XX
Embryo 29.F2	No WGA	0																								1
Embryo 29.F3	empty cell. frag.	0																								1
Embryo 29.F4	empty cell. frag.	0																								1
Embryo 29.F5	chromosome(s) in fragment	1																					1	1		1	Whole ChrX present in fragment
Embryo 29.F6	empty cell. frag.	0																								1
Embryo 29.F7	empty cell. frag.	0																								1
Embryo 29.F8	empty cell. frag.	0																								1
Embryo 29.PB1	polar body	0																								1	Euploid polar body
Embryo 30.B1	blastomere	0																								1	Euploid XX
Embryo 30.B2	blastomere	0																								1	Euploid XX
Embryo 30.F1	empty cell. frag.	0																								1
Embryo 30.F3	empty cell. frag.	0																								1
Embryo 30.F4	No WGA	0																								1
Embryo 30.F5	No WGA	0																								1
Embryo 30.F6	empty cell. frag.	0																								1
Embryo 30.F7	empty cell. frag.	0																								1
Embryo 30.F8	empty cell. frag.	0																								1
Embryo 30.F9	empty cell. frag.	0																								1
Embryo 30.PB1	polar body	0																								1	Euploid polar body
		0
Embryo 31.B1	blastomere	0																								1	Euploid XY
Embryo 31.B2	blastomere	0																								1	Euploid XY
Embryo 31.F1	No WGA	0																								1
Embryo 31.F2	empty cell. frag.	0																								1
Embryo 31.F3	empty cell. frag.	0																								1
Embryo 31.F6	empty cell. frag.	0																								1
Embryo 31.F7	empty cell. frag.	0																								1
Embryo 31.F8	empty cell. frag.	0																								1
Embryo 31.PB1	polar body	0																								1	Euploid polar body
Embryo 31.PB2	polar body	0																								1	Euploid polar body
		0
Embryo 32.B1	blastomere	2																		1			1	1	1	1	Aneuploid OY
Embryo 32.B2	blastomere	2																		1			1	1	1	1	Aneuploid OY
Embryo 32.F1	chromosome(s) in fragment	3							1			1	1											3		1	Whole Chr7, 10 & 11 present in fragment
Embryo 32.F2	empty cell. frag.	0																								1
Embryo 32.F4	No WGA	0																								1
Embryo 32.PB1	polar body	2							1											1				2		1	Aneuploid polar body
Embryo 33.B1	blastomere	0																								1	Euploid XX
Embryo 33.B2	blastomere	0																								1	Euploid XX
Embryo 33.F1	No WGA	0																								1
Embryo 33.PB1	polar body	0																								1	Euploid polar body
Embryo 33.X2	unknown	0																								1	Euploid XX biparental
Embryo 34.B1	blastomere	0																								1	Euploid XY
Embryo 34.B2	blastomere	0																								1	Euploid XY
Embryo 34.B3	blastomere	0																								1	Euploid XY
Embryo 34.B4	blastomere	0																								1	Euploid XY
Embryo 34.F1	No WGA	0																								1
Embryo 34.F3	empty cell. frag.	0																								1
Embryo 34.F4	No WGA	0																								1
Embryo 34.F5	empty cell. frag.	0																								1
Embryo 34.F6	empty cell. frag.	0																								1
Embryo 34.F7	empty cell. frag.	0																								1
Embryo 34.PB1	polar body	0																								1	Euploid polar body
Embryo 34.PB2	polar body	0																								1	Euploid polar body
Embryo 35.B1	blastomere	0																								1	Euploid XY
Embryo 35.B2	blastomere	0																								1	Euploid XY
Embryo 35.F1	empty cell. frag.	0																								1
Embryo 35.F2	empty cell. frag.	0																								1
Embryo 35.F3	empty cell. frag.	0																								1
Embryo 35.F4	empty cell. frag.	0																								1
Embryo 35.F5	No WGA	0																								1
Embryo 35.F7	No WGA	0																								1
Embryo 35.PB1	polar body	0																								1	Euploid polar body
Embryo 36.B1	blastomere	2			1											1								2		1	Aneuploid XX
Embryo 36.B2	blastomere	2			1											1								2		1	Aneuploid XX
Embryo 36.F1	empty cell. frag.	0																								1
Embryo 36.F10	empty cell. frag.	0																								1
Embryo 36.F2	No WGA	0																								1
Embryo 36.F3	No WGA	0																								1
Embryo 36.F4	No WGA	0																								1
Embryo 36.F5	No WGA	0																								1
Embryo 36.F7	empty cell. frag.	0																								1
Embryo 36.F8	empty cell. frag.	0																								1
Embryo 36.F9	empty cell. frag.	0																								1
Embryo 36.PB1	polar body	0																								1	Euploid polar body
Embryo 37.B1	blastomere	0																								1	Euploid XY
Embryo 37.B2	blastomere	0																								1	Euploid XY
Embryo 37.F2	empty cell. frag.	0																								1
Embryo 37.F3	empty cell. frag.	0																								1
Embryo 37.F4	empty cell. frag.	0																								1
Embryo 37.F6	No WGA	0																								1
Embryo 37.F7	empty cell. frag.	0																								1
Embryo 37.PB1	polar body	0																								1	Euploid polar body
Embryo 37.PB2	polar body	0																								1	Euploid polar body
Embryo 38.B1	blastomere	0																								1	Euploid XY
Embryo 38.B2	blastomere	0																								1	Euploid XY
Embryo 38.F2	empty cell. frag.	0																								1
Embryo 38.F4	No WGA	0																								1
Embryo 38.F5	No WGA	0																								1
Embryo 38.PB1	polar body	0																								1	Euploid polar body
Embryo 38.PB2	polar body	2																1			1			2		1	Aneuploid polar body
Embryo 39.B1	blastomere	0																								2	Chaotic aneuploid
Embryo 39.B2	blastomere	0																								2	Chaotic aneuploid
Embryo 39.B3	blastomere	0																								2	Chaotic aneuploid
Embryo 39.F1	No WGA	0																								2
Embryo 39.F2	empty cell. frag.	0																								2
Embryo 39.F3	empty cell. frag.	0																								2
Embryo 39.F5	empty cell. frag.	0																								2
Embryo 39.F6	empty cell. frag.	0																								2
Embryo 39.PB1	polar body	2			1			1																2		2	Aneuploid polar body
Embryo 40.B1	blastomere	0																								2	Chaotic aneuploid
Embryo 40.B2	blastomere	0																								2	Chaotic aneuploid
Embryo 40.PB1	polar body	2						1								1									2	2	Aneuploid polar body
Embryo 41.B1	blastomere	0																								2	Chaotic aneuploid
Embryo 41.B2	No WGA	0																								2
Embryo 41.B3	blastomere	0																								2	Chaotic aneuploid
Embryo 41.B4	blastomere	0																								2	Chaotic aneuploid
Embryo 41.PB1	Polar body	0																								2	Chaotic aneuploid polar body
Embryo 42.B1	blastomere	0																								2	Chaotic aneuploid
Embryo 42.B2	blastomere	0																								2	Chaotic aneuploid
Embryo 42.B3	blastomere	0																								2	Chaotic aneuploid
Embryo 42.B4	blastomere	0																								2	Chaotic aneuploid
Embryo 42.B5	blastomere	0																								2	Chaotic aneuploid
Embryo 42.F1	empty cell. frag.	0																								2
Embryo 43.B1	blastomere	0																								1	Euploid XX
Embryo 43.B2	blastomere	1																					1	1		1	Aneuploid XO
Embryo 43.B3	blastomere	1																					1	1		1	Aneuploid XXX
Embryo 43.B4	blastomere	0																								1	Euploid XX
Embryo 43.F3	empty cell. frag.	0																								1
Embryo 43.F4	empty cell. frag.	0																								1
Embryo 43.F5	empty cell. frag.	0																								1
Embryo 43.F6	empty cell. frag.	0																								1
Embryo 43.F7	empty cell. frag.	0																								1
Embryo 43.F8	empty cell. frag.	0																								1
Embryo 43.F9	empty cell. frag.	0																								1
Embryo 43.PB1	polar body	0																								1	Euploid polar body
Embryo 43.X2	empty cell. frag.	0																								1
Embryo 44.B1	empty blastomere	0																								1
Embryo 44.B2	blastomere	1																					1		1	1	Aneuploid XY; Segmental loss ChrX
Embryo 44.B3	blastomere	0																								1	Euploid XY
Embryo 44.B4	blastomere	1																					1		1	1	Aneuploid XY; Segmental gain ChrX
Embryo 44.B5	blastomere	0																								1	Euploid XY
Embryo 44.F2	empty cell. frag.	0																								1
Embryo 44.PB1	polar body	0																								1	Euploid polar body
Embryo 44.PB2	polar body	0																								1	Euploid polar body
Embryo 45.B2	blastomere	0																								1	Euploid XX
Embryo 45.B3	blastomere	0																								1	Chaotic aneuploid
Embryo 45.B4	blastomere	0																								1	Chaotic aneuploid
Embryo 45.X1	empty cell. frag.	0																								1
Embryo 46.B1	blastomere	0																								1	Euploid XY
Embryo 46.B2	blastomere	0																								1	Euploid XY
Embryo 46.B3	blastomere	0																								1	Euploid XY
Embryo 46.B4	blastomere	0																								1	Euploid XY
Embryo 46.PB1	polar body	2		1																	1			2		1	Aneuploid polar body
Embryo 46.PB2	polar body	0																								1	Euploid polar body
Embryo 47.B1	empty blastomere	0																								1
Embryo 47.B2	blastomere	1														1									1	1	Anueploid XY; Chr14 segmental loss
Embryo 47.B3	blastomere	0																								1	Euploid XY
Embryo 47.B4	blastomere	1														1									1	1	Anueploid XY; Chr14 segmental loss
Embryo 47.B5	blastomere	1														1									1	1	Anueploid XY; Chr14 segmental gain
Embryo 47.F1	empty cell. frag.	0																								1
Embryo 47.F2	empty cell. frag.	0																								1
Embryo 48.B1	blastomere	0																								1	Euploid XY
Embryo 48.B2	blastomere	0																								1	Chaotic aneuploid
Embryo 48.B3	blastomere	0																								1	Euploid XY
Embryo 48.B4	blastomere	1																			1			1		1	Aneuploid XY; Monosomy Chr19
Embryo 48.F1	empty cell. frag.	0																								1
Embryo 48.F2	empty cell. frag.	0																								1
Embryo 49.B1	blastomere	0																								1	Euploid XX
Embryo 49.B2	blastomere	2		1	1																			2		1	Aneuploid XX; Trisomy Chr2 & 3
Embryo 49.B3	blastomere	0																								1	Euploid XX.
Embryo 49.F1	empty cell. frag.	0																								1
Embryo 49.F2	empty cell. frag.	0																								1
Embryo 50.B8	blastomere	4	1	1									1							1				3	1	7	Aneuploid XY
Embryo 51.B1	No WGA	0																								7	Empty
Embryo 51.B4	blastomere	0																								7	Chaotic aneuploid
Embryo 52.B3	empty blastomere	0																								7	Empty
Embryo 52.B4	empty blastomere	0																								7	Empty
Embryo 53.B5	blastomere	0																								6	Chaotic aneuploid
Embryo 53.B6	blastomere	0																								6	Chaotic aneuploid
Embryo 54.B1	blastomere	0																								7	Chaotic aneuploid
Embryo 54.B14	blastomere	0																								7	Chaotic aneuploid
Embryo 54.B2	blastomere	0																								7	Chaotic aneuploid
Embryo 54.B3	blastomere	0																								7	Chaotic aneuploid
Embryo 55.B7	blastomere	2	1		1																			1		6	Aneuploid XX
Embryo 55.B8	blastomere	0																								6	Euploid XX
Embryo 56.B1	No WGA	0																								2
Embryo 56.B2	empty blastomere	0																								2
Embryo 56.F1	empty cell. frag.	0																								2
Embryo 56.F10	empty cell. frag.	0																								2
Embryo 56.F11	empty cell. frag.	0																								2
Embryo 56.F12	empty cell. frag.	0																								2
Embryo 56.F2	empty cell. frag.	0																								2
Embryo 56.F3	empty cell. frag.	0																								2
Embryo 56.F4	empty cell. frag.	0																								2
Embryo 56.F5	empty cell. frag.	0																								2
Embryo 56.F6	empty cell. frag.	0																								2
Embryo 56.F8	empty cell. frag.	0																								2
Embryo 56.F9	empty cell. frag.	0																								2
Embryo 56.PB1	polar body	1			1																				1	2	Aneuploid polar body
Embryo 57.ExB1	empty blastomere	0																								9
Embryo 57.ExB2	empty blastomere	0																								9
Embryo 57.ExB3	empty blastomere	0																								9
Embryo 57.ExB4	blastomere	0																								9	Chaotic aneuploid
Embryo 58.ExF1	empty cell. frag.	0																								7
Embryo 58.ExF10	empty cell. frag.	0																								7
Embryo 58.ExF11	empty cell. frag.	0																								7
Embryo 58.ExF12	empty cell. frag.	0																								7
Embryo 58.ExF13	empty cell. frag.	0																								7
Embryo 58.ExF2	empty cell. frag.	0																								7
Embryo 58.ExF3	empty cell. frag.	0																								7
Embryo 58.ExF4	empty cell. frag.	0																								7
Embryo 58.ExF5	empty cell. frag.	0																								7
Embryo 58.ExF6	empty cell. frag.	0																								7
Embryo 58.ExF7	empty cell. frag.	0																								7
Embryo 58.ExF8	empty cell. frag.	0																								7
Embryo 58.ExF9	empty cell. frag.	0																								7
	SUM	162	12	15	8	6	9	3	5	8	6	8	4	9	1	11	8	7	2	4	23	1	12	96	54

## Sheet: Supplemental_Table_S3
IVF Experiment	Maternal ID	Paternal ID	# of Embryos Sequenced	Failed Amp.	Euploid	Aneuploid	Chaotic Aneuploid	Euploid-Aneuploid Mosaicism	Embs. w/ Euploid PB(s)	Embs. w/ Aneuploid PB(s)	Embs. w/ Euploid & Aneuploid PBs	Meiotic Origin of Aneuploid Blastomeres	Mitotic Origin of Aneuploid Blastomeres
Experiment 1	29597	24519	1	0	0	0	0	1	0	0	0	0	0
Experiment 2	23959	24583	2	0	0	0	1	1	1	1	0	1	1
Experiment 3	26129	28281	1	0	0	0	1	0	0	0	0	0	0
Experiment 4	28797	24583	5	0	2	0	0	3	4	0	0	0	3
Experiment 5*	26406	26028	6	1	0	1	3	1	ND*	ND*	ND*	ND*	ND*
Experiment 6	22644	26028	2	0	0	1	0	1	1	0	0	0	1
Experiment 7	25710	24583	6	1	0	2	0	3	2	0	0	1	1
Experiment 8	25194	26028	4	0	0	1	3	0	0	1	0	1	0
Experiment 9	25490	26028	4	0	0	0	4	0	0	2	0	2	0
Experiment 10	29328	26848	1	0	1	0	0	0	1	0	0	0	0
Experiment 11	25636	26848	2	0	2	0	0	0	2	0	0	0	0
Experiment 12	24903	24583	7	0	4	1	1	1	6	1	0	1	2
Experiment 13	26406	26848	4	0	3	1	0	0	3	0	1	0	1
Experiment 14	25567	26028	4	0	0	0	4	0	0	3	0	3	0
Experiment 15*	25710	24583	1	1	0	0	0	0	ND*	ND*	ND*	ND*	ND*
Experiment 16*	26658	26848	1	0	0	0	1	0	ND*	ND*	ND*	ND*	ND*
Experiment 17	28797	26848	7	0	1	0	0	6	2	0	0	0	6
		Total	58	3	13	7	18	17	22	8	1	9	15

## Sheet: Supplemental_Table_S4
Animal ID	Mean Read Length	Total Reads Passed Filter	Reads Aligned	Reads Aligned (>Q20)	Read Pairs Examined	Mean Coverage	Read Pair Duplicates	Unmapped Reads
22644	131.308	152519444	151769087	136631050	75692919	4.58264	8787468	750357
24583	131.545	164587184	164008133	146846555	81843063	4.66073	8768843	579051
24903	128.5	132738536	131861784	118223444	65661276	4.05	6563710	876752
25194	129.897	155956910	155294881	139233975	77457485	4.59857	7360273	662029
25490	130.302	176384728	175662073	157576278	87616848	5.16113	7610950	722655
25567	129.359	176259136	175231491	157708051	87341792	5.26192	11208953	1027645
25636	128.469	148610204	147705007	132762078	73589594	4.53174	8059531	905197
25710	128.075	158407382	157827497	141477847	78754441	4.52742	6651907	579885
26028	131.248	150982386	150412582	135012102	75053571	4.4447	7294153	569804
26129	58.3982	349858846	338264426	264314367	169132213	2.25	8774583	11594420
26406	124.753	136790818	135899275	121598422	67699327	4.10734	6316174	891543
26848	130.518	139257912	138561730	124601408	69100847	4.17706	8160654	696182
28281	128.185	152011036	150985666	135116522	75162467	4.59911	7928321	1025370
28797	131.059	168020542	167378344	150071422	83501333	4.72209	9022048	642198
29328	129.597	136228758	135474684	122156677	67528622	4.20651	6442782	754074

## Sheet: Supplemental_Table_S5
Sample Name	Sample Type	Chr	Maternal ID	Maternal Count	Paternal ID	Paternal Count	Total Count	% Maternal (M)	% Paternal (P)	(M) Binomial Cumulative	(P) Binomial Cumulative	(M) BF Binomial Cumulative (0.05/213)	(p) BF Binomial Cumulative (0.05/213)	Cell Division	CNV Analysis	Embryo Ploidy
Embryo 10.B2	B	Chr1	22644	73	26028	37	110	0.663636	0.336364	0.999814	0.000384493	-	-	Multipolar	aneuploid	biparental
Embryo 10.B2	B	Chr2	22644	66	26028	34	100	0.66	0.34	0.999563	0.000894965	-	-	Multipolar	aneuploid	biparental
Embryo 10.B2	B	Chr3	22644	62	26028	65	127	0.488189	0.511811	0.429614	0.638606	-	-	Multipolar	aneuploid	biparental
Embryo 10.B2	B	Chr4	22644	58	26028	38	96	0.604167	0.395833	0.984226	0.0259553	-	-	Multipolar	aneuploid	biparental
Embryo 10.B2	B	Chr5	22644	32	26028	34	66	0.484848	0.515152	0.451079	0.643885	-	-	Multipolar	aneuploid	biparental
Embryo 10.B2	B	Chr6	22644	79	26028	38	117	0.675214	0.324786	0.999956	9.46513e-05	-	-	Multipolar	aneuploid	biparental
Embryo 10.B2	B	Chr7	22644	48	26028	35	83	0.578313	0.421687	0.938073	0.0937299	-	-	Multipolar	aneuploid	biparental
Embryo 10.B2	B	Chr8	22644	22	26028	9	31	0.709677	0.290323	0.994663	0.0147247	-	-	Multipolar	aneuploid	biparental
Embryo 10.B2	B	Chr9	22644	32	26028	19	51	0.627451	0.372549	0.975563	0.0459573	-	-	Multipolar	aneuploid	biparental
Embryo 10.B2	B	Chr10	22644	26	26028	11	37	0.702703	0.297297	0.996184	0.0100369	-	-	Multipolar	aneuploid	biparental
Embryo 10.B2	B	Chr11	22644	26	26028	22	48	0.541667	0.458333	0.76456	0.332733	-	-	Multipolar	aneuploid	biparental
Embryo 10.B2	B	Chr12	22644	45	26028	37	82	0.54878	0.45122	0.839853	0.219853	-	-	Multipolar	aneuploid	biparental
Embryo 10.B2	B	Chr13	22644	29	26028	25	54	0.537037	0.462963	0.751691	0.341745	-	-	Multipolar	aneuploid	biparental
Embryo 10.B2	B	Chr14	22644	40	26028	29	69	0.57971	0.42029	0.925984	0.1142	-	-	Multipolar	aneuploid	biparental
Embryo 10.B2	B	Chr15	22644	16	26028	15	31	0.516129	0.483871	0.63995	0.5	-	-	Multipolar	aneuploid	biparental
Embryo 10.B2	B	Chr16	22644	26	26028	15	41	0.634146	0.365854	0.970208	0.0586376	-	-	Multipolar	aneuploid	biparental
Embryo 10.B2	B	Chr17	22644	16	26028	18	34	0.470588	0.529412	0.432083	0.696204	-	-	Multipolar	aneuploid	biparental
Embryo 10.B2	B	Chr18	22644	31	26028	23	54	0.574074	0.425926	0.889836	0.170445	-	-	Multipolar	aneuploid	biparental
Embryo 10.B2	B	Chr19	22644	15	26028	11	26	0.576923	0.423077	0.83653	0.278599	-	-	Multipolar	aneuploid	biparental
Embryo 10.B2	B	Chr20	22644	32	26028	14	46	0.695652	0.304348	0.997733	0.0056758	-	-	Multipolar	aneuploid	biparental
Embryo 10.B2	B	ChrUn	22644	8	26028	3	11	0.727273	0.272727	0.967285	0.113281	-	-	Multipolar	aneuploid	biparental
Embryo 10.B2	B	ChrX	22644	18	26028	5	23	0.782609	0.217391	0.9987	0.00531101	-	-	Multipolar	aneuploid	biparental
Embryo 10.B3	B	Chr1	22644	94	26028	64	158	0.594937	0.405063	0.993299	0.0103769	-	-	Multipolar	aneuploid	biparental
Embryo 10.B3	B	Chr2	22644	7	26028	26	33	0.212121	0.787879	0.000659364	0.999838	-	-	Multipolar	aneuploid	biparental
Embryo 10.B3	B	Chr3	22644	30	26028	29	59	0.508475	0.491525	0.602578	0.5	-	-	Multipolar	aneuploid	biparental
Embryo 10.B3	B	Chr4	22644	43	26028	24	67	0.641791	0.358209	0.993033	0.01356	-	-	Multipolar	aneuploid	biparental
Embryo 10.B3	B	Chr5	22644	26	26028	27	53	0.490566	0.509434	0.5	0.608077	-	-	Multipolar	aneuploid	biparental
Embryo 10.B3	B	Chr6	22644	27	26028	25	52	0.519231	0.480769	0.661096	0.444942	-	-	Multipolar	aneuploid	biparental
Embryo 10.B3	B	Chr7	22644	35	26028	33	68	0.514706	0.485294	0.64185	0.451799	-	-	Multipolar	aneuploid	biparental
Embryo 10.B3	B	Chr8	22644	31	26028	58	89	0.348315	0.651685	0.00277248	0.998607	-	-	Multipolar	aneuploid	biparental
Embryo 10.B3	B	Chr9	22644	24	26028	22	46	0.521739	0.478261	0.670631	0.441498	-	-	Multipolar	aneuploid	biparental
Embryo 10.B3	B	Chr10	22644	26	26028	23	49	0.530612	0.469388	0.715914	0.387725	-	-	Multipolar	aneuploid	biparental
Embryo 10.B3	B	Chr11	22644	17	26028	11	28	0.607143	0.392857	0.907533	0.172464	-	-	Multipolar	aneuploid	biparental
Embryo 10.B3	B	Chr12	22644	59	26028	34	93	0.634409	0.365591	0.996652	0.0062003	-	-	Multipolar	aneuploid	biparental
Embryo 10.B3	B	Chr13	22644	17	26028	14	31	0.548387	0.451613	0.763435	0.36005	-	-	Multipolar	aneuploid	biparental
Embryo 10.B3	B	Chr14	22644	26	26028	35	61	0.42623	0.57377	0.152839	0.899984	-	-	Multipolar	aneuploid	biparental
Embryo 10.B3	B	Chr15	22644	13	26028	22	35	0.371429	0.628571	0.0877326	0.955234	-	-	Multipolar	aneuploid	biparental
Embryo 10.B3	B	Chr16	22644	26	26028	31	57	0.45614	0.54386	0.298321	0.786479	-	-	Multipolar	aneuploid	biparental
Embryo 10.B3	B	Chr17	22644	6	26028	14	20	0.3	0.7	0.0576591	0.979305	-	-	Multipolar	aneuploid	biparental
Embryo 10.B3	B	Chr18	22644	20	26028	19	39	0.512821	0.487179	0.625371	0.5	-	-	Multipolar	aneuploid	biparental
Embryo 10.B3	B	Chr19	22644	15	26028	16	31	0.483871	0.516129	0.5	0.63995	-	-	Multipolar	aneuploid	biparental
Embryo 10.B3	B	Chr20	22644	31	26028	14	45	0.688889	0.311111	0.996696	0.00804718	-	-	Multipolar	aneuploid	biparental
Embryo 10.B3	B	ChrUn	22644	3	26028	5	8	0.375	0.625	0.363281	0.855469	-	-	Multipolar	aneuploid	biparental
Embryo 10.B3	B	ChrX	22644	9	26028	2	11	0.818182	0.181818	0.994141	0.0327148	-	-	Multipolar	aneuploid	biparental
Embryo 11.B1	B	Chr1	22644	66	26028	57	123	0.536585	0.463415	0.816352	0.235425	-	-	Bipolar	euploid-aneuploid mosaic	mixoploid: gynogenetic & biparental blastomere(s)
Embryo 11.B1	B	Chr2	22644	49	26028	49	98	0.5	0.5	0.540197	0.540197	-	-	Bipolar	euploid-aneuploid mosaic	mixoploid: gynogenetic & biparental blastomere(s)
Embryo 11.B1	B	Chr3	22644	35	26028	40	75	0.466667	0.533333	0.322232	0.755659	-	-	Bipolar	euploid-aneuploid mosaic	mixoploid: gynogenetic & biparental blastomere(s)
Embryo 11.B1	B	Chr4	22644	57	26028	53	110	0.518182	0.481818	0.683122	0.387501	-	-	Bipolar	euploid-aneuploid mosaic	mixoploid: gynogenetic & biparental blastomere(s)
Embryo 11.B1	B	Chr5	22644	30	26028	20	50	0.6	0.4	0.94054	0.101319	-	-	Bipolar	euploid-aneuploid mosaic	mixoploid: gynogenetic & biparental blastomere(s)
Embryo 11.B1	B	Chr6	22644	43	26028	46	89	0.483146	0.516854	0.416129	0.664096	-	-	Bipolar	euploid-aneuploid mosaic	mixoploid: gynogenetic & biparental blastomere(s)
Embryo 11.B1	B	Chr7	22644	45	26028	41	86	0.523256	0.476744	0.704982	0.373267	-	-	Bipolar	euploid-aneuploid mosaic	mixoploid: gynogenetic & biparental blastomere(s)
Embryo 11.B1	B	Chr8	22644	22	26028	19	41	0.536585	0.463415	0.733645	0.377614	-	-	Bipolar	euploid-aneuploid mosaic	mixoploid: gynogenetic & biparental blastomere(s)
Embryo 11.B1	B	Chr9	22644	32	26028	37	69	0.463768	0.536232	0.315228	0.764816	-	-	Bipolar	euploid-aneuploid mosaic	mixoploid: gynogenetic & biparental blastomere(s)
Embryo 11.B1	B	Chr10	22644	30	26028	30	60	0.5	0.5	0.551289	0.551289	-	-	Bipolar	euploid-aneuploid mosaic	mixoploid: gynogenetic & biparental blastomere(s)
Embryo 11.B1	B	Chr11	22644	21	26028	19	40	0.525	0.475	0.682086	0.437315	-	-	Bipolar	euploid-aneuploid mosaic	mixoploid: gynogenetic & biparental blastomere(s)
Embryo 11.B1	B	Chr12	22644	31	26028	38	69	0.449275	0.550725	0.235184	0.832221	-	-	Bipolar	euploid-aneuploid mosaic	mixoploid: gynogenetic & biparental blastomere(s)
Embryo 11.B1	B	Chr13	22644	16	26028	24	40	0.4	0.6	0.134094	0.92307	-	-	Bipolar	euploid-aneuploid mosaic	mixoploid: gynogenetic & biparental blastomere(s)
Embryo 11.B1	B	Chr14	22644	41	26028	14	55	0.745455	0.254545	0.999943	0.000177641	-	-	Bipolar	euploid-aneuploid mosaic	mixoploid: gynogenetic & biparental blastomere(s)
Embryo 11.B1	B	Chr15	22644	28	26028	25	53	0.528302	0.471698	0.708434	0.391923	-	-	Bipolar	euploid-aneuploid mosaic	mixoploid: gynogenetic & biparental blastomere(s)
Embryo 11.B1	B	Chr16	22644	22	26028	13	35	0.628571	0.371429	0.955234	0.0877326	-	-	Bipolar	euploid-aneuploid mosaic	mixoploid: gynogenetic & biparental blastomere(s)
Embryo 11.B1	B	Chr17	22644	15	26028	11	26	0.576923	0.423077	0.83653	0.278599	-	-	Bipolar	euploid-aneuploid mosaic	mixoploid: gynogenetic & biparental blastomere(s)
Embryo 11.B1	B	Chr18	22644	16	26028	19	35	0.457143	0.542857	0.367939	0.75022	-	-	Bipolar	euploid-aneuploid mosaic	mixoploid: gynogenetic & biparental blastomere(s)
Embryo 11.B1	B	Chr19	22644	12	26028	20	32	0.375	0.625	0.107664	0.944908	-	-	Bipolar	euploid-aneuploid mosaic	mixoploid: gynogenetic & biparental blastomere(s)
Embryo 11.B1	B	Chr20	22644	27	26028	16	43	0.627907	0.372093	0.967003	0.0631447	-	-	Bipolar	euploid-aneuploid mosaic	mixoploid: gynogenetic & biparental blastomere(s)
Embryo 11.B1	B	ChrUn	22644	13	26028	4	17	0.764706	0.235294	0.993637	0.0245209	-	-	Bipolar	euploid-aneuploid mosaic	mixoploid: gynogenetic & biparental blastomere(s)
Embryo 11.B1	B	ChrX	22644	26	26028	21	47	0.553191	0.446809	0.809153	0.280032	-	-	Bipolar	euploid-aneuploid mosaic	mixoploid: gynogenetic & biparental blastomere(s)
Embryo 11.B3	B	Chr1	22644	136	26028	21	157	0.866242	0.133758	1	4.04919e-22	-	sig	Bipolar	euploid-aneuploid mosaic	mixoploid: gynogenetic & biparental blastomere(s)
Embryo 11.B3	B	Chr2	22644	91	26028	14	105	0.866667	0.133333	1	2.66101e-15	-	sig	Bipolar	euploid-aneuploid mosaic	mixoploid: gynogenetic & biparental blastomere(s)
Embryo 11.B3	B	Chr3	22644	79	26028	17	96	0.822917	0.177083	1	4.97076e-11	-	sig	Bipolar	euploid-aneuploid mosaic	mixoploid: gynogenetic & biparental blastomere(s)
Embryo 11.B3	B	Chr4	22644	88	26028	27	115	0.765217	0.234783	1	4.96281e-09	-	sig	Bipolar	euploid-aneuploid mosaic	mixoploid: gynogenetic & biparental blastomere(s)
Embryo 11.B3	B	Chr5	22644	49	26028	28	77	0.636364	0.363636	0.994164	0.0110167	-	-	Bipolar	euploid-aneuploid mosaic	mixoploid: gynogenetic & biparental blastomere(s)
Embryo 11.B3	B	Chr6	22644	64	26028	19	83	0.771084	0.228916	1	3.69577e-07	-	sig	Bipolar	euploid-aneuploid mosaic	mixoploid: gynogenetic & biparental blastomere(s)
Embryo 11.B3	B	Chr7	22644	87	26028	18	105	0.828571	0.171429	1	2.47313e-12	-	sig	Bipolar	euploid-aneuploid mosaic	mixoploid: gynogenetic & biparental blastomere(s)
Embryo 11.B3	B	Chr8	22644	51	26028	12	63	0.809524	0.190476	1	3.72986e-07	-	sig	Bipolar	euploid-aneuploid mosaic	mixoploid: gynogenetic & biparental blastomere(s)
Embryo 11.B3	B	Chr9	22644	71	26028	17	88	0.806818	0.193182	1	2.57698e-09	-	sig	Bipolar	euploid-aneuploid mosaic	mixoploid: gynogenetic & biparental blastomere(s)
Embryo 11.B3	B	Chr10	22644	67	26028	15	82	0.817073	0.182927	1	2.62866e-09	-	sig	Bipolar	euploid-aneuploid mosaic	mixoploid: gynogenetic & biparental blastomere(s)
Embryo 11.B3	B	Chr11	22644	45	26028	11	56	0.803571	0.196429	0.999999	2.68916e-06	-	sig	Bipolar	euploid-aneuploid mosaic	mixoploid: gynogenetic & biparental blastomere(s)
Embryo 11.B3	B	Chr12	22644	80	26028	17	97	0.824742	0.175258	1	3.00398e-11	-	sig	Bipolar	euploid-aneuploid mosaic	mixoploid: gynogenetic & biparental blastomere(s)
Embryo 11.B3	B	Chr13	22644	42	26028	11	53	0.792453	0.207547	0.999997	1.12378e-05	-	-	Bipolar	euploid-aneuploid mosaic	mixoploid: gynogenetic & biparental blastomere(s)
Embryo 11.B3	B	Chr14	22644	82	26028	17	99	0.828283	0.171717	1	1.09032e-11	-	sig	Bipolar	euploid-aneuploid mosaic	mixoploid: gynogenetic & biparental blastomere(s)
Embryo 11.B3	B	Chr15	22644	38	26028	13	51	0.745098	0.254902	0.999901	0.000310522	-	-	Bipolar	euploid-aneuploid mosaic	mixoploid: gynogenetic & biparental blastomere(s)
Embryo 11.B3	B	Chr16	22644	41	26028	12	53	0.773585	0.226415	0.999989	4.08567e-05	-	-	Bipolar	euploid-aneuploid mosaic	mixoploid: gynogenetic & biparental blastomere(s)
Embryo 11.B3	B	Chr17	22644	31	26028	9	40	0.775	0.225	0.999909	0.000339774	-	-	Bipolar	euploid-aneuploid mosaic	mixoploid: gynogenetic & biparental blastomere(s)
Embryo 11.B3	B	Chr18	22644	39	26028	13	52	0.75	0.25	0.999936	0.000204771	-	-	Bipolar	euploid-aneuploid mosaic	mixoploid: gynogenetic & biparental blastomere(s)
Embryo 11.B3	B	Chr19	22644	35	26028	7	42	0.833333	0.166667	0.999999	7.5486e-06	-	sig	Bipolar	euploid-aneuploid mosaic	mixoploid: gynogenetic & biparental blastomere(s)
Embryo 11.B3	B	Chr20	22644	59	26028	13	72	0.819444	0.180556	1	1.9043e-08	-	sig	Bipolar	euploid-aneuploid mosaic	mixoploid: gynogenetic & biparental blastomere(s)
Embryo 11.B3	B	ChrUn	22644	14	26028	3	17	0.823529	0.176471	0.998825	0.00636292	-	-	Bipolar	euploid-aneuploid mosaic	mixoploid: gynogenetic & biparental blastomere(s)
Embryo 11.B3	B	ChrX	22644	50	26028	2	52	0.961538	0.0384615	1	3.062e-13	-	sig	Bipolar	euploid-aneuploid mosaic	mixoploid: gynogenetic & biparental blastomere(s)
Embryo 11.B4	B	Chr1	22644	78	26028	15	93	0.83871	0.16129	1	9.69655e-12	-	sig	Bipolar	euploid-aneuploid mosaic	mixoploid: gynogenetic & biparental blastomere(s)
Embryo 11.B4	B	Chr2	22644	58	26028	15	73	0.794521	0.205479	1	2.0466e-07	-	sig	Bipolar	euploid-aneuploid mosaic	mixoploid: gynogenetic & biparental blastomere(s)
Embryo 11.B4	B	Chr3	22644	55	26028	14	69	0.797101	0.202899	1	3.46096e-07	-	sig	Bipolar	euploid-aneuploid mosaic	mixoploid: gynogenetic & biparental blastomere(s)
Embryo 11.B4	B	Chr4	22644	48	26028	11	59	0.813559	0.186441	1	6.20814e-07	-	sig	Bipolar	euploid-aneuploid mosaic	mixoploid: gynogenetic & biparental blastomere(s)
Embryo 11.B4	B	Chr5	22644	41	26028	13	54	0.759259	0.240741	0.999974	8.75634e-05	-	-	Bipolar	euploid-aneuploid mosaic	mixoploid: gynogenetic & biparental blastomere(s)
Embryo 11.B4	B	Chr6	22644	59	26028	22	81	0.728395	0.271605	0.999992	2.38492e-05	-	-	Bipolar	euploid-aneuploid mosaic	mixoploid: gynogenetic & biparental blastomere(s)
Embryo 11.B4	B	Chr7	22644	57	26028	10	67	0.850746	0.149254	1	2.02105e-09	-	sig	Bipolar	euploid-aneuploid mosaic	mixoploid: gynogenetic & biparental blastomere(s)
Embryo 11.B4	B	Chr8	22644	45	26028	12	57	0.789474	0.210526	0.999998	6.56372e-06	-	sig	Bipolar	euploid-aneuploid mosaic	mixoploid: gynogenetic & biparental blastomere(s)
Embryo 11.B4	B	Chr9	22644	59	26028	9	68	0.867647	0.132353	1	1.95706e-10	-	sig	Bipolar	euploid-aneuploid mosaic	mixoploid: gynogenetic & biparental blastomere(s)
Embryo 11.B4	B	Chr10	22644	56	26028	12	68	0.823529	0.176471	1	3.10475e-08	-	sig	Bipolar	euploid-aneuploid mosaic	mixoploid: gynogenetic & biparental blastomere(s)
Embryo 11.B4	B	Chr11	22644	26	26028	15	41	0.634146	0.365854	0.970208	0.0586376	-	-	Bipolar	euploid-aneuploid mosaic	mixoploid: gynogenetic & biparental blastomere(s)
Embryo 11.B4	B	Chr12	22644	59	26028	20	79	0.746835	0.253165	0.999998	6.48354e-06	-	sig	Bipolar	euploid-aneuploid mosaic	mixoploid: gynogenetic & biparental blastomere(s)
Embryo 11.B4	B	Chr13	22644	36	26028	14	50	0.72	0.28	0.999532	0.00130109	-	-	Bipolar	euploid-aneuploid mosaic	mixoploid: gynogenetic & biparental blastomere(s)
Embryo 11.B4	B	Chr14	22644	66	26028	13	79	0.835443	0.164557	1	5.39072e-10	-	sig	Bipolar	euploid-aneuploid mosaic	mixoploid: gynogenetic & biparental blastomere(s)
Embryo 11.B4	B	Chr15	22644	35	26028	8	43	0.813953	0.186047	0.999996	2.09671e-05	-	-	Bipolar	euploid-aneuploid mosaic	mixoploid: gynogenetic & biparental blastomere(s)
Embryo 11.B4	B	Chr16	22644	26	26028	9	35	0.742857	0.257143	0.999061	0.00299406	-	-	Bipolar	euploid-aneuploid mosaic	mixoploid: gynogenetic & biparental blastomere(s)
Embryo 11.B4	B	Chr17	22644	11	26028	9	20	0.55	0.45	0.748278	0.411901	-	-	Bipolar	euploid-aneuploid mosaic	mixoploid: gynogenetic & biparental blastomere(s)
Embryo 11.B4	B	Chr18	22644	34	26028	8	42	0.809524	0.190476	0.999992	3.43856e-05	-	-	Bipolar	euploid-aneuploid mosaic	mixoploid: gynogenetic & biparental blastomere(s)
Embryo 11.B4	B	Chr19	22644	24	26028	6	30	0.8	0.2	0.999838	0.000715453	-	-	Bipolar	euploid-aneuploid mosaic	mixoploid: gynogenetic & biparental blastomere(s)
Embryo 11.B4	B	Chr20	22644	42	26028	15	57	0.736842	0.263158	0.999923	0.000230003	-	-	Bipolar	euploid-aneuploid mosaic	mixoploid: gynogenetic & biparental blastomere(s)
Embryo 11.B4	B	ChrUn	22644	6	26028	0	6	1	0	1	0.015625	-	-	Bipolar	euploid-aneuploid mosaic	mixoploid: gynogenetic & biparental blastomere(s)
Embryo 11.B4	B	ChrX	22644	30	26028	8	38	0.789474	0.210526	0.999942	0.000235993	-	-	Bipolar	euploid-aneuploid mosaic	mixoploid: gynogenetic & biparental blastomere(s)
Embryo 11.B5	B	Chr1	22644	252	26028	178	430	0.586047	0.413953	0.999856	0.000209177	-	-	Bipolar	euploid-aneuploid mosaic	mixoploid: gynogenetic & biparental blastomere(s)
Embryo 11.B5	B	Chr2	22644	175	26028	174	349	0.501433	0.498567	0.542618	0.5	-	-	Bipolar	euploid-aneuploid mosaic	mixoploid: gynogenetic & biparental blastomere(s)
Embryo 11.B5	B	Chr3	22644	150	26028	173	323	0.464396	0.535604	0.110425	0.909171	-	-	Bipolar	euploid-aneuploid mosaic	mixoploid: gynogenetic & biparental blastomere(s)
Embryo 11.B5	B	Chr4	22644	148	26028	167	315	0.469841	0.530159	0.155246	0.870119	-	-	Bipolar	euploid-aneuploid mosaic	mixoploid: gynogenetic & biparental blastomere(s)
Embryo 11.B5	B	Chr5	22644	128	26028	102	230	0.556522	0.443478	0.962603	0.0495248	-	-	Bipolar	euploid-aneuploid mosaic	mixoploid: gynogenetic & biparental blastomere(s)
Embryo 11.B5	B	Chr6	22644	120	26028	143	263	0.456274	0.543726	0.0874004	0.930625	-	-	Bipolar	euploid-aneuploid mosaic	mixoploid: gynogenetic & biparental blastomere(s)
Embryo 11.B5	B	Chr7	22644	213	26028	185	398	0.535176	0.464824	0.927024	0.0879284	-	-	Bipolar	euploid-aneuploid mosaic	mixoploid: gynogenetic & biparental blastomere(s)
Embryo 11.B5	B	Chr8	22644	104	26028	108	212	0.490566	0.509434	0.41841	0.634307	-	-	Bipolar	euploid-aneuploid mosaic	mixoploid: gynogenetic & biparental blastomere(s)
Embryo 11.B5	B	Chr9	22644	165	26028	124	289	0.570934	0.429066	0.993324	0.0092355	-	-	Bipolar	euploid-aneuploid mosaic	mixoploid: gynogenetic & biparental blastomere(s)
Embryo 11.B5	B	Chr10	22644	195	26028	132	327	0.59633	0.40367	0.999807	0.000292875	-	-	Bipolar	euploid-aneuploid mosaic	mixoploid: gynogenetic & biparental blastomere(s)
Embryo 11.B5	B	Chr11	22644	118	26028	114	232	0.508621	0.491379	0.628605	0.421956	-	-	Bipolar	euploid-aneuploid mosaic	mixoploid: gynogenetic & biparental blastomere(s)
Embryo 11.B5	B	Chr12	22644	116	26028	151	267	0.434457	0.565543	0.0186284	0.986302	-	-	Bipolar	euploid-aneuploid mosaic	mixoploid: gynogenetic & biparental blastomere(s)
Embryo 11.B5	B	Chr13	22644	113	26028	101	214	0.528037	0.471963	0.812887	0.226081	-	-	Bipolar	euploid-aneuploid mosaic	mixoploid: gynogenetic & biparental blastomere(s)
Embryo 11.B5	B	Chr14	22644	206	26028	164	370	0.556757	0.443243	0.987373	0.0164543	-	-	Bipolar	euploid-aneuploid mosaic	mixoploid: gynogenetic & biparental blastomere(s)
Embryo 11.B5	B	Chr15	22644	79	26028	102	181	0.436464	0.563536	0.0508665	0.962926	-	-	Bipolar	euploid-aneuploid mosaic	mixoploid: gynogenetic & biparental blastomere(s)
Embryo 11.B5	B	Chr16	22644	153	26028	97	250	0.612	0.388	0.999853	0.000240064	-	-	Bipolar	euploid-aneuploid mosaic	mixoploid: gynogenetic & biparental blastomere(s)
Embryo 11.B5	B	Chr17	22644	60	26028	59	119	0.504202	0.495798	0.572685	0.5	-	-	Bipolar	euploid-aneuploid mosaic	mixoploid: gynogenetic & biparental blastomere(s)
Embryo 11.B5	B	Chr18	22644	84	26028	81	165	0.509091	0.490909	0.622197	0.438165	-	-	Bipolar	euploid-aneuploid mosaic	mixoploid: gynogenetic & biparental blastomere(s)
Embryo 11.B5	B	Chr19	22644	103	26028	72	175	0.588571	0.411429	0.992338	0.0115341	-	-	Bipolar	euploid-aneuploid mosaic	mixoploid: gynogenetic & biparental blastomere(s)
Embryo 11.B5	B	Chr20	22644	114	26028	145	259	0.440154	0.559846	0.0310488	0.97672	-	-	Bipolar	euploid-aneuploid mosaic	mixoploid: gynogenetic & biparental blastomere(s)
Embryo 11.B5	B	ChrUn	22644	31	26028	25	56	0.553571	0.446429	0.825159	0.252202	-	-	Bipolar	euploid-aneuploid mosaic	mixoploid: gynogenetic & biparental blastomere(s)
Embryo 11.B5	B	ChrX	22644	73	26028	66	139	0.52518	0.47482	0.751218	0.305487	-	-	Bipolar	euploid-aneuploid mosaic	mixoploid: gynogenetic & biparental blastomere(s)
Embryo 11.PB1	PB	Chr1	22644	25	26028	2	27	0.925926	0.0740741	1	2.82377e-06	-	sig	Bipolar	euploid-aneuploid mosaic	mixoploid: gynogenetic & biparental blastomere(s)
Embryo 11.PB1	PB	Chr1	22644	70	26028	19	89	0.786517	0.213483	1	2.47874e-08	-	sig	Bipolar	euploid-aneuploid mosaic	mixoploid: gynogenetic & biparental blastomere(s)
Embryo 11.PB1	PB	Chr2	22644	20	26028	3	23	0.869565	0.130435	0.999967	0.000244141	-	-	Bipolar	euploid-aneuploid mosaic	mixoploid: gynogenetic & biparental blastomere(s)
Embryo 11.PB1	PB	Chr2	22644	47	26028	15	62	0.758065	0.241935	0.999991	2.88919e-05	-	-	Bipolar	euploid-aneuploid mosaic	mixoploid: gynogenetic & biparental blastomere(s)
Embryo 11.PB1	PB	Chr3	22644	10	26028	7	17	0.588235	0.411765	0.833847	0.314529	-	-	Bipolar	euploid-aneuploid mosaic	mixoploid: gynogenetic & biparental blastomere(s)
Embryo 11.PB1	PB	Chr3	22644	42	26028	10	52	0.807692	0.192308	0.999999	4.53164e-06	-	sig	Bipolar	euploid-aneuploid mosaic	mixoploid: gynogenetic & biparental blastomere(s)
Embryo 11.PB1	PB	Chr4	22644	12	26028	5	17	0.705882	0.294118	0.975479	0.0717316	-	-	Bipolar	euploid-aneuploid mosaic	mixoploid: gynogenetic & biparental blastomere(s)
Embryo 11.PB1	PB	Chr4	22644	42	26028	7	49	0.857143	0.142857	1	1.81229e-07	-	sig	Bipolar	euploid-aneuploid mosaic	mixoploid: gynogenetic & biparental blastomere(s)
Embryo 11.PB1	PB	Chr5	22644	9	26028	2	11	0.818182	0.181818	0.994141	0.0327148	-	-	Bipolar	euploid-aneuploid mosaic	mixoploid: gynogenetic & biparental blastomere(s)
Embryo 11.PB1	PB	Chr5	22644	32	26028	7	39	0.820513	0.179487	0.999993	3.51274e-05	-	-	Bipolar	euploid-aneuploid mosaic	mixoploid: gynogenetic & biparental blastomere(s)
Embryo 11.PB1	PB	Chr6	22644	8	26028	2	10	0.8	0.2	0.989258	0.0546875	-	-	Bipolar	euploid-aneuploid mosaic	mixoploid: gynogenetic & biparental blastomere(s)
Embryo 11.PB1	PB	Chr6	22644	33	26028	15	48	0.6875	0.3125	0.997242	0.00664164	-	-	Bipolar	euploid-aneuploid mosaic	mixoploid: gynogenetic & biparental blastomere(s)
Embryo 11.PB1	PB	Chr7	22644	16	26028	2	18	0.888889	0.111111	0.999928	0.000656128	-	-	Bipolar	euploid-aneuploid mosaic	mixoploid: gynogenetic & biparental blastomere(s)
Embryo 11.PB1	PB	Chr7	22644	50	26028	12	62	0.806452	0.193548	1	6.0719e-07	-	sig	Bipolar	euploid-aneuploid mosaic	mixoploid: gynogenetic & biparental blastomere(s)
Embryo 11.PB1	PB	Chr8	22644	3	26028	2	5	0.6	0.4	0.8125	0.5	-	-	Bipolar	euploid-aneuploid mosaic	mixoploid: gynogenetic & biparental blastomere(s)
Embryo 11.PB1	PB	Chr8	22644	24	26028	4	28	0.857143	0.142857	0.999986	8.99956e-05	-	-	Bipolar	euploid-aneuploid mosaic	mixoploid: gynogenetic & biparental blastomere(s)
Embryo 11.PB1	PB	Chr9	22644	14	26028	0	14	1	0	1	6.10352e-05	-	-	Bipolar	euploid-aneuploid mosaic	mixoploid: gynogenetic & biparental blastomere(s)
Embryo 11.PB1	PB	Chr9	22644	26	26028	7	33	0.787879	0.212121	0.999838	0.000659364	-	-	Bipolar	euploid-aneuploid mosaic	mixoploid: gynogenetic & biparental blastomere(s)
Embryo 11.PB1	PB	Chr10	22644	21	26028	5	26	0.807692	0.192308	0.999733	0.00124696	-	-	Bipolar	euploid-aneuploid mosaic	mixoploid: gynogenetic & biparental blastomere(s)
Embryo 11.PB1	PB	Chr10	22644	41	26028	6	47	0.87234	0.12766	1	8.85849e-08	-	sig	Bipolar	euploid-aneuploid mosaic	mixoploid: gynogenetic & biparental blastomere(s)
Embryo 11.PB1	PB	Chr11	22644	7	26028	3	10	0.7	0.3	0.945312	0.171875	-	-	Bipolar	euploid-aneuploid mosaic	mixoploid: gynogenetic & biparental blastomere(s)
Embryo 11.PB1	PB	Chr11	22644	19	26028	7	26	0.730769	0.269231	0.995322	0.0144796	-	-	Bipolar	euploid-aneuploid mosaic	mixoploid: gynogenetic & biparental blastomere(s)
Embryo 11.PB1	PB	Chr12	22644	12	26028	2	14	0.857143	0.142857	0.999084	0.00646973	-	-	Bipolar	euploid-aneuploid mosaic	mixoploid: gynogenetic & biparental blastomere(s)
Embryo 11.PB1	PB	Chr12	22644	29	26028	5	34	0.852941	0.147059	0.999997	1.92791e-05	-	-	Bipolar	euploid-aneuploid mosaic	mixoploid: gynogenetic & biparental blastomere(s)
Embryo 11.PB1	PB	Chr13	22644	7	26028	4	11	0.636364	0.363636	0.886719	0.274414	-	-	Bipolar	euploid-aneuploid mosaic	mixoploid: gynogenetic & biparental blastomere(s)
Embryo 11.PB1	PB	Chr13	22644	16	26028	2	18	0.888889	0.111111	0.999928	0.000656128	-	-	Bipolar	euploid-aneuploid mosaic	mixoploid: gynogenetic & biparental blastomere(s)
Embryo 11.PB1	PB	Chr14	22644	14	26028	2	16	0.875	0.125	0.999741	0.00209045	-	-	Bipolar	euploid-aneuploid mosaic	mixoploid: gynogenetic & biparental blastomere(s)
Embryo 11.PB1	PB	Chr14	22644	32	26028	9	41	0.780488	0.219512	0.999944	0.000215429	-	-	Bipolar	euploid-aneuploid mosaic	mixoploid: gynogenetic & biparental blastomere(s)
Embryo 11.PB1	PB	Chr15	22644	11	26028	3	14	0.785714	0.214286	0.99353	0.0286865	-	-	Bipolar	euploid-aneuploid mosaic	mixoploid: gynogenetic & biparental blastomere(s)
Embryo 11.PB1	PB	Chr15	22644	19	26028	2	21	0.904762	0.0952381	0.99999	0.000110626	-	-	Bipolar	euploid-aneuploid mosaic	mixoploid: gynogenetic & biparental blastomere(s)
Embryo 11.PB1	PB	Chr16	22644	10	26028	4	14	0.714286	0.285714	0.971313	0.0897827	-	-	Bipolar	euploid-aneuploid mosaic	mixoploid: gynogenetic & biparental blastomere(s)
Embryo 11.PB1	PB	Chr16	22644	10	26028	8	18	0.555556	0.444444	0.759659	0.407265	-	-	Bipolar	euploid-aneuploid mosaic	mixoploid: gynogenetic & biparental blastomere(s)
Embryo 11.PB1	PB	Chr17	22644	2	26028	3	5	0.4	0.6	0.5	0.8125	-	-	Bipolar	euploid-aneuploid mosaic	mixoploid: gynogenetic & biparental blastomere(s)
Embryo 11.PB1	PB	Chr17	22644	12	26028	6	18	0.666667	0.333333	0.951874	0.118942	-	-	Bipolar	euploid-aneuploid mosaic	mixoploid: gynogenetic & biparental blastomere(s)
Embryo 11.PB1	PB	Chr18	22644	6	26028	0	6	1	0	1	0.015625	-	-	Bipolar	euploid-aneuploid mosaic	mixoploid: gynogenetic & biparental blastomere(s)
Embryo 11.PB1	PB	Chr18	22644	22	26028	8	30	0.733333	0.266667	0.997389	0.0080624	-	-	Bipolar	euploid-aneuploid mosaic	mixoploid: gynogenetic & biparental blastomere(s)
Embryo 11.PB1	PB	Chr19	22644	11	26028	1	12	0.916667	0.0833333	0.999756	0.00317383	-	-	Bipolar	euploid-aneuploid mosaic	mixoploid: gynogenetic & biparental blastomere(s)
Embryo 11.PB1	PB	Chr19	22644	26	26028	3	29	0.896552	0.103448	0.999999	7.61822e-06	-	sig	Bipolar	euploid-aneuploid mosaic	mixoploid: gynogenetic & biparental blastomere(s)
Embryo 11.PB1	PB	Chr20	22644	7	26028	4	11	0.636364	0.363636	0.886719	0.274414	-	-	Bipolar	euploid-aneuploid mosaic	mixoploid: gynogenetic & biparental blastomere(s)
Embryo 11.PB1	PB	Chr20	22644	18	26028	7	25	0.72	0.28	0.992683	0.0216426	-	-	Bipolar	euploid-aneuploid mosaic	mixoploid: gynogenetic & biparental blastomere(s)
Embryo 11.PB1	PB	ChrUn	22644	4	26028	1	5	0.8	0.2	0.96875	0.1875	-	-	Bipolar	euploid-aneuploid mosaic	mixoploid: gynogenetic & biparental blastomere(s)
Embryo 11.PB1	PB	ChrUn	22644	5	26028	2	7	0.714286	0.285714	0.9375	0.226562	-	-	Bipolar	euploid-aneuploid mosaic	mixoploid: gynogenetic & biparental blastomere(s)
Embryo 11.PB1	PB	ChrX	22644	11	26028	0	11	1	0	1	0.000488281	-	-	Bipolar	euploid-aneuploid mosaic	mixoploid: gynogenetic & biparental blastomere(s)
Embryo 11.PB1	PB	ChrX	22644	27	26028	6	33	0.818182	0.181818	0.999967	0.000162032	-	-	Bipolar	euploid-aneuploid mosaic	mixoploid: gynogenetic & biparental blastomere(s)
Embryo 12.B1	B	Chr1	25710	523	24583	599	1122	0.466132	0.533868	0.0125544	0.989262	-	-	Multipolar	aneuploid	biparental
Embryo 12.B1	B	Chr2	25710	503	24583	500	1003	0.501496	0.498504	0.550249	0.474825	-	-	Multipolar	aneuploid	biparental
Embryo 12.B1	B	Chr3	25710	438	24583	445	883	0.496036	0.503964	0.419998	0.606111	-	-	Multipolar	aneuploid	biparental
Embryo 12.B1	B	Chr4	25710	471	24583	424	895	0.526257	0.473743	0.94572	0.0620481	-	-	Multipolar	aneuploid	biparental
Embryo 12.B1	B	Chr5	25710	370	24583	389	759	0.487484	0.512516	0.256776	0.766055	-	-	Multipolar	aneuploid	biparental
Embryo 12.B1	B	Chr6	25710	399	24583	428	827	0.482467	0.517533	0.165115	0.851575	-	-	Multipolar	aneuploid	biparental
Embryo 12.B1	B	Chr7	25710	421	24583	383	804	0.523632	0.476368	0.91552	0.0959491	-	-	Multipolar	aneuploid	biparental
Embryo 12.B1	B	Chr8	25710	386	24583	398	784	0.492347	0.507653	0.347226	0.678765	-	-	Multipolar	aneuploid	biparental
Embryo 12.B1	B	Chr9	25710	406	24583	395	801	0.506866	0.493134	0.664204	0.361932	-	-	Multipolar	aneuploid	biparental
Embryo 12.B1	B	Chr10	25710	279	24583	436	715	0.39021	0.60979	2.35753e-09	1	sig	-	Multipolar	aneuploid	biparental
Embryo 12.B1	B	Chr11	25710	288	24583	350	638	0.451411	0.548589	0.00783436	0.993718	-	-	Multipolar	aneuploid	biparental
Embryo 12.B1	B	Chr12	25710	326	24583	294	620	0.525806	0.474194	0.907488	0.106551	-	-	Multipolar	aneuploid	biparental
Embryo 12.B1	B	Chr13	25710	277	24583	302	579	0.478411	0.521589	0.159284	0.860051	-	-	Multipolar	aneuploid	biparental
Embryo 12.B1	B	Chr14	25710	271	24583	278	549	0.493625	0.506375	0.398961	0.633593	-	-	Multipolar	aneuploid	biparental
Embryo 12.B1	B	Chr15	25710	288	24583	311	599	0.480801	0.519199	0.184361	0.836607	-	-	Multipolar	aneuploid	biparental
Embryo 12.B1	B	Chr16	25710	193	24583	206	399	0.483709	0.516291	0.27403	0.758287	-	-	Multipolar	aneuploid	biparental
Embryo 12.B1	B	Chr17	25710	307	24583	272	579	0.530225	0.469775	0.932722	0.0787993	-	-	Multipolar	aneuploid	biparental
Embryo 12.B1	B	Chr18	25710	208	24583	221	429	0.484848	0.515152	0.281197	0.750434	-	-	Multipolar	aneuploid	biparental
Embryo 12.B1	B	Chr19	25710	135	24583	137	272	0.496324	0.503676	0.475833	0.572149	-	-	Multipolar	aneuploid	biparental
Embryo 12.B1	B	Chr20	25710	271	24583	230	501	0.540918	0.459082	0.969755	0.0369105	-	-	Multipolar	aneuploid	biparental
Embryo 12.B1	B	ChrUn	25710	95	24583	90	185	0.513514	0.486486	0.670382	0.384393	-	-	Multipolar	aneuploid	biparental
Embryo 12.B1	B	ChrX	25710	242	24583	62	304	0.796053	0.203947	1	1.41058e-26	-	sig	Multipolar	aneuploid	biparental
Embryo 12.B3	UNKN	Chr1	25710	714	24583	715	1429	0.49965	0.50035	0.5	0.521096	-	-	Multipolar	aneuploid	biparental
Embryo 12.B3	UNKN	Chr2	25710	655	24583	730	1385	0.472924	0.527076	0.0233634	0.979451	-	-	Multipolar	aneuploid	biparental
Embryo 12.B3	UNKN	Chr3	25710	584	24583	637	1221	0.478296	0.521704	0.06834	0.938891	-	-	Multipolar	aneuploid	biparental
Embryo 12.B3	UNKN	Chr4	25710	579	24583	583	1162	0.498279	0.501721	0.464938	0.558303	-	-	Multipolar	aneuploid	biparental
Embryo 12.B3	UNKN	Chr5	25710	586	24583	230	816	0.718137	0.281863	1	6.60623e-37	-	sig	Multipolar	aneuploid	biparental
Embryo 12.B3	UNKN	Chr6	25710	537	24583	569	1106	0.485533	0.514467	0.175633	0.83947	-	-	Multipolar	aneuploid	biparental
Embryo 12.B3	UNKN	Chr7	25710	497	24583	550	1047	0.47469	0.52531	0.0539992	0.952451	-	-	Multipolar	aneuploid	biparental
Embryo 12.B3	UNKN	Chr8	25710	500	24583	526	1026	0.487329	0.512671	0.217559	0.80036	-	-	Multipolar	aneuploid	biparental
Embryo 12.B3	UNKN	Chr9	25710	463	24583	460	923	0.501625	0.498375	0.552369	0.473759	-	-	Multipolar	aneuploid	biparental
Embryo 12.B3	UNKN	Chr10	25710	285	24583	88	373	0.764075	0.235925	1	1.15628e-25	-	sig	Multipolar	aneuploid	biparental
Embryo 12.B3	UNKN	Chr11	25710	405	24583	392	797	0.508156	0.491844	0.690006	0.335409	-	-	Multipolar	aneuploid	biparental
Embryo 12.B3	UNKN	Chr12	25710	369	24583	179	548	0.673358	0.326642	1	1.73038e-16	-	sig	Multipolar	aneuploid	biparental
Embryo 12.B3	UNKN	Chr13	25710	383	24583	400	783	0.489144	0.510856	0.283745	0.739962	-	-	Multipolar	aneuploid	biparental
Embryo 12.B3	UNKN	Chr14	25710	365	24583	411	776	0.470361	0.529639	0.0530812	0.95425	-	-	Multipolar	aneuploid	biparental
Embryo 12.B3	UNKN	Chr15	25710	88	24583	344	432	0.203704	0.796296	3.96564e-37	1	sig	-	Multipolar	aneuploid	biparental
Embryo 12.B3	UNKN	Chr16	25710	213	24583	208	421	0.505938	0.494062	0.614998	0.422731	-	-	Multipolar	aneuploid	biparental
Embryo 12.B3	UNKN	Chr17	25710	356	24583	382	738	0.482385	0.517615	0.178722	0.83986	-	-	Multipolar	aneuploid	biparental
Embryo 12.B3	UNKN	Chr18	25710	265	24583	250	515	0.514563	0.485437	0.759591	0.268666	-	-	Multipolar	aneuploid	biparental
Embryo 12.B3	UNKN	Chr19	25710	131	24583	108	239	0.548117	0.451883	0.939812	0.0772856	-	-	Multipolar	aneuploid	biparental
Embryo 12.B3	UNKN	Chr20	25710	311	24583	303	614	0.506515	0.493485	0.64176	0.388795	-	-	Multipolar	aneuploid	biparental
Embryo 12.B3	UNKN	ChrUn	25710	88	24583	95	183	0.480874	0.519126	0.328749	0.722807	-	-	Multipolar	aneuploid	biparental
Embryo 12.B3	UNKN	ChrX	25710	297	24583	63	360	0.825	0.175	1	9.46146e-38	-	sig	Multipolar	aneuploid	biparental
Embryo 12.B4	B	Chr1	25710	592	24583	687	1279	0.462862	0.537138	0.00427653	0.996378	-	-	Multipolar	aneuploid	biparental
Embryo 12.B4	B	Chr2	25710	486	24583	603	1089	0.446281	0.553719	0.000217227	0.999828	-	-	Multipolar	aneuploid	biparental
Embryo 12.B4	B	Chr3	25710	480	24583	541	1021	0.470127	0.529873	0.030181	0.973858	-	-	Multipolar	aneuploid	biparental
Embryo 12.B4	B	Chr4	25710	435	24583	431	866	0.502309	0.497691	0.567452	0.459404	-	-	Multipolar	aneuploid	biparental
Embryo 12.B4	B	Chr5	25710	381	24583	479	860	0.443023	0.556977	0.000465027	0.999637	-	-	Multipolar	aneuploid	biparental
Embryo 12.B4	B	Chr6	25710	394	24583	478	872	0.451835	0.548165	0.00245718	0.998015	-	-	Multipolar	aneuploid	biparental
Embryo 12.B4	B	Chr7	25710	410	24583	559	969	0.423117	0.576883	9.52007e-07	0.999999	sig	-	Multipolar	aneuploid	biparental
Embryo 12.B4	B	Chr8	25710	355	24583	422	777	0.456885	0.543115	0.00892031	0.992672	-	-	Multipolar	aneuploid	biparental
Embryo 12.B4	B	Chr9	25710	389	24583	463	852	0.456573	0.543427	0.00617073	0.994928	-	-	Multipolar	aneuploid	biparental
Embryo 12.B4	B	Chr10	25710	283	24583	247	530	0.533962	0.466038	0.946036	0.0641781	-	-	Multipolar	aneuploid	biparental
Embryo 12.B4	B	Chr11	25710	329	24583	390	719	0.45758	0.54242	0.0125889	0.989649	-	-	Multipolar	aneuploid	biparental
Embryo 12.B4	B	Chr12	25710	318	24583	365	683	0.465593	0.534407	0.0391537	0.96691	-	-	Multipolar	aneuploid	biparental
Embryo 12.B4	B	Chr13	25710	301	24583	327	628	0.479299	0.520701	0.159235	0.859358	-	-	Multipolar	aneuploid	biparental
Embryo 12.B4	B	Chr14	25710	308	24583	377	685	0.449635	0.550365	0.00466159	0.996281	-	-	Multipolar	aneuploid	biparental
Embryo 12.B4	B	Chr15	25710	418	24583	384	802	0.521197	0.478803	0.891763	0.121946	-	-	Multipolar	aneuploid	biparental
Embryo 12.B4	B	Chr16	25710	207	24583	281	488	0.42418	0.57582	0.00046615	0.999665	-	-	Multipolar	aneuploid	biparental
Embryo 12.B4	B	Chr17	25710	294	24583	317	611	0.481178	0.518822	0.186733	0.834208	-	-	Multipolar	aneuploid	biparental
Embryo 12.B4	B	Chr18	25710	217	24583	248	465	0.466667	0.533333	0.0820446	0.931133	-	-	Multipolar	aneuploid	biparental
Embryo 12.B4	B	Chr19	25710	160	24583	160	320	0.5	0.5	0.522284	0.522284	-	-	Multipolar	aneuploid	biparental
Embryo 12.B4	B	Chr20	25710	246	24583	289	535	0.459813	0.540187	0.0346492	0.971484	-	-	Multipolar	aneuploid	biparental
Embryo 12.B4	B	ChrUn	25710	115	24583	86	201	0.572139	0.427861	0.982959	0.0240007	-	-	Multipolar	aneuploid	biparental
Embryo 12.B4	B	ChrX	25710	234	24583	46	280	0.835714	0.164286	1	8.59253e-32	-	sig	Multipolar	aneuploid	biparental
Embryo 12.B6	B	Chr1	25710	812	24583	740	1552	0.523196	0.476804	0.968077	0.0357368	-	-	Multipolar	aneuploid	biparental
Embryo 12.B6	B	Chr2	25710	683	24583	650	1333	0.512378	0.487622	0.824135	0.190392	-	-	Multipolar	aneuploid	biparental
Embryo 12.B6	B	Chr3	25710	605	24583	591	1196	0.505853	0.494147	0.667751	0.353502	-	-	Multipolar	aneuploid	biparental
Embryo 12.B6	B	Chr4	25710	568	24583	534	1102	0.515426	0.484574	0.854136	0.160091	-	-	Multipolar	aneuploid	biparental
Embryo 12.B6	B	Chr5	25710	528	24583	565	1093	0.483074	0.516926	0.138093	0.874812	-	-	Multipolar	aneuploid	biparental
Embryo 12.B6	B	Chr6	25710	567	24583	584	1151	0.492615	0.507385	0.318612	0.702129	-	-	Multipolar	aneuploid	biparental
Embryo 12.B6	B	Chr7	25710	541	24583	514	1055	0.512796	0.487204	0.805665	0.211725	-	-	Multipolar	aneuploid	biparental
Embryo 12.B6	B	Chr8	25710	499	24583	477	976	0.51127	0.48873	0.76919	0.25074	-	-	Multipolar	aneuploid	biparental
Embryo 12.B6	B	Chr9	25710	517	24583	466	983	0.525941	0.474059	0.951421	0.0553605	-	-	Multipolar	aneuploid	biparental
Embryo 12.B6	B	Chr10	25710	334	24583	353	687	0.486172	0.513828	0.246136	0.777271	-	-	Multipolar	aneuploid	biparental
Embryo 12.B6	B	Chr11	25710	437	24583	444	881	0.496027	0.503973	0.419909	0.606229	-	-	Multipolar	aneuploid	biparental
Embryo 12.B6	B	Chr12	25710	442	24583	416	858	0.515152	0.484848	0.821671	0.196701	-	-	Multipolar	aneuploid	biparental
Embryo 12.B6	B	Chr13	25710	389	24583	346	735	0.529252	0.470748	0.947734	0.0606381	-	-	Multipolar	aneuploid	biparental
Embryo 12.B6	B	Chr14	25710	445	24583	378	823	0.540705	0.459295	0.991141	0.0106784	-	-	Multipolar	aneuploid	biparental
Embryo 12.B6	B	Chr15	25710	403	24583	392	795	0.506918	0.493082	0.664786	0.361433	-	-	Multipolar	aneuploid	biparental
Embryo 12.B6	B	Chr16	25710	317	24583	308	625	0.5072	0.4928	0.655405	0.374499	-	-	Multipolar	aneuploid	biparental
Embryo 12.B6	B	Chr17	25710	368	24583	378	746	0.493298	0.506702	0.370896	0.656416	-	-	Multipolar	aneuploid	biparental
Embryo 12.B6	B	Chr18	25710	318	24583	252	570	0.557895	0.442105	0.997516	0.00321396	-	-	Multipolar	aneuploid	biparental
Embryo 12.B6	B	Chr19	25710	220	24583	152	372	0.591398	0.408602	0.999833	0.000248375	-	-	Multipolar	aneuploid	biparental
Embryo 12.B6	B	Chr20	25710	385	24583	296	681	0.565345	0.434655	0.999723	0.000367108	-	-	Multipolar	aneuploid	biparental
Embryo 12.B6	B	ChrUn	25710	72	24583	83	155	0.464516	0.535484	0.210969	0.832432	-	-	Multipolar	aneuploid	biparental
Embryo 12.B6	B	ChrX	25710	325	24583	275	600	0.541667	0.458333	0.981376	0.0226826	-	-	Multipolar	aneuploid	biparental
Embryo 12.X2	B	Chr1	25710	68	24583	56	124	0.548387	0.451613	0.878539	0.161624	-	-	Multipolar	aneuploid	biparental
Embryo 12.X2	B	Chr2	25710	49	24583	47	96	0.510417	0.489583	0.620175	0.459389	-	-	Multipolar	aneuploid	biparental
Embryo 12.X2	B	Chr3	25710	46	24583	36	82	0.560976	0.439024	0.887878	0.160147	-	-	Multipolar	aneuploid	biparental
Embryo 12.X2	B	Chr4	25710	51	24583	39	90	0.566667	0.433333	0.914879	0.123053	-	-	Multipolar	aneuploid	biparental
Embryo 12.X2	B	Chr5	25710	34	24583	40	74	0.459459	0.540541	0.28069	0.792007	-	-	Multipolar	aneuploid	biparental
Embryo 12.X2	B	Chr6	25710	38	24583	28	66	0.575758	0.424242	0.912357	0.133906	-	-	Multipolar	aneuploid	biparental
Embryo 12.X2	B	Chr7	25710	41	24583	46	87	0.471264	0.528736	0.334142	0.739854	-	-	Multipolar	aneuploid	biparental
Embryo 12.X2	B	Chr8	25710	31	24583	32	63	0.492063	0.507937	0.5	0.599347	-	-	Multipolar	aneuploid	biparental
Embryo 12.X2	B	Chr9	25710	36	24583	26	62	0.580645	0.419355	0.919059	0.126427	-	-	Multipolar	aneuploid	biparental
Embryo 12.X2	B	Chr10	25710	26	24583	28	54	0.481481	0.518519	0.445962	0.658255	-	-	Multipolar	aneuploid	biparental
Embryo 12.X2	B	Chr11	25710	35	24583	29	64	0.546875	0.453125	0.809134	0.266154	-	-	Multipolar	aneuploid	biparental
Embryo 12.X2	B	Chr12	25710	41	24583	32	73	0.561644	0.438356	0.879178	0.174591	-	-	Multipolar	aneuploid	biparental
Embryo 12.X2	B	Chr13	25710	33	24583	23	56	0.589286	0.410714	0.929552	0.114403	-	-	Multipolar	aneuploid	biparental
Embryo 12.X2	B	Chr14	25710	30	24583	33	63	0.47619	0.52381	0.400653	0.692672	-	-	Multipolar	aneuploid	biparental
Embryo 12.X2	B	Chr15	25710	24	24583	27	51	0.470588	0.529412	0.389884	0.712075	-	-	Multipolar	aneuploid	biparental
Embryo 12.X2	B	Chr16	25710	17	24583	27	44	0.386364	0.613636	0.0870856	0.951929	-	-	Multipolar	aneuploid	biparental
Embryo 12.X2	B	Chr17	25710	27	24583	27	54	0.5	0.5	0.554038	0.554038	-	-	Multipolar	aneuploid	biparental
Embryo 12.X2	B	Chr18	25710	18	24583	15	33	0.545455	0.454545	0.756575	0.364166	-	-	Multipolar	aneuploid	biparental
Embryo 12.X2	B	Chr19	25710	18	24583	8	26	0.692308	0.307692	0.98552	0.0377593	-	-	Multipolar	aneuploid	biparental
Embryo 12.X2	B	Chr20	25710	24	24583	31	55	0.436364	0.563636	0.209377	0.859695	-	-	Multipolar	aneuploid	biparental
Embryo 12.X2	B	ChrUn	25710	6	24583	7	13	0.461538	0.538462	0.5	0.709473	-	-	Multipolar	aneuploid	biparental
Embryo 12.X2	B	ChrX	25710	25	24583	24	49	0.510204	0.489796	0.612275	0.5	-	-	Multipolar	aneuploid	biparental
Embryo 13.B1	B	Chr1	25710	125	24583	508	633	0.197472	0.802528	5.83309e-56	1	sig	-	Multipolar	euploid-aneuploid mosaic	mixoploid: androgenetic & biparental blastomere(s)
Embryo 13.B1	B	Chr2	25710	92	24583	480	572	0.160839	0.839161	1.33558e-64	1	sig	-	Multipolar	euploid-aneuploid mosaic	mixoploid: androgenetic & biparental blastomere(s)
Embryo 13.B1	B	Chr3	25710	112	24583	450	562	0.199288	0.800712	2.90123e-49	1	sig	-	Multipolar	euploid-aneuploid mosaic	mixoploid: androgenetic & biparental blastomere(s)
Embryo 13.B1	B	Chr4	25710	88	24583	440	528	0.166667	0.833333	1.372e-57	1	sig	-	Multipolar	euploid-aneuploid mosaic	mixoploid: androgenetic & biparental blastomere(s)
Embryo 13.B1	B	Chr5	25710	84	24583	411	495	0.169697	0.830303	4.66234e-53	1	sig	-	Multipolar	euploid-aneuploid mosaic	mixoploid: androgenetic & biparental blastomere(s)
Embryo 13.B1	B	Chr6	25710	98	24583	382	480	0.204167	0.795833	6.2408e-41	1	sig	-	Multipolar	euploid-aneuploid mosaic	mixoploid: androgenetic & biparental blastomere(s)
Embryo 13.B1	B	Chr7	25710	80	24583	384	464	0.172414	0.827586	5.58138e-49	1	sig	-	Multipolar	euploid-aneuploid mosaic	mixoploid: androgenetic & biparental blastomere(s)
Embryo 13.B1	B	Chr8	25710	70	24583	375	445	0.157303	0.842697	8.85826e-52	1	sig	-	Multipolar	euploid-aneuploid mosaic	mixoploid: androgenetic & biparental blastomere(s)
Embryo 13.B1	B	Chr9	25710	4	24583	3	7	0.571429	0.428571	0.773438	0.5	-	-	Multipolar	euploid-aneuploid mosaic	mixoploid: androgenetic & biparental blastomere(s)
Embryo 13.B1	B	Chr10	25710	70	24583	214	284	0.246479	0.753521	1.96317e-18	1	sig	-	Multipolar	euploid-aneuploid mosaic	mixoploid: androgenetic & biparental blastomere(s)
Embryo 13.B1	B	Chr11	25710	80	24583	312	392	0.204082	0.795918	9.2641e-34	1	sig	-	Multipolar	euploid-aneuploid mosaic	mixoploid: androgenetic & biparental blastomere(s)
Embryo 13.B1	B	Chr12	25710	7	24583	2	9	0.777778	0.222222	0.980469	0.0898438	-	-	Multipolar	euploid-aneuploid mosaic	mixoploid: androgenetic & biparental blastomere(s)
Embryo 13.B1	B	Chr13	25710	51	24583	291	342	0.149123	0.850877	2.95202e-42	1	sig	-	Multipolar	euploid-aneuploid mosaic	mixoploid: androgenetic & biparental blastomere(s)
Embryo 13.B1	B	Chr14	25710	50	24583	254	304	0.164474	0.835526	2.4438e-34	1	sig	-	Multipolar	euploid-aneuploid mosaic	mixoploid: androgenetic & biparental blastomere(s)
Embryo 13.B1	B	Chr15	25710	65	24583	270	335	0.19403	0.80597	3.94806e-31	1	sig	-	Multipolar	euploid-aneuploid mosaic	mixoploid: androgenetic & biparental blastomere(s)
Embryo 13.B1	B	Chr16	25710	62	24583	222	284	0.21831	0.78169	1.3459e-22	1	sig	-	Multipolar	euploid-aneuploid mosaic	mixoploid: androgenetic & biparental blastomere(s)
Embryo 13.B1	B	Chr17	25710	52	24583	278	330	0.157576	0.842424	9.15311e-39	1	sig	-	Multipolar	euploid-aneuploid mosaic	mixoploid: androgenetic & biparental blastomere(s)
Embryo 13.B1	B	Chr18	25710	52	24583	203	255	0.203922	0.796078	1.47748e-22	1	sig	-	Multipolar	euploid-aneuploid mosaic	mixoploid: androgenetic & biparental blastomere(s)
Embryo 13.B1	B	Chr19	25710	19	24583	63	82	0.231707	0.768293	5.73377e-07	1	sig	-	Multipolar	euploid-aneuploid mosaic	mixoploid: androgenetic & biparental blastomere(s)
Embryo 13.B1	B	Chr20	25710	49	24583	241	290	0.168966	0.831034	6.36546e-32	1	sig	-	Multipolar	euploid-aneuploid mosaic	mixoploid: androgenetic & biparental blastomere(s)
Embryo 13.B1	B	ChrUn	25710	10	24583	59	69	0.144928	0.855072	6.8826e-10	1	sig	-	Multipolar	euploid-aneuploid mosaic	mixoploid: androgenetic & biparental blastomere(s)
Embryo 13.B1	B	ChrX	25710	29	24583	237	266	0.109023	0.890977	4.66942e-42	1	sig	-	Multipolar	euploid-aneuploid mosaic	mixoploid: androgenetic & biparental blastomere(s)
Embryo 13.B2	B	Chr1	25710	280	24583	267	547	0.511883	0.488117	0.725259	0.303967	-	-	Multipolar	euploid-aneuploid mosaic	mixoploid: androgenetic & biparental blastomere(s)
Embryo 13.B2	B	Chr2	25710	209	24583	257	466	0.448498	0.551502	0.0146772	0.988444	-	-	Multipolar	euploid-aneuploid mosaic	mixoploid: androgenetic & biparental blastomere(s)
Embryo 13.B2	B	Chr3	25710	226	24583	235	461	0.490239	0.509761	0.354746	0.679278	-	-	Multipolar	euploid-aneuploid mosaic	mixoploid: androgenetic & biparental blastomere(s)
Embryo 13.B2	B	Chr4	25710	224	24583	231	455	0.492308	0.507692	0.389264	0.646165	-	-	Multipolar	euploid-aneuploid mosaic	mixoploid: androgenetic & biparental blastomere(s)
Embryo 13.B2	B	Chr5	25710	216	24583	204	420	0.514286	0.485714	0.737044	0.295748	-	-	Multipolar	euploid-aneuploid mosaic	mixoploid: androgenetic & biparental blastomere(s)
Embryo 13.B2	B	Chr6	25710	172	24583	204	376	0.457447	0.542553	0.054882	0.955675	-	-	Multipolar	euploid-aneuploid mosaic	mixoploid: androgenetic & biparental blastomere(s)
Embryo 13.B2	B	Chr7	25710	161	24583	197	358	0.449721	0.550279	0.0320954	0.974815	-	-	Multipolar	euploid-aneuploid mosaic	mixoploid: androgenetic & biparental blastomere(s)
Embryo 13.B2	B	Chr8	25710	191	24583	210	401	0.476309	0.523691	0.184369	0.841042	-	-	Multipolar	euploid-aneuploid mosaic	mixoploid: androgenetic & biparental blastomere(s)
Embryo 13.B2	B	Chr9	25710	159	24583	190	349	0.455587	0.544413	0.0540855	0.956709	-	-	Multipolar	euploid-aneuploid mosaic	mixoploid: androgenetic & biparental blastomere(s)
Embryo 13.B2	B	Chr10	25710	112	24583	113	225	0.497778	0.502222	0.5	0.553016	-	-	Multipolar	euploid-aneuploid mosaic	mixoploid: androgenetic & biparental blastomere(s)
Embryo 13.B2	B	Chr11	25710	160	24583	149	309	0.517799	0.482201	0.752557	0.284754	-	-	Multipolar	euploid-aneuploid mosaic	mixoploid: androgenetic & biparental blastomere(s)
Embryo 13.B2	B	Chr12	25710	159	24583	159	318	0.5	0.5	0.522354	0.522354	-	-	Multipolar	euploid-aneuploid mosaic	mixoploid: androgenetic & biparental blastomere(s)
Embryo 13.B2	B	Chr13	25710	118	24583	129	247	0.477733	0.522267	0.262337	0.777397	-	-	Multipolar	euploid-aneuploid mosaic	mixoploid: androgenetic & biparental blastomere(s)
Embryo 13.B2	B	Chr14	25710	140	24583	155	295	0.474576	0.525424	0.207527	0.824208	-	-	Multipolar	euploid-aneuploid mosaic	mixoploid: androgenetic & biparental blastomere(s)
Embryo 13.B2	B	Chr15	25710	140	24583	137	277	0.505415	0.494585	0.594939	0.452189	-	-	Multipolar	euploid-aneuploid mosaic	mixoploid: androgenetic & biparental blastomere(s)
Embryo 13.B2	B	Chr16	25710	100	24583	103	203	0.492611	0.507389	0.444205	0.610506	-	-	Multipolar	euploid-aneuploid mosaic	mixoploid: androgenetic & biparental blastomere(s)
Embryo 13.B2	B	Chr17	25710	155	24583	142	297	0.521886	0.478114	0.791686	0.243149	-	-	Multipolar	euploid-aneuploid mosaic	mixoploid: androgenetic & biparental blastomere(s)
Embryo 13.B2	B	Chr18	25710	103	24583	112	215	0.47907	0.52093	0.292724	0.752333	-	-	Multipolar	euploid-aneuploid mosaic	mixoploid: androgenetic & biparental blastomere(s)
Embryo 13.B2	B	Chr19	25710	61	24583	57	118	0.516949	0.483051	0.677252	0.391278	-	-	Multipolar	euploid-aneuploid mosaic	mixoploid: androgenetic & biparental blastomere(s)
Embryo 13.B2	B	Chr20	25710	126	24583	105	231	0.545455	0.454545	0.926201	0.0940452	-	-	Multipolar	euploid-aneuploid mosaic	mixoploid: androgenetic & biparental blastomere(s)
Embryo 13.B2	B	ChrUn	25710	39	24583	46	85	0.458824	0.541176	0.257713	0.807165	-	-	Multipolar	euploid-aneuploid mosaic	mixoploid: androgenetic & biparental blastomere(s)
Embryo 13.B2	B	ChrX	25710	122	24583	114	236	0.516949	0.483051	0.720966	0.324363	-	-	Multipolar	euploid-aneuploid mosaic	mixoploid: androgenetic & biparental blastomere(s)
Embryo 13.B5	B	Chr1	25710	133	24583	519	652	0.203988	0.796012	4.89554e-55	1	sig	-	Multipolar	euploid-aneuploid mosaic	mixoploid: androgenetic & biparental blastomere(s)
Embryo 13.B5	B	Chr2	25710	98	24583	525	623	0.157303	0.842697	8.54922e-72	1	sig	-	Multipolar	euploid-aneuploid mosaic	mixoploid: androgenetic & biparental blastomere(s)
Embryo 13.B5	B	Chr3	25710	98	24583	469	567	0.17284	0.82716	2.65874e-59	1	sig	-	Multipolar	euploid-aneuploid mosaic	mixoploid: androgenetic & biparental blastomere(s)
Embryo 13.B5	B	Chr4	25710	113	24583	478	591	0.191201	0.808799	1.17923e-54	1	sig	-	Multipolar	euploid-aneuploid mosaic	mixoploid: androgenetic & biparental blastomere(s)
Embryo 13.B5	B	Chr5	25710	81	24583	425	506	0.160079	0.839921	1.26396e-57	1	sig	-	Multipolar	euploid-aneuploid mosaic	mixoploid: androgenetic & biparental blastomere(s)
Embryo 13.B5	B	Chr6	25710	96	24583	431	527	0.182163	0.817837	5.69367e-52	1	sig	-	Multipolar	euploid-aneuploid mosaic	mixoploid: androgenetic & biparental blastomere(s)
Embryo 13.B5	B	Chr7	25710	74	24583	384	458	0.161572	0.838428	7.84657e-52	1	sig	-	Multipolar	euploid-aneuploid mosaic	mixoploid: androgenetic & biparental blastomere(s)
Embryo 13.B5	B	Chr8	25710	97	24583	402	499	0.194389	0.805611	1.97505e-45	1	sig	-	Multipolar	euploid-aneuploid mosaic	mixoploid: androgenetic & biparental blastomere(s)
Embryo 13.B5	B	Chr9	25710	6	24583	9	N/A	N/A	N/A	N/A	N/A	N/A	-	Multipolar	euploid-aneuploid mosaic	mixoploid: androgenetic & biparental blastomere(s)
Embryo 13.B5	B	Chr10	25710	56	24583	216	272	0.205882	0.794118	1.22102e-23	1	sig	-	Multipolar	euploid-aneuploid mosaic	mixoploid: androgenetic & biparental blastomere(s)
Embryo 13.B5	B	Chr11	25710	90	24583	315	405	0.222222	0.777778	1.1886e-30	1	sig	-	Multipolar	euploid-aneuploid mosaic	mixoploid: androgenetic & biparental blastomere(s)
Embryo 13.B5	B	Chr12	25710	13	24583	9	N/A	N/A	N/A	N/A	N/A	N/A	-	Multipolar	euploid-aneuploid mosaic	mixoploid: androgenetic & biparental blastomere(s)
Embryo 13.B5	B	Chr13	25710	70	24583	285	355	0.197183	0.802817	3.34502e-32	1	sig	-	Multipolar	euploid-aneuploid mosaic	mixoploid: androgenetic & biparental blastomere(s)
Embryo 13.B5	B	Chr14	25710	68	24583	292	360	0.188889	0.811111	1.73478e-34	1	sig	-	Multipolar	euploid-aneuploid mosaic	mixoploid: androgenetic & biparental blastomere(s)
Embryo 13.B5	B	Chr15	25710	70	24583	269	339	0.20649	0.79351	6.10579e-29	1	sig	-	Multipolar	euploid-aneuploid mosaic	mixoploid: androgenetic & biparental blastomere(s)
Embryo 13.B5	B	Chr16	25710	37	24583	217	254	0.145669	0.854331	1.82444e-32	1	sig	-	Multipolar	euploid-aneuploid mosaic	mixoploid: androgenetic & biparental blastomere(s)
Embryo 13.B5	B	Chr17	25710	64	24583	307	371	0.172507	0.827493	1.76828e-39	1	sig	-	Multipolar	euploid-aneuploid mosaic	mixoploid: androgenetic & biparental blastomere(s)
Embryo 13.B5	B	Chr18	25710	58	24583	176	234	0.247863	0.752137	2.61204e-15	1	sig	-	Multipolar	euploid-aneuploid mosaic	mixoploid: androgenetic & biparental blastomere(s)
Embryo 13.B5	B	Chr19	25710	7	24583	3	N/A	N/A	N/A	N/A	N/A	N/A	-	Multipolar	euploid-aneuploid mosaic	mixoploid: androgenetic & biparental blastomere(s)
Embryo 13.B5	B	Chr20	25710	42	24583	240	282	0.148936	0.851064	3.61973e-35	1	sig	-	Multipolar	euploid-aneuploid mosaic	mixoploid: androgenetic & biparental blastomere(s)
Embryo 13.B5	B	ChrUn	25710	6	24583	62	68	0.0882353	0.911765	4.09098e-13	1	sig	-	Multipolar	euploid-aneuploid mosaic	mixoploid: androgenetic & biparental blastomere(s)
Embryo 13.B5	B	ChrX	25710	52	24583	241	293	0.177474	0.822526	1.51731e-30	1	sig	-	Multipolar	euploid-aneuploid mosaic	mixoploid: androgenetic & biparental blastomere(s)
Embryo 13.B6	B	Chr1	25710	239	24583	259	498	0.47992	0.52008	0.197282	0.826651	-	-	Multipolar	euploid-aneuploid mosaic	mixoploid: androgenetic & biparental blastomere(s)
Embryo 13.B6	B	Chr2	25710	246	24583	287	533	0.461538	0.538462	0.0415358	0.965611	-	-	Multipolar	euploid-aneuploid mosaic	mixoploid: androgenetic & biparental blastomere(s)
Embryo 13.B6	B	Chr3	25710	216	24583	244	460	0.469565	0.530435	0.104013	0.911866	-	-	Multipolar	euploid-aneuploid mosaic	mixoploid: androgenetic & biparental blastomere(s)
Embryo 13.B6	B	Chr4	25710	246	24583	282	528	0.465909	0.534091	0.0638172	0.946369	-	-	Multipolar	euploid-aneuploid mosaic	mixoploid: androgenetic & biparental blastomere(s)
Embryo 13.B6	B	Chr5	25710	228	24583	220	448	0.508929	0.491071	0.664635	0.370449	-	-	Multipolar	euploid-aneuploid mosaic	mixoploid: androgenetic & biparental blastomere(s)
Embryo 13.B6	B	Chr6	25710	239	24583	166	405	0.590123	0.409877	0.999886	0.000167576	-	-	Multipolar	euploid-aneuploid mosaic	mixoploid: androgenetic & biparental blastomere(s)
Embryo 13.B6	B	Chr7	25710	176	24583	247	423	0.416076	0.583924	0.000324001	0.999775	-	-	Multipolar	euploid-aneuploid mosaic	mixoploid: androgenetic & biparental blastomere(s)
Embryo 13.B6	B	Chr8	25710	187	24583	196	383	0.488251	0.511749	0.341378	0.695287	-	-	Multipolar	euploid-aneuploid mosaic	mixoploid: androgenetic & biparental blastomere(s)
Embryo 13.B6	B	Chr9	25710	182	24583	211	393	0.463104	0.536896	0.0788704	0.934951	-	-	Multipolar	euploid-aneuploid mosaic	mixoploid: androgenetic & biparental blastomere(s)
Embryo 13.B6	B	Chr10	25710	106	24583	117	223	0.475336	0.524664	0.251585	0.789149	-	-	Multipolar	euploid-aneuploid mosaic	mixoploid: androgenetic & biparental blastomere(s)
Embryo 13.B6	B	Chr11	25710	138	24583	164	302	0.456954	0.543046	0.0750735	0.939941	-	-	Multipolar	euploid-aneuploid mosaic	mixoploid: androgenetic & biparental blastomere(s)
Embryo 13.B6	B	Chr12	25710	118	24583	171	289	0.408304	0.591696	0.0010837	0.999276	-	-	Multipolar	euploid-aneuploid mosaic	mixoploid: androgenetic & biparental blastomere(s)
Embryo 13.B6	B	Chr13	25710	150	24583	129	279	0.537634	0.462366	0.906147	0.115551	-	-	Multipolar	euploid-aneuploid mosaic	mixoploid: androgenetic & biparental blastomere(s)
Embryo 13.B6	B	Chr14	25710	140	24583	162	302	0.463576	0.536424	0.113415	0.907211	-	-	Multipolar	euploid-aneuploid mosaic	mixoploid: androgenetic & biparental blastomere(s)
Embryo 13.B6	B	Chr15	25710	125	24583	147	272	0.459559	0.540441	0.101411	0.918489	-	-	Multipolar	euploid-aneuploid mosaic	mixoploid: androgenetic & biparental blastomere(s)
Embryo 13.B6	B	Chr16	25710	103	24583	124	227	0.453744	0.546256	0.0921194	0.927964	-	-	Multipolar	euploid-aneuploid mosaic	mixoploid: androgenetic & biparental blastomere(s)
Embryo 13.B6	B	Chr17	25710	141	24583	159	300	0.47	0.53	0.163177	0.863685	-	-	Multipolar	euploid-aneuploid mosaic	mixoploid: androgenetic & biparental blastomere(s)
Embryo 13.B6	B	Chr18	25710	114	24583	108	222	0.513514	0.486486	0.680705	0.368637	-	-	Multipolar	euploid-aneuploid mosaic	mixoploid: androgenetic & biparental blastomere(s)
Embryo 13.B6	B	Chr19	25710	76	24583	68	144	0.527778	0.472222	0.773314	0.279911	-	-	Multipolar	euploid-aneuploid mosaic	mixoploid: androgenetic & biparental blastomere(s)
Embryo 13.B6	B	Chr20	25710	132	24583	119	251	0.525896	0.474104	0.811546	0.224428	-	-	Multipolar	euploid-aneuploid mosaic	mixoploid: androgenetic & biparental blastomere(s)
Embryo 13.B6	B	ChrUn	25710	33	24583	44	77	0.428571	0.571429	0.127152	0.91447	-	-	Multipolar	euploid-aneuploid mosaic	mixoploid: androgenetic & biparental blastomere(s)
Embryo 13.B6	B	ChrX	25710	113	24583	124	237	0.476793	0.523207	0.258028	0.78212	-	-	Multipolar	euploid-aneuploid mosaic	mixoploid: androgenetic & biparental blastomere(s)
Embryo 13.B7B8	B	Chr1	25710	17	24583	13	30	0.566667	0.433333	0.819203	0.292332	-	-	Multipolar	euploid-aneuploid mosaic	mixoploid: androgenetic & biparental blastomere(s)
Embryo 13.B7B8	B	Chr2	25710	14	24583	14	28	0.5	0.5	0.574723	0.574723	-	-	Multipolar	euploid-aneuploid mosaic	mixoploid: androgenetic & biparental blastomere(s)
Embryo 13.B7B8	B	Chr3	25710	7	24583	9	16	0.4375	0.5625	0.40181	0.772751	-	-	Multipolar	euploid-aneuploid mosaic	mixoploid: androgenetic & biparental blastomere(s)
Embryo 13.B7B8	B	Chr4	25710	13	24583	13	26	0.5	0.5	0.577491	0.577491	-	-	Multipolar	euploid-aneuploid mosaic	mixoploid: androgenetic & biparental blastomere(s)
Embryo 13.B7B8	B	Chr5	25710	12	24583	11	23	0.521739	0.478261	0.66118	0.5	-	-	Multipolar	euploid-aneuploid mosaic	mixoploid: androgenetic & biparental blastomere(s)
Embryo 13.B7B8	B	Chr6	25710	3	24583	9	12	0.25	0.75	0.072998	0.980713	-	-	Multipolar	euploid-aneuploid mosaic	mixoploid: androgenetic & biparental blastomere(s)
Embryo 13.B7B8	B	Chr7	25710	14	24583	16	30	0.466667	0.533333	0.427768	0.707668	-	-	Multipolar	euploid-aneuploid mosaic	mixoploid: androgenetic & biparental blastomere(s)
Embryo 13.B7B8	B	Chr8	25710	10	24583	6	16	0.625	0.375	0.894943	0.227249	-	-	Multipolar	euploid-aneuploid mosaic	mixoploid: androgenetic & biparental blastomere(s)
Embryo 13.B7B8	B	Chr9	25710	7	24583	7	14	0.5	0.5	0.604736	0.604736	-	-	Multipolar	euploid-aneuploid mosaic	mixoploid: androgenetic & biparental blastomere(s)
Embryo 13.B7B8	B	Chr10	25710	5	24583	3	8	0.625	0.375	0.855469	0.363281	-	-	Multipolar	euploid-aneuploid mosaic	mixoploid: androgenetic & biparental blastomere(s)
Embryo 13.B7B8	B	Chr11	25710	10	24583	9	19	0.526316	0.473684	0.676197	0.5	-	-	Multipolar	euploid-aneuploid mosaic	mixoploid: androgenetic & biparental blastomere(s)
Embryo 13.B7B8	B	Chr12	25710	10	24583	12	22	0.454545	0.545455	0.415906	0.738266	-	-	Multipolar	euploid-aneuploid mosaic	mixoploid: androgenetic & biparental blastomere(s)
Embryo 13.B7B8	B	Chr13	25710	5	24583	7	12	0.416667	0.583333	0.387207	0.806152	-	-	Multipolar	euploid-aneuploid mosaic	mixoploid: androgenetic & biparental blastomere(s)
Embryo 13.B7B8	B	Chr14	25710	12	24583	14	26	0.461538	0.538462	0.422509	0.721401	-	-	Multipolar	euploid-aneuploid mosaic	mixoploid: androgenetic & biparental blastomere(s)
Embryo 13.B7B8	B	Chr15	25710	10	24583	10	20	0.5	0.5	0.588099	0.588099	-	-	Multipolar	euploid-aneuploid mosaic	mixoploid: androgenetic & biparental blastomere(s)
Embryo 13.B7B8	B	Chr16	25710	7	24583	7	14	0.5	0.5	0.604736	0.604736	-	-	Multipolar	euploid-aneuploid mosaic	mixoploid: androgenetic & biparental blastomere(s)
Embryo 13.B7B8	B	Chr17	25710	6	24583	9	15	0.4	0.6	0.303619	0.849121	-	-	Multipolar	euploid-aneuploid mosaic	mixoploid: androgenetic & biparental blastomere(s)
Embryo 13.B7B8	B	Chr18	25710	7	24583	5	12	0.583333	0.416667	0.806152	0.387207	-	-	Multipolar	euploid-aneuploid mosaic	mixoploid: androgenetic & biparental blastomere(s)
Embryo 13.B7B8	B	Chr19	25710	2	24583	3	5	0.4	0.6	0.5	0.8125	-	-	Multipolar	euploid-aneuploid mosaic	mixoploid: androgenetic & biparental blastomere(s)
Embryo 13.B7B8	B	Chr20	25710	7	24583	13	20	0.35	0.65	0.131588	0.942341	-	-	Multipolar	euploid-aneuploid mosaic	mixoploid: androgenetic & biparental blastomere(s)
Embryo 13.B7B8	B	ChrUn	25710	0	24583	4	4	0	1	0.0625	1	-	-	Multipolar	euploid-aneuploid mosaic	mixoploid: androgenetic & biparental blastomere(s)
Embryo 13.B7B8	B	ChrX	25710	8	24583	7	15	0.533333	0.466667	0.696381	0.5	-	-	Multipolar	euploid-aneuploid mosaic	mixoploid: androgenetic & biparental blastomere(s)
Embryo 13.F9	CCF	Chr1	25710	64	24583	49	113	0.566372	0.433628	0.934038	0.0937994	-	-	Multipolar	euploid-aneuploid mosaic	mixoploid: androgenetic & biparental blastomere(s)
Embryo 13.F9	CCF	Chr1	25710	36	24583	16	52	0.692308	0.307692	0.998407	0.00389372	-	-	Multipolar	euploid-aneuploid mosaic	mixoploid: androgenetic & biparental blastomere(s)
Embryo 13.F9	CCF	Chr2	25710	86	24583	42	128	0.671875	0.328125	0.999971	6.26791e-05	-	-	Multipolar	euploid-aneuploid mosaic	mixoploid: androgenetic & biparental blastomere(s)
Embryo 13.F9	CCF	Chr2	25710	57	24583	22	79	0.721519	0.278481	0.999981	5.12982e-05	-	-	Multipolar	euploid-aneuploid mosaic	mixoploid: androgenetic & biparental blastomere(s)
Embryo 13.F9	CCF	Chr3	25710	48	24583	31	79	0.607595	0.392405	0.978917	0.0355817	-	-	Multipolar	euploid-aneuploid mosaic	mixoploid: androgenetic & biparental blastomere(s)
Embryo 13.F9	CCF	Chr3	25710	22	24583	19	41	0.536585	0.463415	0.733645	0.377614	-	-	Multipolar	euploid-aneuploid mosaic	mixoploid: androgenetic & biparental blastomere(s)
Embryo 13.F9	CCF	Chr4	25710	77	24583	41	118	0.652542	0.347458	0.999701	0.000589197	-	-	Multipolar	euploid-aneuploid mosaic	mixoploid: androgenetic & biparental blastomere(s)
Embryo 13.F9	CCF	Chr4	25710	37	24583	13	50	0.74	0.26	0.999847	0.000468111	-	-	Multipolar	euploid-aneuploid mosaic	mixoploid: androgenetic & biparental blastomere(s)
Embryo 13.F9	CCF	Chr5	25710	84	24583	36	120	0.7	0.3	0.999997	6.94851e-06	-	sig	Multipolar	euploid-aneuploid mosaic	mixoploid: androgenetic & biparental blastomere(s)
Embryo 13.F9	CCF	Chr5	25710	46	24583	24	70	0.657143	0.342857	0.997209	0.0057632	-	-	Multipolar	euploid-aneuploid mosaic	mixoploid: androgenetic & biparental blastomere(s)
Embryo 13.F9	CCF	Chr6	25710	77	24583	33	110	0.7	0.3	0.999993	1.64841e-05	-	-	Multipolar	euploid-aneuploid mosaic	mixoploid: androgenetic & biparental blastomere(s)
Embryo 13.F9	CCF	Chr6	25710	48	24583	16	64	0.75	0.25	0.999988	3.86654e-05	-	-	Multipolar	euploid-aneuploid mosaic	mixoploid: androgenetic & biparental blastomere(s)
Embryo 13.F9	CCF	Chr7	25710	45	24583	18	63	0.714286	0.285714	0.999832	0.000449024	-	-	Multipolar	euploid-aneuploid mosaic	mixoploid: androgenetic & biparental blastomere(s)
Embryo 13.F9	CCF	Chr7	25710	21	24583	12	33	0.636364	0.363636	0.959928	0.0813778	-	-	Multipolar	euploid-aneuploid mosaic	mixoploid: androgenetic & biparental blastomere(s)
Embryo 13.F9	CCF	Chr8	25710	64	24583	20	84	0.761905	0.238095	1	7.92463e-07	-	sig	Multipolar	euploid-aneuploid mosaic	mixoploid: androgenetic & biparental blastomere(s)
Embryo 13.F9	CCF	Chr8	25710	43	24583	10	53	0.811321	0.188679	0.999999	2.77526e-06	-	sig	Multipolar	euploid-aneuploid mosaic	mixoploid: androgenetic & biparental blastomere(s)
Embryo 13.F9	CCF	Chr9	25710	145	24583	454	599	0.24207	0.75793	2.54639e-38	1	sig	-	Multipolar	euploid-aneuploid mosaic	mixoploid: androgenetic & biparental blastomere(s)
Embryo 13.F9	CCF	Chr9	25710	88	24583	273	361	0.243767	0.756233	1.80763e-23	1	sig	-	Multipolar	euploid-aneuploid mosaic	mixoploid: androgenetic & biparental blastomere(s)
Embryo 13.F9	CCF	Chr10	25710	33	24583	13	46	0.717391	0.282609	0.999179	0.00226693	-	-	Multipolar	euploid-aneuploid mosaic	mixoploid: androgenetic & biparental blastomere(s)
Embryo 13.F9	CCF	Chr10	25710	15	24583	9	24	0.625	0.375	0.924205	0.153728	-	-	Multipolar	euploid-aneuploid mosaic	mixoploid: androgenetic & biparental blastomere(s)
Embryo 13.F9	CCF	Chr11	25710	48	24583	24	72	0.666667	0.333333	0.998529	0.00315491	-	-	Multipolar	euploid-aneuploid mosaic	mixoploid: androgenetic & biparental blastomere(s)
Embryo 13.F9	CCF	Chr11	25710	27	24583	22	49	0.55102	0.44898	0.804199	0.284086	-	-	Multipolar	euploid-aneuploid mosaic	mixoploid: androgenetic & biparental blastomere(s)
Embryo 13.F9	CCF	Chr12	25710	125	24583	399	524	0.23855	0.76145	1.15097e-34	1	sig	-	Multipolar	euploid-aneuploid mosaic	mixoploid: androgenetic & biparental blastomere(s)
Embryo 13.F9	CCF	Chr12	25710	69	24583	238	307	0.224756	0.775244	3.25258e-23	1	sig	-	Multipolar	euploid-aneuploid mosaic	mixoploid: androgenetic & biparental blastomere(s)
Embryo 13.F9	CCF	Chr13	25710	51	24583	24	75	0.68	0.32	0.99946	0.00122211	-	-	Multipolar	euploid-aneuploid mosaic	mixoploid: androgenetic & biparental blastomere(s)
Embryo 13.F9	CCF	Chr13	25710	30	24583	13	43	0.697674	0.302326	0.997299	0.00685909	-	-	Multipolar	euploid-aneuploid mosaic	mixoploid: androgenetic & biparental blastomere(s)
Embryo 13.F9	CCF	Chr14	25710	59	24583	33	92	0.641304	0.358696	0.997695	0.00439047	-	-	Multipolar	euploid-aneuploid mosaic	mixoploid: androgenetic & biparental blastomere(s)
Embryo 13.F9	CCF	Chr14	25710	29	24583	16	45	0.644444	0.355556	0.982151	0.0362271	-	-	Multipolar	euploid-aneuploid mosaic	mixoploid: androgenetic & biparental blastomere(s)
Embryo 13.F9	CCF	Chr15	25710	63	24583	17	80	0.7875	0.2125	1	1.13307e-07	-	sig	Multipolar	euploid-aneuploid mosaic	mixoploid: androgenetic & biparental blastomere(s)
Embryo 13.F9	CCF	Chr15	25710	25	24583	14	39	0.641026	0.358974	0.973374	0.0540645	-	-	Multipolar	euploid-aneuploid mosaic	mixoploid: androgenetic & biparental blastomere(s)
Embryo 13.F9	CCF	Chr16	25710	27	24583	11	38	0.710526	0.289474	0.997451	0.00692648	-	-	Multipolar	euploid-aneuploid mosaic	mixoploid: androgenetic & biparental blastomere(s)
Embryo 13.F9	CCF	Chr16	25710	13	24583	4	17	0.764706	0.235294	0.993637	0.0245209	-	-	Multipolar	euploid-aneuploid mosaic	mixoploid: androgenetic & biparental blastomere(s)
Embryo 13.F9	CCF	Chr17	25710	46	24583	19	65	0.707692	0.292308	0.999789	0.000545042	-	-	Multipolar	euploid-aneuploid mosaic	mixoploid: androgenetic & biparental blastomere(s)
Embryo 13.F9	CCF	Chr17	25710	40	24583	2	42	0.952381	0.047619	1	2.05546e-10	-	sig	Multipolar	euploid-aneuploid mosaic	mixoploid: androgenetic & biparental blastomere(s)
Embryo 13.F9	CCF	Chr18	25710	26	24583	17	43	0.604651	0.395349	0.936855	0.111026	-	-	Multipolar	euploid-aneuploid mosaic	mixoploid: androgenetic & biparental blastomere(s)
Embryo 13.F9	CCF	Chr18	25710	13	24583	5	18	0.722222	0.277778	0.984558	0.0481262	-	-	Multipolar	euploid-aneuploid mosaic	mixoploid: androgenetic & biparental blastomere(s)
Embryo 13.F9	CCF	Chr19	25710	12	24583	5	17	0.705882	0.294118	0.975479	0.0717316	-	-	Multipolar	euploid-aneuploid mosaic	mixoploid: androgenetic & biparental blastomere(s)
Embryo 13.F9	CCF	Chr19	25710	7	24583	3	10	0.7	0.3	0.945312	0.171875	-	-	Multipolar	euploid-aneuploid mosaic	mixoploid: androgenetic & biparental blastomere(s)
Embryo 13.F9	CCF	Chr20	25710	33	24583	19	52	0.634615	0.365385	0.981758	0.0351971	-	-	Multipolar	euploid-aneuploid mosaic	mixoploid: androgenetic & biparental blastomere(s)
Embryo 13.F9	CCF	Chr20	25710	14	24583	8	22	0.636364	0.363636	0.9331	0.143139	-	-	Multipolar	euploid-aneuploid mosaic	mixoploid: androgenetic & biparental blastomere(s)
Embryo 13.F9	CCF	ChrUn	25710	8	24583	17	25	0.32	0.68	0.0538761	0.978357	-	-	Multipolar	euploid-aneuploid mosaic	mixoploid: androgenetic & biparental blastomere(s)
Embryo 13.F9	CCF	ChrUn	25710	9	24583	8	17	0.529412	0.470588	0.685471	0.5	-	-	Multipolar	euploid-aneuploid mosaic	mixoploid: androgenetic & biparental blastomere(s)
Embryo 13.F9	CCF	ChrX	25710	35	24583	15	50	0.7	0.3	0.998699	0.00330022	-	-	Multipolar	euploid-aneuploid mosaic	mixoploid: androgenetic & biparental blastomere(s)
Embryo 13.F9	CCF	ChrX	25710	20	24583	5	25	0.8	0.2	0.999545	0.00203866	-	-	Multipolar	euploid-aneuploid mosaic	mixoploid: androgenetic & biparental blastomere(s)
Embryo 13.X11	UNKN	Chr1	25710	23	24583	19	42	0.547619	0.452381	0.7796	0.321984	-	-	Multipolar	euploid-aneuploid mosaic	mixoploid: androgenetic & biparental blastomere(s)
Embryo 13.X11	UNKN	Chr2	25710	15	24583	13	28	0.535714	0.464286	0.714206	0.425277	-	-	Multipolar	euploid-aneuploid mosaic	mixoploid: androgenetic & biparental blastomere(s)
Embryo 13.X11	UNKN	Chr3	25710	27	24583	12	39	0.692308	0.307692	0.995262	0.0118514	-	-	Multipolar	euploid-aneuploid mosaic	mixoploid: androgenetic & biparental blastomere(s)
Embryo 13.X11	UNKN	Chr4	25710	23	24583	16	39	0.589744	0.410256	0.900205	0.168392	-	-	Multipolar	euploid-aneuploid mosaic	mixoploid: androgenetic & biparental blastomere(s)
Embryo 13.X11	UNKN	Chr5	25710	28	24583	15	43	0.651163	0.348837	0.98423	0.032997	-	-	Multipolar	euploid-aneuploid mosaic	mixoploid: androgenetic & biparental blastomere(s)
Embryo 13.X11	UNKN	Chr6	25710	25	24583	15	40	0.625	0.375	0.959655	0.07693	-	-	Multipolar	euploid-aneuploid mosaic	mixoploid: androgenetic & biparental blastomere(s)
Embryo 13.X11	UNKN	Chr7	25710	18	24583	18	36	0.5	0.5	0.56603	0.56603	-	-	Multipolar	euploid-aneuploid mosaic	mixoploid: androgenetic & biparental blastomere(s)
Embryo 13.X11	UNKN	Chr8	25710	18	24583	15	33	0.545455	0.454545	0.756575	0.364166	-	-	Multipolar	euploid-aneuploid mosaic	mixoploid: androgenetic & biparental blastomere(s)
Embryo 13.X11	UNKN	Chr9	25710	23	24583	7	30	0.766667	0.233333	0.999285	0.00261144	-	-	Multipolar	euploid-aneuploid mosaic	mixoploid: androgenetic & biparental blastomere(s)
Embryo 13.X11	UNKN	Chr10	25710	5	24583	6	11	0.454545	0.545455	0.5	0.725586	-	-	Multipolar	euploid-aneuploid mosaic	mixoploid: androgenetic & biparental blastomere(s)
Embryo 13.X11	UNKN	Chr11	25710	15	24583	7	22	0.681818	0.318182	0.973761	0.0669003	-	-	Multipolar	euploid-aneuploid mosaic	mixoploid: androgenetic & biparental blastomere(s)
Embryo 13.X11	UNKN	Chr12	25710	21	24583	12	33	0.636364	0.363636	0.959928	0.0813778	-	-	Multipolar	euploid-aneuploid mosaic	mixoploid: androgenetic & biparental blastomere(s)
Embryo 13.X11	UNKN	Chr13	25710	14	24583	8	22	0.636364	0.363636	0.9331	0.143139	-	-	Multipolar	euploid-aneuploid mosaic	mixoploid: androgenetic & biparental blastomere(s)
Embryo 13.X11	UNKN	Chr14	25710	18	24583	13	31	0.580645	0.419355	0.859479	0.236565	-	-	Multipolar	euploid-aneuploid mosaic	mixoploid: androgenetic & biparental blastomere(s)
Embryo 13.X11	UNKN	Chr15	25710	9	24583	5	14	0.642857	0.357143	0.910217	0.211975	-	-	Multipolar	euploid-aneuploid mosaic	mixoploid: androgenetic & biparental blastomere(s)
Embryo 13.X11	UNKN	Chr16	25710	14	24583	8	22	0.636364	0.363636	0.9331	0.143139	-	-	Multipolar	euploid-aneuploid mosaic	mixoploid: androgenetic & biparental blastomere(s)
Embryo 13.X11	UNKN	Chr17	25710	15	24583	13	28	0.535714	0.464286	0.714206	0.425277	-	-	Multipolar	euploid-aneuploid mosaic	mixoploid: androgenetic & biparental blastomere(s)
Embryo 13.X11	UNKN	Chr18	25710	4	24583	8	12	0.333333	0.666667	0.193848	0.927002	-	-	Multipolar	euploid-aneuploid mosaic	mixoploid: androgenetic & biparental blastomere(s)
Embryo 13.X11	UNKN	Chr19	25710	7	24583	6	13	0.538462	0.461538	0.709473	0.5	-	-	Multipolar	euploid-aneuploid mosaic	mixoploid: androgenetic & biparental blastomere(s)
Embryo 13.X11	UNKN	Chr20	25710	19	24583	14	33	0.575758	0.424242	0.851897	0.243425	-	-	Multipolar	euploid-aneuploid mosaic	mixoploid: androgenetic & biparental blastomere(s)
Embryo 13.X11	UNKN	ChrUn	25710	2	24583	2	4	0.5	0.5	0.6875	0.6875	-	-	Multipolar	euploid-aneuploid mosaic	mixoploid: androgenetic & biparental blastomere(s)
Embryo 13.X11	UNKN	ChrX	25710	15	24583	11	26	0.576923	0.423077	0.83653	0.278599	-	-	Multipolar	euploid-aneuploid mosaic	mixoploid: androgenetic & biparental blastomere(s)
Embryo 14.B1	B	Chr1	25710	585	24583	503	1088	0.537684	0.462316	0.994088	0.00701253	-	-	Bipolar	euploid-aneuploid mosaic	biparental
Embryo 14.B1	B	Chr2	25710	556	24583	498	1054	0.527514	0.472486	0.965441	0.0395437	-	-	Bipolar	euploid-aneuploid mosaic	biparental
Embryo 14.B1	B	Chr3	25710	436	24583	462	898	0.485523	0.514477	0.202074	0.816202	-	-	Bipolar	euploid-aneuploid mosaic	biparental
Embryo 14.B1	B	Chr4	25710	477	24583	416	893	0.534155	0.465845	0.981025	0.0223008	-	-	Bipolar	euploid-aneuploid mosaic	biparental
Embryo 14.B1	B	Chr5	25710	401	24583	462	863	0.464658	0.535342	0.0205237	0.982623	-	-	Bipolar	euploid-aneuploid mosaic	biparental
Embryo 14.B1	B	Chr6	25710	418	24583	434	852	0.49061	0.50939	0.303677	0.719842	-	-	Bipolar	euploid-aneuploid mosaic	biparental
Embryo 14.B1	B	Chr7	25710	395	24583	385	780	0.50641	0.49359	0.653146	0.373643	-	-	Bipolar	euploid-aneuploid mosaic	biparental
Embryo 14.B1	B	Chr8	25710	349	24583	359	708	0.492938	0.507062	0.367604	0.66033	-	-	Bipolar	euploid-aneuploid mosaic	biparental
Embryo 14.B1	B	Chr9	25710	386	24583	422	808	0.477723	0.522277	0.109094	0.903499	-	-	Bipolar	euploid-aneuploid mosaic	biparental
Embryo 14.B1	B	Chr10	25710	259	24583	264	523	0.49522	0.50478	0.430587	0.603464	-	-	Bipolar	euploid-aneuploid mosaic	biparental
Embryo 14.B1	B	Chr11	25710	336	24583	320	656	0.512195	0.487805	0.746556	0.279071	-	-	Bipolar	euploid-aneuploid mosaic	biparental
Embryo 14.B1	B	Chr12	25710	329	24583	364	693	0.474747	0.525253	0.098238	0.914292	-	-	Bipolar	euploid-aneuploid mosaic	biparental
Embryo 14.B1	B	Chr13	25710	294	24583	276	570	0.515789	0.484211	0.78692	0.238232	-	-	Bipolar	euploid-aneuploid mosaic	biparental
Embryo 14.B1	B	Chr14	25710	321	24583	279	600	0.535	0.465	0.960454	0.047042	-	-	Bipolar	euploid-aneuploid mosaic	biparental
Embryo 14.B1	B	Chr15	25710	256	24583	277	533	0.4803	0.5197	0.193173	0.829683	-	-	Bipolar	euploid-aneuploid mosaic	biparental
Embryo 14.B1	B	Chr16	25710	207	24583	245	452	0.457965	0.542035	0.0408431	0.966762	-	-	Bipolar	euploid-aneuploid mosaic	biparental
Embryo 14.B1	B	Chr17	25710	267	24583	306	573	0.465969	0.534031	0.0561631	0.952685	-	-	Bipolar	euploid-aneuploid mosaic	biparental
Embryo 14.B1	B	Chr18	25710	203	24583	214	417	0.486811	0.513189	0.312199	0.721588	-	-	Bipolar	euploid-aneuploid mosaic	biparental
Embryo 14.B1	B	Chr19	25710	148	24583	104	252	0.587302	0.412698	0.997754	0.00331899	-	-	Bipolar	euploid-aneuploid mosaic	biparental
Embryo 14.B1	B	Chr20	25710	241	24583	246	487	0.494867	0.505133	0.428095	0.607129	-	-	Bipolar	euploid-aneuploid mosaic	biparental
Embryo 14.B1	B	ChrUn	25710	78	24583	90	168	0.464286	0.535714	0.198067	0.842063	-	-	Bipolar	euploid-aneuploid mosaic	biparental
Embryo 14.B1	B	ChrX	25710	207	24583	48	255	0.811765	0.188235	1	5.2169e-25	-	sig	Bipolar	euploid-aneuploid mosaic	biparental
Embryo 14.B2	B	Chr1	25710	570	24583	534	1104	0.516304	0.483696	0.867272	0.146082	-	-	Bipolar	euploid-aneuploid mosaic	biparental
Embryo 14.B2	B	Chr2	25710	491	24583	514	1005	0.488557	0.511443	0.24386	0.775484	-	-	Bipolar	euploid-aneuploid mosaic	biparental
Embryo 14.B2	B	Chr3	25710	461	24583	462	923	0.499458	0.500542	0.5	0.526241	-	-	Bipolar	euploid-aneuploid mosaic	biparental
Embryo 14.B2	B	Chr4	25710	478	24583	444	922	0.518438	0.481562	0.875483	0.138559	-	-	Bipolar	euploid-aneuploid mosaic	biparental
Embryo 14.B2	B	Chr5	25710	431	24583	472	903	0.477298	0.522702	0.0915597	0.918913	-	-	Bipolar	euploid-aneuploid mosaic	biparental
Embryo 14.B2	B	Chr6	25710	462	24583	433	895	0.516201	0.483799	0.842019	0.174656	-	-	Bipolar	euploid-aneuploid mosaic	biparental
Embryo 14.B2	B	Chr7	25710	451	24583	394	845	0.533728	0.466272	0.977025	0.0269914	-	-	Bipolar	euploid-aneuploid mosaic	biparental
Embryo 14.B2	B	Chr8	25710	387	24583	394	781	0.495519	0.504481	0.41501	0.612651	-	-	Bipolar	euploid-aneuploid mosaic	biparental
Embryo 14.B2	B	Chr9	25710	365	24583	325	690	0.528986	0.471014	0.940752	0.0687824	-	-	Bipolar	euploid-aneuploid mosaic	biparental
Embryo 14.B2	B	Chr10	25710	252	24583	244	496	0.508065	0.491935	0.656914	0.376661	-	-	Bipolar	euploid-aneuploid mosaic	biparental
Embryo 14.B2	B	Chr11	25710	359	24583	300	659	0.544765	0.455235	0.990322	0.011894	-	-	Bipolar	euploid-aneuploid mosaic	biparental
Embryo 14.B2	B	Chr12	25710	333	24583	327	660	0.504545	0.495455	0.607359	0.422853	-	-	Bipolar	euploid-aneuploid mosaic	biparental
Embryo 14.B2	B	Chr13	25710	360	24583	281	641	0.561622	0.438378	0.999221	0.00102039	-	-	Bipolar	euploid-aneuploid mosaic	biparental
Embryo 14.B2	B	Chr14	25710	302	24583	307	609	0.495895	0.504105	0.435627	0.596036	-	-	Bipolar	euploid-aneuploid mosaic	biparental
Embryo 14.B2	B	Chr15	25710	293	24583	285	578	0.50692	0.49308	0.645911	0.385479	-	-	Bipolar	euploid-aneuploid mosaic	biparental
Embryo 14.B2	B	Chr16	25710	212	24583	222	434	0.488479	0.511521	0.33289	0.701231	-	-	Bipolar	euploid-aneuploid mosaic	biparental
Embryo 14.B2	B	Chr17	25710	280	24583	281	561	0.499109	0.500891	0.5	0.533642	-	-	Bipolar	euploid-aneuploid mosaic	biparental
Embryo 14.B2	B	Chr18	25710	214	24583	226	440	0.486364	0.513636	0.300024	0.732265	-	-	Bipolar	euploid-aneuploid mosaic	biparental
Embryo 14.B2	B	Chr19	25710	153	24583	111	264	0.579545	0.420455	0.995994	0.00574085	-	-	Bipolar	euploid-aneuploid mosaic	biparental
Embryo 14.B2	B	Chr20	25710	248	24583	212	460	0.53913	0.46087	0.957804	0.0513002	-	-	Bipolar	euploid-aneuploid mosaic	biparental
Embryo 14.B2	B	ChrUn	25710	81	24583	75	156	0.519231	0.480769	0.712342	0.344527	-	-	Bipolar	euploid-aneuploid mosaic	biparental
Embryo 14.B2	B	ChrX	25710	239	24583	46	285	0.838596	0.161404	1	6.48652e-33	-	sig	Bipolar	euploid-aneuploid mosaic	biparental
Embryo 14.B3	B	Chr1	25710	514	24583	501	1015	0.506404	0.493596	0.669816	0.353223	-	-	Bipolar	euploid-aneuploid mosaic	biparental
Embryo 14.B3	B	Chr2	25710	443	24583	430	873	0.507446	0.492554	0.682176	0.342332	-	-	Bipolar	euploid-aneuploid mosaic	biparental
Embryo 14.B3	B	Chr3	25710	372	24583	409	781	0.476312	0.523688	0.0988257	0.913064	-	-	Bipolar	euploid-aneuploid mosaic	biparental
Embryo 14.B3	B	Chr4	25710	403	24583	413	816	0.493873	0.506127	0.376368	0.649897	-	-	Bipolar	euploid-aneuploid mosaic	biparental
Embryo 14.B3	B	Chr5	25710	364	24583	409	773	0.470893	0.529107	0.0567305	0.951019	-	-	Bipolar	euploid-aneuploid mosaic	biparental
Embryo 14.B3	B	Chr6	25710	408	24583	364	772	0.528497	0.471503	0.94737	0.0608308	-	-	Bipolar	euploid-aneuploid mosaic	biparental
Embryo 14.B3	B	Chr7	25710	378	24583	299	677	0.558346	0.441654	0.998958	0.0013466	-	-	Bipolar	euploid-aneuploid mosaic	biparental
Embryo 14.B3	B	Chr8	25710	321	24583	327	648	0.49537	0.50463	0.422151	0.608324	-	-	Bipolar	euploid-aneuploid mosaic	biparental
Embryo 14.B3	B	Chr9	25710	286	24583	291	577	0.495667	0.504333	0.433882	0.598609	-	-	Bipolar	euploid-aneuploid mosaic	biparental
Embryo 14.B3	B	Chr10	25710	204	24583	215	419	0.486874	0.513126	0.312613	0.721116	-	-	Bipolar	euploid-aneuploid mosaic	biparental
Embryo 14.B3	B	Chr11	25710	273	24583	288	561	0.486631	0.513369	0.277252	0.75031	-	-	Bipolar	euploid-aneuploid mosaic	biparental
Embryo 14.B3	B	Chr12	25710	289	24583	302	591	0.489002	0.510998	0.310808	0.717634	-	-	Bipolar	euploid-aneuploid mosaic	biparental
Embryo 14.B3	B	Chr13	25710	249	24583	240	489	0.509202	0.490798	0.674421	0.358781	-	-	Bipolar	euploid-aneuploid mosaic	biparental
Embryo 14.B3	B	Chr14	25710	255	24583	240	495	0.515152	0.484848	0.763957	0.264613	-	-	Bipolar	euploid-aneuploid mosaic	biparental
Embryo 14.B3	B	Chr15	25710	220	24583	225	445	0.494382	0.505618	0.424818	0.61194	-	-	Bipolar	euploid-aneuploid mosaic	biparental
Embryo 14.B3	B	Chr16	25710	169	24583	184	353	0.478754	0.521246	0.228116	0.802765	-	-	Bipolar	euploid-aneuploid mosaic	biparental
Embryo 14.B3	B	Chr17	25710	256	24583	265	521	0.491363	0.508637	0.363005	0.669325	-	-	Bipolar	euploid-aneuploid mosaic	biparental
Embryo 14.B3	B	Chr18	25710	202	24583	166	368	0.548913	0.451087	0.973193	0.0339654	-	-	Bipolar	euploid-aneuploid mosaic	biparental
Embryo 14.B3	B	Chr19	25710	116	24583	115	231	0.502165	0.497835	0.552327	0.5	-	-	Bipolar	euploid-aneuploid mosaic	biparental
Embryo 14.B3	B	Chr20	25710	204	24583	189	393	0.519084	0.480916	0.790176	0.240053	-	-	Bipolar	euploid-aneuploid mosaic	biparental
Embryo 14.B3	B	ChrUn	25710	67	24583	71	138	0.485507	0.514493	0.399272	0.664733	-	-	Bipolar	euploid-aneuploid mosaic	biparental
Embryo 14.B3	B	ChrX	25710	179	24583	48	227	0.788546	0.211454	1	2.93836e-19	-	sig	Bipolar	euploid-aneuploid mosaic	biparental
Embryo 14.B4	B	Chr1	25710	457	24583	465	922	0.495662	0.504338	0.408847	0.616528	-	-	Bipolar	euploid-aneuploid mosaic	biparental
Embryo 14.B4	B	Chr2	25710	458	24583	388	846	0.541371	0.458629	0.992701	0.00881371	-	-	Bipolar	euploid-aneuploid mosaic	biparental
Embryo 14.B4	B	Chr3	25710	352	24583	357	709	0.496474	0.503526	0.440301	0.589131	-	-	Bipolar	euploid-aneuploid mosaic	biparental
Embryo 14.B4	B	Chr4	25710	353	24583	352	705	0.500709	0.499291	0.530018	0.5	-	-	Bipolar	euploid-aneuploid mosaic	biparental
Embryo 14.B4	B	Chr5	25710	334	24583	356	690	0.484058	0.515942	0.212023	0.809368	-	-	Bipolar	euploid-aneuploid mosaic	biparental
Embryo 14.B4	B	Chr6	25710	347	24583	338	685	0.506569	0.493431	0.648784	0.379943	-	-	Bipolar	euploid-aneuploid mosaic	biparental
Embryo 14.B4	B	Chr7	25710	294	24583	335	629	0.467409	0.532591	0.0553303	0.953038	-	-	Bipolar	euploid-aneuploid mosaic	biparental
Embryo 14.B4	B	Chr8	25710	292	24583	290	582	0.501718	0.498282	0.549476	0.48347	-	-	Bipolar	euploid-aneuploid mosaic	biparental
Embryo 14.B4	B	Chr9	25710	289	24583	302	591	0.489002	0.510998	0.310808	0.717634	-	-	Bipolar	euploid-aneuploid mosaic	biparental
Embryo 14.B4	B	Chr10	25710	222	24583	203	425	0.522353	0.477647	0.834009	0.191308	-	-	Bipolar	euploid-aneuploid mosaic	biparental
Embryo 14.B4	B	Chr11	25710	271	24583	272	543	0.499079	0.500921	0.5	0.534193	-	-	Bipolar	euploid-aneuploid mosaic	biparental
Embryo 14.B4	B	Chr12	25710	231	24583	258	489	0.472393	0.527607	0.11983	0.897303	-	-	Bipolar	euploid-aneuploid mosaic	biparental
Embryo 14.B4	B	Chr13	25710	236	24583	235	471	0.501062	0.498938	0.536706	0.5	-	-	Bipolar	euploid-aneuploid mosaic	biparental
Embryo 14.B4	B	Chr14	25710	257	24583	225	482	0.533195	0.466805	0.933637	0.0789376	-	-	Bipolar	euploid-aneuploid mosaic	biparental
Embryo 14.B4	B	Chr15	25710	237	24583	215	452	0.524336	0.475664	0.860343	0.161637	-	-	Bipolar	euploid-aneuploid mosaic	biparental
Embryo 14.B4	B	Chr16	25710	197	24583	177	374	0.526738	0.473262	0.861244	0.162937	-	-	Bipolar	euploid-aneuploid mosaic	biparental
Embryo 14.B4	B	Chr17	25710	222	24583	228	450	0.493333	0.506667	0.406848	0.629273	-	-	Bipolar	euploid-aneuploid mosaic	biparental
Embryo 14.B4	B	Chr18	25710	188	24583	172	360	0.522222	0.477778	0.814857	0.214618	-	-	Bipolar	euploid-aneuploid mosaic	biparental
Embryo 14.B4	B	Chr19	25710	146	24583	124	270	0.540741	0.459259	0.919266	0.100577	-	-	Bipolar	euploid-aneuploid mosaic	biparental
Embryo 14.B4	B	Chr20	25710	217	24583	218	435	0.498851	0.501149	0.5	0.53819	-	-	Bipolar	euploid-aneuploid mosaic	biparental
Embryo 14.B4	B	ChrUn	25710	61	24583	57	118	0.516949	0.483051	0.677252	0.391278	-	-	Bipolar	euploid-aneuploid mosaic	biparental
Embryo 14.B4	B	ChrX	25710	165	24583	28	193	0.854922	0.145078	1	3.96317e-25	-	sig	Bipolar	euploid-aneuploid mosaic	biparental
Embryo 14.B5	B	Chr1	25710	460	24583	466	926	0.49676	0.50324	0.434749	0.59096	-	-	Bipolar	euploid-aneuploid mosaic	biparental
Embryo 14.B5	B	Chr2	25710	494	24583	456	950	0.52	0.48	0.897135	0.114976	-	-	Bipolar	euploid-aneuploid mosaic	biparental
Embryo 14.B5	B	Chr3	25710	431	24583	386	817	0.52754	0.47246	0.946257	0.0618314	-	-	Bipolar	euploid-aneuploid mosaic	biparental
Embryo 14.B5	B	Chr4	25710	388	24583	371	759	0.511199	0.488801	0.743224	0.280714	-	-	Bipolar	euploid-aneuploid mosaic	biparental
Embryo 14.B5	B	Chr5	25710	387	24583	378	765	0.505882	0.494118	0.641143	0.38621	-	-	Bipolar	euploid-aneuploid mosaic	biparental
Embryo 14.B5	B	Chr6	25710	358	24583	357	715	0.500699	0.499301	0.529808	0.5	-	-	Bipolar	euploid-aneuploid mosaic	biparental
Embryo 14.B5	B	Chr7	25710	328	24583	330	658	0.49848	0.50152	0.484454	0.546545	-	-	Bipolar	euploid-aneuploid mosaic	biparental
Embryo 14.B5	B	Chr8	25710	325	24583	314	639	0.508607	0.491393	0.682487	0.346218	-	-	Bipolar	euploid-aneuploid mosaic	biparental
Embryo 14.B5	B	Chr9	25710	351	24583	304	655	0.535878	0.464122	0.96968	0.0360981	-	-	Bipolar	euploid-aneuploid mosaic	biparental
Embryo 14.B5	B	Chr10	25710	256	24583	220	476	0.537815	0.462185	0.9551	0.0542838	-	-	Bipolar	euploid-aneuploid mosaic	biparental
Embryo 14.B5	B	Chr11	25710	277	24583	267	544	0.509191	0.490809	0.681381	0.349814	-	-	Bipolar	euploid-aneuploid mosaic	biparental
Embryo 14.B5	B	Chr12	25710	272	24583	271	543	0.500921	0.499079	0.534193	0.5	-	-	Bipolar	euploid-aneuploid mosaic	biparental
Embryo 14.B5	B	Chr13	25710	236	24583	234	470	0.502128	0.497872	0.55502	0.481608	-	-	Bipolar	euploid-aneuploid mosaic	biparental
Embryo 14.B5	B	Chr14	25710	266	24583	230	496	0.53629	0.46371	0.951728	0.0579829	-	-	Bipolar	euploid-aneuploid mosaic	biparental
Embryo 14.B5	B	Chr15	25710	245	24583	236	481	0.509356	0.490644	0.675768	0.357663	-	-	Bipolar	euploid-aneuploid mosaic	biparental
Embryo 14.B5	B	Chr16	25710	197	24583	198	395	0.498734	0.501266	0.5	0.54007	-	-	Bipolar	euploid-aneuploid mosaic	biparental
Embryo 14.B5	B	Chr17	25710	244	24583	230	474	0.514768	0.485232	0.75456	0.27524	-	-	Bipolar	euploid-aneuploid mosaic	biparental
Embryo 14.B5	B	Chr18	25710	179	24583	181	360	0.497222	0.502778	0.478988	0.562802	-	-	Bipolar	euploid-aneuploid mosaic	biparental
Embryo 14.B5	B	Chr19	25710	145	24583	130	275	0.527273	0.472727	0.832681	0.199291	-	-	Bipolar	euploid-aneuploid mosaic	biparental
Embryo 14.B5	B	Chr20	25710	228	24583	174	402	0.567164	0.432836	0.996992	0.00406406	-	-	Bipolar	euploid-aneuploid mosaic	biparental
Embryo 14.B5	B	ChrUn	25710	55	24583	64	119	0.462185	0.537815	0.231744	0.820321	-	-	Bipolar	euploid-aneuploid mosaic	biparental
Embryo 14.B5	B	ChrX	25710	189	24583	49	238	0.794118	0.205882	1	6.96004e-21	-	sig	Bipolar	euploid-aneuploid mosaic	biparental
Embryo 14.B6	B	Chr1	25710	456	24583	502	958	0.475992	0.524008	0.0729697	0.935578	-	-	Bipolar	euploid-aneuploid mosaic	biparental
Embryo 14.B6	B	Chr2	25710	466	24583	418	884	0.527149	0.472851	0.950356	0.0569385	-	-	Bipolar	euploid-aneuploid mosaic	biparental
Embryo 14.B6	B	Chr3	25710	370	24583	379	749	0.493992	0.506008	0.385035	0.642577	-	-	Bipolar	euploid-aneuploid mosaic	biparental
Embryo 14.B6	B	Chr4	25710	380	24583	392	772	0.492228	0.507772	0.346103	0.680051	-	-	Bipolar	euploid-aneuploid mosaic	biparental
Embryo 14.B6	B	Chr5	25710	373	24583	416	789	0.47275	0.52725	0.0674005	0.941405	-	-	Bipolar	euploid-aneuploid mosaic	biparental
Embryo 14.B6	B	Chr6	25710	349	24583	330	679	0.513991	0.486009	0.778605	0.244867	-	-	Bipolar	euploid-aneuploid mosaic	biparental
Embryo 14.B6	B	Chr7	25710	351	24583	326	677	0.518464	0.481536	0.841166	0.178166	-	-	Bipolar	euploid-aneuploid mosaic	biparental
Embryo 14.B6	B	Chr8	25710	309	24583	295	604	0.511589	0.488411	0.729165	0.298434	-	-	Bipolar	euploid-aneuploid mosaic	biparental
Embryo 14.B6	B	Chr9	25710	298	24583	343	641	0.464899	0.535101	0.0410744	0.965425	-	-	Bipolar	euploid-aneuploid mosaic	biparental
Embryo 14.B6	B	Chr10	25710	227	24583	217	444	0.511261	0.488739	0.699153	0.33467	-	-	Bipolar	euploid-aneuploid mosaic	biparental
Embryo 14.B6	B	Chr11	25710	291	24583	294	585	0.497436	0.502564	0.467054	0.565668	-	-	Bipolar	euploid-aneuploid mosaic	biparental
Embryo 14.B6	B	Chr12	25710	264	24583	271	535	0.493458	0.506542	0.397677	0.635262	-	-	Bipolar	euploid-aneuploid mosaic	biparental
Embryo 14.B6	B	Chr13	25710	280	24583	243	523	0.535373	0.464627	0.951753	0.0576812	-	-	Bipolar	euploid-aneuploid mosaic	biparental
Embryo 14.B6	B	Chr14	25710	293	24583	276	569	0.514938	0.485062	0.774741	0.251206	-	-	Bipolar	euploid-aneuploid mosaic	biparental
Embryo 14.B6	B	Chr15	25710	206	24583	244	450	0.457778	0.542222	0.0405049	0.967064	-	-	Bipolar	euploid-aneuploid mosaic	biparental
Embryo 14.B6	B	Chr16	25710	214	24583	193	407	0.525799	0.474201	0.862263	0.160755	-	-	Bipolar	euploid-aneuploid mosaic	biparental
Embryo 14.B6	B	Chr17	25710	237	24583	248	485	0.48866	0.51134	0.324909	0.707063	-	-	Bipolar	euploid-aneuploid mosaic	biparental
Embryo 14.B6	B	Chr18	25710	197	24583	167	364	0.541209	0.458791	0.947967	0.0641966	-	-	Bipolar	euploid-aneuploid mosaic	biparental
Embryo 14.B6	B	Chr19	25710	183	24583	119	302	0.60596	0.39404	0.999913	0.000137604	-	-	Bipolar	euploid-aneuploid mosaic	biparental
Embryo 14.B6	B	Chr20	25710	231	24583	182	413	0.559322	0.440678	0.993108	0.00903654	-	-	Bipolar	euploid-aneuploid mosaic	biparental
Embryo 14.B6	B	ChrUn	25710	63	24583	64	127	0.496063	0.503937	0.5	0.570386	-	-	Bipolar	euploid-aneuploid mosaic	biparental
Embryo 14.B6	B	ChrX	25710	216	24583	40	256	0.84375	0.15625	1	1.10925e-30	-	sig	Bipolar	euploid-aneuploid mosaic	biparental
Embryo 14.B7	B	Chr1	25710	466	24583	405	871	0.535017	0.464983	0.9822	0.0209943	-	-	Bipolar	euploid-aneuploid mosaic	biparental
Embryo 14.B7	B	Chr2	25710	414	24583	371	785	0.527389	0.472611	0.941871	0.0669053	-	-	Bipolar	euploid-aneuploid mosaic	biparental
Embryo 14.B7	B	Chr3	25710	380	24583	391	771	0.492866	0.507134	0.359383	0.667177	-	-	Bipolar	euploid-aneuploid mosaic	biparental
Embryo 14.B7	B	Chr4	25710	321	24583	323	644	0.498447	0.501553	0.484286	0.547046	-	-	Bipolar	euploid-aneuploid mosaic	biparental
Embryo 14.B7	B	Chr5	25710	308	24583	311	619	0.497577	0.502423	0.467969	0.563856	-	-	Bipolar	euploid-aneuploid mosaic	biparental
Embryo 14.B7	B	Chr6	25710	332	24583	324	656	0.506098	0.493902	0.637338	0.392322	-	-	Bipolar	euploid-aneuploid mosaic	biparental
Embryo 14.B7	B	Chr7	25710	337	24583	304	641	0.525741	0.474259	0.910374	0.103111	-	-	Bipolar	euploid-aneuploid mosaic	biparental
Embryo 14.B7	B	Chr8	25710	261	24583	296	557	0.468582	0.531418	0.0748124	0.936454	-	-	Bipolar	euploid-aneuploid mosaic	biparental
Embryo 14.B7	B	Chr9	25710	251	24583	298	549	0.457195	0.542805	0.0247602	0.979798	-	-	Bipolar	euploid-aneuploid mosaic	biparental
Embryo 14.B7	B	Chr10	25710	184	24583	173	357	0.515406	0.484594	0.737292	0.298345	-	-	Bipolar	euploid-aneuploid mosaic	biparental
Embryo 14.B7	B	Chr11	25710	218	24583	269	487	0.447639	0.552361	0.0116852	0.990818	-	-	Bipolar	euploid-aneuploid mosaic	biparental
Embryo 14.B7	B	Chr12	25710	282	24583	283	565	0.499115	0.500885	0.5	0.533523	-	-	Bipolar	euploid-aneuploid mosaic	biparental
Embryo 14.B7	B	Chr13	25710	242	24583	233	475	0.509474	0.490526	0.676799	0.356806	-	-	Bipolar	euploid-aneuploid mosaic	biparental
Embryo 14.B7	B	Chr14	25710	249	24583	202	451	0.552106	0.447894	0.98815	0.0150969	-	-	Bipolar	euploid-aneuploid mosaic	biparental
Embryo 14.B7	B	Chr15	25710	208	24583	182	390	0.533333	0.466667	0.914258	0.102741	-	-	Bipolar	euploid-aneuploid mosaic	biparental
Embryo 14.B7	B	Chr16	25710	176	24583	167	343	0.51312	0.48688	0.705352	0.332917	-	-	Bipolar	euploid-aneuploid mosaic	biparental
Embryo 14.B7	B	Chr17	25710	217	24583	233	450	0.482222	0.517778	0.239771	0.788531	-	-	Bipolar	euploid-aneuploid mosaic	biparental
Embryo 14.B7	B	Chr18	25710	180	24583	175	355	0.507042	0.492958	0.624901	0.415956	-	-	Bipolar	euploid-aneuploid mosaic	biparental
Embryo 14.B7	B	Chr19	25710	133	24583	105	238	0.558824	0.441176	0.970046	0.039937	-	-	Bipolar	euploid-aneuploid mosaic	biparental
Embryo 14.B7	B	Chr20	25710	170	24583	172	342	0.497076	0.502924	0.478443	0.564419	-	-	Bipolar	euploid-aneuploid mosaic	biparental
Embryo 14.B7	B	ChrUn	25710	59	24583	58	117	0.504274	0.495726	0.573296	0.5	-	-	Bipolar	euploid-aneuploid mosaic	biparental
Embryo 14.B7	B	ChrX	25710	180	24583	36	216	0.833333	0.166667	1	1.58615e-24	-	sig	Bipolar	euploid-aneuploid mosaic	biparental
Embryo 15.B1	B	Chr1	25710	304	24583	90	394	0.771574	0.228426	1	1.49541e-28	-	sig	Bipolar	aneuploid	biparental
Embryo 15.B1	B	Chr2	25710	319	24583	401	720	0.443056	0.556944	0.00125747	0.99902	-	-	Bipolar	aneuploid	biparental
Embryo 15.B1	B	Chr3	25710	324	24583	317	641	0.50546	0.49454	0.623977	0.406345	-	-	Bipolar	aneuploid	biparental
Embryo 15.B1	B	Chr4	25710	308	24583	321	629	0.489666	0.510334	0.316175	0.711634	-	-	Bipolar	aneuploid	biparental
Embryo 15.B1	B	Chr5	25710	250	24583	287	537	0.465549	0.534451	0.0601094	0.949524	-	-	Bipolar	aneuploid	biparental
Embryo 15.B1	B	Chr6	25710	291	24583	300	591	0.492386	0.507614	0.371065	0.659573	-	-	Bipolar	aneuploid	biparental
Embryo 15.B1	B	Chr7	25710	281	24583	303	584	0.481164	0.518836	0.192436	0.829384	-	-	Bipolar	aneuploid	biparental
Embryo 15.B1	B	Chr8	25710	201	24583	288	489	0.411043	0.588957	4.83909e-05	0.999967	-	-	Bipolar	aneuploid	biparental
Embryo 15.B1	B	Chr9	25710	216	24583	255	471	0.458599	0.541401	0.0399223	0.9674	-	-	Bipolar	aneuploid	biparental
Embryo 15.B1	B	Chr10	25710	194	24583	165	359	0.54039	0.45961	0.943391	0.0696786	-	-	Bipolar	aneuploid	biparental
Embryo 15.B1	B	Chr11	25710	204	24583	215	419	0.486874	0.513126	0.312613	0.721116	-	-	Bipolar	aneuploid	biparental
Embryo 15.B1	B	Chr12	25710	224	24583	267	491	0.456212	0.543788	0.0289622	0.976521	-	-	Bipolar	aneuploid	biparental
Embryo 15.B1	B	Chr13	25710	202	24583	232	434	0.465438	0.534562	0.0819166	0.931677	-	-	Bipolar	aneuploid	biparental
Embryo 15.B1	B	Chr14	25710	206	24583	223	429	0.480186	0.519814	0.219931	0.807578	-	-	Bipolar	aneuploid	biparental
Embryo 15.B1	B	Chr15	25710	171	24583	232	403	0.424318	0.575682	0.00137784	0.999012	-	-	Bipolar	aneuploid	biparental
Embryo 15.B1	B	Chr16	25710	139	24583	162	301	0.461794	0.538206	0.102351	0.916773	-	-	Bipolar	aneuploid	biparental
Embryo 15.B1	B	Chr17	25710	187	24583	190	377	0.496021	0.503979	0.458988	0.581592	-	-	Bipolar	aneuploid	biparental
Embryo 15.B1	B	Chr18	25710	114	24583	152	266	0.428571	0.571429	0.0115559	0.991685	-	-	Bipolar	aneuploid	biparental
Embryo 15.B1	B	Chr19	25710	138	24583	104	242	0.570248	0.429752	0.987872	0.0168396	-	-	Bipolar	aneuploid	biparental
Embryo 15.B1	B	Chr20	25710	167	24583	171	338	0.494083	0.505917	0.435204	0.607151	-	-	Bipolar	aneuploid	biparental
Embryo 15.B1	B	ChrUn	25710	63	24583	69	132	0.477273	0.522727	0.331793	0.728746	-	-	Bipolar	aneuploid	biparental
Embryo 15.B1	B	ChrX	25710	186	24583	177	363	0.512397	0.487603	0.700131	0.337312	-	-	Bipolar	aneuploid	biparental
Embryo 15.B2	B	Chr1	25710	387	24583	120	507	0.763314	0.236686	1	4.47038e-34	-	sig	Bipolar	aneuploid	biparental
Embryo 15.B2	B	Chr2	25710	456	24583	563	1019	0.447498	0.552502	0.000444716	0.999646	-	-	Bipolar	aneuploid	biparental
Embryo 15.B2	B	Chr3	25710	440	24583	440	880	0.5	0.5	0.513445	0.513445	-	-	Bipolar	aneuploid	biparental
Embryo 15.B2	B	Chr4	25710	415	24583	443	858	0.483683	0.516317	0.178329	0.838923	-	-	Bipolar	aneuploid	biparental
Embryo 15.B2	B	Chr5	25710	404	24583	415	819	0.493284	0.506716	0.363396	0.662494	-	-	Bipolar	aneuploid	biparental
Embryo 15.B2	B	Chr6	25710	338	24583	430	768	0.440104	0.559896	0.000505976	0.99961	-	-	Bipolar	aneuploid	biparental
Embryo 15.B2	B	Chr7	25710	297	24583	396	693	0.428571	0.571429	9.63075e-05	0.999929	-	-	Bipolar	aneuploid	biparental
Embryo 15.B2	B	Chr8	25710	324	24583	365	689	0.470247	0.529753	0.0637391	0.945242	-	-	Bipolar	aneuploid	biparental
Embryo 15.B2	B	Chr9	25710	328	24583	381	709	0.462623	0.537377	0.0253774	0.978758	-	-	Bipolar	aneuploid	biparental
Embryo 15.B2	B	Chr10	25710	229	24583	269	498	0.459839	0.540161	0.0402118	0.966968	-	-	Bipolar	aneuploid	biparental
Embryo 15.B2	B	Chr11	25710	277	24583	327	604	0.458609	0.541391	0.0230432	0.981058	-	-	Bipolar	aneuploid	biparental
Embryo 15.B2	B	Chr12	25710	274	24583	354	628	0.436306	0.563694	0.000799187	0.999395	-	-	Bipolar	aneuploid	biparental
Embryo 15.B2	B	Chr13	25710	260	24583	304	564	0.460993	0.539007	0.0350521	0.970991	-	-	Bipolar	aneuploid	biparental
Embryo 15.B2	B	Chr14	25710	265	24583	290	555	0.477477	0.522523	0.154161	0.865133	-	-	Bipolar	aneuploid	biparental
Embryo 15.B2	B	Chr15	25710	205	24583	257	462	0.443723	0.556277	0.00878103	0.993207	-	-	Bipolar	aneuploid	biparental
Embryo 15.B2	B	Chr16	25710	193	24583	201	394	0.489848	0.510152	0.362198	0.674847	-	-	Bipolar	aneuploid	biparental
Embryo 15.B2	B	Chr17	25710	232	24583	302	534	0.434457	0.565543	0.00139657	0.998953	-	-	Bipolar	aneuploid	biparental
Embryo 15.B2	B	Chr18	25710	183	24583	222	405	0.451852	0.548148	0.0294302	0.97664	-	-	Bipolar	aneuploid	biparental
Embryo 15.B2	B	Chr19	25710	163	24583	155	318	0.512579	0.487421	0.693079	0.347362	-	-	Bipolar	aneuploid	biparental
Embryo 15.B2	B	Chr20	25710	234	24583	222	456	0.513158	0.486842	0.728642	0.303258	-	-	Bipolar	aneuploid	biparental
Embryo 15.B2	B	ChrUn	25710	59	24583	84	143	0.412587	0.587413	0.0221865	0.985334	-	-	Bipolar	aneuploid	biparental
Embryo 15.B2	B	ChrX	25710	178	24583	208	386	0.46114	0.53886	0.0699134	0.942759	-	-	Bipolar	aneuploid	biparental
Embryo 15.B3	B	Chr1	25710	281	24583	65	346	0.812139	0.187861	1	1.95089e-33	-	sig	Bipolar	aneuploid	biparental
Embryo 15.B3	B	Chr2	25710	318	24583	376	694	0.458213	0.541787	0.0152073	0.987477	-	-	Bipolar	aneuploid	biparental
Embryo 15.B3	B	Chr3	25710	281	24583	313	594	0.473064	0.526936	0.101677	0.912158	-	-	Bipolar	aneuploid	biparental
Embryo 15.B3	B	Chr4	25710	320	24583	341	661	0.484115	0.515885	0.218323	0.80391	-	-	Bipolar	aneuploid	biparental
Embryo 15.B3	B	Chr5	25710	286	24583	272	558	0.512545	0.487455	0.737267	0.291065	-	-	Bipolar	aneuploid	biparental
Embryo 15.B3	B	Chr6	25710	247	24583	303	550	0.449091	0.550909	0.0094674	0.992498	-	-	Bipolar	aneuploid	biparental
Embryo 15.B3	B	Chr7	25710	259	24583	277	536	0.483209	0.516791	0.231403	0.794072	-	-	Bipolar	aneuploid	biparental
Embryo 15.B3	B	Chr8	25710	234	24583	258	492	0.47561	0.52439	0.149884	0.870158	-	-	Bipolar	aneuploid	biparental
Embryo 15.B3	B	Chr9	25710	235	24583	298	533	0.440901	0.559099	0.00359258	0.99724	-	-	Bipolar	aneuploid	biparental
Embryo 15.B3	B	Chr10	25710	160	24583	182	342	0.467836	0.532164	0.128056	0.893225	-	-	Bipolar	aneuploid	biparental
Embryo 15.B3	B	Chr11	25710	197	24583	222	419	0.470167	0.529833	0.120485	0.898018	-	-	Bipolar	aneuploid	biparental
Embryo 15.B3	B	Chr12	25710	197	24583	230	427	0.461358	0.538642	0.0606895	0.95011	-	-	Bipolar	aneuploid	biparental
Embryo 15.B3	B	Chr13	25710	187	24583	176	363	0.515152	0.484848	0.735571	0.299869	-	-	Bipolar	aneuploid	biparental
Embryo 15.B3	B	Chr14	25710	183	24583	221	404	0.45297	0.54703	0.0327575	0.973897	-	-	Bipolar	aneuploid	biparental
Embryo 15.B3	B	Chr15	25710	185	24583	185	370	0.5	0.5	0.520726	0.520726	-	-	Bipolar	aneuploid	biparental
Embryo 15.B3	B	Chr16	25710	117	24583	141	258	0.453488	0.546512	0.0760143	0.940282	-	-	Bipolar	aneuploid	biparental
Embryo 15.B3	B	Chr17	25710	187	24583	214	401	0.466334	0.533666	0.0970471	0.919023	-	-	Bipolar	aneuploid	biparental
Embryo 15.B3	B	Chr18	25710	146	24583	144	290	0.503448	0.496552	0.569899	0.476593	-	-	Bipolar	aneuploid	biparental
Embryo 15.B3	B	Chr19	25710	86	24583	85	171	0.502924	0.497076	0.56075	0.5	-	-	Bipolar	aneuploid	biparental
Embryo 15.B3	B	Chr20	25710	198	24583	159	357	0.554622	0.445378	0.982944	0.022078	-	-	Bipolar	aneuploid	biparental
Embryo 15.B3	B	ChrUn	25710	35	24583	42	77	0.454545	0.545455	0.247191	0.818984	-	-	Bipolar	aneuploid	biparental
Embryo 15.B3	B	ChrX	25710	153	24583	197	350	0.437143	0.562857	0.0107014	0.991982	-	-	Bipolar	aneuploid	biparental
Embryo 15.PB1	PB	Chr1	25710	867	24583	183	1050	0.825714	0.174286	1	3.08924e-107	-	sig	Bipolar	aneuploid	biparental
Embryo 15.PB1	PB	Chr2	25710	770	24583	179	949	0.81138	0.18862	1	3.33995e-88	-	sig	Bipolar	aneuploid	biparental
Embryo 15.PB1	PB	Chr3	25710	672	24583	179	851	0.789659	0.210341	1	3.98221e-68	-	sig	Bipolar	aneuploid	biparental
Embryo 15.PB1	PB	Chr4	25710	738	24583	166	904	0.816372	0.183628	1	5.3274e-87	-	sig	Bipolar	aneuploid	biparental
Embryo 15.PB1	PB	Chr5	25710	618	24583	168	786	0.78626	0.21374	1	1.53821e-61	-	sig	Bipolar	aneuploid	biparental
Embryo 15.PB1	PB	Chr6	25710	620	24583	148	768	0.807292	0.192708	1	9.21903e-70	-	sig	Bipolar	aneuploid	biparental
Embryo 15.PB1	PB	Chr7	25710	566	24583	152	718	0.788301	0.211699	1	3.31081e-57	-	sig	Bipolar	aneuploid	biparental
Embryo 15.PB1	PB	Chr8	25710	569	24583	163	732	0.777322	0.222678	1	8.27394e-54	-	sig	Bipolar	aneuploid	biparental
Embryo 15.PB1	PB	Chr9	25710	544	24583	148	692	0.786127	0.213873	1	2.40432e-54	-	sig	Bipolar	aneuploid	biparental
Embryo 15.PB1	PB	Chr10	25710	353	24583	114	467	0.755889	0.244111	1	8.68797e-30	-	sig	Bipolar	aneuploid	biparental
Embryo 15.PB1	PB	Chr11	25710	504	24583	112	616	0.818182	0.181818	1	1.3737e-60	-	sig	Bipolar	aneuploid	biparental
Embryo 15.PB1	PB	Chr12	25710	519	24583	129	648	0.800926	0.199074	1	1.2946e-56	-	sig	Bipolar	aneuploid	biparental
Embryo 15.PB1	PB	Chr13	25710	425	24583	100	525	0.809524	0.190476	1	5.49165e-49	-	sig	Bipolar	aneuploid	biparental
Embryo 15.PB1	PB	Chr14	25710	430	24583	111	541	0.794824	0.205176	1	1.37e-45	-	sig	Bipolar	aneuploid	biparental
Embryo 15.PB1	PB	Chr15	25710	393	24583	114	507	0.775148	0.224852	1	3.2238e-37	-	sig	Bipolar	aneuploid	biparental
Embryo 15.PB1	PB	Chr16	25710	307	24583	97	404	0.759901	0.240099	1	8.38326e-27	-	sig	Bipolar	aneuploid	biparental
Embryo 15.PB1	PB	Chr17	25710	447	24583	108	555	0.805405	0.194595	1	2.90986e-50	-	sig	Bipolar	aneuploid	biparental
Embryo 15.PB1	PB	Chr18	25710	316	24583	81	397	0.79597	0.20403	1	3.51267e-34	-	sig	Bipolar	aneuploid	biparental
Embryo 15.PB1	PB	Chr19	25710	160	24583	57	217	0.737327	0.262673	1	8.30792e-13	-	sig	Bipolar	aneuploid	biparental
Embryo 15.PB1	PB	Chr20	25710	378	24583	73	451	0.838137	0.161863	1	5.67835e-51	-	sig	Bipolar	aneuploid	biparental
Embryo 15.PB1	PB	ChrUn	25710	119	24583	39	158	0.753165	0.246835	1	6.55978e-11	-	sig	Bipolar	aneuploid	biparental
Embryo 15.PB1	PB	ChrX	25710	361	24583	77	438	0.824201	0.175799	1	2.49557e-45	-	sig	Bipolar	aneuploid	biparental
Embryo 16.B1	B	Chr1	25710	213	24583	193	406	0.524631	0.475369	0.851348	0.172858	-	-	Multipolar	euploid-aneuploid mosaic	biparental
Embryo 16.B1	B	Chr2	25710	221	24583	196	417	0.529976	0.470024	0.898559	0.119923	-	-	Multipolar	euploid-aneuploid mosaic	biparental
Embryo 16.B1	B	Chr3	25710	155	24583	147	302	0.513245	0.486755	0.697696	0.34358	-	-	Multipolar	euploid-aneuploid mosaic	biparental
Embryo 16.B1	B	Chr4	25710	173	24583	140	313	0.552716	0.447284	0.972771	0.03516	-	-	Multipolar	euploid-aneuploid mosaic	biparental
Embryo 16.B1	B	Chr5	25710	160	24583	156	316	0.506329	0.493671	0.610723	0.433009	-	-	Multipolar	euploid-aneuploid mosaic	biparental
Embryo 16.B1	B	Chr6	25710	164	24583	144	308	0.532468	0.467532	0.884293	0.139476	-	-	Multipolar	euploid-aneuploid mosaic	biparental
Embryo 16.B1	B	Chr7	25710	149	24583	142	291	0.512027	0.487973	0.680416	0.362555	-	-	Multipolar	euploid-aneuploid mosaic	biparental
Embryo 16.B1	B	Chr8	25710	134	24583	172	306	0.437908	0.562092	0.0171232	0.987189	-	-	Multipolar	euploid-aneuploid mosaic	biparental
Embryo 16.B1	B	Chr9	25710	138	24583	128	266	0.518797	0.481203	0.749951	0.290576	-	-	Multipolar	euploid-aneuploid mosaic	biparental
Embryo 16.B1	B	Chr10	25710	92	24583	71	163	0.564417	0.435583	0.957728	0.0584772	-	-	Multipolar	euploid-aneuploid mosaic	biparental
Embryo 16.B1	B	Chr11	25710	113	24583	124	237	0.476793	0.523207	0.258028	0.78212	-	-	Multipolar	euploid-aneuploid mosaic	biparental
Embryo 16.B1	B	Chr12	25710	122	24583	141	263	0.463878	0.536122	0.133498	0.891297	-	-	Multipolar	euploid-aneuploid mosaic	biparental
Embryo 16.B1	B	Chr13	25710	86	24583	105	191	0.450262	0.549738	0.0963168	0.926169	-	-	Multipolar	euploid-aneuploid mosaic	biparental
Embryo 16.B1	B	Chr14	25710	98	24583	106	204	0.480392	0.519608	0.312087	0.735643	-	-	Multipolar	euploid-aneuploid mosaic	biparental
Embryo 16.B1	B	Chr15	25710	88	24583	125	213	0.413146	0.586854	0.00672486	0.995469	-	-	Multipolar	euploid-aneuploid mosaic	biparental
Embryo 16.B1	B	Chr16	25710	68	24583	90	158	0.43038	0.56962	0.0472373	0.966529	-	-	Multipolar	euploid-aneuploid mosaic	biparental
Embryo 16.B1	B	Chr17	25710	102	24583	99	201	0.507463	0.492537	0.61104	0.44393	-	-	Multipolar	euploid-aneuploid mosaic	biparental
Embryo 16.B1	B	Chr18	25710	88	24583	80	168	0.52381	0.47619	0.756217	0.294643	-	-	Multipolar	euploid-aneuploid mosaic	biparental
Embryo 16.B1	B	Chr19	25710	45	24583	50	95	0.473684	0.526316	0.340871	0.730803	-	-	Multipolar	euploid-aneuploid mosaic	biparental
Embryo 16.B1	B	Chr20	25710	89	24583	85	174	0.511494	0.488506	0.647616	0.410085	-	-	Multipolar	euploid-aneuploid mosaic	biparental
Embryo 16.B1	B	ChrUn	25710	17	24583	39	56	0.303571	0.696429	0.00228077	0.999079	-	-	Multipolar	euploid-aneuploid mosaic	biparental
Embryo 16.B1	B	ChrX	25710	77	24583	17	94	0.819149	0.180851	1	1.35232e-10	-	sig	Multipolar	euploid-aneuploid mosaic	biparental
Embryo 16.B2	B	Chr1	25710	257	24583	262	519	0.495183	0.504817	0.430323	0.603852	-	-	Multipolar	euploid-aneuploid mosaic	biparental
Embryo 16.B2	B	Chr2	25710	230	24583	243	473	0.486258	0.513742	0.290579	0.7401	-	-	Multipolar	euploid-aneuploid mosaic	biparental
Embryo 16.B2	B	Chr3	25710	199	24583	35	234	0.850427	0.149573	1	2.43921e-29	-	sig	Multipolar	euploid-aneuploid mosaic	biparental
Embryo 16.B2	B	Chr4	25710	46	24583	161	207	0.222222	0.777778	1.87639e-16	1	sig	-	Multipolar	euploid-aneuploid mosaic	biparental
Embryo 16.B2	B	Chr5	25710	161	24583	45	206	0.781553	0.218447	1	8.26968e-17	-	sig	Multipolar	euploid-aneuploid mosaic	biparental
Embryo 16.B2	B	Chr6	25710	205	24583	199	404	0.507426	0.492574	0.636155	0.401792	-	-	Multipolar	euploid-aneuploid mosaic	biparental
Embryo 16.B2	B	Chr7	25710	153	24583	193	346	0.442197	0.557803	0.017936	0.986316	-	-	Multipolar	euploid-aneuploid mosaic	biparental
Embryo 16.B2	B	Chr8	25710	203	24583	209	412	0.492718	0.507282	0.402731	0.634879	-	-	Multipolar	euploid-aneuploid mosaic	biparental
Embryo 16.B2	B	Chr9	25710	151	24583	197	348	0.433908	0.566092	0.00786647	0.994177	-	-	Multipolar	euploid-aneuploid mosaic	biparental
Embryo 16.B2	B	Chr10	25710	21	24583	88	109	0.192661	0.807339	3.05635e-11	1	sig	-	Multipolar	euploid-aneuploid mosaic	biparental
Embryo 16.B2	B	Chr11	25710	173	24583	165	338	0.511834	0.488166	0.687736	0.351724	-	-	Multipolar	euploid-aneuploid mosaic	biparental
Embryo 16.B2	B	Chr12	25710	151	24583	34	185	0.816216	0.183784	1	4.23925e-19	-	sig	Multipolar	euploid-aneuploid mosaic	biparental
Embryo 16.B2	B	Chr13	25710	106	24583	27	133	0.796992	0.203008	1	1.4563e-12	-	sig	Multipolar	euploid-aneuploid mosaic	biparental
Embryo 16.B2	B	Chr14	25710	141	24583	134	275	0.512727	0.487273	0.685205	0.358781	-	-	Multipolar	euploid-aneuploid mosaic	biparental
Embryo 16.B2	B	Chr15	25710	117	24583	157	274	0.427007	0.572993	0.00915326	0.993446	-	-	Multipolar	euploid-aneuploid mosaic	biparental
Embryo 16.B2	B	Chr16	25710	92	24583	23	115	0.8	0.2	1	2.89354e-11	-	sig	Multipolar	euploid-aneuploid mosaic	biparental
Embryo 16.B2	B	Chr17	25710	108	24583	20	128	0.84375	0.15625	1	4.29431e-16	-	sig	Multipolar	euploid-aneuploid mosaic	biparental
Embryo 16.B2	B	Chr18	25710	120	24583	116	236	0.508475	0.491525	0.627549	0.422612	-	-	Multipolar	euploid-aneuploid mosaic	biparental
Embryo 16.B2	B	Chr19	25710	12	24583	46	58	0.206897	0.793103	4.10983e-06	0.999999	sig	-	Multipolar	euploid-aneuploid mosaic	biparental
Embryo 16.B2	B	Chr20	25710	115	24583	89	204	0.563725	0.436275	0.970779	0.0399015	-	-	Multipolar	euploid-aneuploid mosaic	biparental
Embryo 16.B2	B	ChrUn	25710	22	24583	32	54	0.407407	0.592593	0.110164	0.933163	-	-	Multipolar	euploid-aneuploid mosaic	biparental
Embryo 16.B2	B	ChrX	25710	102	24583	14	116	0.87931	0.12069	1	5.62854e-18	-	sig	Multipolar	euploid-aneuploid mosaic	biparental
Embryo 16.B3	B	Chr1	25710	252	24583	222	474	0.531646	0.468354	0.922796	0.091398	-	-	Multipolar	euploid-aneuploid mosaic	biparental
Embryo 16.B3	B	Chr2	25710	226	24583	231	457	0.49453	0.50547	0.425799	0.610499	-	-	Multipolar	euploid-aneuploid mosaic	biparental
Embryo 16.B3	B	Chr3	25710	157	24583	171	328	0.478659	0.521341	0.236466	0.796213	-	-	Multipolar	euploid-aneuploid mosaic	biparental
Embryo 16.B3	B	Chr4	25710	181	24583	163	344	0.526163	0.473837	0.847182	0.179691	-	-	Multipolar	euploid-aneuploid mosaic	biparental
Embryo 16.B3	B	Chr5	25710	174	24583	185	359	0.48468	0.51532	0.298857	0.736714	-	-	Multipolar	euploid-aneuploid mosaic	biparental
Embryo 16.B3	B	Chr6	25710	191	24583	188	379	0.503958	0.496042	0.581379	0.459096	-	-	Multipolar	euploid-aneuploid mosaic	biparental
Embryo 16.B3	B	Chr7	25710	144	24583	183	327	0.440367	0.559633	0.0177223	0.986593	-	-	Multipolar	euploid-aneuploid mosaic	biparental
Embryo 16.B3	B	Chr8	25710	155	24583	190	345	0.449275	0.550725	0.03351	0.973778	-	-	Multipolar	euploid-aneuploid mosaic	biparental
Embryo 16.B3	B	Chr9	25710	152	24583	181	333	0.456456	0.543544	0.0624029	0.949983	-	-	Multipolar	euploid-aneuploid mosaic	biparental
Embryo 16.B3	B	Chr10	25710	102	24583	105	207	0.492754	0.507246	0.444743	0.609461	-	-	Multipolar	euploid-aneuploid mosaic	biparental
Embryo 16.B3	B	Chr11	25710	123	24583	122	245	0.502041	0.497959	0.55082	0.5	-	-	Multipolar	euploid-aneuploid mosaic	biparental
Embryo 16.B3	B	Chr12	25710	134	24583	125	259	0.517375	0.482625	0.732781	0.309604	-	-	Multipolar	euploid-aneuploid mosaic	biparental
Embryo 16.B3	B	Chr13	25710	106	24583	120	226	0.469027	0.530973	0.193611	0.840807	-	-	Multipolar	euploid-aneuploid mosaic	biparental
Embryo 16.B3	B	Chr14	25710	105	24583	113	218	0.481651	0.518349	0.317765	0.728873	-	-	Multipolar	euploid-aneuploid mosaic	biparental
Embryo 16.B3	B	Chr15	25710	103	24583	119	222	0.463964	0.536036	0.157031	0.873084	-	-	Multipolar	euploid-aneuploid mosaic	biparental
Embryo 16.B3	B	Chr16	25710	83	24583	81	164	0.506098	0.493902	0.592565	0.468895	-	-	Multipolar	euploid-aneuploid mosaic	biparental
Embryo 16.B3	B	Chr17	25710	126	24583	76	202	0.623762	0.376238	0.999845	0.00026665	-	-	Multipolar	euploid-aneuploid mosaic	biparental
Embryo 16.B3	B	Chr18	25710	87	24583	97	184	0.472826	0.527174	0.253563	0.79126	-	-	Multipolar	euploid-aneuploid mosaic	biparental
Embryo 16.B3	B	Chr19	25710	51	24583	49	100	0.51	0.49	0.617823	0.460205	-	-	Multipolar	euploid-aneuploid mosaic	biparental
Embryo 16.B3	B	Chr20	25710	65	24583	80	145	0.448276	0.551724	0.122442	0.908127	-	-	Multipolar	euploid-aneuploid mosaic	biparental
Embryo 16.B3	B	ChrUn	25710	29	24583	37	66	0.439394	0.560606	0.194526	0.866094	-	-	Multipolar	euploid-aneuploid mosaic	biparental
Embryo 16.B3	B	ChrX	25710	92	24583	22	114	0.807018	0.192982	1	1.14159e-11	-	sig	Multipolar	euploid-aneuploid mosaic	biparental
Embryo 16.B4	B	Chr1	25710	141	24583	190	331	0.425982	0.574018	0.00411717	0.997046	-	-	Multipolar	euploid-aneuploid mosaic	biparental
Embryo 16.B4	B	Chr2	25710	164	24583	131	295	0.555932	0.444068	0.976215	0.0311316	-	-	Multipolar	euploid-aneuploid mosaic	biparental
Embryo 16.B4	B	Chr3	25710	181	24583	142	323	0.560372	0.439628	0.987058	0.0171606	-	-	Multipolar	euploid-aneuploid mosaic	biparental
Embryo 16.B4	B	Chr4	25710	155	24583	190	345	0.449275	0.550725	0.03351	0.973778	-	-	Multipolar	euploid-aneuploid mosaic	biparental
Embryo 16.B4	B	Chr5	25710	129	24583	170	299	0.431438	0.568562	0.0102769	0.992498	-	-	Multipolar	euploid-aneuploid mosaic	biparental
Embryo 16.B4	B	Chr6	25710	169	24583	147	316	0.53481	0.46519	0.902181	0.118709	-	-	Multipolar	euploid-aneuploid mosaic	biparental
Embryo 16.B4	B	Chr7	25710	126	24583	101	227	0.555066	0.444934	0.95791	0.0554864	-	-	Multipolar	euploid-aneuploid mosaic	biparental
Embryo 16.B4	B	Chr8	25710	137	24583	131	268	0.511194	0.488806	0.665486	0.380055	-	-	Multipolar	euploid-aneuploid mosaic	biparental
Embryo 16.B4	B	Chr9	25710	138	24583	144	282	0.489362	0.510638	0.382979	0.661566	-	-	Multipolar	euploid-aneuploid mosaic	biparental
Embryo 16.B4	B	Chr10	25710	77	24583	64	141	0.546099	0.453901	0.880856	0.156106	-	-	Multipolar	euploid-aneuploid mosaic	biparental
Embryo 16.B4	B	Chr11	25710	123	24583	122	245	0.502041	0.497959	0.55082	0.5	-	-	Multipolar	euploid-aneuploid mosaic	biparental
Embryo 16.B4	B	Chr12	25710	145	24583	122	267	0.543071	0.456929	0.929125	0.0890354	-	-	Multipolar	euploid-aneuploid mosaic	biparental
Embryo 16.B4	B	Chr13	25710	79	24583	95	174	0.454023	0.545977	0.127706	0.901331	-	-	Multipolar	euploid-aneuploid mosaic	biparental
Embryo 16.B4	B	Chr14	25710	140	24583	74	214	0.654206	0.345794	0.999998	3.78721e-06	-	sig	Multipolar	euploid-aneuploid mosaic	biparental
Embryo 16.B4	B	Chr15	25710	50	24583	71	121	0.413223	0.586777	0.0342968	0.977474	-	-	Multipolar	euploid-aneuploid mosaic	biparental
Embryo 16.B4	B	Chr16	25710	55	24583	92	147	0.37415	0.62585	0.00142871	0.999184	-	-	Multipolar	euploid-aneuploid mosaic	biparental
Embryo 16.B4	B	Chr17	25710	123	24583	110	233	0.527897	0.472103	0.820459	0.215923	-	-	Multipolar	euploid-aneuploid mosaic	biparental
Embryo 16.B4	B	Chr18	25710	104	24583	85	189	0.550265	0.449735	0.927235	0.0951457	-	-	Multipolar	euploid-aneuploid mosaic	biparental
Embryo 16.B4	B	Chr19	25710	29	24583	34	63	0.460317	0.539683	0.307328	0.775019	-	-	Multipolar	euploid-aneuploid mosaic	biparental
Embryo 16.B4	B	Chr20	25710	91	24583	87	178	0.511236	0.488764	0.646026	0.411083	-	-	Multipolar	euploid-aneuploid mosaic	biparental
Embryo 16.B4	B	ChrUn	25710	20	24583	27	47	0.425532	0.574468	0.190847	0.87852	-	-	Multipolar	euploid-aneuploid mosaic	biparental
Embryo 16.B4	B	ChrX	25710	88	24583	10	98	0.897959	0.102041	1	4.97033e-17	-	sig	Multipolar	euploid-aneuploid mosaic	biparental
Embryo 16.B5	B	Chr1	25710	62	24583	196	258	0.24031	0.75969	1.1161e-17	1	sig	-	Multipolar	euploid-aneuploid mosaic	biparental
Embryo 16.B5	B	Chr2	25710	9	24583	2	11	0.818182	0.181818	0.994141	0.0327148	-	-	Multipolar	euploid-aneuploid mosaic	biparental
Embryo 16.B5	B	Chr3	25710	232	24583	179	411	0.564477	0.435523	0.996173	0.00511601	-	-	Multipolar	euploid-aneuploid mosaic	biparental
Embryo 16.B5	B	Chr4	25710	218	24583	238	456	0.47807	0.52193	0.186808	0.837297	-	-	Multipolar	euploid-aneuploid mosaic	biparental
Embryo 16.B5	B	Chr5	25710	37	24583	160	197	0.187817	0.812183	9.94036e-20	1	sig	-	Multipolar	euploid-aneuploid mosaic	biparental
Embryo 16.B5	B	Chr6	25710	44	24583	162	206	0.213592	0.786408	2.27301e-17	1	sig	-	Multipolar	euploid-aneuploid mosaic	biparental
Embryo 16.B5	B	Chr7	25710	141	24583	42	183	0.770492	0.229508	1	5.23257e-14	-	sig	Multipolar	euploid-aneuploid mosaic	biparental
Embryo 16.B5	B	Chr8	25710	145	24583	164	309	0.469256	0.530744	0.152918	0.872408	-	-	Multipolar	euploid-aneuploid mosaic	biparental
Embryo 16.B5	B	Chr9					0			1	1	-	-	Multipolar	euploid-aneuploid mosaic	biparental
Embryo 16.B5	B	Chr10	25710	112	24583	103	215	0.52093	0.47907	0.752333	0.292724	-	-	Multipolar	euploid-aneuploid mosaic	biparental
Embryo 16.B5	B	Chr11	25710	0	24583	3	3	0	1	0.125	1	-	-	Multipolar	euploid-aneuploid mosaic	biparental
Embryo 16.B5	B	Chr12	25710	169	24583	138	307	0.550489	0.449511	0.966187	0.043348	-	-	Multipolar	euploid-aneuploid mosaic	biparental
Embryo 16.B5	B	Chr13	25710	29	24583	102	131	0.221374	0.778626	5.06305e-11	1	sig	-	Multipolar	euploid-aneuploid mosaic	biparental
Embryo 16.B5	B	Chr14	25710	103	24583	21	124	0.830645	0.169355	1	1.74776e-14	-	sig	Multipolar	euploid-aneuploid mosaic	biparental
Embryo 16.B5	B	Chr15	25710	132	24583	112	244	0.540984	0.459016	0.910648	0.111888	-	-	Multipolar	euploid-aneuploid mosaic	biparental
Embryo 16.B5	B	Chr16	25710	17	24583	53	70	0.242857	0.757143	9.59985e-06	0.999997	-	-	Multipolar	euploid-aneuploid mosaic	biparental
Embryo 16.B5	B	Chr17	25710	136	24583	136	272	0.5	0.5	0.524167	0.524167	-	-	Multipolar	euploid-aneuploid mosaic	biparental
Embryo 16.B5	B	Chr18	25710	21	24583	87	108	0.194444	0.805556	4.95159e-11	1	sig	-	Multipolar	euploid-aneuploid mosaic	biparental
Embryo 16.B5	B	Chr19	25710	51	24583	9	60	0.85	0.15	1	1.54252e-08	-	sig	Multipolar	euploid-aneuploid mosaic	biparental
Embryo 16.B5	B	Chr20	25710	18	24583	86	104	0.173077	0.826923	4.10996e-12	1	sig	-	Multipolar	euploid-aneuploid mosaic	biparental
Embryo 16.B5	B	ChrUn	25710	17	24583	19	36	0.472222	0.527778	0.43397	0.69114	-	-	Multipolar	euploid-aneuploid mosaic	biparental
Embryo 16.B5	B	ChrX	25710	0	24583	2	2	0	1	0.25	1	-	-	Multipolar	euploid-aneuploid mosaic	biparental
Embryo 16.B6	B	Chr1	25710	259	24583	61	320	0.809375	0.190625	1	1.72782e-30	-	sig	Multipolar	euploid-aneuploid mosaic	biparental
Embryo 16.B6	B	Chr2	25710	260	24583	273	533	0.487805	0.512195	0.30163	0.727858	-	-	Multipolar	euploid-aneuploid mosaic	biparental
Embryo 16.B6	B	Chr3	25710	47	24583	186	233	0.201717	0.798283	4.71368e-21	1	sig	-	Multipolar	euploid-aneuploid mosaic	biparental
Embryo 16.B6	B	Chr4	25710	198	24583	52	250	0.792	0.208	1	1.50901e-21	-	sig	Multipolar	euploid-aneuploid mosaic	biparental
Embryo 16.B6	B	Chr5	25710	199	24583	209	408	0.487745	0.512255	0.327982	0.706952	-	-	Multipolar	euploid-aneuploid mosaic	biparental
Embryo 16.B6	B	Chr6	25710	163	24583	42	205	0.795122	0.204878	1	2.51482e-18	-	sig	Multipolar	euploid-aneuploid mosaic	biparental
Embryo 16.B6	B	Chr7	25710	41	24583	164	205	0.2	0.8	6.37644e-19	1	sig	-	Multipolar	euploid-aneuploid mosaic	biparental
Embryo 16.B6	B	Chr8					0			1	1	-	-	Multipolar	euploid-aneuploid mosaic	biparental
Embryo 16.B6	B	Chr9	25710	193	24583	176	369	0.523035	0.476965	0.825625	0.202459	-	-	Multipolar	euploid-aneuploid mosaic	biparental
Embryo 16.B6	B	Chr10	25710	88	24583	17	105	0.838095	0.161905	1	4.97642e-13	-	sig	Multipolar	euploid-aneuploid mosaic	biparental
Embryo 16.B6	B	Chr11	25710	159	24583	171	330	0.481818	0.518182	0.272446	0.762862	-	-	Multipolar	euploid-aneuploid mosaic	biparental
Embryo 16.B6	B	Chr12	25710	28	24583	143	171	0.163743	0.836257	4.36936e-20	1	sig	-	Multipolar	euploid-aneuploid mosaic	biparental
Embryo 16.B6	B	Chr13	25710	154	24583	139	293	0.525597	0.474403	0.825027	0.206733	-	-	Multipolar	euploid-aneuploid mosaic	biparental
Embryo 16.B6	B	Chr14	25710	26	24583	106	132	0.19697	0.80303	5.84175e-13	1	sig	-	Multipolar	euploid-aneuploid mosaic	biparental
Embryo 16.B6	B	Chr15	25710	1	24583	2	3	0.333333	0.666667	0.5	0.875	-	-	Multipolar	euploid-aneuploid mosaic	biparental
Embryo 16.B6	B	Chr16	25710	99	24583	103	202	0.490099	0.509901	0.416445	0.637457	-	-	Multipolar	euploid-aneuploid mosaic	biparental
Embryo 16.B6	B	Chr17	25710	29	24583	143	172	0.168605	0.831395	1.30682e-19	1	sig	-	Multipolar	euploid-aneuploid mosaic	biparental
Embryo 16.B6	B	Chr18	25710	94	24583	20	114	0.824561	0.175439	1	5.84005e-13	-	sig	Multipolar	euploid-aneuploid mosaic	biparental
Embryo 16.B6	B	Chr19	25710	64	24583	66	130	0.492308	0.507692	0.465078	0.603709	-	-	Multipolar	euploid-aneuploid mosaic	biparental
Embryo 16.B6	B	Chr20	25710	91	24583	33	124	0.733871	0.266129	1	9.29636e-08	-	sig	Multipolar	euploid-aneuploid mosaic	biparental
Embryo 16.B6	B	ChrUn	25710	20	24583	20	40	0.5	0.5	0.562685	0.562685	-	-	Multipolar	euploid-aneuploid mosaic	biparental
Embryo 16.B6	B	ChrX	25710	113	24583	18	131	0.862595	0.137405	1	2.58135e-18	-	sig	Multipolar	euploid-aneuploid mosaic	biparental
Embryo 16.PB1	PB	Chr1	25710	310	24583	61	371	0.83558	0.16442	1	1.47675e-41	-	sig	Multipolar	euploid-aneuploid mosaic	biparental
Embryo 16.PB1	PB	Chr2	25710	314	24583	62	376	0.835106	0.164894	1	5.71601e-42	-	sig	Multipolar	euploid-aneuploid mosaic	biparental
Embryo 16.PB1	PB	Chr3	25710	251	24583	54	305	0.822951	0.177049	1	8.13374e-32	-	sig	Multipolar	euploid-aneuploid mosaic	biparental
Embryo 16.PB1	PB	Chr4	25710	235	24583	50	285	0.824561	0.175439	1	3.82831e-30	-	sig	Multipolar	euploid-aneuploid mosaic	biparental
Embryo 16.PB1	PB	Chr5	25710	241	24583	50	291	0.828179	0.171821	1	1.8619e-31	-	sig	Multipolar	euploid-aneuploid mosaic	biparental
Embryo 16.PB1	PB	Chr6	25710	230	24583	40	270	0.851852	0.148148	1	6.70065e-34	-	sig	Multipolar	euploid-aneuploid mosaic	biparental
Embryo 16.PB1	PB	Chr7	25710	200	24583	44	244	0.819672	0.180328	1	3.03227e-25	-	sig	Multipolar	euploid-aneuploid mosaic	biparental
Embryo 16.PB1	PB	Chr8	25710	217	24583	42	259	0.837838	0.162162	1	6.43743e-30	-	sig	Multipolar	euploid-aneuploid mosaic	biparental
Embryo 16.PB1	PB	Chr9	25710	195	24583	40	235	0.829787	0.170213	1	5.72144e-26	-	sig	Multipolar	euploid-aneuploid mosaic	biparental
Embryo 16.PB1	PB	Chr10	25710	118	24583	15	133	0.887218	0.112782	1	2.54738e-21	-	sig	Multipolar	euploid-aneuploid mosaic	biparental
Embryo 16.PB1	PB	Chr11	25710	164	24583	45	209	0.784689	0.215311	1	2.13352e-17	-	sig	Multipolar	euploid-aneuploid mosaic	biparental
Embryo 16.PB1	PB	Chr12	25710	182	24583	26	208	0.875	0.125	1	2.55669e-30	-	sig	Multipolar	euploid-aneuploid mosaic	biparental
Embryo 16.PB1	PB	Chr13	25710	173	24583	27	200	0.865	0.135	1	1.4427e-27	-	sig	Multipolar	euploid-aneuploid mosaic	biparental
Embryo 16.PB1	PB	Chr14	25710	139	24583	37	176	0.789773	0.210227	1	2.11308e-15	-	sig	Multipolar	euploid-aneuploid mosaic	biparental
Embryo 16.PB1	PB	Chr15	25710	141	24583	34	175	0.805714	0.194286	1	5.4898e-17	-	sig	Multipolar	euploid-aneuploid mosaic	biparental
Embryo 16.PB1	PB	Chr16	25710	95	24583	22	117	0.811966	0.188034	1	2.6572e-12	-	sig	Multipolar	euploid-aneuploid mosaic	biparental
Embryo 16.PB1	PB	Chr17	25710	167	24583	31	198	0.843434	0.156566	1	4.88283e-24	-	sig	Multipolar	euploid-aneuploid mosaic	biparental
Embryo 16.PB1	PB	Chr18	25710	131	24583	25	156	0.839744	0.160256	1	7.65945e-19	-	sig	Multipolar	euploid-aneuploid mosaic	biparental
Embryo 16.PB1	PB	Chr19	25710	49	24583	9	58	0.844828	0.155172	1	4.4797e-08	-	sig	Multipolar	euploid-aneuploid mosaic	biparental
Embryo 16.PB1	PB	Chr20	25710	113	24583	30	143	0.79021	0.20979	1	7.88651e-13	-	sig	Multipolar	euploid-aneuploid mosaic	biparental
Embryo 16.PB1	PB	ChrUn	25710	35	24583	18	53	0.660377	0.339623	0.99367	0.0135042	-	-	Multipolar	euploid-aneuploid mosaic	biparental
Embryo 16.PB1	PB	ChrX	25710	133	24583	19	152	0.875	0.125	1	1.47702e-22	-	sig	Multipolar	euploid-aneuploid mosaic	biparental
Embryo 17.B1	B	Chr1	25194	370	26028	330	700	0.528571	0.471429	0.939419	0.0702048	-	-	Multipolar	aneuploid	biparental
Embryo 17.B1	B	Chr2	25194	359	26028	301	660	0.543939	0.456061	0.989214	0.0132154	-	-	Multipolar	aneuploid	biparental
Embryo 17.B1	B	Chr3	25194	300	26028	290	590	0.508475	0.491525	0.674658	0.355513	-	-	Multipolar	aneuploid	biparental
Embryo 17.B1	B	Chr4	25194	245	26028	43	288	0.850694	0.149306	1	8.41213e-36	-	sig	Multipolar	aneuploid	biparental
Embryo 17.B1	B	Chr5	25194	241	26028	238	479	0.503132	0.496868	0.572497	0.463601	-	-	Multipolar	aneuploid	biparental
Embryo 17.B1	B	Chr6	25194	260	26028	279	539	0.482375	0.517625	0.219091	0.805498	-	-	Multipolar	aneuploid	biparental
Embryo 17.B1	B	Chr7	25194	293	26028	278	571	0.513135	0.486865	0.74842	0.278996	-	-	Multipolar	aneuploid	biparental
Embryo 17.B1	B	Chr8	25194	41	26028	161	202	0.20297	0.79703	2.61775e-18	1	sig	-	Multipolar	aneuploid	biparental
Embryo 17.B1	B	Chr9	25194	226	26028	207	433	0.52194	0.47806	0.831755	0.193524	-	-	Multipolar	aneuploid	biparental
Embryo 17.B1	B	Chr10	25194	194	26028	178	372	0.521505	0.478495	0.81094	0.218389	-	-	Multipolar	aneuploid	biparental
Embryo 17.B1	B	Chr11	25194	221	26028	192	413	0.535109	0.464891	0.930102	0.0840956	-	-	Multipolar	aneuploid	biparental
Embryo 17.B1	B	Chr12	25194	213	26028	207	420	0.507143	0.492857	0.633638	0.403643	-	-	Multipolar	aneuploid	biparental
Embryo 17.B1	B	Chr13	25194	191	26028	175	366	0.521858	0.478142	0.81288	0.216522	-	-	Multipolar	aneuploid	biparental
Embryo 17.B1	B	Chr14	25194	241	26028	179	420	0.57381	0.42619	0.998962	0.00143574	-	-	Multipolar	aneuploid	biparental
Embryo 17.B1	B	Chr15	25194	190	26028	166	356	0.533708	0.466292	0.907453	0.111396	-	-	Multipolar	aneuploid	biparental
Embryo 17.B1	B	Chr16	25194	177	26028	37	214	0.827103	0.172897	1	2.14124e-23	-	sig	Multipolar	aneuploid	biparental
Embryo 17.B1	B	Chr17	25194	195	26028	148	343	0.568513	0.431487	0.995276	0.00644299	-	-	Multipolar	aneuploid	biparental
Embryo 17.B1	B	Chr18	25194	168	26028	137	305	0.55082	0.44918	0.966636	0.0428334	-	-	Multipolar	aneuploid	biparental
Embryo 17.B1	B	Chr19	25194	100	26028	94	194	0.515464	0.484536	0.69231	0.359856	-	-	Multipolar	aneuploid	biparental
Embryo 17.B1	B	Chr20	25194	170	26028	139	309	0.550162	0.449838	0.965739	0.0438625	-	-	Multipolar	aneuploid	biparental
Embryo 17.B1	B	ChrUn	25194	38	26028	26	64	0.59375	0.40625	0.948289	0.0843215	-	-	Multipolar	aneuploid	biparental
Embryo 17.B1	B	ChrX	25194	107	26028	106	213	0.502347	0.497653	0.554479	0.5	-	-	Multipolar	aneuploid	biparental
Embryo 17.B2	B	Chr1	25194	374	26028	321	695	0.538129	0.461871	0.979775	0.0242388	-	-	Multipolar	aneuploid	biparental
Embryo 17.B2	B	Chr2	25194	305	26028	283	588	0.518707	0.481293	0.82856	0.193247	-	-	Multipolar	aneuploid	biparental
Embryo 17.B2	B	Chr3	25194	303	26028	262	565	0.536283	0.463717	0.961428	0.0461616	-	-	Multipolar	aneuploid	biparental
Embryo 17.B2	B	Chr4	25194	256	26028	54	310	0.825806	0.174194	1	6.6294e-33	-	sig	Multipolar	aneuploid	biparental
Embryo 17.B2	B	Chr5	25194	232	26028	245	477	0.486373	0.513627	0.291374	0.739222	-	-	Multipolar	aneuploid	biparental
Embryo 17.B2	B	Chr6	25194	260	26028	241	501	0.518962	0.481038	0.814206	0.21066	-	-	Multipolar	aneuploid	biparental
Embryo 17.B2	B	Chr7	25194	297	26028	249	546	0.543956	0.456044	0.982052	0.0220915	-	-	Multipolar	aneuploid	biparental
Embryo 17.B2	B	Chr8	25194	64	26028	192	256	0.25	0.75	2.44855e-16	1	sig	-	Multipolar	aneuploid	biparental
Embryo 17.B2	B	Chr9	25194	266	26028	195	461	0.577007	0.422993	0.99961	0.000545493	-	-	Multipolar	aneuploid	biparental
Embryo 17.B2	B	Chr10	25194	230	26028	196	426	0.539906	0.460094	0.955093	0.0548723	-	-	Multipolar	aneuploid	biparental
Embryo 17.B2	B	Chr11	25194	205	26028	204	409	0.501222	0.498778	0.539381	0.5	-	-	Multipolar	aneuploid	biparental
Embryo 17.B2	B	Chr12	25194	213	26028	195	408	0.522059	0.477941	0.82655	0.200013	-	-	Multipolar	aneuploid	biparental
Embryo 17.B2	B	Chr13	25194	180	26028	190	370	0.486486	0.513514	0.319962	0.716263	-	-	Multipolar	aneuploid	biparental
Embryo 17.B2	B	Chr14	25194	236	26028	212	448	0.526786	0.473214	0.881243	0.138588	-	-	Multipolar	aneuploid	biparental
Embryo 17.B2	B	Chr15	25194	177	26028	149	326	0.542945	0.457055	0.945952	0.0673445	-	-	Multipolar	aneuploid	biparental
Embryo 17.B2	B	Chr16	25194	164	26028	49	213	0.769953	0.230047	1	5.424e-16	-	sig	Multipolar	aneuploid	biparental
Embryo 17.B2	B	Chr17	25194	174	26028	143	317	0.548896	0.451104	0.96394	0.0459187	-	-	Multipolar	aneuploid	biparental
Embryo 17.B2	B	Chr18	25194	131	26028	126	257	0.509728	0.490272	0.645859	0.401511	-	-	Multipolar	aneuploid	biparental
Embryo 17.B2	B	Chr19	25194	90	26028	107	197	0.456853	0.543147	0.127123	0.900218	-	-	Multipolar	aneuploid	biparental
Embryo 17.B2	B	Chr20	25194	150	26028	164	314	0.477707	0.522293	0.231614	0.801345	-	-	Multipolar	aneuploid	biparental
Embryo 17.B2	B	ChrUn	25194	38	26028	28	66	0.575758	0.424242	0.912357	0.133906	-	-	Multipolar	aneuploid	biparental
Embryo 17.B2	B	ChrX	25194	102	26028	101	203	0.502463	0.497537	0.555795	0.5	-	-	Multipolar	aneuploid	biparental
Embryo 17.B3	B	Chr1	25194	4	26028	1	5	0.8	0.2	0.96875	0.1875	-	-	Multipolar	aneuploid	biparental
Embryo 17.B3	B	Chr2	25194	1	26028	1	2	0.5	0.5	0.75	0.75	-	-	Multipolar	aneuploid	biparental
Embryo 17.B3	B	Chr3	25194	2	26028	3	5	0.4	0.6	0.5	0.8125	-	-	Multipolar	aneuploid	biparental
Embryo 17.B3	B	Chr4	25194	1	26028	1	2	0.5	0.5	0.75	0.75	-	-	Multipolar	aneuploid	biparental
Embryo 17.B3	B	Chr5	25194	2	26028	2	4	0.5	0.5	0.6875	0.6875	-	-	Multipolar	aneuploid	biparental
Embryo 17.B3	B	Chr6	25194	1	26028	0	1	1	0	1	0.5	-	-	Multipolar	aneuploid	biparental
Embryo 17.B3	B	Chr7	25194	2	26028	2	4	0.5	0.5	0.6875	0.6875	-	-	Multipolar	aneuploid	biparental
Embryo 17.B3	B	Chr8	25194	2	26028	3	5	0.4	0.6	0.5	0.8125	-	-	Multipolar	aneuploid	biparental
Embryo 17.B3	B	Chr9					0			1	1	-	-	Multipolar	aneuploid	biparental
Embryo 17.B3	B	Chr10	25194	5	26028	0	5	1	0	1	0.03125	-	-	Multipolar	aneuploid	biparental
Embryo 17.B3	B	Chr11	25194	1	26028	0	1	1	0	1	0.5	-	-	Multipolar	aneuploid	biparental
Embryo 17.B3	B	Chr12	25194	0	26028	1	1	0	1	0.5	1	-	-	Multipolar	aneuploid	biparental
Embryo 17.B3	B	Chr13	25194	3	26028	1	4	0.75	0.25	0.9375	0.3125	-	-	Multipolar	aneuploid	biparental
Embryo 17.B3	B	Chr14	25194	1	26028	1	2	0.5	0.5	0.75	0.75	-	-	Multipolar	aneuploid	biparental
Embryo 17.B3	B	Chr15	25194	138	26028	677	815	0.169325	0.830675	2.04992e-86	1	sig	-	Multipolar	aneuploid	biparental
Embryo 17.B3	B	Chr16	25194	1	26028	1	2	0.5	0.5	0.75	0.75	-	-	Multipolar	aneuploid	biparental
Embryo 17.B3	B	Chr17	25194	2	26028	3	5	0.4	0.6	0.5	0.8125	-	-	Multipolar	aneuploid	biparental
Embryo 17.B3	B	Chr18	25194	0	26028	1	1	0	1	0.5	1	-	-	Multipolar	aneuploid	biparental
Embryo 17.B3	B	Chr19	25194	80	26028	299	379	0.211082	0.788918	3.76e-31	1	sig	-	Multipolar	aneuploid	biparental
Embryo 17.B3	B	Chr20	25194	2	26028	4	6	0.333333	0.666667	0.34375	0.890625	-	-	Multipolar	aneuploid	biparental
Embryo 17.B3	B	ChrUn	25194	2	26028	14	16	0.125	0.875	0.00209045	0.999741	-	-	Multipolar	aneuploid	biparental
Embryo 17.B3	B	ChrX					0			1	1	-	-	Multipolar	aneuploid	biparental
Embryo 17.B4	B	Chr1	25194	340	26028	298	638	0.532915	0.467085	0.955698	0.0522357	-	-	Multipolar	aneuploid	biparental
Embryo 17.B4	B	Chr2	25194	276	26028	247	523	0.527725	0.472275	0.905233	0.110391	-	-	Multipolar	aneuploid	biparental
Embryo 17.B4	B	Chr3	25194	284	26028	227	511	0.555773	0.444227	0.994887	0.00658059	-	-	Multipolar	aneuploid	biparental
Embryo 17.B4	B	Chr4	25194	242	26028	45	287	0.843206	0.156794	1	4.33996e-34	-	sig	Multipolar	aneuploid	biparental
Embryo 17.B4	B	Chr5	25194	222	26028	198	420	0.528571	0.471429	0.888766	0.130858	-	-	Multipolar	aneuploid	biparental
Embryo 17.B4	B	Chr6	25194	224	26028	192	416	0.538462	0.461538	0.947221	0.0642179	-	-	Multipolar	aneuploid	biparental
Embryo 17.B4	B	Chr7	25194	287	26028	256	543	0.528545	0.471455	0.915192	0.0989508	-	-	Multipolar	aneuploid	biparental
Embryo 17.B4	B	Chr8	25194	50	26028	127	177	0.282486	0.717514	3.24043e-09	1	sig	-	Multipolar	aneuploid	biparental
Embryo 17.B4	B	Chr9	25194	223	26028	197	420	0.530952	0.469048	0.906191	0.111234	-	-	Multipolar	aneuploid	biparental
Embryo 17.B4	B	Chr10	25194	224	26028	162	386	0.580311	0.419689	0.999343	0.000933344	-	-	Multipolar	aneuploid	biparental
Embryo 17.B4	B	Chr11	25194	201	26028	160	361	0.556787	0.443213	0.986535	0.0175615	-	-	Multipolar	aneuploid	biparental
Embryo 17.B4	B	Chr12	25194	194	26028	157	351	0.552707	0.447293	0.978811	0.0272545	-	-	Multipolar	aneuploid	biparental
Embryo 17.B4	B	Chr13	25194	196	26028	171	367	0.53406	0.46594	0.912681	0.105112	-	-	Multipolar	aneuploid	biparental
Embryo 17.B4	B	Chr14	25194	224	26028	178	402	0.557214	0.442786	0.990521	0.012343	-	-	Multipolar	aneuploid	biparental
Embryo 17.B4	B	Chr15	25194	154	26028	172	326	0.472393	0.527607	0.173221	0.853678	-	-	Multipolar	aneuploid	biparental
Embryo 17.B4	B	Chr16	25194	148	26028	36	184	0.804348	0.195652	1	1.25593e-17	-	sig	Multipolar	aneuploid	biparental
Embryo 17.B4	B	Chr17	25194	174	26028	129	303	0.574257	0.425743	0.99594	0.00567866	-	-	Multipolar	aneuploid	biparental
Embryo 17.B4	B	Chr18	25194	120	26028	116	236	0.508475	0.491525	0.627549	0.422612	-	-	Multipolar	aneuploid	biparental
Embryo 17.B4	B	Chr19	25194	79	26028	81	160	0.49375	0.50625	0.46851	0.593692	-	-	Multipolar	aneuploid	biparental
Embryo 17.B4	B	Chr20	25194	148	26028	105	253	0.58498	0.41502	0.997218	0.00407536	-	-	Multipolar	aneuploid	biparental
Embryo 17.B4	B	ChrUn	25194	38	26028	21	59	0.644068	0.355932	0.990831	0.0181716	-	-	Multipolar	aneuploid	biparental
Embryo 17.B4	B	ChrX	25194	149	26028	93	242	0.615702	0.384298	0.999883	0.000192761	-	-	Multipolar	aneuploid	biparental
Embryo 17.B5	B	Chr1	25194	361	26028	316	677	0.533235	0.466765	0.961502	0.0453759	-	-	Multipolar	aneuploid	biparental
Embryo 17.B5	B	Chr2	25194	329	26028	312	641	0.513261	0.486739	0.76143	0.263722	-	-	Multipolar	aneuploid	biparental
Embryo 17.B5	B	Chr3	25194	294	26028	276	570	0.515789	0.484211	0.78692	0.238232	-	-	Multipolar	aneuploid	biparental
Embryo 17.B5	B	Chr4	25194	293	26028	476	769	0.381014	0.618986	2.14595e-11	1	sig	-	Multipolar	aneuploid	biparental
Embryo 17.B5	B	Chr5	25194	277	26028	301	578	0.479239	0.520761	0.169369	0.850801	-	-	Multipolar	aneuploid	biparental
Embryo 17.B5	B	Chr6	25194	266	26028	277	543	0.489871	0.510129	0.33393	0.696692	-	-	Multipolar	aneuploid	biparental
Embryo 17.B5	B	Chr7	25194	269	26028	300	569	0.472759	0.527241	0.104237	0.910148	-	-	Multipolar	aneuploid	biparental
Embryo 17.B5	B	Chr8	25194	441	26028	249	690	0.63913	0.36087	1	1.25747e-13	-	sig	Multipolar	aneuploid	biparental
Embryo 17.B5	B	Chr9	25194	248	26028	216	464	0.534483	0.465517	0.937283	0.0750164	-	-	Multipolar	aneuploid	biparental
Embryo 17.B5	B	Chr10	25194	175	26028	187	362	0.483425	0.516575	0.281612	0.752754	-	-	Multipolar	aneuploid	biparental
Embryo 17.B5	B	Chr11	25194	188	26028	166	354	0.531073	0.468927	0.889255	0.132168	-	-	Multipolar	aneuploid	biparental
Embryo 17.B5	B	Chr12	25194	209	26028	194	403	0.51861	0.48139	0.787262	0.242803	-	-	Multipolar	aneuploid	biparental
Embryo 17.B5	B	Chr13	25194	179	26028	169	348	0.514368	0.485632	0.72226	0.314775	-	-	Multipolar	aneuploid	biparental
Embryo 17.B5	B	Chr14	25194	222	26028	226	448	0.495536	0.504464	0.443654	0.593356	-	-	Multipolar	aneuploid	biparental
Embryo 17.B5	B	Chr15	25194	299	26028	66	365	0.819178	0.180822	1	7.70051e-37	-	sig	Multipolar	aneuploid	biparental
Embryo 17.B5	B	Chr16	25194	130	26028	257	387	0.335917	0.664083	5.1537e-11	1	sig	-	Multipolar	aneuploid	biparental
Embryo 17.B5	B	Chr17	25194	183	26028	136	319	0.573668	0.426332	0.996448	0.00494971	-	-	Multipolar	aneuploid	biparental
Embryo 17.B5	B	Chr18	25194	136	26028	126	262	0.519084	0.480916	0.751578	0.28914	-	-	Multipolar	aneuploid	biparental
Embryo 17.B5	B	Chr19	25194	65	26028	12	77	0.844156	0.155844	1	2.95886e-10	-	sig	Multipolar	aneuploid	biparental
Embryo 17.B5	B	Chr20	25194	135	26028	124	259	0.521236	0.478764	0.772026	0.267219	-	-	Multipolar	aneuploid	biparental
Embryo 17.B5	B	ChrUn	25194	36	26028	37	73	0.493151	0.506849	0.5	0.592439	-	-	Multipolar	aneuploid	biparental
Embryo 17.B5	B	ChrX	25194	119	26028	121	240	0.495833	0.504167	0.474275	0.576749	-	-	Multipolar	aneuploid	biparental
Embryo 17.B7	B	Chr1					0			1	1	-	-	Multipolar	aneuploid	biparental
Embryo 17.B7	B	Chr2					0			1	1	-	-	Multipolar	aneuploid	biparental
Embryo 17.B7	B	Chr3					0			1	1	-	-	Multipolar	aneuploid	biparental
Embryo 17.B7	B	Chr4	25194	0	26028	2	2	0	1	0.25	1	-	-	Multipolar	aneuploid	biparental
Embryo 17.B7	B	Chr5					0			1	1	-	-	Multipolar	aneuploid	biparental
Embryo 17.B7	B	Chr6					0			1	1	-	-	Multipolar	aneuploid	biparental
Embryo 17.B7	B	Chr7	25194	1	26028	1	2	0.5	0.5	0.75	0.75	-	-	Multipolar	aneuploid	biparental
Embryo 17.B7	B	Chr8	25194	1	26028	0	1	1	0	1	0.5	-	-	Multipolar	aneuploid	biparental
Embryo 17.B7	B	Chr9					0			1	1	-	-	Multipolar	aneuploid	biparental
Embryo 17.B7	B	Chr10	25194	0	26028	1	1	0	1	0.5	1	-	-	Multipolar	aneuploid	biparental
Embryo 17.B7	B	Chr11					0			1	1	-	-	Multipolar	aneuploid	biparental
Embryo 17.B7	B	Chr12	25194	1	26028	0	1	1	0	1	0.5	-	-	Multipolar	aneuploid	biparental
Embryo 17.B7	B	Chr13	25194	1	26028	0	1	1	0	1	0.5	-	-	Multipolar	aneuploid	biparental
Embryo 17.B7	B	Chr14	25194	3	26028	0	3	1	0	1	0.125	-	-	Multipolar	aneuploid	biparental
Embryo 17.B7	B	Chr15	25194	14	26028	74	88	0.159091	0.840909	2.5446e-11	1	sig	-	Multipolar	aneuploid	biparental
Embryo 17.B7	B	Chr16	25194	0	26028	1	1	0	1	0.5	1	-	-	Multipolar	aneuploid	biparental
Embryo 17.B7	B	Chr17					0			1	1	-	-	Multipolar	aneuploid	biparental
Embryo 17.B7	B	Chr18					0			1	1	-	-	Multipolar	aneuploid	biparental
Embryo 17.B7	B	Chr19	25194	3	26028	22	25	0.12	0.88	7.82609e-05	0.99999	-	-	Multipolar	aneuploid	biparental
Embryo 17.B7	B	Chr20	25194	1	26028	1	2	0.5	0.5	0.75	0.75	-	-	Multipolar	aneuploid	biparental
Embryo 17.B7	B	ChrUn	25194	0	26028	1	1	0	1	0.5	1	-	-	Multipolar	aneuploid	biparental
Embryo 17.B7	B	ChrX					0			1	1	-	-	Multipolar	aneuploid	biparental
Embryo 17.B8	B	Chr1	25194	1	26028	0	1	1	0	1	0.5	-	-	Multipolar	aneuploid	biparental
Embryo 17.B8	B	Chr2	25194	1	26028	4	5	0.2	0.8	0.1875	0.96875	-	-	Multipolar	aneuploid	biparental
Embryo 17.B8	B	Chr3	25194	1	26028	3	4	0.25	0.75	0.3125	0.9375	-	-	Multipolar	aneuploid	biparental
Embryo 17.B8	B	Chr4	25194	2	26028	0	2	1	0	1	0.25	-	-	Multipolar	aneuploid	biparental
Embryo 17.B8	B	Chr5	25194	1	26028	0	1	1	0	1	0.5	-	-	Multipolar	aneuploid	biparental
Embryo 17.B8	B	Chr6	25194	1	26028	0	1	1	0	1	0.5	-	-	Multipolar	aneuploid	biparental
Embryo 17.B8	B	Chr7	25194	3	26028	0	3	1	0	1	0.125	-	-	Multipolar	aneuploid	biparental
Embryo 17.B8	B	Chr8					0			1	1	-	-	Multipolar	aneuploid	biparental
Embryo 17.B8	B	Chr9	25194	2	26028	0	2	1	0	1	0.25	-	-	Multipolar	aneuploid	biparental
Embryo 17.B8	B	Chr10	25194	1	26028	0	1	1	0	1	0.5	-	-	Multipolar	aneuploid	biparental
Embryo 17.B8	B	Chr11	25194	0	26028	1	1	0	1	0.5	1	-	-	Multipolar	aneuploid	biparental
Embryo 17.B8	B	Chr12					0			1	1	-	-	Multipolar	aneuploid	biparental
Embryo 17.B8	B	Chr13	25194	1	26028	2	3	0.333333	0.666667	0.5	0.875	-	-	Multipolar	aneuploid	biparental
Embryo 17.B8	B	Chr14	25194	3	26028	0	3	1	0	1	0.125	-	-	Multipolar	aneuploid	biparental
Embryo 17.B8	B	Chr15	25194	110	26028	610	720	0.152778	0.847222	4.31781e-85	1	sig	-	Multipolar	aneuploid	biparental
Embryo 17.B8	B	Chr16					0			1	1	-	-	Multipolar	aneuploid	biparental
Embryo 17.B8	B	Chr17	25194	2	26028	1	3	0.666667	0.333333	0.875	0.5	-	-	Multipolar	aneuploid	biparental
Embryo 17.B8	B	Chr18	25194	0	26028	2	2	0	1	0.25	1	-	-	Multipolar	aneuploid	biparental
Embryo 17.B8	B	Chr19	25194	55	26028	256	311	0.176849	0.823151	1.8835e-32	1	sig	-	Multipolar	aneuploid	biparental
Embryo 17.B8	B	Chr20					0			1	1	-	-	Multipolar	aneuploid	biparental
Embryo 17.B8	B	ChrUn	25194	1	26028	8	9	0.111111	0.888889	0.0195312	0.998047	-	-	Multipolar	aneuploid	biparental
Embryo 17.B8	B	ChrX	25194	1	26028	0	1	1	0	1	0.5	-	-	Multipolar	aneuploid	biparental
Embryo 17.B9B10	B	Chr1	25194	262	26028	208	470	0.557447	0.442553	0.994448	0.00720506	-	-	Multipolar	aneuploid	biparental
Embryo 17.B9B10	B	Chr2	25194	259	26028	195	454	0.570485	0.429515	0.998876	0.00153337	-	-	Multipolar	aneuploid	biparental
Embryo 17.B9B10	B	Chr3	25194	224	26028	196	420	0.533333	0.466667	0.921515	0.0938093	-	-	Multipolar	aneuploid	biparental
Embryo 17.B9B10	B	Chr4	25194	197	26028	290	487	0.404517	0.595483	1.45271e-05	0.99999	-	-	Multipolar	aneuploid	biparental
Embryo 17.B9B10	B	Chr5	25194	187	26028	162	349	0.535817	0.464183	0.918048	0.0994155	-	-	Multipolar	aneuploid	biparental
Embryo 17.B9B10	B	Chr6	25194	186	26028	157	343	0.542274	0.457726	0.947436	0.065225	-	-	Multipolar	aneuploid	biparental
Embryo 17.B9B10	B	Chr7	25194	202	26028	178	380	0.531579	0.468421	0.900193	0.119005	-	-	Multipolar	aneuploid	biparental
Embryo 17.B9B10	B	Chr8	25194	333	26028	169	502	0.663347	0.336653	1	1.06577e-13	-	sig	Multipolar	aneuploid	biparental
Embryo 17.B9B10	B	Chr9	25194	178	26028	132	310	0.574194	0.425806	0.996251	0.00523878	-	-	Multipolar	aneuploid	biparental
Embryo 17.B9B10	B	Chr10	25194	195	26028	131	326	0.59816	0.40184	0.999848	0.000233196	-	-	Multipolar	aneuploid	biparental
Embryo 17.B9B10	B	Chr11	25194	153	26028	130	283	0.540636	0.459364	0.923222	0.0954304	-	-	Multipolar	aneuploid	biparental
Embryo 17.B9B10	B	Chr12	25194	153	26028	129	282	0.542553	0.457447	0.931791	0.085346	-	-	Multipolar	aneuploid	biparental
Embryo 17.B9B10	B	Chr13	25194	114	26028	137	251	0.454183	0.545817	0.0824081	0.935179	-	-	Multipolar	aneuploid	biparental
Embryo 17.B9B10	B	Chr14	25194	198	26028	153	351	0.564103	0.435897	0.993019	0.00935957	-	-	Multipolar	aneuploid	biparental
Embryo 17.B9B10	B	Chr15	25194	0	26028	1	1	0	1	0.5	1	-	-	Multipolar	aneuploid	biparental
Embryo 17.B9B10	B	Chr16	25194	135	26028	187	322	0.419255	0.580745	0.0022041	0.998459	-	-	Multipolar	aneuploid	biparental
Embryo 17.B9B10	B	Chr17	25194	150	26028	113	263	0.570342	0.429658	0.990526	0.0131202	-	-	Multipolar	aneuploid	biparental
Embryo 17.B9B10	B	Chr18	25194	117	26028	84	201	0.58209	0.41791	0.991868	0.0118806	-	-	Multipolar	aneuploid	biparental
Embryo 17.B9B10	B	Chr19	25194	51	26028	22	73	0.69863	0.30137	0.999814	0.000457137	-	-	Multipolar	aneuploid	biparental
Embryo 17.B9B10	B	Chr20	25194	139	26028	106	245	0.567347	0.432653	0.985183	0.0203474	-	-	Multipolar	aneuploid	biparental
Embryo 17.B9B10	B	ChrUn	25194	37	26028	22	59	0.627119	0.372881	0.981828	0.0337223	-	-	Multipolar	aneuploid	biparental
Embryo 17.B9B10	B	ChrX	25194	83	26028	50	133	0.62406	0.37594	0.998475	0.00266287	-	-	Multipolar	aneuploid	biparental
Embryo 17.F2	CCF	Chr1	25194	0	26028	2	2	0	1	0.25	1	-	-	Multipolar	aneuploid	biparental
Embryo 17.F2	CCF	Chr1					0			1	1	-	-	Multipolar	aneuploid	biparental
Embryo 17.F2	CCF	Chr2	25194	5	26028	6	11	0.454545	0.545455	0.5	0.725586	-	-	Multipolar	aneuploid	biparental
Embryo 17.F2	CCF	Chr2					0			1	1	-	-	Multipolar	aneuploid	biparental
Embryo 17.F2	CCF	Chr3	25194	3	26028	1	4	0.75	0.25	0.9375	0.3125	-	-	Multipolar	aneuploid	biparental
Embryo 17.F2	CCF	Chr3					0			1	1	-	-	Multipolar	aneuploid	biparental
Embryo 17.F2	CCF	Chr4	25194	1	26028	2	3	0.333333	0.666667	0.5	0.875	-	-	Multipolar	aneuploid	biparental
Embryo 17.F2	CCF	Chr4					0			1	1	-	-	Multipolar	aneuploid	biparental
Embryo 17.F2	CCF	Chr5	25194	173	26028	32	205	0.843902	0.156098	1	6.65443e-25	-	sig	Multipolar	aneuploid	biparental
Embryo 17.F2	CCF	Chr5	25194	31	26028	3	34	0.911765	0.0882353	1	3.83006e-07	-	sig	Multipolar	aneuploid	biparental
Embryo 17.F2	CCF	Chr6	25194	0	26028	3	3	0	1	0.125	1	-	-	Multipolar	aneuploid	biparental
Embryo 17.F2	CCF	Chr6	25194	0	26028	1	1	0	1	0.5	1	-	-	Multipolar	aneuploid	biparental
Embryo 17.F2	CCF	Chr7	25194	4	26028	8	12	0.333333	0.666667	0.193848	0.927002	-	-	Multipolar	aneuploid	biparental
Embryo 17.F2	CCF	Chr7					0			1	1	-	-	Multipolar	aneuploid	biparental
Embryo 17.F2	CCF	Chr8	25194	1	26028	4	5	0.2	0.8	0.1875	0.96875	-	-	Multipolar	aneuploid	biparental
Embryo 17.F2	CCF	Chr8	25194	0	26028	2	2	0	1	0.25	1	-	-	Multipolar	aneuploid	biparental
Embryo 17.F2	CCF	Chr9	25194	2	26028	2	4	0.5	0.5	0.6875	0.6875	-	-	Multipolar	aneuploid	biparental
Embryo 17.F2	CCF	Chr9					0			1	1	-	-	Multipolar	aneuploid	biparental
Embryo 17.F2	CCF	Chr10	25194	0	26028	1	1	0	1	0.5	1	-	-	Multipolar	aneuploid	biparental
Embryo 17.F2	CCF	Chr10					0			1	1	-	-	Multipolar	aneuploid	biparental
Embryo 17.F2	CCF	Chr11	25194	0	26028	2	2	0	1	0.25	1	-	-	Multipolar	aneuploid	biparental
Embryo 17.F2	CCF	Chr11					0			1	1	-	-	Multipolar	aneuploid	biparental
Embryo 17.F2	CCF	Chr12	25194	2	26028	2	4	0.5	0.5	0.6875	0.6875	-	-	Multipolar	aneuploid	biparental
Embryo 17.F2	CCF	Chr12					0			1	1	-	-	Multipolar	aneuploid	biparental
Embryo 17.F2	CCF	Chr13	25194	3	26028	1	4	0.75	0.25	0.9375	0.3125	-	-	Multipolar	aneuploid	biparental
Embryo 17.F2	CCF	Chr13	25194	1	26028	0	1	1	0	1	0.5	-	-	Multipolar	aneuploid	biparental
Embryo 17.F2	CCF	Chr14	25194	1	26028	1	2	0.5	0.5	0.75	0.75	-	-	Multipolar	aneuploid	biparental
Embryo 17.F2	CCF	Chr14	25194	0	26028	1	1	0	1	0.5	1	-	-	Multipolar	aneuploid	biparental
Embryo 17.F2	CCF	Chr15	25194	3	26028	1	4	0.75	0.25	0.9375	0.3125	-	-	Multipolar	aneuploid	biparental
Embryo 17.F2	CCF	Chr15					0			1	1	-	-	Multipolar	aneuploid	biparental
Embryo 17.F2	CCF	Chr16	25194	2	26028	0	2	1	0	1	0.25	-	-	Multipolar	aneuploid	biparental
Embryo 17.F2	CCF	Chr16					0			1	1	-	-	Multipolar	aneuploid	biparental
Embryo 17.F2	CCF	Chr17	25194	0	26028	1	1	0	1	0.5	1	-	-	Multipolar	aneuploid	biparental
Embryo 17.F2	CCF	Chr17					0			1	1	-	-	Multipolar	aneuploid	biparental
Embryo 17.F2	CCF	Chr18	25194	0	26028	1	1	0	1	0.5	1	-	-	Multipolar	aneuploid	biparental
Embryo 17.F2	CCF	Chr18					0			1	1	-	-	Multipolar	aneuploid	biparental
Embryo 17.F2	CCF	Chr19					0			1	1	-	-	Multipolar	aneuploid	biparental
Embryo 17.F2	CCF	Chr19					0			1	1	-	-	Multipolar	aneuploid	biparental
Embryo 17.F2	CCF	Chr20	25194	1	26028	0	1	1	0	1	0.5	-	-	Multipolar	aneuploid	biparental
Embryo 17.F2	CCF	Chr20					0			1	1	-	-	Multipolar	aneuploid	biparental
Embryo 17.F2	CCF	ChrUn	25194	2	26028	0	2	1	0	1	0.25	-	-	Multipolar	aneuploid	biparental
Embryo 17.F2	CCF	ChrUn					0			1	1	-	-	Multipolar	aneuploid	biparental
Embryo 17.F2	CCF	ChrX					0			1	1	-	-	Multipolar	aneuploid	biparental
Embryo 17.F2	CCF	ChrX					0			1	1	-	-	Multipolar	aneuploid	biparental
Embryo 18.B1	B	Chr1	25194	476	26028	98	574	0.829268	0.170732	1	7.73103e-61	-	sig	Bipolar	chaotic aneuploid	biparental
Embryo 18.B1	B	Chr2	25194	7	26028	9	16	0.4375	0.5625	0.40181	0.772751	-	-	Bipolar	chaotic aneuploid	biparental
Embryo 18.B1	B	Chr3	25194	42	26028	166	208	0.201923	0.798077	6.16989e-19	1	sig	-	Bipolar	chaotic aneuploid	biparental
Embryo 18.B1	B	Chr4	25194	42	26028	172	214	0.196262	0.803738	3.59823e-20	1	sig	-	Bipolar	chaotic aneuploid	biparental
Embryo 18.B1	B	Chr5	25194	206	26028	40	246	0.837398	0.162602	1	2.03058e-28	-	sig	Bipolar	chaotic aneuploid	biparental
Embryo 18.B1	B	Chr6	25194	325	26028	222	547	0.59415	0.40585	0.999996	6.11825e-06	-	sig	Bipolar	chaotic aneuploid	biparental
Embryo 18.B1	B	Chr7	25194	53	26028	151	204	0.259804	0.740196	2.13236e-12	1	sig	-	Bipolar	chaotic aneuploid	biparental
Embryo 18.B1	B	Chr8	25194	23	26028	157	180	0.127778	0.872222	5.05253e-26	1	sig	-	Bipolar	chaotic aneuploid	biparental
Embryo 18.B1	B	Chr9	25194	183	26028	286	469	0.390192	0.609808	1.13393e-06	0.999999	sig	-	Bipolar	chaotic aneuploid	biparental
Embryo 18.B1	B	Chr10	25194	138	26028	142	280	0.492857	0.507143	0.428878	0.617425	-	-	Bipolar	chaotic aneuploid	biparental
Embryo 18.B1	B	Chr11	25194	37	26028	132	169	0.218935	0.781065	5.11033e-14	1	sig	-	Bipolar	chaotic aneuploid	biparental
Embryo 18.B1	B	Chr12	25194	117	26028	145	262	0.446565	0.553435	0.0475574	0.963505	-	-	Bipolar	chaotic aneuploid	biparental
Embryo 18.B1	B	Chr13	25194	150	26028	116	266	0.56391	0.43609	0.98416	0.0214168	-	-	Bipolar	chaotic aneuploid	biparental
Embryo 18.B1	B	Chr14	25194	271	26028	65	336	0.806548	0.193452	1	2.44472e-31	-	sig	Bipolar	chaotic aneuploid	biparental
Embryo 18.B1	B	Chr15	25194	123	26028	217	340	0.361765	0.638235	1.94062e-07	1	sig	-	Bipolar	chaotic aneuploid	biparental
Embryo 18.B1	B	Chr16	25194	14	26028	59	73	0.191781	0.808219	5.06822e-08	1	sig	-	Bipolar	chaotic aneuploid	biparental
Embryo 18.B1	B	Chr17	25194	97	26028	23	120	0.808333	0.191667	1	2.6318e-12	-	sig	Bipolar	chaotic aneuploid	biparental
Embryo 18.B1	B	Chr18	25194	16	26028	90	106	0.150943	0.849057	5.4974e-14	1	sig	-	Bipolar	chaotic aneuploid	biparental
Embryo 18.B1	B	Chr19	25194	2	26028	2	4	0.5	0.5	0.6875	0.6875	-	-	Bipolar	chaotic aneuploid	biparental
Embryo 18.B1	B	Chr20	25194	0	26028	1	1	0	1	0.5	1	-	-	Bipolar	chaotic aneuploid	biparental
Embryo 18.B1	B	ChrUn	25194	15	26028	14	29	0.517241	0.482759	0.644464	0.5	-	-	Bipolar	chaotic aneuploid	biparental
Embryo 18.B1	B	ChrX	25194	133	26028	29	162	0.820988	0.179012	1	2.03512e-17	-	sig	Bipolar	chaotic aneuploid	biparental
Embryo 18.B2	B	Chr1	25194	4	26028	2	6	0.666667	0.333333	0.890625	0.34375	-	-	Bipolar	chaotic aneuploid	biparental
Embryo 18.B2	B	Chr2	25194	2	26028	0	2	1	0	1	0.25	-	-	Bipolar	chaotic aneuploid	biparental
Embryo 18.B2	B	Chr3	25194	3	26028	0	3	1	0	1	0.125	-	-	Bipolar	chaotic aneuploid	biparental
Embryo 18.B2	B	Chr4	25194	294	26028	56	350	0.84	0.16	1	2.11646e-40	-	sig	Bipolar	chaotic aneuploid	biparental
Embryo 18.B2	B	Chr5	25194	1	26028	0	1	1	0	1	0.5	-	-	Bipolar	chaotic aneuploid	biparental
Embryo 18.B2	B	Chr6	25194	86	26028	404	490	0.17551	0.82449	1.33291e-50	1	sig	-	Bipolar	chaotic aneuploid	biparental
Embryo 18.B2	B	Chr7	25194	6	26028	3	9	0.666667	0.333333	0.910156	0.253906	-	-	Bipolar	chaotic aneuploid	biparental
Embryo 18.B2	B	Chr8	25194	220	26028	36	256	0.859375	0.140625	1	1.04043e-33	-	sig	Bipolar	chaotic aneuploid	biparental
Embryo 18.B2	B	Chr9	25194	0	26028	1	1	0	1	0.5	1	-	-	Bipolar	chaotic aneuploid	biparental
Embryo 18.B2	B	Chr10	25194	5	26028	0	5	1	0	1	0.03125	-	-	Bipolar	chaotic aneuploid	biparental
Embryo 18.B2	B	Chr11	25194	3	26028	0	3	1	0	1	0.125	-	-	Bipolar	chaotic aneuploid	biparental
Embryo 18.B2	B	Chr12	25194	2	26028	0	2	1	0	1	0.25	-	-	Bipolar	chaotic aneuploid	biparental
Embryo 18.B2	B	Chr13	25194	6	26028	0	6	1	0	1	0.015625	-	-	Bipolar	chaotic aneuploid	biparental
Embryo 18.B2	B	Chr14	25194	5	26028	0	5	1	0	1	0.03125	-	-	Bipolar	chaotic aneuploid	biparental
Embryo 18.B2	B	Chr15	25194	1	26028	1	2	0.5	0.5	0.75	0.75	-	-	Bipolar	chaotic aneuploid	biparental
Embryo 18.B2	B	Chr16	25194	2	26028	3	5	0.4	0.6	0.5	0.8125	-	-	Bipolar	chaotic aneuploid	biparental
Embryo 18.B2	B	Chr17	25194	29	26028	153	182	0.159341	0.840659	7.48173e-22	1	sig	-	Bipolar	chaotic aneuploid	biparental
Embryo 18.B2	B	Chr18					0			1	1	-	-	Bipolar	chaotic aneuploid	biparental
Embryo 18.B2	B	Chr19	25194	3	26028	1	4	0.75	0.25	0.9375	0.3125	-	-	Bipolar	chaotic aneuploid	biparental
Embryo 18.B2	B	Chr20	25194	0	26028	1	1	0	1	0.5	1	-	-	Bipolar	chaotic aneuploid	biparental
Embryo 18.B2	B	ChrUn	25194	0	26028	6	6	0	1	0.015625	1	-	-	Bipolar	chaotic aneuploid	biparental
Embryo 18.B2	B	ChrX	25194	7	26028	0	7	1	0	1	0.0078125	-	-	Bipolar	chaotic aneuploid	biparental
Embryo 18.B3	B	Chr1	25194	62	26028	314	376	0.164894	0.835106	5.71601e-42	1	sig	-	Bipolar	chaotic aneuploid	biparental
Embryo 18.B3	B	Chr2	25194	311	26028	336	647	0.48068	0.51932	0.172707	0.84665	-	-	Bipolar	chaotic aneuploid	biparental
Embryo 18.B3	B	Chr3	25194	271	26028	185	456	0.594298	0.405702	0.999978	3.28386e-05	-	-	Bipolar	chaotic aneuploid	biparental
Embryo 18.B3	B	Chr4	25194	286	26028	159	445	0.642697	0.357303	1	9.10998e-10	-	sig	Bipolar	chaotic aneuploid	biparental
Embryo 18.B3	B	Chr5	25194	178	26028	240	418	0.425837	0.574163	0.00140247	0.998988	-	-	Bipolar	chaotic aneuploid	biparental
Embryo 18.B3	B	Chr6	25194	31	26028	110	141	0.219858	0.780142	7.19213e-12	1	sig	-	Bipolar	chaotic aneuploid	biparental
Embryo 18.B3	B	Chr7	25194	283	26028	147	430	0.65814	0.34186	1	2.61132e-11	-	sig	Bipolar	chaotic aneuploid	biparental
Embryo 18.B3	B	Chr8	25194	246	26028	122	368	0.668478	0.331522	1	4.81817e-11	-	sig	Bipolar	chaotic aneuploid	biparental
Embryo 18.B3	B	Chr9	25194	88	26028	25	113	0.778761	0.221239	1	1.03099e-09	-	sig	Bipolar	chaotic aneuploid	biparental
Embryo 18.B3	B	Chr10	25194	104	26028	95	199	0.522613	0.477387	0.760754	0.285377	-	-	Bipolar	chaotic aneuploid	biparental
Embryo 18.B3	B	Chr11	25194	190	26028	114	304	0.625	0.375	0.999995	7.70823e-06	-	sig	Bipolar	chaotic aneuploid	biparental
Embryo 18.B3	B	Chr12	25194	103	26028	111	214	0.481308	0.518692	0.316195	0.730748	-	-	Bipolar	chaotic aneuploid	biparental
Embryo 18.B3	B	Chr13	25194	120	26028	99	219	0.547945	0.452055	0.931533	0.0882039	-	-	Bipolar	chaotic aneuploid	biparental
Embryo 18.B3	B	Chr14	25194	37	26028	205	242	0.152893	0.847107	1.092e-29	1	sig	-	Bipolar	chaotic aneuploid	biparental
Embryo 18.B3	B	Chr15	25194	65	26028	17	82	0.792683	0.207317	1	4.47694e-08	-	sig	Bipolar	chaotic aneuploid	biparental
Embryo 18.B3	B	Chr16	25194	93	26028	67	160	0.58125	0.41875	0.983763	0.0238835	-	-	Bipolar	chaotic aneuploid	biparental
Embryo 18.B3	B	Chr17	25194	92	26028	151	243	0.378601	0.621399	9.29533e-05	0.999945	-	-	Bipolar	chaotic aneuploid	biparental
Embryo 18.B3	B	Chr18	25194	137	26028	84	221	0.61991	0.38009	0.999869	0.000221522	-	-	Bipolar	chaotic aneuploid	biparental
Embryo 18.B3	B	Chr19	25194	78	26028	73	151	0.516556	0.483444	0.687248	0.372457	-	-	Bipolar	chaotic aneuploid	biparental
Embryo 18.B3	B	Chr20	25194	129	26028	124	253	0.509881	0.490119	0.646954	0.400753	-	-	Bipolar	chaotic aneuploid	biparental
Embryo 18.B3	B	ChrUn	25194	29	26028	19	48	0.604167	0.395833	0.944299	0.0967063	-	-	Bipolar	chaotic aneuploid	biparental
Embryo 18.B3	B	ChrX	25194	26	26028	8	34	0.764706	0.235294	0.999589	0.00146753	-	-	Bipolar	chaotic aneuploid	biparental
Embryo 18.B4	B	Chr1	25194	254	26028	286	540	0.47037	0.52963	0.0910712	0.922242	-	-	Bipolar	chaotic aneuploid	biparental
Embryo 18.B4	B	Chr2	25194	145	26028	187	332	0.436747	0.563253	0.0121462	0.990928	-	-	Bipolar	chaotic aneuploid	biparental
Embryo 18.B4	B	Chr3	25194	180	26028	45	225	0.8	0.2	1	1.28968e-20	-	sig	Bipolar	chaotic aneuploid	biparental
Embryo 18.B4	B	Chr4	25194	42	26028	120	162	0.259259	0.740741	3.39896e-10	1	sig	-	Bipolar	chaotic aneuploid	biparental
Embryo 18.B4	B	Chr5	25194	202	26028	229	431	0.468677	0.531323	0.105191	0.91132	-	-	Bipolar	chaotic aneuploid	biparental
Embryo 18.B4	B	Chr6	25194	3	26028	2	5	0.6	0.4	0.8125	0.5	-	-	Bipolar	chaotic aneuploid	biparental
Embryo 18.B4	B	Chr7	25194	211	26028	169	380	0.555263	0.444737	0.986368	0.0176526	-	-	Bipolar	chaotic aneuploid	biparental
Embryo 18.B4	B	Chr8	25194	59	26028	185	244	0.241803	0.758197	1.2688e-16	1	sig	-	Bipolar	chaotic aneuploid	biparental
Embryo 18.B4	B	Chr9	25194	148	26028	128	276	0.536232	0.463768	0.896935	0.126359	-	-	Bipolar	chaotic aneuploid	biparental
Embryo 18.B4	B	Chr10	25194	144	26028	130	274	0.525547	0.474453	0.817567	0.216149	-	-	Bipolar	chaotic aneuploid	biparental
Embryo 18.B4	B	Chr11	25194	26	26028	115	141	0.184397	0.815603	7.41191e-15	1	sig	-	Bipolar	chaotic aneuploid	biparental
Embryo 18.B4	B	Chr12	25194	206	26028	150	356	0.578652	0.421348	0.998764	0.0017493	-	-	Bipolar	chaotic aneuploid	biparental
Embryo 18.B4	B	Chr13	25194	125	26028	110	235	0.531915	0.468085	0.851701	0.180568	-	-	Bipolar	chaotic aneuploid	biparental
Embryo 18.B4	B	Chr14	25194	166	26028	365	531	0.312618	0.687382	1.71931e-18	1	sig	-	Bipolar	chaotic aneuploid	biparental
Embryo 18.B4	B	Chr15	25194	109	26028	92	201	0.542289	0.457711	0.897947	0.129517	-	-	Bipolar	chaotic aneuploid	biparental
Embryo 18.B4	B	Chr16	25194	199	26028	69	268	0.742537	0.257463	1	4.3531e-16	-	sig	Bipolar	chaotic aneuploid	biparental
Embryo 18.B4	B	Chr17	25194	267	26028	63	330	0.809091	0.190909	1	2.48299e-31	-	sig	Bipolar	chaotic aneuploid	biparental
Embryo 18.B4	B	Chr18	25194	0	26028	3	3	0	1	0.125	1	-	-	Bipolar	chaotic aneuploid	biparental
Embryo 18.B4	B	Chr19	25194	56	26028	59	115	0.486957	0.513043	0.426078	0.645339	-	-	Bipolar	chaotic aneuploid	biparental
Embryo 18.B4	B	Chr20	25194	99	26028	79	178	0.55618	0.44382	0.942384	0.0771084	-	-	Bipolar	chaotic aneuploid	biparental
Embryo 18.B4	B	ChrUn	25194	32	26028	22	54	0.592593	0.407407	0.933163	0.110164	-	-	Bipolar	chaotic aneuploid	biparental
Embryo 18.B4	B	ChrX	25194	181	26028	41	222	0.815315	0.184685	1	1.75981e-22	-	sig	Bipolar	chaotic aneuploid	biparental
Embryo 18.B5	B	Chr1	25194	213	26028	217	430	0.495349	0.504651	0.442495	0.595252	-	-	Bipolar	chaotic aneuploid	biparental
Embryo 18.B5	B	Chr2	25194	210	26028	192	402	0.522388	0.477612	0.828337	0.198266	-	-	Bipolar	chaotic aneuploid	biparental
Embryo 18.B5	B	Chr3	25194	230	26028	330	560	0.410714	0.589286	1.37097e-05	0.999991	-	-	Bipolar	chaotic aneuploid	biparental
Embryo 18.B5	B	Chr4	25194	169	26028	80	249	0.678715	0.321285	1	8.7194e-09	-	sig	Bipolar	chaotic aneuploid	biparental
Embryo 18.B5	B	Chr5	25194	191	26028	171	362	0.527624	0.472376	0.865158	0.15899	-	-	Bipolar	chaotic aneuploid	biparental
Embryo 18.B5	B	Chr6	25194	272	26028	134	406	0.669951	0.330049	1	3.32295e-12	-	sig	Bipolar	chaotic aneuploid	biparental
Embryo 18.B5	B	Chr7	25194	199	26028	118	317	0.62776	0.37224	0.999998	3.14421e-06	-	sig	Bipolar	chaotic aneuploid	biparental
Embryo 18.B5	B	Chr8	25194	172	26028	136	308	0.558442	0.441558	0.982581	0.0229712	-	-	Bipolar	chaotic aneuploid	biparental
Embryo 18.B5	B	Chr9	25194	142	26028	132	274	0.518248	0.481752	0.746789	0.293361	-	-	Bipolar	chaotic aneuploid	biparental
Embryo 18.B5	B	Chr10	25194	109	26028	99	208	0.524038	0.475962	0.777144	0.266352	-	-	Bipolar	chaotic aneuploid	biparental
Embryo 18.B5	B	Chr11	25194	214	26028	148	362	0.59116	0.40884	0.999793	0.000307609	-	-	Bipolar	chaotic aneuploid	biparental
Embryo 18.B5	B	Chr12	25194	124	26028	110	234	0.529915	0.470085	0.836596	0.197732	-	-	Bipolar	chaotic aneuploid	biparental
Embryo 18.B5	B	Chr13	25194	127	26028	101	228	0.557018	0.442982	0.963238	0.048788	-	-	Bipolar	chaotic aneuploid	biparental
Embryo 18.B5	B	Chr14	25194	136	26028	19	155	0.877419	0.122581	1	2.73106e-23	-	sig	Bipolar	chaotic aneuploid	biparental
Embryo 18.B5	B	Chr15	25194	62	26028	113	175	0.354286	0.645714	7.11056e-05	0.999962	-	-	Bipolar	chaotic aneuploid	biparental
Embryo 18.B5	B	Chr16	25194	24	26028	35	59	0.40678	0.59322	0.0962632	0.941261	-	-	Bipolar	chaotic aneuploid	biparental
Embryo 18.B5	B	Chr17	25194	23	26028	92	115	0.2	0.8	2.89354e-11	1	sig	-	Bipolar	chaotic aneuploid	biparental
Embryo 18.B5	B	Chr18	25194	145	26028	156	301	0.481728	0.518272	0.282212	0.755396	-	-	Bipolar	chaotic aneuploid	biparental
Embryo 18.B5	B	Chr19	25194	45	26028	41	86	0.523256	0.476744	0.704982	0.373267	-	-	Bipolar	chaotic aneuploid	biparental
Embryo 18.B5	B	Chr20	25194	82	26028	82	164	0.5	0.5	0.531105	0.531105	-	-	Bipolar	chaotic aneuploid	biparental
Embryo 18.B5	B	ChrUn	25194	7	26028	18	25	0.28	0.72	0.0216426	0.992683	-	-	Bipolar	chaotic aneuploid	biparental
Embryo 18.B5	B	ChrX	25194	4	26028	2	6	0.666667	0.333333	0.890625	0.34375	-	-	Bipolar	chaotic aneuploid	biparental
Embryo 18.B7	B	Chr1	25194	135	26028	136	271	0.498155	0.501845	0.5	0.548334	-	-	Bipolar	chaotic aneuploid	biparental
Embryo 18.B7	B	Chr2	25194	179	26028	304	483	0.3706	0.6294	7.01793e-09	1	sig	-	Bipolar	chaotic aneuploid	biparental
Embryo 18.B7	B	Chr3	25194	159	26028	260	419	0.379475	0.620525	4.6003e-07	1	sig	-	Bipolar	chaotic aneuploid	biparental
Embryo 18.B7	B	Chr4	25194	197	26028	107	304	0.648026	0.351974	1	1.36862e-07	-	sig	Bipolar	chaotic aneuploid	biparental
Embryo 18.B7	B	Chr5	25194	156	26028	188	344	0.453488	0.546512	0.0472488	0.962476	-	-	Bipolar	chaotic aneuploid	biparental
Embryo 18.B7	B	Chr6	25194	185	26028	128	313	0.591054	0.408946	0.999494	0.000754373	-	-	Bipolar	chaotic aneuploid	biparental
Embryo 18.B7	B	Chr7	25194	244	26028	141	385	0.633766	0.366234	1	8.54672e-08	-	sig	Bipolar	chaotic aneuploid	biparental
Embryo 18.B7	B	Chr8	25194	143	26028	277	420	0.340476	0.659524	2.98078e-11	1	sig	-	Bipolar	chaotic aneuploid	biparental
Embryo 18.B7	B	Chr9	25194	138	26028	118	256	0.539062	0.460938	0.905376	0.117484	-	-	Bipolar	chaotic aneuploid	biparental
Embryo 18.B7	B	Chr10	25194	157	26028	157	314	0.5	0.5	0.522496	0.522496	-	-	Bipolar	chaotic aneuploid	biparental
Embryo 18.B7	B	Chr11	25194	104	26028	111	215	0.483721	0.516279	0.341247	0.707276	-	-	Bipolar	chaotic aneuploid	biparental
Embryo 18.B7	B	Chr12	25194	210	26028	125	335	0.626866	0.373134	0.999999	1.9859e-06	-	sig	Bipolar	chaotic aneuploid	biparental
Embryo 18.B7	B	Chr13	25194	74	26028	67	141	0.524823	0.475177	0.749685	0.306756	-	-	Bipolar	chaotic aneuploid	biparental
Embryo 18.B7	B	Chr14	25194	99	26028	121	220	0.45	0.55	0.0783355	0.939607	-	-	Bipolar	chaotic aneuploid	biparental
Embryo 18.B7	B	Chr15	25194	132	26028	88	220	0.6	0.4	0.998831	0.0018228	-	-	Bipolar	chaotic aneuploid	biparental
Embryo 18.B7	B	Chr16	25194	113	26028	72	185	0.610811	0.389189	0.999032	0.0015829	-	-	Bipolar	chaotic aneuploid	biparental
Embryo 18.B7	B	Chr17	25194	149	26028	77	226	0.659292	0.340708	1	9.61531e-07	-	sig	Bipolar	chaotic aneuploid	biparental
Embryo 18.B7	B	Chr18	25194	76	26028	84	160	0.475	0.525	0.290065	0.761559	-	-	Bipolar	chaotic aneuploid	biparental
Embryo 18.B7	B	Chr19	25194	21	26028	26	47	0.446809	0.553191	0.280032	0.809153	-	-	Bipolar	chaotic aneuploid	biparental
Embryo 18.B7	B	Chr20	25194	138	26028	111	249	0.554217	0.445783	0.962109	0.0496117	-	-	Bipolar	chaotic aneuploid	biparental
Embryo 18.B7	B	ChrUn	25194	21	26028	29	50	0.42	0.58	0.161118	0.898681	-	-	Bipolar	chaotic aneuploid	biparental
Embryo 18.B7	B	ChrX	25194	96	26028	24	120	0.8	0.2	1	1.08111e-11	-	sig	Bipolar	chaotic aneuploid	biparental
Embryo 18.B8	B	Chr1	25194	7	26028	1	8	0.875	0.125	0.996094	0.0351563	-	-	Bipolar	chaotic aneuploid	biparental
Embryo 18.B8	B	Chr2	25194	406	26028	101	507	0.800789	0.199211	1	1.22662e-44	-	sig	Bipolar	chaotic aneuploid	biparental
Embryo 18.B8	B	Chr3	25194	437	26028	87	524	0.833969	0.166031	1	2.12453e-57	-	sig	Bipolar	chaotic aneuploid	biparental
Embryo 18.B8	B	Chr4	25194	146	26028	572	718	0.203343	0.796657	1.0639e-60	1	sig	-	Bipolar	chaotic aneuploid	biparental
Embryo 18.B8	B	Chr5	25194	93	26028	373	466	0.199571	0.800429	4.56758e-41	1	sig	-	Bipolar	chaotic aneuploid	biparental
Embryo 18.B8	B	Chr6	25194	1	26028	1	2	0.5	0.5	0.75	0.75	-	-	Bipolar	chaotic aneuploid	biparental
Embryo 18.B8	B	Chr7	25194	97	26028	383	480	0.202083	0.797917	1.58994e-41	1	sig	-	Bipolar	chaotic aneuploid	biparental
Embryo 18.B8	B	Chr8	25194	7	26028	1	8	0.875	0.125	0.996094	0.0351563	-	-	Bipolar	chaotic aneuploid	biparental
Embryo 18.B8	B	Chr9	25194	275	26028	349	624	0.440705	0.559295	0.00172064	0.998675	-	-	Bipolar	chaotic aneuploid	biparental
Embryo 18.B8	B	Chr10	25194	13	26028	3	16	0.8125	0.1875	0.99791	0.0106354	-	-	Bipolar	chaotic aneuploid	biparental
Embryo 18.B8	B	Chr11	25194	270	26028	72	342	0.789474	0.210526	1	2.21156e-28	-	sig	Bipolar	chaotic aneuploid	biparental
Embryo 18.B8	B	Chr12	25194	63	26028	273	336	0.1875	0.8125	1.35369e-32	1	sig	-	Bipolar	chaotic aneuploid	biparental
Embryo 18.B8	B	Chr13	25194	205	26028	35	240	0.854167	0.145833	1	9.86048e-31	-	sig	Bipolar	chaotic aneuploid	biparental
Embryo 18.B8	B	Chr14	25194	317	26028	348	665	0.476692	0.523308	0.122333	0.892695	-	-	Bipolar	chaotic aneuploid	biparental
Embryo 18.B8	B	Chr15	25194	46	26028	241	287	0.160279	0.839721	2.29686e-33	1	sig	-	Bipolar	chaotic aneuploid	biparental
Embryo 18.B8	B	Chr16	25194	44	26028	179	223	0.197309	0.802691	8.24561e-21	1	sig	-	Bipolar	chaotic aneuploid	biparental
Embryo 18.B8	B	Chr17	25194	223	26028	58	281	0.793594	0.206406	1	2.77971e-24	-	sig	Bipolar	chaotic aneuploid	biparental
Embryo 18.B8	B	Chr18	25194	131	26028	39	170	0.770588	0.229412	1	3.96112e-13	-	sig	Bipolar	chaotic aneuploid	biparental
Embryo 18.B8	B	Chr19	25194	176	26028	104	280	0.628571	0.371429	0.999994	9.9929e-06	-	-	Bipolar	chaotic aneuploid	biparental
Embryo 18.B8	B	Chr20	25194	3	26028	0	3	1	0	1	0.125	-	-	Bipolar	chaotic aneuploid	biparental
Embryo 18.B8	B	ChrUn	25194	22	26028	17	39	0.564103	0.435897	0.831608	0.261199	-	-	Bipolar	chaotic aneuploid	biparental
Embryo 18.B8	B	ChrX	25194	2	26028	4	6	0.333333	0.666667	0.34375	0.890625	-	-	Bipolar	chaotic aneuploid	biparental
Embryo 18.PB1	PB	Chr1	25194	169	26028	28	197	0.857868	0.142132	1	4.57546e-26	-	sig	Bipolar	chaotic aneuploid	biparental
Embryo 18.PB1	PB	Chr2	25194	141	26028	32	173	0.815029	0.184971	1	7.94704e-18	-	sig	Bipolar	chaotic aneuploid	biparental
Embryo 18.PB1	PB	Chr3	25194	122	26028	28	150	0.813333	0.186667	1	1.7152e-15	-	sig	Bipolar	chaotic aneuploid	biparental
Embryo 18.PB1	PB	Chr4	25194	129	26028	38	167	0.772455	0.227545	1	4.34134e-13	-	sig	Bipolar	chaotic aneuploid	biparental
Embryo 18.PB1	PB	Chr5	25194	120	26028	32	152	0.789474	0.210526	1	1.76554e-13	-	sig	Bipolar	chaotic aneuploid	biparental
Embryo 18.PB1	PB	Chr6	25194	102	26028	25	127	0.80315	0.19685	1	1.56033e-12	-	sig	Bipolar	chaotic aneuploid	biparental
Embryo 18.PB1	PB	Chr7	25194	116	26028	34	150	0.773333	0.226667	1	5.59926e-12	-	sig	Bipolar	chaotic aneuploid	biparental
Embryo 18.PB1	PB	Chr8	25194	120	26028	22	142	0.84507	0.15493	1	7.83866e-18	-	sig	Bipolar	chaotic aneuploid	biparental
Embryo 18.PB1	PB	Chr9	25194	132	26028	31	163	0.809816	0.190184	1	2.42247e-16	-	sig	Bipolar	chaotic aneuploid	biparental
Embryo 18.PB1	PB	Chr10	25194	87	26028	16	103	0.84466	0.15534	1	2.69702e-13	-	sig	Bipolar	chaotic aneuploid	biparental
Embryo 18.PB1	PB	Chr11	25194	98	26028	21	119	0.823529	0.176471	1	2.20166e-13	-	sig	Bipolar	chaotic aneuploid	biparental
Embryo 18.PB1	PB	Chr12	25194	96	26028	20	116	0.827586	0.172414	1	2.12437e-13	-	sig	Bipolar	chaotic aneuploid	biparental
Embryo 18.PB1	PB	Chr13	25194	81	26028	22	103	0.786408	0.213592	1	2.03346e-09	-	sig	Bipolar	chaotic aneuploid	biparental
Embryo 18.PB1	PB	Chr14	25194	97	26028	14	111	0.873874	0.126126	1	9.42682e-17	-	sig	Bipolar	chaotic aneuploid	biparental
Embryo 18.PB1	PB	Chr15	25194	64	26028	15	79	0.810127	0.189873	1	1.15172e-08	-	sig	Bipolar	chaotic aneuploid	biparental
Embryo 18.PB1	PB	Chr16	25194	71	26028	15	86	0.825581	0.174419	1	3.53803e-10	-	sig	Bipolar	chaotic aneuploid	biparental
Embryo 18.PB1	PB	Chr17	25194	86	26028	15	101	0.851485	0.148515	1	1.41347e-13	-	sig	Bipolar	chaotic aneuploid	biparental
Embryo 18.PB1	PB	Chr18	25194	62	26028	18	80	0.775	0.225	1	4.07133e-07	-	sig	Bipolar	chaotic aneuploid	biparental
Embryo 18.PB1	PB	Chr19	25194	29	26028	9	38	0.763158	0.236842	0.999764	0.000829026	-	-	Bipolar	chaotic aneuploid	biparental
Embryo 18.PB1	PB	Chr20	25194	73	26028	10	83	0.879518	0.120482	1	2.90033e-13	-	sig	Bipolar	chaotic aneuploid	biparental
Embryo 18.PB1	PB	ChrUn	25194	32	26028	5	37	0.864865	0.135135	0.999999	3.71377e-06	-	sig	Bipolar	chaotic aneuploid	biparental
Embryo 18.PB1	PB	ChrX	25194	53	26028	13	66	0.80303	0.19697	1	3.61859e-07	-	sig	Bipolar	chaotic aneuploid	biparental
Embryo 18.PB2	PB	Chr1	25194	28	26028	14	42	0.666667	0.333333	0.99024	0.0217793	-	-	Bipolar	chaotic aneuploid	biparental
Embryo 18.PB2	PB	Chr2	25194	29	26028	11	40	0.725	0.275	0.998889	0.00321329	-	-	Bipolar	chaotic aneuploid	biparental
Embryo 18.PB2	PB	Chr3	25194	32	26028	17	49	0.653061	0.346939	0.989353	0.0221921	-	-	Bipolar	chaotic aneuploid	biparental
Embryo 18.PB2	PB	Chr4	25194	31	26028	12	43	0.72093	0.27907	0.999043	0.00270079	-	-	Bipolar	chaotic aneuploid	biparental
Embryo 18.PB2	PB	Chr5	25194	30	26028	12	42	0.714286	0.285714	0.998556	0.00395795	-	-	Bipolar	chaotic aneuploid	biparental
Embryo 18.PB2	PB	Chr6	25194	26	26028	13	39	0.666667	0.333333	0.988149	0.026626	-	-	Bipolar	chaotic aneuploid	biparental
Embryo 18.PB2	PB	Chr7	25194	23	26028	11	34	0.676471	0.323529	0.987847	0.0288063	-	-	Bipolar	chaotic aneuploid	biparental
Embryo 18.PB2	PB	Chr8	25194	23	26028	8	31	0.741935	0.258065	0.998337	0.00533692	-	-	Bipolar	chaotic aneuploid	biparental
Embryo 18.PB2	PB	Chr9	25194	11	26028	5	16	0.6875	0.3125	0.961594	0.105057	-	-	Bipolar	chaotic aneuploid	biparental
Embryo 18.PB2	PB	Chr10	25194	14	26028	4	18	0.777778	0.222222	0.996231	0.0154419	-	-	Bipolar	chaotic aneuploid	biparental
Embryo 18.PB2	PB	Chr11	25194	14	26028	9	23	0.608696	0.391304	0.89498	0.202436	-	-	Bipolar	chaotic aneuploid	biparental
Embryo 18.PB2	PB	Chr12	25194	10	26028	12	22	0.454545	0.545455	0.415906	0.738266	-	-	Bipolar	chaotic aneuploid	biparental
Embryo 18.PB2	PB	Chr13	25194	14	26028	13	27	0.518519	0.481481	0.649446	0.5	-	-	Bipolar	chaotic aneuploid	biparental
Embryo 18.PB2	PB	Chr14	25194	16	26028	5	21	0.761905	0.238095	0.996401	0.0133018	-	-	Bipolar	chaotic aneuploid	biparental
Embryo 18.PB2	PB	Chr15	25194	9	26028	10	19	0.473684	0.526316	0.5	0.676197	-	-	Bipolar	chaotic aneuploid	biparental
Embryo 18.PB2	PB	Chr16	25194	13	26028	7	20	0.65	0.35	0.942341	0.131588	-	-	Bipolar	chaotic aneuploid	biparental
Embryo 18.PB2	PB	Chr17	25194	14	26028	7	21	0.666667	0.333333	0.960823	0.0946236	-	-	Bipolar	chaotic aneuploid	biparental
Embryo 18.PB2	PB	Chr18	25194	8	26028	3	11	0.727273	0.272727	0.967285	0.113281	-	-	Bipolar	chaotic aneuploid	biparental
Embryo 18.PB2	PB	Chr19	25194	7	26028	3	10	0.7	0.3	0.945312	0.171875	-	-	Bipolar	chaotic aneuploid	biparental
Embryo 18.PB2	PB	Chr20	25194	11	26028	3	14	0.785714	0.214286	0.99353	0.0286865	-	-	Bipolar	chaotic aneuploid	biparental
Embryo 18.PB2	PB	ChrUn	25194	2	26028	0	2	1	0	1	0.25	-	-	Bipolar	chaotic aneuploid	biparental
Embryo 18.PB2	PB	ChrX	25194	6	26028	2	8	0.75	0.25	0.964844	0.144531	-	-	Bipolar	chaotic aneuploid	biparental
Embryo 19.B1	B	Chr1	25194	179	26028	41	220	0.813636	0.186364	1	4.68926e-22	-	sig	Bipolar	chaotic aneuploid	biparental
Embryo 19.B1	B	Chr2	25194	163	26028	160	323	0.504644	0.495356	0.588042	0.455707	-	-	Bipolar	chaotic aneuploid	biparental
Embryo 19.B1	B	Chr3	25194	172	26028	163	335	0.513433	0.486567	0.707557	0.331056	-	-	Bipolar	chaotic aneuploid	biparental
Embryo 19.B1	B	Chr4	25194	133	26028	163	296	0.449324	0.550676	0.0458531	0.964304	-	-	Bipolar	chaotic aneuploid	biparental
Embryo 19.B1	B	Chr5	25194	139	26028	229	368	0.377717	0.622283	1.56973e-06	0.999999	sig	-	Bipolar	chaotic aneuploid	biparental
Embryo 19.B1	B	Chr6	25194	100	26028	152	252	0.396825	0.603175	0.000634834	0.999596	-	-	Bipolar	chaotic aneuploid	biparental
Embryo 19.B1	B	Chr7	25194	35	26028	128	163	0.214724	0.785276	5.87604e-14	1	sig	-	Bipolar	chaotic aneuploid	biparental
Embryo 19.B1	B	Chr8	25194	142	26028	121	263	0.539924	0.460076	0.9126	0.108703	-	-	Bipolar	chaotic aneuploid	biparental
Embryo 19.B1	B	Chr9	25194	85	26028	121	206	0.412621	0.587379	0.00727292	0.995115	-	-	Bipolar	chaotic aneuploid	biparental
Embryo 19.B1	B	Chr10	25194	158	26028	104	262	0.603053	0.396947	0.999675	0.000510588	-	-	Bipolar	chaotic aneuploid	biparental
Embryo 19.B1	B	Chr11	25194	74	26028	103	177	0.418079	0.581921	0.0175141	0.988068	-	-	Bipolar	chaotic aneuploid	biparental
Embryo 19.B1	B	Chr12	25194	122	26028	125	247	0.493927	0.506073	0.449385	0.60042	-	-	Bipolar	chaotic aneuploid	biparental
Embryo 19.B1	B	Chr13	25194	119	26028	104	223	0.533632	0.466368	0.858027	0.17426	-	-	Bipolar	chaotic aneuploid	biparental
Embryo 19.B1	B	Chr14	25194	143	26028	124	267	0.535581	0.464419	0.889556	0.135306	-	-	Bipolar	chaotic aneuploid	biparental
Embryo 19.B1	B	Chr15	25194	71	26028	85	156	0.455128	0.544872	0.148967	0.885171	-	-	Bipolar	chaotic aneuploid	biparental
Embryo 19.B1	B	Chr16	25194	67	26028	92	159	0.421384	0.578616	0.028328	0.980561	-	-	Bipolar	chaotic aneuploid	biparental
Embryo 19.B1	B	Chr17	25194	93	26028	95	188	0.494681	0.505319	0.470943	0.58656	-	-	Bipolar	chaotic aneuploid	biparental
Embryo 19.B1	B	Chr18	25194	58	26028	118	176	0.329545	0.670455	3.58568e-06	0.999998	sig	-	Bipolar	chaotic aneuploid	biparental
Embryo 19.B1	B	Chr19	25194	4	26028	15	19	0.210526	0.789474	0.00960541	0.997787	-	-	Bipolar	chaotic aneuploid	biparental
Embryo 19.B1	B	Chr20	25194	109	26028	92	201	0.542289	0.457711	0.897947	0.129517	-	-	Bipolar	chaotic aneuploid	biparental
Embryo 19.B1	B	ChrUn	25194	17	26028	20	37	0.459459	0.540541	0.371415	0.744312	-	-	Bipolar	chaotic aneuploid	biparental
Embryo 19.B1	B	ChrX	25194	56	26028	14	70	0.8	0.2	1	2.15142e-07	-	sig	Bipolar	chaotic aneuploid	biparental
Embryo 19.B2	B	Chr1	25194	212	26028	302	514	0.412451	0.587549	4.16167e-05	0.999971	-	-	Bipolar	chaotic aneuploid	biparental
Embryo 19.B2	B	Chr2	25194	279	26028	311	590	0.472881	0.527119	0.100914	0.912887	-	-	Bipolar	chaotic aneuploid	biparental
Embryo 19.B2	B	Chr3	25194	249	26028	254	503	0.49503	0.50497	0.429235	0.605452	-	-	Bipolar	chaotic aneuploid	biparental
Embryo 19.B2	B	Chr4	25194	228	26028	213	441	0.517007	0.482993	0.776923	0.252515	-	-	Bipolar	chaotic aneuploid	biparental
Embryo 19.B2	B	Chr5	25194	247	26028	245	492	0.502033	0.497967	0.553784	0.482023	-	-	Bipolar	chaotic aneuploid	biparental
Embryo 19.B2	B	Chr6	25194	195	26028	170	365	0.534247	0.465753	0.913269	0.104489	-	-	Bipolar	chaotic aneuploid	biparental
Embryo 19.B2	B	Chr7	25194	209	26028	172	381	0.548556	0.451444	0.974292	0.0324965	-	-	Bipolar	chaotic aneuploid	biparental
Embryo 19.B2	B	Chr8	25194	185	26028	127	312	0.592949	0.407051	0.999595	0.000607785	-	-	Bipolar	chaotic aneuploid	biparental
Embryo 19.B2	B	Chr9	25194	182	26028	175	357	0.509804	0.490196	0.66397	0.375437	-	-	Bipolar	chaotic aneuploid	biparental
Embryo 19.B2	B	Chr10	25194	126	26028	114	240	0.525	0.475	0.799282	0.238876	-	-	Bipolar	chaotic aneuploid	biparental
Embryo 19.B2	B	Chr11	25194	104	26028	143	247	0.421053	0.578947	0.0077205	0.994612	-	-	Bipolar	chaotic aneuploid	biparental
Embryo 19.B2	B	Chr12	25194	160	26028	165	325	0.492308	0.507692	0.412225	0.630336	-	-	Bipolar	chaotic aneuploid	biparental
Embryo 19.B2	B	Chr13	25194	162	26028	139	301	0.538206	0.461794	0.916773	0.102351	-	-	Bipolar	chaotic aneuploid	biparental
Embryo 19.B2	B	Chr14	25194	152	26028	313	465	0.326882	0.673118	3.31581e-14	1	sig	-	Bipolar	chaotic aneuploid	biparental
Embryo 19.B2	B	Chr15	25194	135	26028	143	278	0.485612	0.514388	0.337342	0.705287	-	-	Bipolar	chaotic aneuploid	biparental
Embryo 19.B2	B	Chr16	25194	91	26028	104	195	0.466667	0.533333	0.195104	0.841963	-	-	Bipolar	chaotic aneuploid	biparental
Embryo 19.B2	B	Chr17	25194	96	26028	126	222	0.432432	0.567568	0.0256836	0.981383	-	-	Bipolar	chaotic aneuploid	biparental
Embryo 19.B2	B	Chr18	25194	73	26028	100	173	0.421965	0.578035	0.0238782	0.983515	-	-	Bipolar	chaotic aneuploid	biparental
Embryo 19.B2	B	Chr19	25194	16	26028	30	46	0.347826	0.652174	0.027038	0.987052	-	-	Bipolar	chaotic aneuploid	biparental
Embryo 19.B2	B	Chr20	25194	114	26028	79	193	0.590674	0.409326	0.995309	0.00708939	-	-	Bipolar	chaotic aneuploid	biparental
Embryo 19.B2	B	ChrUn	25194	26	26028	22	48	0.541667	0.458333	0.76456	0.332733	-	-	Bipolar	chaotic aneuploid	biparental
Embryo 19.B2	B	ChrX	25194	96	26028	18	114	0.842105	0.157895	1	2.36072e-14	-	sig	Bipolar	chaotic aneuploid	biparental
Embryo 19.B3	B	Chr1	25194	316	26028	249	565	0.559292	0.440708	0.997907	0.00272295	-	-	Bipolar	chaotic aneuploid	biparental
Embryo 19.B3	B	Chr2	25194	289	26028	267	556	0.519784	0.480216	0.835321	0.18658	-	-	Bipolar	chaotic aneuploid	biparental
Embryo 19.B3	B	Chr3	25194	148	26028	265	413	0.358354	0.641646	4.58413e-09	1	sig	-	Bipolar	chaotic aneuploid	biparental
Embryo 19.B3	B	Chr4	25194	208	26028	255	463	0.449244	0.550756	0.0162106	0.987204	-	-	Bipolar	chaotic aneuploid	biparental
Embryo 19.B3	B	Chr5	25194	236	26028	239	475	0.496842	0.503158	0.463448	0.572798	-	-	Bipolar	chaotic aneuploid	biparental
Embryo 19.B3	B	Chr6	25194	234	26028	222	456	0.513158	0.486842	0.728642	0.303258	-	-	Bipolar	chaotic aneuploid	biparental
Embryo 19.B3	B	Chr7	25194	234	26028	193	427	0.548009	0.451991	0.979013	0.0263864	-	-	Bipolar	chaotic aneuploid	biparental
Embryo 19.B3	B	Chr8	25194	237	26028	194	431	0.549884	0.450116	0.983032	0.0214706	-	-	Bipolar	chaotic aneuploid	biparental
Embryo 19.B3	B	Chr9	25194	196	26028	162	358	0.547486	0.452514	0.967905	0.0404981	-	-	Bipolar	chaotic aneuploid	biparental
Embryo 19.B3	B	Chr10	25194	173	26028	112	285	0.607018	0.392982	0.999886	0.000180975	-	-	Bipolar	chaotic aneuploid	biparental
Embryo 19.B3	B	Chr11	25194	199	26028	156	355	0.560563	0.439437	0.990299	0.0128335	-	-	Bipolar	chaotic aneuploid	biparental
Embryo 19.B3	B	Chr12	25194	130	26028	158	288	0.451389	0.548611	0.0557266	0.956348	-	-	Bipolar	chaotic aneuploid	biparental
Embryo 19.B3	B	Chr13	25194	156	26028	139	295	0.528814	0.471186	0.852687	0.175792	-	-	Bipolar	chaotic aneuploid	biparental
Embryo 19.B3	B	Chr14	25194	153	26028	44	197	0.77665	0.22335	1	1.302e-15	-	sig	Bipolar	chaotic aneuploid	biparental
Embryo 19.B3	B	Chr15	25194	153	26028	134	287	0.533101	0.466899	0.881138	0.143994	-	-	Bipolar	chaotic aneuploid	biparental
Embryo 19.B3	B	Chr16	25194	104	26028	99	203	0.512315	0.487685	0.663113	0.389494	-	-	Bipolar	chaotic aneuploid	biparental
Embryo 19.B3	B	Chr17	25194	141	26028	121	262	0.538168	0.461832	0.902799	0.120205	-	-	Bipolar	chaotic aneuploid	biparental
Embryo 19.B3	B	Chr18	25194	103	26028	114	217	0.474654	0.525346	0.248663	0.792322	-	-	Bipolar	chaotic aneuploid	biparental
Embryo 19.B3	B	Chr19	25194	61	26028	31	92	0.663043	0.336957	0.999445	0.0011573	-	-	Bipolar	chaotic aneuploid	biparental
Embryo 19.B3	B	Chr20	25194	122	26028	122	244	0.5	0.5	0.525514	0.525514	-	-	Bipolar	chaotic aneuploid	biparental
Embryo 19.B3	B	ChrUn	25194	26	26028	28	54	0.481481	0.518519	0.445962	0.658255	-	-	Bipolar	chaotic aneuploid	biparental
Embryo 19.B3	B	ChrX	25194	65	26028	16	81	0.802469	0.197531	1	1.8207e-08	-	sig	Bipolar	chaotic aneuploid	biparental
Embryo 19.B4	B	Chr1	25194	149	26028	168	317	0.470032	0.529968	0.156012	0.869364	-	-	Bipolar	chaotic aneuploid	biparental
Embryo 19.B4	B	Chr2	25194	184	26028	226	410	0.44878	0.55122	0.021376	0.983212	-	-	Bipolar	chaotic aneuploid	biparental
Embryo 19.B4	B	Chr3	25194	121	26028	269	390	0.310256	0.689744	2.44254e-14	1	sig	-	Bipolar	chaotic aneuploid	biparental
Embryo 19.B4	B	Chr4	25194	42	26028	122	164	0.256098	0.743902	1.52623e-10	1	sig	-	Bipolar	chaotic aneuploid	biparental
Embryo 19.B4	B	Chr5	25194	167	26028	29	196	0.852041	0.147959	1	4.59062e-25	-	sig	Bipolar	chaotic aneuploid	biparental
Embryo 19.B4	B	Chr6	25194	192	26028	57	249	0.771084	0.228916	1	1.40461e-18	-	sig	Bipolar	chaotic aneuploid	biparental
Embryo 19.B4	B	Chr7	25194	82	26028	33	115	0.713043	0.286957	0.999999	2.78571e-06	-	sig	Bipolar	chaotic aneuploid	biparental
Embryo 19.B4	B	Chr8	25194	74	26028	159	233	0.317597	0.682403	1.32165e-08	1	sig	-	Bipolar	chaotic aneuploid	biparental
Embryo 19.B4	B	Chr9	25194	65	26028	68	133	0.488722	0.511278	0.431202	0.635573	-	-	Bipolar	chaotic aneuploid	biparental
Embryo 19.B4	B	Chr10	25194	40	26028	175	215	0.186047	0.813953	1.23953e-21	1	sig	-	Bipolar	chaotic aneuploid	biparental
Embryo 19.B4	B	Chr11	25194	100	26028	53	153	0.653595	0.346405	0.999954	8.99264e-05	-	-	Bipolar	chaotic aneuploid	biparental
Embryo 19.B4	B	Chr12	25194	110	26028	107	217	0.506912	0.493088	0.606974	0.446022	-	-	Bipolar	chaotic aneuploid	biparental
Embryo 19.B4	B	Chr13	25194	26	26028	125	151	0.172185	0.827815	5.00047e-17	1	sig	-	Bipolar	chaotic aneuploid	biparental
Embryo 19.B4	B	Chr14	25194	20	26028	120	140	0.142857	0.857143	7.09417e-19	1	sig	-	Bipolar	chaotic aneuploid	biparental
Embryo 19.B4	B	Chr15	25194	132	26028	79	211	0.625592	0.374408	0.999907	0.000161011	-	-	Bipolar	chaotic aneuploid	biparental
Embryo 19.B4	B	Chr16	25194	46	26028	44	90	0.511111	0.488889	0.623983	0.458064	-	-	Bipolar	chaotic aneuploid	biparental
Embryo 19.B4	B	Chr17	25194	43	26028	23	66	0.651515	0.348485	0.995395	0.00932863	-	-	Bipolar	chaotic aneuploid	biparental
Embryo 19.B4	B	Chr18	25194	31	26028	6	37	0.837838	0.162162	0.999996	2.06288e-05	-	-	Bipolar	chaotic aneuploid	biparental
Embryo 19.B4	B	Chr19	25194	100	26028	27	127	0.787402	0.212598	1	2.36426e-11	-	sig	Bipolar	chaotic aneuploid	biparental
Embryo 19.B4	B	Chr20	25194	73	26028	58	131	0.557252	0.442748	0.919059	0.110558	-	-	Bipolar	chaotic aneuploid	biparental
Embryo 19.B4	B	ChrUn	25194	12	26028	13	25	0.48	0.52	0.5	0.654981	-	-	Bipolar	chaotic aneuploid	biparental
Embryo 19.B4	B	ChrX	25194	34	26028	5	39	0.871795	0.128205	1	1.21495e-06	-	sig	Bipolar	chaotic aneuploid	biparental
Embryo 20.B1	B	Chr1	25194	10	26028	7	17	0.588235	0.411765	0.833847	0.314529	-	-	Multipolar	chaotic aneuploid	gynogenetic
Embryo 20.B1	B	Chr2	25194	8	26028	7	15	0.533333	0.466667	0.696381	0.5	-	-	Multipolar	chaotic aneuploid	gynogenetic
Embryo 20.B1	B	Chr3	25194	114	26028	23	137	0.832117	0.167883	1	5.45254e-16	-	sig	Multipolar	chaotic aneuploid	gynogenetic
Embryo 20.B1	B	Chr4	25194	9	26028	3	12	0.75	0.25	0.980713	0.072998	-	-	Multipolar	chaotic aneuploid	gynogenetic
Embryo 20.B1	B	Chr5	25194	5	26028	7	12	0.416667	0.583333	0.387207	0.806152	-	-	Multipolar	chaotic aneuploid	gynogenetic
Embryo 20.B1	B	Chr6	25194	5	26028	5	10	0.5	0.5	0.623047	0.623047	-	-	Multipolar	chaotic aneuploid	gynogenetic
Embryo 20.B1	B	Chr7	25194	6	26028	4	10	0.6	0.4	0.828125	0.376953	-	-	Multipolar	chaotic aneuploid	gynogenetic
Embryo 20.B1	B	Chr8	25194	2	26028	5	7	0.285714	0.714286	0.226562	0.9375	-	-	Multipolar	chaotic aneuploid	gynogenetic
Embryo 20.B1	B	Chr9	25194	5	26028	2	7	0.714286	0.285714	0.9375	0.226562	-	-	Multipolar	chaotic aneuploid	gynogenetic
Embryo 20.B1	B	Chr10	25194	9	26028	5	14	0.642857	0.357143	0.910217	0.211975	-	-	Multipolar	chaotic aneuploid	gynogenetic
Embryo 20.B1	B	Chr11	25194	3	26028	10	13	0.230769	0.769231	0.0461426	0.98877	-	-	Multipolar	chaotic aneuploid	gynogenetic
Embryo 20.B1	B	Chr12	25194	8	26028	3	11	0.727273	0.272727	0.967285	0.113281	-	-	Multipolar	chaotic aneuploid	gynogenetic
Embryo 20.B1	B	Chr13	25194	8	26028	3	11	0.727273	0.272727	0.967285	0.113281	-	-	Multipolar	chaotic aneuploid	gynogenetic
Embryo 20.B1	B	Chr14	25194	4	26028	6	10	0.4	0.6	0.376953	0.828125	-	-	Multipolar	chaotic aneuploid	gynogenetic
Embryo 20.B1	B	Chr15	25194	3	26028	3	6	0.5	0.5	0.65625	0.65625	-	-	Multipolar	chaotic aneuploid	gynogenetic
Embryo 20.B1	B	Chr16	25194	0	26028	2	2	0	1	0.25	1	-	-	Multipolar	chaotic aneuploid	gynogenetic
Embryo 20.B1	B	Chr17	25194	3	26028	4	7	0.428571	0.571429	0.5	0.773438	-	-	Multipolar	chaotic aneuploid	gynogenetic
Embryo 20.B1	B	Chr18	25194	1	26028	4	5	0.2	0.8	0.1875	0.96875	-	-	Multipolar	chaotic aneuploid	gynogenetic
Embryo 20.B1	B	Chr19	25194	0	26028	2	2	0	1	0.25	1	-	-	Multipolar	chaotic aneuploid	gynogenetic
Embryo 20.B1	B	Chr20	25194	4	26028	5	9	0.444444	0.555556	0.5	0.746094	-	-	Multipolar	chaotic aneuploid	gynogenetic
Embryo 20.B1	B	ChrUn	25194	1	26028	0	1	1	0	1	0.5	-	-	Multipolar	chaotic aneuploid	gynogenetic
Embryo 20.B1	B	ChrX	25194	6	26028	1	7	0.857143	0.142857	0.992188	0.0625	-	-	Multipolar	chaotic aneuploid	gynogenetic
Embryo 20.B2	B	Chr1	25194	821	26028	158	979	0.838611	0.161389	1	6.86155e-109	-	sig	Multipolar	chaotic aneuploid	gynogenetic
Embryo 20.B2	B	Chr2	25194	4	26028	2	6	0.666667	0.333333	0.890625	0.34375	-	-	Multipolar	chaotic aneuploid	gynogenetic
Embryo 20.B2	B	Chr3	25194	5	26028	2	7	0.714286	0.285714	0.9375	0.226562	-	-	Multipolar	chaotic aneuploid	gynogenetic
Embryo 20.B2	B	Chr4	25194	3	26028	0	3	1	0	1	0.125	-	-	Multipolar	chaotic aneuploid	gynogenetic
Embryo 20.B2	B	Chr5	25194	0	26028	4	4	0	1	0.0625	1	-	-	Multipolar	chaotic aneuploid	gynogenetic
Embryo 20.B2	B	Chr6	25194	4	26028	2	6	0.666667	0.333333	0.890625	0.34375	-	-	Multipolar	chaotic aneuploid	gynogenetic
Embryo 20.B2	B	Chr7	25194	3	26028	2	5	0.6	0.4	0.8125	0.5	-	-	Multipolar	chaotic aneuploid	gynogenetic
Embryo 20.B2	B	Chr8	25194	2	26028	1	3	0.666667	0.333333	0.875	0.5	-	-	Multipolar	chaotic aneuploid	gynogenetic
Embryo 20.B2	B	Chr9	25194	513	26028	125	638	0.804075	0.195925	1	5.42715e-57	-	sig	Multipolar	chaotic aneuploid	gynogenetic
Embryo 20.B2	B	Chr10	25194	1	26028	2	3	0.333333	0.666667	0.5	0.875	-	-	Multipolar	chaotic aneuploid	gynogenetic
Embryo 20.B2	B	Chr11					0			1	1	-	-	Multipolar	chaotic aneuploid	gynogenetic
Embryo 20.B2	B	Chr12	25194	0	26028	1	1	0	1	0.5	1	-	-	Multipolar	chaotic aneuploid	gynogenetic
Embryo 20.B2	B	Chr13					0			1	1	-	-	Multipolar	chaotic aneuploid	gynogenetic
Embryo 20.B2	B	Chr14	25194	548	26028	101	649	0.844376	0.155624	1	1.63413e-75	-	sig	Multipolar	chaotic aneuploid	gynogenetic
Embryo 20.B2	B	Chr15	25194	395	26028	79	474	0.833333	0.166667	1	7.07569e-52	-	sig	Multipolar	chaotic aneuploid	gynogenetic
Embryo 20.B2	B	Chr16	25194	280	26028	53	333	0.840841	0.159159	1	1.014e-38	-	sig	Multipolar	chaotic aneuploid	gynogenetic
Embryo 20.B2	B	Chr17	25194	3	26028	0	3	1	0	1	0.125	-	-	Multipolar	chaotic aneuploid	gynogenetic
Embryo 20.B2	B	Chr18	25194	1	26028	0	1	1	0	1	0.5	-	-	Multipolar	chaotic aneuploid	gynogenetic
Embryo 20.B2	B	Chr19	25194	1	26028	1	2	0.5	0.5	0.75	0.75	-	-	Multipolar	chaotic aneuploid	gynogenetic
Embryo 20.B2	B	Chr20	25194	1	26028	0	1	1	0	1	0.5	-	-	Multipolar	chaotic aneuploid	gynogenetic
Embryo 20.B2	B	ChrUn	25194	12	26028	0	12	1	0	1	0.000244141	-	-	Multipolar	chaotic aneuploid	gynogenetic
Embryo 20.B2	B	ChrX	25194	2	26028	1	3	0.666667	0.333333	0.875	0.5	-	-	Multipolar	chaotic aneuploid	gynogenetic
Embryo 20.B4	B	Chr1	25194	1	26028	3	4	0.25	0.75	0.3125	0.9375	-	-	Multipolar	chaotic aneuploid	gynogenetic
Embryo 20.B4	B	Chr2	25194	5	26028	3	8	0.625	0.375	0.855469	0.363281	-	-	Multipolar	chaotic aneuploid	gynogenetic
Embryo 20.B4	B	Chr3	25194	5	26028	1	6	0.833333	0.166667	0.984375	0.109375	-	-	Multipolar	chaotic aneuploid	gynogenetic
Embryo 20.B4	B	Chr4	25194	519	26028	138	657	0.789954	0.210046	1	4.01687e-53	-	sig	Multipolar	chaotic aneuploid	gynogenetic
Embryo 20.B4	B	Chr5	25194	2	26028	8	10	0.2	0.8	0.0546875	0.989258	-	-	Multipolar	chaotic aneuploid	gynogenetic
Embryo 20.B4	B	Chr6	25194	962	26028	188	1150	0.836522	0.163478	1	7.2191e-126	-	sig	Multipolar	chaotic aneuploid	gynogenetic
Embryo 20.B4	B	Chr7	25194	2	26028	0	2	1	0	1	0.25	-	-	Multipolar	chaotic aneuploid	gynogenetic
Embryo 20.B4	B	Chr8	25194	2	26028	1	3	0.666667	0.333333	0.875	0.5	-	-	Multipolar	chaotic aneuploid	gynogenetic
Embryo 20.B4	B	Chr9	25194	3	26028	2	5	0.6	0.4	0.8125	0.5	-	-	Multipolar	chaotic aneuploid	gynogenetic
Embryo 20.B4	B	Chr10	25194	4	26028	1	5	0.8	0.2	0.96875	0.1875	-	-	Multipolar	chaotic aneuploid	gynogenetic
Embryo 20.B4	B	Chr11	25194	3	26028	1	4	0.75	0.25	0.9375	0.3125	-	-	Multipolar	chaotic aneuploid	gynogenetic
Embryo 20.B4	B	Chr12	25194	3	26028	2	5	0.6	0.4	0.8125	0.5	-	-	Multipolar	chaotic aneuploid	gynogenetic
Embryo 20.B4	B	Chr13	25194	4	26028	2	6	0.666667	0.333333	0.890625	0.34375	-	-	Multipolar	chaotic aneuploid	gynogenetic
Embryo 20.B4	B	Chr14	25194	1	26028	0	1	1	0	1	0.5	-	-	Multipolar	chaotic aneuploid	gynogenetic
Embryo 20.B4	B	Chr15					0			1	1	-	-	Multipolar	chaotic aneuploid	gynogenetic
Embryo 20.B4	B	Chr16	25194	1	26028	1	2	0.5	0.5	0.75	0.75	-	-	Multipolar	chaotic aneuploid	gynogenetic
Embryo 20.B4	B	Chr17	25194	4	26028	2	6	0.666667	0.333333	0.890625	0.34375	-	-	Multipolar	chaotic aneuploid	gynogenetic
Embryo 20.B4	B	Chr18	25194	0	26028	2	2	0	1	0.25	1	-	-	Multipolar	chaotic aneuploid	gynogenetic
Embryo 20.B4	B	Chr19					0			1	1	-	-	Multipolar	chaotic aneuploid	gynogenetic
Embryo 20.B4	B	Chr20	25194	1	26028	2	3	0.333333	0.666667	0.5	0.875	-	-	Multipolar	chaotic aneuploid	gynogenetic
Embryo 20.B4	B	ChrUn	25194	5	26028	5	10	0.5	0.5	0.623047	0.623047	-	-	Multipolar	chaotic aneuploid	gynogenetic
Embryo 20.B4	B	ChrX	25194	2	26028	0	2	1	0	1	0.25	-	-	Multipolar	chaotic aneuploid	gynogenetic
Embryo 20.B5	B	Chr1					0			1	1	-	-	Multipolar	chaotic aneuploid	gynogenetic
Embryo 20.B5	B	Chr2	25194	628	26028	129	757	0.82959	0.17041	1	7.87864e-80	-	sig	Multipolar	chaotic aneuploid	gynogenetic
Embryo 20.B5	B	Chr3	25194	1	26028	1	2	0.5	0.5	0.75	0.75	-	-	Multipolar	chaotic aneuploid	gynogenetic
Embryo 20.B5	B	Chr4	25194	5	26028	0	5	1	0	1	0.03125	-	-	Multipolar	chaotic aneuploid	gynogenetic
Embryo 20.B5	B	Chr5	25194	576	26028	121	697	0.826399	0.173601	1	3.95804e-72	-	sig	Multipolar	chaotic aneuploid	gynogenetic
Embryo 20.B5	B	Chr6	25194	522	26028	102	624	0.836538	0.163462	1	3.80339e-69	-	sig	Multipolar	chaotic aneuploid	gynogenetic
Embryo 20.B5	B	Chr7	25194	386	26028	104	490	0.787755	0.212245	1	1.88915e-39	-	sig	Multipolar	chaotic aneuploid	gynogenetic
Embryo 20.B5	B	Chr8	25194	386	26028	64	450	0.857778	0.142222	1	1.87357e-57	-	sig	Multipolar	chaotic aneuploid	gynogenetic
Embryo 20.B5	B	Chr9					0			1	1	-	-	Multipolar	chaotic aneuploid	gynogenetic
Embryo 20.B5	B	Chr10	25194	318	26028	68	386	0.823834	0.176166	1	4.70362e-40	-	sig	Multipolar	chaotic aneuploid	gynogenetic
Embryo 20.B5	B	Chr11	25194	409	26028	90	499	0.819639	0.180361	1	6.84352e-50	-	sig	Multipolar	chaotic aneuploid	gynogenetic
Embryo 20.B5	B	Chr12	25194	242	26028	45	287	0.843206	0.156794	1	4.33996e-34	-	sig	Multipolar	chaotic aneuploid	gynogenetic
Embryo 20.B5	B	Chr13	25194	343	26028	65	408	0.840686	0.159314	1	5.081e-47	-	sig	Multipolar	chaotic aneuploid	gynogenetic
Embryo 20.B5	B	Chr14	25194	1	26028	0	1	1	0	1	0.5	-	-	Multipolar	chaotic aneuploid	gynogenetic
Embryo 20.B5	B	Chr15	25194	1	26028	0	1	1	0	1	0.5	-	-	Multipolar	chaotic aneuploid	gynogenetic
Embryo 20.B5	B	Chr16					0			1	1	-	-	Multipolar	chaotic aneuploid	gynogenetic
Embryo 20.B5	B	Chr17	25194	323	26028	65	388	0.832474	0.167526	1	1.53366e-42	-	sig	Multipolar	chaotic aneuploid	gynogenetic
Embryo 20.B5	B	Chr18	25194	217	26028	61	278	0.780576	0.219424	1	5.54452e-22	-	sig	Multipolar	chaotic aneuploid	gynogenetic
Embryo 20.B5	B	Chr19	25194	94	26028	33	127	0.740157	0.259843	1	2.84314e-08	-	sig	Multipolar	chaotic aneuploid	gynogenetic
Embryo 20.B5	B	Chr20	25194	256	26028	57	313	0.817891	0.182109	1	1.45485e-31	-	sig	Multipolar	chaotic aneuploid	gynogenetic
Embryo 20.B5	B	ChrUn	25194	42	26028	7	49	0.857143	0.142857	1	1.81229e-07	-	sig	Multipolar	chaotic aneuploid	gynogenetic
Embryo 20.B5	B	ChrX	25194	208	26028	40	248	0.83871	0.16129	1	7.20607e-29	-	sig	Multipolar	chaotic aneuploid	gynogenetic
Embryo 20.B6	B	Chr1	25194	595	26028	123	718	0.828691	0.171309	1	2.28269e-75	-	sig	Multipolar	chaotic aneuploid	gynogenetic
Embryo 20.B6	B	Chr2	25194	5	26028	3	8	0.625	0.375	0.855469	0.363281	-	-	Multipolar	chaotic aneuploid	gynogenetic
Embryo 20.B6	B	Chr3	25194	734	26028	163	897	0.818283	0.181717	1	1.8629e-87	-	sig	Multipolar	chaotic aneuploid	gynogenetic
Embryo 20.B6	B	Chr4	25194	902	26028	224	1126	0.801066	0.198934	1	4.14895e-97	-	sig	Multipolar	chaotic aneuploid	gynogenetic
Embryo 20.B6	B	Chr5	25194	3	26028	1	4	0.75	0.25	0.9375	0.3125	-	-	Multipolar	chaotic aneuploid	gynogenetic
Embryo 20.B6	B	Chr6	25194	1	26028	1	2	0.5	0.5	0.75	0.75	-	-	Multipolar	chaotic aneuploid	gynogenetic
Embryo 20.B6	B	Chr7	25194	8	26028	1	9	0.888889	0.111111	0.998047	0.0195312	-	-	Multipolar	chaotic aneuploid	gynogenetic
Embryo 20.B6	B	Chr8					0			1	1	-	-	Multipolar	chaotic aneuploid	gynogenetic
Embryo 20.B6	B	Chr9	25194	400	26028	86	486	0.823045	0.176955	1	9.85555e-50	-	sig	Multipolar	chaotic aneuploid	gynogenetic
Embryo 20.B6	B	Chr10	25194	1	26028	0	1	1	0	1	0.5	-	-	Multipolar	chaotic aneuploid	gynogenetic
Embryo 20.B6	B	Chr11	25194	1	26028	1	2	0.5	0.5	0.75	0.75	-	-	Multipolar	chaotic aneuploid	gynogenetic
Embryo 20.B6	B	Chr12	25194	11	26028	2	13	0.846154	0.153846	0.998291	0.0112305	-	-	Multipolar	chaotic aneuploid	gynogenetic
Embryo 20.B6	B	Chr13	25194	3	26028	2	5	0.6	0.4	0.8125	0.5	-	-	Multipolar	chaotic aneuploid	gynogenetic
Embryo 20.B6	B	Chr14	25194	385	26028	64	449	0.857461	0.142539	1	3.21586e-57	-	sig	Multipolar	chaotic aneuploid	gynogenetic
Embryo 20.B6	B	Chr15	25194	150	26028	32	182	0.824176	0.175824	1	9.08824e-20	-	sig	Multipolar	chaotic aneuploid	gynogenetic
Embryo 20.B6	B	Chr16	25194	246	26028	52	298	0.825503	0.174497	1	1.23904e-31	-	sig	Multipolar	chaotic aneuploid	gynogenetic
Embryo 20.B6	B	Chr17					0			1	1	-	-	Multipolar	chaotic aneuploid	gynogenetic
Embryo 20.B6	B	Chr18	25194	1	26028	2	3	0.333333	0.666667	0.5	0.875	-	-	Multipolar	chaotic aneuploid	gynogenetic
Embryo 20.B6	B	Chr19	25194	1	26028	1	2	0.5	0.5	0.75	0.75	-	-	Multipolar	chaotic aneuploid	gynogenetic
Embryo 20.B6	B	Chr20					0			1	1	-	-	Multipolar	chaotic aneuploid	gynogenetic
Embryo 20.B6	B	ChrUn	25194	20	26028	7	27	0.740741	0.259259	0.997038	0.00957865	-	-	Multipolar	chaotic aneuploid	gynogenetic
Embryo 20.B6	B	ChrX	25194	3	26028	1	4	0.75	0.25	0.9375	0.3125	-	-	Multipolar	chaotic aneuploid	gynogenetic
Embryo 20.F1	CCF	Chr1	25194	10	26028	5	15	0.666667	0.333333	0.940765	0.150879	-	-	Multipolar	chaotic aneuploid	gynogenetic
Embryo 20.F1	CCF	Chr1	25194	1	26028	0	1	1	0	1	0.5	-	-	Multipolar	chaotic aneuploid	gynogenetic
Embryo 20.F1	CCF	Chr2	25194	11	26028	4	15	0.733333	0.266667	0.982422	0.0592346	-	-	Multipolar	chaotic aneuploid	gynogenetic
Embryo 20.F1	CCF	Chr2					0			1	1	-	-	Multipolar	chaotic aneuploid	gynogenetic
Embryo 20.F1	CCF	Chr3	25194	11	26028	9	20	0.55	0.45	0.748278	0.411901	-	-	Multipolar	chaotic aneuploid	gynogenetic
Embryo 20.F1	CCF	Chr3	25194	0	26028	2	2	0	1	0.25	1	-	-	Multipolar	chaotic aneuploid	gynogenetic
Embryo 20.F1	CCF	Chr4	25194	4	26028	4	8	0.5	0.5	0.636719	0.636719	-	-	Multipolar	chaotic aneuploid	gynogenetic
Embryo 20.F1	CCF	Chr4	25194	0	26028	1	1	0	1	0.5	1	-	-	Multipolar	chaotic aneuploid	gynogenetic
Embryo 20.F1	CCF	Chr5	25194	6	26028	2	8	0.75	0.25	0.964844	0.144531	-	-	Multipolar	chaotic aneuploid	gynogenetic
Embryo 20.F1	CCF	Chr5					0			1	1	-	-	Multipolar	chaotic aneuploid	gynogenetic
Embryo 20.F1	CCF	Chr6	25194	10	26028	5	15	0.666667	0.333333	0.940765	0.150879	-	-	Multipolar	chaotic aneuploid	gynogenetic
Embryo 20.F1	CCF	Chr6					0			1	1	-	-	Multipolar	chaotic aneuploid	gynogenetic
Embryo 20.F1	CCF	Chr7	25194	6	26028	3	9	0.666667	0.333333	0.910156	0.253906	-	-	Multipolar	chaotic aneuploid	gynogenetic
Embryo 20.F1	CCF	Chr7					0			1	1	-	-	Multipolar	chaotic aneuploid	gynogenetic
Embryo 20.F1	CCF	Chr8	25194	5	26028	2	7	0.714286	0.285714	0.9375	0.226562	-	-	Multipolar	chaotic aneuploid	gynogenetic
Embryo 20.F1	CCF	Chr8					0			1	1	-	-	Multipolar	chaotic aneuploid	gynogenetic
Embryo 20.F1	CCF	Chr9	25194	3	26028	3	6	0.5	0.5	0.65625	0.65625	-	-	Multipolar	chaotic aneuploid	gynogenetic
Embryo 20.F1	CCF	Chr9					0			1	1	-	-	Multipolar	chaotic aneuploid	gynogenetic
Embryo 20.F1	CCF	Chr10	25194	3	26028	1	4	0.75	0.25	0.9375	0.3125	-	-	Multipolar	chaotic aneuploid	gynogenetic
Embryo 20.F1	CCF	Chr10					0			1	1	-	-	Multipolar	chaotic aneuploid	gynogenetic
Embryo 20.F1	CCF	Chr11	25194	7	26028	6	13	0.538462	0.461538	0.709473	0.5	-	-	Multipolar	chaotic aneuploid	gynogenetic
Embryo 20.F1	CCF	Chr11					0			1	1	-	-	Multipolar	chaotic aneuploid	gynogenetic
Embryo 20.F1	CCF	Chr12	25194	4	26028	3	7	0.571429	0.428571	0.773438	0.5	-	-	Multipolar	chaotic aneuploid	gynogenetic
Embryo 20.F1	CCF	Chr12					0			1	1	-	-	Multipolar	chaotic aneuploid	gynogenetic
Embryo 20.F1	CCF	Chr13	25194	7	26028	2	9	0.777778	0.222222	0.980469	0.0898438	-	-	Multipolar	chaotic aneuploid	gynogenetic
Embryo 20.F1	CCF	Chr13					0			1	1	-	-	Multipolar	chaotic aneuploid	gynogenetic
Embryo 20.F1	CCF	Chr14	25194	6	26028	0	6	1	0	1	0.015625	-	-	Multipolar	chaotic aneuploid	gynogenetic
Embryo 20.F1	CCF	Chr14					0			1	1	-	-	Multipolar	chaotic aneuploid	gynogenetic
Embryo 20.F1	CCF	Chr15	25194	8	26028	3	11	0.727273	0.272727	0.967285	0.113281	-	-	Multipolar	chaotic aneuploid	gynogenetic
Embryo 20.F1	CCF	Chr15					0			1	1	-	-	Multipolar	chaotic aneuploid	gynogenetic
Embryo 20.F1	CCF	Chr16	25194	7	26028	4	11	0.636364	0.363636	0.886719	0.274414	-	-	Multipolar	chaotic aneuploid	gynogenetic
Embryo 20.F1	CCF	Chr16					0			1	1	-	-	Multipolar	chaotic aneuploid	gynogenetic
Embryo 20.F1	CCF	Chr17	25194	10	26028	4	14	0.714286	0.285714	0.971313	0.0897827	-	-	Multipolar	chaotic aneuploid	gynogenetic
Embryo 20.F1	CCF	Chr17					0			1	1	-	-	Multipolar	chaotic aneuploid	gynogenetic
Embryo 20.F1	CCF	Chr18	25194	6	26028	3	9	0.666667	0.333333	0.910156	0.253906	-	-	Multipolar	chaotic aneuploid	gynogenetic
Embryo 20.F1	CCF	Chr18					0			1	1	-	-	Multipolar	chaotic aneuploid	gynogenetic
Embryo 20.F1	CCF	Chr19	25194	142	26028	33	175	0.811429	0.188571	1	1.29996e-17	-	sig	Multipolar	chaotic aneuploid	gynogenetic
Embryo 20.F1	CCF	Chr19	25194	9	26028	2	11	0.818182	0.181818	0.994141	0.0327148	-	-	Multipolar	chaotic aneuploid	gynogenetic
Embryo 20.F1	CCF	Chr20	25194	3	26028	1	4	0.75	0.25	0.9375	0.3125	-	-	Multipolar	chaotic aneuploid	gynogenetic
Embryo 20.F1	CCF	Chr20					0			1	1	-	-	Multipolar	chaotic aneuploid	gynogenetic
Embryo 20.F1	CCF	ChrUn	25194	3	26028	3	6	0.5	0.5	0.65625	0.65625	-	-	Multipolar	chaotic aneuploid	gynogenetic
Embryo 20.F1	CCF	ChrUn					0			1	1	-	-	Multipolar	chaotic aneuploid	gynogenetic
Embryo 20.F1	CCF	ChrX	25194	3	26028	1	4	0.75	0.25	0.9375	0.3125	-	-	Multipolar	chaotic aneuploid	gynogenetic
Embryo 20.F1	CCF	ChrX					0			1	1	-	-	Multipolar	chaotic aneuploid	gynogenetic
Embryo 20.F5	CCF	Chr1	25194	19	26028	5	24	0.791667	0.208333	0.999228	0.00330538	-	-	Multipolar	chaotic aneuploid	gynogenetic
Embryo 20.F5	CCF	Chr1	25194	0	26028	1	1	0	1	0.5	1	-	-	Multipolar	chaotic aneuploid	gynogenetic
Embryo 20.F5	CCF	Chr2	25194	7	26028	8	15	0.466667	0.533333	0.5	0.696381	-	-	Multipolar	chaotic aneuploid	gynogenetic
Embryo 20.F5	CCF	Chr2	25194	1	26028	1	2	0.5	0.5	0.75	0.75	-	-	Multipolar	chaotic aneuploid	gynogenetic
Embryo 20.F5	CCF	Chr3	25194	14	26028	7	21	0.666667	0.333333	0.960823	0.0946236	-	-	Multipolar	chaotic aneuploid	gynogenetic
Embryo 20.F5	CCF	Chr3					0			1	1	-	-	Multipolar	chaotic aneuploid	gynogenetic
Embryo 20.F5	CCF	Chr4	25194	11	26028	7	18	0.611111	0.388889	0.881058	0.240341	-	-	Multipolar	chaotic aneuploid	gynogenetic
Embryo 20.F5	CCF	Chr4					0			1	1	-	-	Multipolar	chaotic aneuploid	gynogenetic
Embryo 20.F5	CCF	Chr5	25194	12	26028	8	20	0.6	0.4	0.868412	0.251722	-	-	Multipolar	chaotic aneuploid	gynogenetic
Embryo 20.F5	CCF	Chr5					0			1	1	-	-	Multipolar	chaotic aneuploid	gynogenetic
Embryo 20.F5	CCF	Chr6	25194	9	26028	6	15	0.6	0.4	0.849121	0.303619	-	-	Multipolar	chaotic aneuploid	gynogenetic
Embryo 20.F5	CCF	Chr6					0			1	1	-	-	Multipolar	chaotic aneuploid	gynogenetic
Embryo 20.F5	CCF	Chr7	25194	34	26028	8	42	0.809524	0.190476	0.999992	3.43856e-05	-	-	Multipolar	chaotic aneuploid	gynogenetic
Embryo 20.F5	CCF	Chr7	25194	2	26028	0	2	1	0	1	0.25	-	-	Multipolar	chaotic aneuploid	gynogenetic
Embryo 20.F5	CCF	Chr8	25194	5	26028	4	9	0.555556	0.444444	0.746094	0.5	-	-	Multipolar	chaotic aneuploid	gynogenetic
Embryo 20.F5	CCF	Chr8	25194	0	26028	1	1	0	1	0.5	1	-	-	Multipolar	chaotic aneuploid	gynogenetic
Embryo 20.F5	CCF	Chr9	25194	9	26028	5	14	0.642857	0.357143	0.910217	0.211975	-	-	Multipolar	chaotic aneuploid	gynogenetic
Embryo 20.F5	CCF	Chr9					0			1	1	-	-	Multipolar	chaotic aneuploid	gynogenetic
Embryo 20.F5	CCF	Chr10	25194	7	26028	2	9	0.777778	0.222222	0.980469	0.0898438	-	-	Multipolar	chaotic aneuploid	gynogenetic
Embryo 20.F5	CCF	Chr10	25194	0	26028	1	1	0	1	0.5	1	-	-	Multipolar	chaotic aneuploid	gynogenetic
Embryo 20.F5	CCF	Chr11	25194	1	26028	2	3	0.333333	0.666667	0.5	0.875	-	-	Multipolar	chaotic aneuploid	gynogenetic
Embryo 20.F5	CCF	Chr11	25194	0	26028	1	1	0	1	0.5	1	-	-	Multipolar	chaotic aneuploid	gynogenetic
Embryo 20.F5	CCF	Chr12	25194	11	26028	2	13	0.846154	0.153846	0.998291	0.0112305	-	-	Multipolar	chaotic aneuploid	gynogenetic
Embryo 20.F5	CCF	Chr12					0			1	1	-	-	Multipolar	chaotic aneuploid	gynogenetic
Embryo 20.F5	CCF	Chr13	25194	3	26028	2	5	0.6	0.4	0.8125	0.5	-	-	Multipolar	chaotic aneuploid	gynogenetic
Embryo 20.F5	CCF	Chr13					0			1	1	-	-	Multipolar	chaotic aneuploid	gynogenetic
Embryo 20.F5	CCF	Chr14	25194	6	26028	2	8	0.75	0.25	0.964844	0.144531	-	-	Multipolar	chaotic aneuploid	gynogenetic
Embryo 20.F5	CCF	Chr14					0			1	1	-	-	Multipolar	chaotic aneuploid	gynogenetic
Embryo 20.F5	CCF	Chr15	25194	6	26028	6	12	0.5	0.5	0.612793	0.612793	-	-	Multipolar	chaotic aneuploid	gynogenetic
Embryo 20.F5	CCF	Chr15					0			1	1	-	-	Multipolar	chaotic aneuploid	gynogenetic
Embryo 20.F5	CCF	Chr16	25194	6	26028	2	8	0.75	0.25	0.964844	0.144531	-	-	Multipolar	chaotic aneuploid	gynogenetic
Embryo 20.F5	CCF	Chr16					0			1	1	-	-	Multipolar	chaotic aneuploid	gynogenetic
Embryo 20.F5	CCF	Chr17	25194	6	26028	1	7	0.857143	0.142857	0.992188	0.0625	-	-	Multipolar	chaotic aneuploid	gynogenetic
Embryo 20.F5	CCF	Chr17					0			1	1	-	-	Multipolar	chaotic aneuploid	gynogenetic
Embryo 20.F5	CCF	Chr18	25194	4	26028	2	6	0.666667	0.333333	0.890625	0.34375	-	-	Multipolar	chaotic aneuploid	gynogenetic
Embryo 20.F5	CCF	Chr18	25194	1	26028	0	1	1	0	1	0.5	-	-	Multipolar	chaotic aneuploid	gynogenetic
Embryo 20.F5	CCF	Chr19	25194	3	26028	2	5	0.6	0.4	0.8125	0.5	-	-	Multipolar	chaotic aneuploid	gynogenetic
Embryo 20.F5	CCF	Chr19					0			1	1	-	-	Multipolar	chaotic aneuploid	gynogenetic
Embryo 20.F5	CCF	Chr20	25194	4	26028	8	12	0.333333	0.666667	0.193848	0.927002	-	-	Multipolar	chaotic aneuploid	gynogenetic
Embryo 20.F5	CCF	Chr20					0			1	1	-	-	Multipolar	chaotic aneuploid	gynogenetic
Embryo 20.F5	CCF	ChrUn	25194	4	26028	0	4	1	0	1	0.0625	-	-	Multipolar	chaotic aneuploid	gynogenetic
Embryo 20.F5	CCF	ChrUn					0			1	1	-	-	Multipolar	chaotic aneuploid	gynogenetic
Embryo 20.F5	CCF	ChrX	25194	5	26028	1	6	0.833333	0.166667	0.984375	0.109375	-	-	Multipolar	chaotic aneuploid	gynogenetic
Embryo 20.F5	CCF	ChrX					0			1	1	-	-	Multipolar	chaotic aneuploid	gynogenetic
Embryo 20.F9	CCF	Chr1	25194	20	26028	9	29	0.689655	0.310345	0.98794	0.0307142	-	-	Multipolar	chaotic aneuploid	gynogenetic
Embryo 20.F9	CCF	Chr1	25194	1	26028	0	1	1	0	1	0.5	-	-	Multipolar	chaotic aneuploid	gynogenetic
Embryo 20.F9	CCF	Chr2	25194	28	26028	8	36	0.777778	0.222222	0.999844	0.000596621	-	-	Multipolar	chaotic aneuploid	gynogenetic
Embryo 20.F9	CCF	Chr2					0			1	1	-	-	Multipolar	chaotic aneuploid	gynogenetic
Embryo 20.F9	CCF	Chr3	25194	28	26028	8	36	0.777778	0.222222	0.999844	0.000596621	-	-	Multipolar	chaotic aneuploid	gynogenetic
Embryo 20.F9	CCF	Chr3	25194	4	26028	0	4	1	0	1	0.0625	-	-	Multipolar	chaotic aneuploid	gynogenetic
Embryo 20.F9	CCF	Chr4	25194	19	26028	4	23	0.826087	0.173913	0.999756	0.00129974	-	-	Multipolar	chaotic aneuploid	gynogenetic
Embryo 20.F9	CCF	Chr4	25194	1	26028	0	1	1	0	1	0.5	-	-	Multipolar	chaotic aneuploid	gynogenetic
Embryo 20.F9	CCF	Chr5	25194	28	26028	6	34	0.823529	0.176471	0.999981	9.75628e-05	-	-	Multipolar	chaotic aneuploid	gynogenetic
Embryo 20.F9	CCF	Chr5	25194	2	26028	0	2	1	0	1	0.25	-	-	Multipolar	chaotic aneuploid	gynogenetic
Embryo 20.F9	CCF	Chr6	25194	19	26028	10	29	0.655172	0.344828	0.969286	0.068023	-	-	Multipolar	chaotic aneuploid	gynogenetic
Embryo 20.F9	CCF	Chr6	25194	2	26028	0	2	1	0	1	0.25	-	-	Multipolar	chaotic aneuploid	gynogenetic
Embryo 20.F9	CCF	Chr7	25194	18	26028	9	27	0.666667	0.333333	0.973881	0.0610391	-	-	Multipolar	chaotic aneuploid	gynogenetic
Embryo 20.F9	CCF	Chr7					0			1	1	-	-	Multipolar	chaotic aneuploid	gynogenetic
Embryo 20.F9	CCF	Chr8	25194	12	26028	8	20	0.6	0.4	0.868412	0.251722	-	-	Multipolar	chaotic aneuploid	gynogenetic
Embryo 20.F9	CCF	Chr8	25194	2	26028	1	3	0.666667	0.333333	0.875	0.5	-	-	Multipolar	chaotic aneuploid	gynogenetic
Embryo 20.F9	CCF	Chr9	25194	16	26028	3	19	0.842105	0.157895	0.999636	0.00221252	-	-	Multipolar	chaotic aneuploid	gynogenetic
Embryo 20.F9	CCF	Chr9					0			1	1	-	-	Multipolar	chaotic aneuploid	gynogenetic
Embryo 20.F9	CCF	Chr10	25194	9	26028	6	15	0.6	0.4	0.849121	0.303619	-	-	Multipolar	chaotic aneuploid	gynogenetic
Embryo 20.F9	CCF	Chr10	25194	1	26028	0	1	1	0	1	0.5	-	-	Multipolar	chaotic aneuploid	gynogenetic
Embryo 20.F9	CCF	Chr11	25194	17	26028	5	22	0.772727	0.227273	0.997828	0.00845027	-	-	Multipolar	chaotic aneuploid	gynogenetic
Embryo 20.F9	CCF	Chr11					0			1	1	-	-	Multipolar	chaotic aneuploid	gynogenetic
Embryo 20.F9	CCF	Chr12	25194	186	26028	31	217	0.857143	0.142857	1	1.95988e-28	-	sig	Multipolar	chaotic aneuploid	gynogenetic
Embryo 20.F9	CCF	Chr12	25194	9	26028	3	12	0.75	0.25	0.980713	0.072998	-	-	Multipolar	chaotic aneuploid	gynogenetic
Embryo 20.F9	CCF	Chr13	25194	16	26028	6	22	0.727273	0.272727	0.99155	0.0262394	-	-	Multipolar	chaotic aneuploid	gynogenetic
Embryo 20.F9	CCF	Chr13	25194	1	26028	0	1	1	0	1	0.5	-	-	Multipolar	chaotic aneuploid	gynogenetic
Embryo 20.F9	CCF	Chr14	25194	12	26028	7	19	0.631579	0.368421	0.916466	0.179642	-	-	Multipolar	chaotic aneuploid	gynogenetic
Embryo 20.F9	CCF	Chr14					0			1	1	-	-	Multipolar	chaotic aneuploid	gynogenetic
Embryo 20.F9	CCF	Chr15	25194	11	26028	5	16	0.6875	0.3125	0.961594	0.105057	-	-	Multipolar	chaotic aneuploid	gynogenetic
Embryo 20.F9	CCF	Chr15					0			1	1	-	-	Multipolar	chaotic aneuploid	gynogenetic
Embryo 20.F9	CCF	Chr16	25194	10	26028	3	13	0.769231	0.230769	0.98877	0.0461426	-	-	Multipolar	chaotic aneuploid	gynogenetic
Embryo 20.F9	CCF	Chr16	25194	1	26028	0	1	1	0	1	0.5	-	-	Multipolar	chaotic aneuploid	gynogenetic
Embryo 20.F9	CCF	Chr17	25194	2	26028	1	3	0.666667	0.333333	0.875	0.5	-	-	Multipolar	chaotic aneuploid	gynogenetic
Embryo 20.F9	CCF	Chr17					0			1	1	-	-	Multipolar	chaotic aneuploid	gynogenetic
Embryo 20.F9	CCF	Chr18	25194	11	26028	3	14	0.785714	0.214286	0.99353	0.0286865	-	-	Multipolar	chaotic aneuploid	gynogenetic
Embryo 20.F9	CCF	Chr18	25194	2	26028	0	2	1	0	1	0.25	-	-	Multipolar	chaotic aneuploid	gynogenetic
Embryo 20.F9	CCF	Chr19	25194	3	26028	2	5	0.6	0.4	0.8125	0.5	-	-	Multipolar	chaotic aneuploid	gynogenetic
Embryo 20.F9	CCF	Chr19					0			1	1	-	-	Multipolar	chaotic aneuploid	gynogenetic
Embryo 20.F9	CCF	Chr20	25194	5	26028	5	10	0.5	0.5	0.623047	0.623047	-	-	Multipolar	chaotic aneuploid	gynogenetic
Embryo 20.F9	CCF	Chr20					0			1	1	-	-	Multipolar	chaotic aneuploid	gynogenetic
Embryo 20.F9	CCF	ChrUn	25194	3	26028	0	3	1	0	1	0.125	-	-	Multipolar	chaotic aneuploid	gynogenetic
Embryo 20.F9	CCF	ChrUn					0			1	1	-	-	Multipolar	chaotic aneuploid	gynogenetic
Embryo 20.F9	CCF	ChrX	25194	11	26028	4	15	0.733333	0.266667	0.982422	0.0592346	-	-	Multipolar	chaotic aneuploid	gynogenetic
Embryo 20.F9	CCF	ChrX					0			1	1	-	-	Multipolar	chaotic aneuploid	gynogenetic
Embryo 21.B1	B	Chr1	25490	32	26028	121	153	0.20915	0.79085	1.11308e-13	1	sig	-	Multipolar	chaotic aneuploid	triploid or polyploid
Embryo 21.B1	B	Chr2	25490	602	26028	532	1134	0.530864	0.469136	0.982525	0.0202074	-	-	Multipolar	chaotic aneuploid	triploid or polyploid
Embryo 21.B1	B	Chr3	25490	26	26028	135	161	0.161491	0.838509	2.95176e-19	1	sig	-	Multipolar	chaotic aneuploid	triploid or polyploid
Embryo 21.B1	B	Chr4	25490	3	26028	1	4	0.75	0.25	0.9375	0.3125	-	-	Multipolar	chaotic aneuploid	triploid or polyploid
Embryo 21.B1	B	Chr5	25490	81	26028	19	100	0.81	0.19	1	1.35138e-10	-	sig	Multipolar	chaotic aneuploid	triploid or polyploid
Embryo 21.B1	B	Chr6	25490	2	26028	1	3	0.666667	0.333333	0.875	0.5	-	-	Multipolar	chaotic aneuploid	triploid or polyploid
Embryo 21.B1	B	Chr7	25490	131	26028	602	733	0.178718	0.821282	3.00198e-73	1	sig	-	Multipolar	chaotic aneuploid	triploid or polyploid
Embryo 21.B1	B	Chr8	25490	384	26028	51	435	0.882759	0.117241	1	1.44705e-64	-	sig	Multipolar	chaotic aneuploid	triploid or polyploid
Embryo 21.B1	B	Chr9	25490	1	26028	2	3	0.333333	0.666667	0.5	0.875	-	-	Multipolar	chaotic aneuploid	triploid or polyploid
Embryo 21.B1	B	Chr10	25490	99	26028	368	467	0.211991	0.788009	9.53811e-38	1	sig	-	Multipolar	chaotic aneuploid	triploid or polyploid
Embryo 21.B1	B	Chr11	25490	88	26028	420	508	0.173228	0.826772	3.52637e-53	1	sig	-	Multipolar	chaotic aneuploid	triploid or polyploid
Embryo 21.B1	B	Chr12	25490	469	26028	63	532	0.881579	0.118421	1	4.88491e-78	-	sig	Multipolar	chaotic aneuploid	triploid or polyploid
Embryo 21.B1	B	Chr13	25490	49	26028	264	313	0.15655	0.84345	4.36746e-37	1	sig	-	Multipolar	chaotic aneuploid	triploid or polyploid
Embryo 21.B1	B	Chr14	25490	323	26028	189	512	0.630859	0.369141	1	1.70297e-09	-	sig	Multipolar	chaotic aneuploid	triploid or polyploid
Embryo 21.B1	B	Chr15	25490	3	26028	2	5	0.6	0.4	0.8125	0.5	-	-	Multipolar	chaotic aneuploid	triploid or polyploid
Embryo 21.B1	B	Chr16					0			1	1	-	-	Multipolar	chaotic aneuploid	triploid or polyploid
Embryo 21.B1	B	Chr17	25490	448	26028	262	710	0.630986	0.369014	1	1.45123e-12	-	sig	Multipolar	chaotic aneuploid	triploid or polyploid
Embryo 21.B1	B	Chr18	25490	4	26028	1	5	0.8	0.2	0.96875	0.1875	-	-	Multipolar	chaotic aneuploid	triploid or polyploid
Embryo 21.B1	B	Chr19	25490	142	26028	30	172	0.825581	0.174419	1	6.29417e-19	-	sig	Multipolar	chaotic aneuploid	triploid or polyploid
Embryo 21.B1	B	Chr20	25490	0	26028	2	2	0	1	0.25	1	-	-	Multipolar	chaotic aneuploid	triploid or polyploid
Embryo 21.B1	B	ChrUn	25490	26	26028	36	62	0.419355	0.580645	0.126427	0.919059	-	-	Multipolar	chaotic aneuploid	triploid or polyploid
Embryo 21.B1	B	ChrX	25490	1	26028	4	5	0.2	0.8	0.1875	0.96875	-	-	Multipolar	chaotic aneuploid	triploid or polyploid
Embryo 21.B2	B	Chr1	25490	361	26028	98	459	0.786492	0.213508	1	9.82656e-37	-	sig	Multipolar	chaotic aneuploid	triploid or polyploid
Embryo 21.B2	B	Chr2	25490	132	26028	52	184	0.717391	0.282609	1	1.63756e-09	-	sig	Multipolar	chaotic aneuploid	triploid or polyploid
Embryo 21.B2	B	Chr3	25490	30	26028	137	167	0.179641	0.820359	7.70067e-18	1	sig	-	Multipolar	chaotic aneuploid	triploid or polyploid
Embryo 21.B2	B	Chr4	25490	3	26028	3	6	0.5	0.5	0.65625	0.65625	-	-	Multipolar	chaotic aneuploid	triploid or polyploid
Embryo 21.B2	B	Chr5	25490	839	26028	159	998	0.840681	0.159319	1	1.88163e-112	-	sig	Multipolar	chaotic aneuploid	triploid or polyploid
Embryo 21.B2	B	Chr6	25490	485	26028	99	584	0.830479	0.169521	1	2.35826e-62	-	sig	Multipolar	chaotic aneuploid	triploid or polyploid
Embryo 21.B2	B	Chr7	25490	5	26028	6	11	0.454545	0.545455	0.5	0.725586	-	-	Multipolar	chaotic aneuploid	triploid or polyploid
Embryo 21.B2	B	Chr8	25490	100	26028	437	537	0.18622	0.81378	1.62208e-51	1	sig	-	Multipolar	chaotic aneuploid	triploid or polyploid
Embryo 21.B2	B	Chr9	25490	135	26028	29	164	0.823171	0.176829	1	7.48884e-18	-	sig	Multipolar	chaotic aneuploid	triploid or polyploid
Embryo 21.B2	B	Chr10	25490	238	26028	47	285	0.835088	0.164912	1	3.31871e-32	-	sig	Multipolar	chaotic aneuploid	triploid or polyploid
Embryo 21.B2	B	Chr11					0			1	1	-	-	Multipolar	chaotic aneuploid	triploid or polyploid
Embryo 21.B2	B	Chr12	25490	346	26028	509	855	0.404678	0.595322	1.37596e-08	1	sig	-	Multipolar	chaotic aneuploid	triploid or polyploid
Embryo 21.B2	B	Chr13	25490	289	26028	76	365	0.791781	0.208219	1	1.15194e-30	-	sig	Multipolar	chaotic aneuploid	triploid or polyploid
Embryo 21.B2	B	Chr14	25490	224	26028	197	421	0.532067	0.467933	0.913853	0.102522	-	-	Multipolar	chaotic aneuploid	triploid or polyploid
Embryo 21.B2	B	Chr15	25490	166	26028	31	197	0.84264	0.15736	1	8.24763e-24	-	sig	Multipolar	chaotic aneuploid	triploid or polyploid
Embryo 21.B2	B	Chr16	25490	106	26028	21	127	0.834646	0.165354	1	3.7496e-15	-	sig	Multipolar	chaotic aneuploid	triploid or polyploid
Embryo 21.B2	B	Chr17	25490	204	26028	68	272	0.75	0.25	1	2.93083e-17	-	sig	Multipolar	chaotic aneuploid	triploid or polyploid
Embryo 21.B2	B	Chr18					0			1	1	-	-	Multipolar	chaotic aneuploid	triploid or polyploid
Embryo 21.B2	B	Chr19	25490	2	26028	0	2	1	0	1	0.25	-	-	Multipolar	chaotic aneuploid	triploid or polyploid
Embryo 21.B2	B	Chr20	25490	215	26028	44	259	0.830116	0.169884	1	1.61664e-28	-	sig	Multipolar	chaotic aneuploid	triploid or polyploid
Embryo 21.B2	B	ChrUn	25490	43	26028	11	54	0.796296	0.203704	0.999998	7.00653e-06	-	sig	Multipolar	chaotic aneuploid	triploid or polyploid
Embryo 21.B2	B	ChrX	25490	213	26028	36	249	0.855422	0.144578	1	4.57606e-32	-	sig	Multipolar	chaotic aneuploid	triploid or polyploid
Embryo 21.B3	B	Chr1	25490	3	26028	0	3	1	0	1	0.125	-	-	Multipolar	chaotic aneuploid	triploid or polyploid
Embryo 21.B3	B	Chr2	25490	1	26028	2	3	0.333333	0.666667	0.5	0.875	-	-	Multipolar	chaotic aneuploid	triploid or polyploid
Embryo 21.B3	B	Chr3	25490	1011	26028	180	1191	0.848866	0.151134	1	5.31235e-141	-	sig	Multipolar	chaotic aneuploid	triploid or polyploid
Embryo 21.B3	B	Chr4	25490	5	26028	1	6	0.833333	0.166667	0.984375	0.109375	-	-	Multipolar	chaotic aneuploid	triploid or polyploid
Embryo 21.B3	B	Chr5	25490	2	26028	1	3	0.666667	0.333333	0.875	0.5	-	-	Multipolar	chaotic aneuploid	triploid or polyploid
Embryo 21.B3	B	Chr6	25490	683	26028	125	808	0.845297	0.154703	1	4.06578e-94	-	sig	Multipolar	chaotic aneuploid	triploid or polyploid
Embryo 21.B3	B	Chr7	25490	952	26028	154	1106	0.860759	0.139241	1	3.38316e-141	-	sig	Multipolar	chaotic aneuploid	triploid or polyploid
Embryo 21.B3	B	Chr8	25490	628	26028	146	774	0.81137	0.18863	1	2.83368e-72	-	sig	Multipolar	chaotic aneuploid	triploid or polyploid
Embryo 21.B3	B	Chr9					0			1	1	-	-	Multipolar	chaotic aneuploid	triploid or polyploid
Embryo 21.B3	B	Chr10	25490	857	26028	113	970	0.883505	0.116495	1	1.85879e-142	-	sig	Multipolar	chaotic aneuploid	triploid or polyploid
Embryo 21.B3	B	Chr11	25490	855	26028	132	987	0.866261	0.133739	1	1.48513e-130	-	sig	Multipolar	chaotic aneuploid	triploid or polyploid
Embryo 21.B3	B	Chr12	25490	0	26028	1	1	0	1	0.5	1	-	-	Multipolar	chaotic aneuploid	triploid or polyploid
Embryo 21.B3	B	Chr13	25490	298	26028	51	349	0.853868	0.146132	1	7.00788e-44	-	sig	Multipolar	chaotic aneuploid	triploid or polyploid
Embryo 21.B3	B	Chr14	25490	3	26028	0	3	1	0	1	0.125	-	-	Multipolar	chaotic aneuploid	triploid or polyploid
Embryo 21.B3	B	Chr15	25490	1	26028	0	1	1	0	1	0.5	-	-	Multipolar	chaotic aneuploid	triploid or polyploid
Embryo 21.B3	B	Chr16	25490	1	26028	0	1	1	0	1	0.5	-	-	Multipolar	chaotic aneuploid	triploid or polyploid
Embryo 21.B3	B	Chr17	25490	2	26028	0	2	1	0	1	0.25	-	-	Multipolar	chaotic aneuploid	triploid or polyploid
Embryo 21.B3	B	Chr18	25490	2	26028	0	2	1	0	1	0.25	-	-	Multipolar	chaotic aneuploid	triploid or polyploid
Embryo 21.B3	B	Chr19	25490	34	26028	6	40	0.85	0.15	0.999999	4.18229e-06	-	sig	Multipolar	chaotic aneuploid	triploid or polyploid
Embryo 21.B3	B	Chr20	25490	1	26028	2	3	0.333333	0.666667	0.5	0.875	-	-	Multipolar	chaotic aneuploid	triploid or polyploid
Embryo 21.B3	B	ChrUn	25490	52	26028	22	74	0.702703	0.297297	0.999872	0.000321404	-	-	Multipolar	chaotic aneuploid	triploid or polyploid
Embryo 21.B3	B	ChrX	25490	21	26028	149	170	0.123529	0.876471	2.89355e-25	1	sig	-	Multipolar	chaotic aneuploid	triploid or polyploid
Embryo 21.B4	B	Chr1	25490	791	26028	276	1067	0.741331	0.258669	1	2.16126e-58	-	sig	Multipolar	chaotic aneuploid	triploid or polyploid
Embryo 21.B4	B	Chr2	25490	998	26028	127	1125	0.887111	0.112889	1	1.60764e-168	-	sig	Multipolar	chaotic aneuploid	triploid or polyploid
Embryo 21.B4	B	Chr3	25490	205	26028	239	444	0.461712	0.538288	0.0586114	0.951701	-	-	Multipolar	chaotic aneuploid	triploid or polyploid
Embryo 21.B4	B	Chr4	25490	903	26028	123	1026	0.880117	0.119883	1	1.52355e-147	-	sig	Multipolar	chaotic aneuploid	triploid or polyploid
Embryo 21.B4	B	Chr5	25490	557	26028	138	695	0.801439	0.198561	1	8.3303e-61	-	sig	Multipolar	chaotic aneuploid	triploid or polyploid
Embryo 21.B4	B	Chr6	25490	1	26028	0	1	1	0	1	0.5	-	-	Multipolar	chaotic aneuploid	triploid or polyploid
Embryo 21.B4	B	Chr7	25490	32	26028	138	170	0.188235	0.811765	3.44939e-17	1	sig	-	Multipolar	chaotic aneuploid	triploid or polyploid
Embryo 21.B4	B	Chr8	25490	80	26028	24	104	0.769231	0.230769	1	1.61075e-08	-	sig	Multipolar	chaotic aneuploid	triploid or polyploid
Embryo 21.B4	B	Chr9	25490	249	26028	163	412	0.604369	0.395631	0.999992	1.32356e-05	-	-	Multipolar	chaotic aneuploid	triploid or polyploid
Embryo 21.B4	B	Chr10	25490	500	26028	140	640	0.78125	0.21875	1	1.19118e-48	-	sig	Multipolar	chaotic aneuploid	triploid or polyploid
Embryo 21.B4	B	Chr11	25490	452	26028	156	608	0.743421	0.256579	1	1.22443e-34	-	sig	Multipolar	chaotic aneuploid	triploid or polyploid
Embryo 21.B4	B	Chr12	25490	282	26028	47	329	0.857143	0.142857	1	2.72731e-42	-	sig	Multipolar	chaotic aneuploid	triploid or polyploid
Embryo 21.B4	B	Chr13	25490	136	26028	18	154	0.883117	0.116883	1	6.63997e-24	-	sig	Multipolar	chaotic aneuploid	triploid or polyploid
Embryo 21.B4	B	Chr14	25490	21	26028	133	154	0.136364	0.863636	2.10766e-21	1	sig	-	Multipolar	chaotic aneuploid	triploid or polyploid
Embryo 21.B4	B	Chr15	25490	120	26028	173	293	0.409556	0.590444	0.00116316	0.999219	-	-	Multipolar	chaotic aneuploid	triploid or polyploid
Embryo 21.B4	B	Chr16	25490	118	26028	121	239	0.493724	0.506276	0.44855	0.602049	-	-	Multipolar	chaotic aneuploid	triploid or polyploid
Embryo 21.B4	B	Chr17	25490	155	26028	20	175	0.885714	0.114286	1	2.30876e-27	-	sig	Multipolar	chaotic aneuploid	triploid or polyploid
Embryo 21.B4	B	Chr18	25490	300	26028	50	350	0.857143	0.142857	1	6.93578e-45	-	sig	Multipolar	chaotic aneuploid	triploid or polyploid
Embryo 21.B4	B	Chr19	25490	29	26028	38	67	0.432836	0.567164	0.164216	0.889226	-	-	Multipolar	chaotic aneuploid	triploid or polyploid
Embryo 21.B4	B	Chr20	25490	334	26028	57	391	0.85422	0.14578	1	4.5642e-49	-	sig	Multipolar	chaotic aneuploid	triploid or polyploid
Embryo 21.B4	B	ChrUn	25490	44	26028	31	75	0.586667	0.413333	0.947329	0.082714	-	-	Multipolar	chaotic aneuploid	triploid or polyploid
Embryo 21.B4	B	ChrX	25490	98	26028	41	139	0.705036	0.294964	1	7.35308e-07	-	sig	Multipolar	chaotic aneuploid	triploid or polyploid
Embryo 21.B5	B	Chr1	25490	1	26028	1	2	0.5	0.5	0.75	0.75	-	-	Multipolar	chaotic aneuploid	triploid or polyploid
Embryo 21.B5	B	Chr2	25490	634	26028	112	746	0.849866	0.150134	1	1.42278e-89	-	sig	Multipolar	chaotic aneuploid	triploid or polyploid
Embryo 21.B5	B	Chr3	25490	383	26028	64	447	0.856823	0.143177	1	9.4639e-57	-	sig	Multipolar	chaotic aneuploid	triploid or polyploid
Embryo 21.B5	B	Chr4	25490	148	26028	697	845	0.175148	0.824852	3.56588e-86	1	sig	-	Multipolar	chaotic aneuploid	triploid or polyploid
Embryo 21.B5	B	Chr5	25490	94	26028	25	119	0.789916	0.210084	1	6.7085e-11	-	sig	Multipolar	chaotic aneuploid	triploid or polyploid
Embryo 21.B5	B	Chr6	25490	866	26028	158	1024	0.845703	0.154297	1	4.35587e-119	-	sig	Multipolar	chaotic aneuploid	triploid or polyploid
Embryo 21.B5	B	Chr7	25490	1190	26028	141	1331	0.894065	0.105935	1	1.88064e-207	-	sig	Multipolar	chaotic aneuploid	triploid or polyploid
Embryo 21.B5	B	Chr8	25490	333	26028	52	385	0.864935	0.135065	1	1.40155e-51	-	sig	Multipolar	chaotic aneuploid	triploid or polyploid
Embryo 21.B5	B	Chr9	25490	1	26028	0	1	1	0	1	0.5	-	-	Multipolar	chaotic aneuploid	triploid or polyploid
Embryo 21.B5	B	Chr10	25490	102	26028	20	122	0.836066	0.163934	1	9.82099e-15	-	sig	Multipolar	chaotic aneuploid	triploid or polyploid
Embryo 21.B5	B	Chr11	25490	292	26028	51	343	0.851312	0.148688	1	1.73257e-42	-	sig	Multipolar	chaotic aneuploid	triploid or polyploid
Embryo 21.B5	B	Chr12	25490	3	26028	12	15	0.2	0.8	0.0175781	0.996307	-	-	Multipolar	chaotic aneuploid	triploid or polyploid
Embryo 21.B5	B	Chr13	25490	519	26028	89	608	0.853618	0.146382	1	4.58164e-75	-	sig	Multipolar	chaotic aneuploid	triploid or polyploid
Embryo 21.B5	B	Chr14	25490	937	26028	134	1071	0.874883	0.125117	1	3.82217e-149	-	sig	Multipolar	chaotic aneuploid	triploid or polyploid
Embryo 21.B5	B	Chr15	25490	0	26028	1	1	0	1	0.5	1	-	-	Multipolar	chaotic aneuploid	triploid or polyploid
Embryo 21.B5	B	Chr16	25490	0	26028	1	1	0	1	0.5	1	-	-	Multipolar	chaotic aneuploid	triploid or polyploid
Embryo 21.B5	B	Chr17	25490	2	26028	0	2	1	0	1	0.25	-	-	Multipolar	chaotic aneuploid	triploid or polyploid
Embryo 21.B5	B	Chr18	25490	322	26028	59	381	0.845144	0.154856	1	2.9423e-45	-	sig	Multipolar	chaotic aneuploid	triploid or polyploid
Embryo 21.B5	B	Chr19	25490	252	26028	42	294	0.857143	0.142857	1	5.78277e-38	-	sig	Multipolar	chaotic aneuploid	triploid or polyploid
Embryo 21.B5	B	Chr20	25490	0	26028	1	1	0	1	0.5	1	-	-	Multipolar	chaotic aneuploid	triploid or polyploid
Embryo 21.B5	B	ChrUn	25490	46	26028	17	63	0.730159	0.269841	0.999941	0.000168355	-	-	Multipolar	chaotic aneuploid	triploid or polyploid
Embryo 21.B5	B	ChrX	25490	0	26028	4	4	0	1	0.0625	1	-	-	Multipolar	chaotic aneuploid	triploid or polyploid
Embryo 21.B6	B	Chr1	25490	7	26028	3	10	0.7	0.3	0.945312	0.171875	-	-	Multipolar	chaotic aneuploid	triploid or polyploid
Embryo 21.B6	B	Chr2	25490	39	26028	88	127	0.307087	0.692913	8.1669e-06	0.999997	sig	-	Multipolar	chaotic aneuploid	triploid or polyploid
Embryo 21.B6	B	Chr3	25490	1	26028	4	5	0.2	0.8	0.1875	0.96875	-	-	Multipolar	chaotic aneuploid	triploid or polyploid
Embryo 21.B6	B	Chr4	25490	3	26028	3	6	0.5	0.5	0.65625	0.65625	-	-	Multipolar	chaotic aneuploid	triploid or polyploid
Embryo 21.B6	B	Chr5	25490	1	26028	1	2	0.5	0.5	0.75	0.75	-	-	Multipolar	chaotic aneuploid	triploid or polyploid
Embryo 21.B6	B	Chr6	25490	4	26028	22	26	0.153846	0.846154	0.000266761	0.999956	-	-	Multipolar	chaotic aneuploid	triploid or polyploid
Embryo 21.B6	B	Chr7	25490	2	26028	1	3	0.666667	0.333333	0.875	0.5	-	-	Multipolar	chaotic aneuploid	triploid or polyploid
Embryo 21.B6	B	Chr8	25490	2	26028	4	6	0.333333	0.666667	0.34375	0.890625	-	-	Multipolar	chaotic aneuploid	triploid or polyploid
Embryo 21.B6	B	Chr9	25490	3	26028	0	3	1	0	1	0.125	-	-	Multipolar	chaotic aneuploid	triploid or polyploid
Embryo 21.B6	B	Chr10	25490	2	26028	3	5	0.4	0.6	0.5	0.8125	-	-	Multipolar	chaotic aneuploid	triploid or polyploid
Embryo 21.B6	B	Chr11	25490	85	26028	28	113	0.752212	0.247788	1	3.67183e-08	-	sig	Multipolar	chaotic aneuploid	triploid or polyploid
Embryo 21.B6	B	Chr12	25490	880	26028	144	1024	0.859375	0.140625	1	9.44594e-130	-	sig	Multipolar	chaotic aneuploid	triploid or polyploid
Embryo 21.B6	B	Chr13	25490	527	26028	103	630	0.836508	0.163492	1	8.83215e-70	-	sig	Multipolar	chaotic aneuploid	triploid or polyploid
Embryo 21.B6	B	Chr14	25490	0	26028	1	1	0	1	0.5	1	-	-	Multipolar	chaotic aneuploid	triploid or polyploid
Embryo 21.B6	B	Chr15	25490	846	26028	127	973	0.869476	0.130524	1	2.77157e-131	-	sig	Multipolar	chaotic aneuploid	triploid or polyploid
Embryo 21.B6	B	Chr16	25490	3	26028	1	4	0.75	0.25	0.9375	0.3125	-	-	Multipolar	chaotic aneuploid	triploid or polyploid
Embryo 21.B6	B	Chr17	25490	159	26028	23	182	0.873626	0.126374	1	1.65287e-26	-	sig	Multipolar	chaotic aneuploid	triploid or polyploid
Embryo 21.B6	B	Chr18	25490	76	26028	382	458	0.165939	0.834061	2.0402e-50	1	sig	-	Multipolar	chaotic aneuploid	triploid or polyploid
Embryo 21.B6	B	Chr19					0			1	1	-	-	Multipolar	chaotic aneuploid	triploid or polyploid
Embryo 21.B6	B	Chr20	25490	3	26028	2	5	0.6	0.4	0.8125	0.5	-	-	Multipolar	chaotic aneuploid	triploid or polyploid
Embryo 21.B6	B	ChrUn	25490	11	26028	5	16	0.6875	0.3125	0.961594	0.105057	-	-	Multipolar	chaotic aneuploid	triploid or polyploid
Embryo 21.B6	B	ChrX	25490	1	26028	0	1	1	0	1	0.5	-	-	Multipolar	chaotic aneuploid	triploid or polyploid
Embryo 21.B7	B	Chr1	25490	9	26028	12	21	0.428571	0.571429	0.331812	0.808345	-	-	Multipolar	chaotic aneuploid	triploid or polyploid
Embryo 21.B7	B	Chr2	25490	4	26028	2	6	0.666667	0.333333	0.890625	0.34375	-	-	Multipolar	chaotic aneuploid	triploid or polyploid
Embryo 21.B7	B	Chr3	25490	2	26028	7	9	0.222222	0.777778	0.0898438	0.980469	-	-	Multipolar	chaotic aneuploid	triploid or polyploid
Embryo 21.B7	B	Chr4	25490	4	26028	2	6	0.666667	0.333333	0.890625	0.34375	-	-	Multipolar	chaotic aneuploid	triploid or polyploid
Embryo 21.B7	B	Chr5	25490	395	26028	66	461	0.856833	0.143167	1	1.77236e-58	-	sig	Multipolar	chaotic aneuploid	triploid or polyploid
Embryo 21.B7	B	Chr6	25490	4	26028	5	9	0.444444	0.555556	0.5	0.746094	-	-	Multipolar	chaotic aneuploid	triploid or polyploid
Embryo 21.B7	B	Chr7	25490	2	26028	5	7	0.285714	0.714286	0.226562	0.9375	-	-	Multipolar	chaotic aneuploid	triploid or polyploid
Embryo 21.B7	B	Chr8	25490	1	26028	1	2	0.5	0.5	0.75	0.75	-	-	Multipolar	chaotic aneuploid	triploid or polyploid
Embryo 21.B7	B	Chr9	25490	2	26028	3	5	0.4	0.6	0.5	0.8125	-	-	Multipolar	chaotic aneuploid	triploid or polyploid
Embryo 21.B7	B	Chr10	25490	2	26028	4	6	0.333333	0.666667	0.34375	0.890625	-	-	Multipolar	chaotic aneuploid	triploid or polyploid
Embryo 21.B7	B	Chr11	25490	1	26028	2	3	0.333333	0.666667	0.5	0.875	-	-	Multipolar	chaotic aneuploid	triploid or polyploid
Embryo 21.B7	B	Chr12					0			1	1	-	-	Multipolar	chaotic aneuploid	triploid or polyploid
Embryo 21.B7	B	Chr13					0			1	1	-	-	Multipolar	chaotic aneuploid	triploid or polyploid
Embryo 21.B7	B	Chr14	25490	0	26028	1	1	0	1	0.5	1	-	-	Multipolar	chaotic aneuploid	triploid or polyploid
Embryo 21.B7	B	Chr15	25490	0	26028	1	1	0	1	0.5	1	-	-	Multipolar	chaotic aneuploid	triploid or polyploid
Embryo 21.B7	B	Chr16	25490	3	26028	0	3	1	0	1	0.125	-	-	Multipolar	chaotic aneuploid	triploid or polyploid
Embryo 21.B7	B	Chr17	25490	543	26028	74	617	0.880065	0.119935	1	2.03171e-89	-	sig	Multipolar	chaotic aneuploid	triploid or polyploid
Embryo 21.B7	B	Chr18	25490	2	26028	1	3	0.666667	0.333333	0.875	0.5	-	-	Multipolar	chaotic aneuploid	triploid or polyploid
Embryo 21.B7	B	Chr19	25490	64	26028	10	74	0.864865	0.135135	1	4.47871e-11	-	sig	Multipolar	chaotic aneuploid	triploid or polyploid
Embryo 21.B7	B	Chr20	25490	5	26028	39	44	0.113636	0.886364	7.02581e-08	1	sig	-	Multipolar	chaotic aneuploid	triploid or polyploid
Embryo 21.B7	B	ChrUn	25490	7	26028	0	7	1	0	1	0.0078125	-	-	Multipolar	chaotic aneuploid	triploid or polyploid
Embryo 21.B7	B	ChrX	25490	1	26028	5	6	0.166667	0.833333	0.109375	0.984375	-	-	Multipolar	chaotic aneuploid	triploid or polyploid
Embryo 21.F1	CCF	Chr1	25490	8	26028	4	12	0.666667	0.333333	0.927002	0.193848	-	-	Multipolar	chaotic aneuploid	triploid or polyploid
Embryo 21.F1	CCF	Chr1	25490	0	26028	1	1	0	1	0.5	1	-	-	Multipolar	chaotic aneuploid	triploid or polyploid
Embryo 21.F1	CCF	Chr2	25490	4	26028	5	9	0.444444	0.555556	0.5	0.746094	-	-	Multipolar	chaotic aneuploid	triploid or polyploid
Embryo 21.F1	CCF	Chr2	25490	0	26028	1	1	0	1	0.5	1	-	-	Multipolar	chaotic aneuploid	triploid or polyploid
Embryo 21.F1	CCF	Chr3	25490	12	26028	9	21	0.571429	0.428571	0.808345	0.331812	-	-	Multipolar	chaotic aneuploid	triploid or polyploid
Embryo 21.F1	CCF	Chr3					0			1	1	-	-	Multipolar	chaotic aneuploid	triploid or polyploid
Embryo 21.F1	CCF	Chr4	25490	1	26028	8	9	0.111111	0.888889	0.0195312	0.998047	-	-	Multipolar	chaotic aneuploid	triploid or polyploid
Embryo 21.F1	CCF	Chr4					0			1	1	-	-	Multipolar	chaotic aneuploid	triploid or polyploid
Embryo 21.F1	CCF	Chr5	25490	7	26028	0	7	1	0	1	0.0078125	-	-	Multipolar	chaotic aneuploid	triploid or polyploid
Embryo 21.F1	CCF	Chr5					0			1	1	-	-	Multipolar	chaotic aneuploid	triploid or polyploid
Embryo 21.F1	CCF	Chr6	25490	2	26028	3	5	0.4	0.6	0.5	0.8125	-	-	Multipolar	chaotic aneuploid	triploid or polyploid
Embryo 21.F1	CCF	Chr6	25490	1	26028	0	1	1	0	1	0.5	-	-	Multipolar	chaotic aneuploid	triploid or polyploid
Embryo 21.F1	CCF	Chr7	25490	5	26028	1	6	0.833333	0.166667	0.984375	0.109375	-	-	Multipolar	chaotic aneuploid	triploid or polyploid
Embryo 21.F1	CCF	Chr7					0			1	1	-	-	Multipolar	chaotic aneuploid	triploid or polyploid
Embryo 21.F1	CCF	Chr8	25490	0	26028	3	3	0	1	0.125	1	-	-	Multipolar	chaotic aneuploid	triploid or polyploid
Embryo 21.F1	CCF	Chr8					0			1	1	-	-	Multipolar	chaotic aneuploid	triploid or polyploid
Embryo 21.F1	CCF	Chr9	25490	2	26028	1	3	0.666667	0.333333	0.875	0.5	-	-	Multipolar	chaotic aneuploid	triploid or polyploid
Embryo 21.F1	CCF	Chr9					0			1	1	-	-	Multipolar	chaotic aneuploid	triploid or polyploid
Embryo 21.F1	CCF	Chr10	25490	42	26028	6	48	0.875	0.125	1	5.04374e-08	-	sig	Multipolar	chaotic aneuploid	triploid or polyploid
Embryo 21.F1	CCF	Chr10	25490	10	26028	2	12	0.833333	0.166667	0.996826	0.0192871	-	-	Multipolar	chaotic aneuploid	triploid or polyploid
Embryo 21.F1	CCF	Chr11	25490	1	26028	2	3	0.333333	0.666667	0.5	0.875	-	-	Multipolar	chaotic aneuploid	triploid or polyploid
Embryo 21.F1	CCF	Chr11					0			1	1	-	-	Multipolar	chaotic aneuploid	triploid or polyploid
Embryo 21.F1	CCF	Chr12	25490	4	26028	3	7	0.571429	0.428571	0.773438	0.5	-	-	Multipolar	chaotic aneuploid	triploid or polyploid
Embryo 21.F1	CCF	Chr12					0			1	1	-	-	Multipolar	chaotic aneuploid	triploid or polyploid
Embryo 21.F1	CCF	Chr13	25490	1	26028	3	4	0.25	0.75	0.3125	0.9375	-	-	Multipolar	chaotic aneuploid	triploid or polyploid
Embryo 21.F1	CCF	Chr13					0			1	1	-	-	Multipolar	chaotic aneuploid	triploid or polyploid
Embryo 21.F1	CCF	Chr14	25490	1	26028	2	3	0.333333	0.666667	0.5	0.875	-	-	Multipolar	chaotic aneuploid	triploid or polyploid
Embryo 21.F1	CCF	Chr14					0			1	1	-	-	Multipolar	chaotic aneuploid	triploid or polyploid
Embryo 21.F1	CCF	Chr15	25490	1	26028	1	2	0.5	0.5	0.75	0.75	-	-	Multipolar	chaotic aneuploid	triploid or polyploid
Embryo 21.F1	CCF	Chr15	25490	0	26028	1	1	0	1	0.5	1	-	-	Multipolar	chaotic aneuploid	triploid or polyploid
Embryo 21.F1	CCF	Chr16					0			1	1	-	-	Multipolar	chaotic aneuploid	triploid or polyploid
Embryo 21.F1	CCF	Chr16					0			1	1	-	-	Multipolar	chaotic aneuploid	triploid or polyploid
Embryo 21.F1	CCF	Chr17	25490	3	26028	2	5	0.6	0.4	0.8125	0.5	-	-	Multipolar	chaotic aneuploid	triploid or polyploid
Embryo 21.F1	CCF	Chr17					0			1	1	-	-	Multipolar	chaotic aneuploid	triploid or polyploid
Embryo 21.F1	CCF	Chr18	25490	3	26028	2	5	0.6	0.4	0.8125	0.5	-	-	Multipolar	chaotic aneuploid	triploid or polyploid
Embryo 21.F1	CCF	Chr18	25490	0	26028	1	1	0	1	0.5	1	-	-	Multipolar	chaotic aneuploid	triploid or polyploid
Embryo 21.F1	CCF	Chr19	25490	1	26028	1	2	0.5	0.5	0.75	0.75	-	-	Multipolar	chaotic aneuploid	triploid or polyploid
Embryo 21.F1	CCF	Chr19					0			1	1	-	-	Multipolar	chaotic aneuploid	triploid or polyploid
Embryo 21.F1	CCF	Chr20	25490	2	26028	2	4	0.5	0.5	0.6875	0.6875	-	-	Multipolar	chaotic aneuploid	triploid or polyploid
Embryo 21.F1	CCF	Chr20					0			1	1	-	-	Multipolar	chaotic aneuploid	triploid or polyploid
Embryo 21.F1	CCF	ChrUn					0			1	1	-	-	Multipolar	chaotic aneuploid	triploid or polyploid
Embryo 21.F1	CCF	ChrUn					0			1	1	-	-	Multipolar	chaotic aneuploid	triploid or polyploid
Embryo 21.F1	CCF	ChrX	25490	2	26028	0	2	1	0	1	0.25	-	-	Multipolar	chaotic aneuploid	triploid or polyploid
Embryo 21.F1	CCF	ChrX	25490	0	26028	1	1	0	1	0.5	1	-	-	Multipolar	chaotic aneuploid	triploid or polyploid
Embryo 21.F3	CCF	Chr1	25490	19	26028	17	36	0.527778	0.472222	0.69114	0.43397	-	-	Multipolar	chaotic aneuploid	triploid or polyploid
Embryo 21.F3	CCF	Chr1	25490	5	26028	7	12	0.416667	0.583333	0.387207	0.806152	-	-	Multipolar	chaotic aneuploid	triploid or polyploid
Embryo 21.F3	CCF	Chr2	25490	16	26028	21	37	0.432432	0.567568	0.255688	0.837996	-	-	Multipolar	chaotic aneuploid	triploid or polyploid
Embryo 21.F3	CCF	Chr2	25490	8	26028	12	20	0.4	0.6	0.251722	0.868412	-	-	Multipolar	chaotic aneuploid	triploid or polyploid
Embryo 21.F3	CCF	Chr3	25490	46	26028	173	219	0.210046	0.789954	8.21503e-19	1	sig	-	Multipolar	chaotic aneuploid	triploid or polyploid
Embryo 21.F3	CCF	Chr3	25490	31	26028	117	148	0.209459	0.790541	2.96213e-13	1	sig	-	Multipolar	chaotic aneuploid	triploid or polyploid
Embryo 21.F3	CCF	Chr4	25490	13	26028	7	20	0.65	0.35	0.942341	0.131588	-	-	Multipolar	chaotic aneuploid	triploid or polyploid
Embryo 21.F3	CCF	Chr4	25490	8	26028	5	13	0.615385	0.384615	0.866577	0.290527	-	-	Multipolar	chaotic aneuploid	triploid or polyploid
Embryo 21.F3	CCF	Chr5	25490	14	26028	11	25	0.56	0.44	0.787822	0.345019	-	-	Multipolar	chaotic aneuploid	triploid or polyploid
Embryo 21.F3	CCF	Chr5	25490	9	26028	4	13	0.692308	0.307692	0.953857	0.133423	-	-	Multipolar	chaotic aneuploid	triploid or polyploid
Embryo 21.F3	CCF	Chr6	25490	7	26028	10	17	0.411765	0.588235	0.314529	0.833847	-	-	Multipolar	chaotic aneuploid	triploid or polyploid
Embryo 21.F3	CCF	Chr6	25490	5	26028	4	9	0.555556	0.444444	0.746094	0.5	-	-	Multipolar	chaotic aneuploid	triploid or polyploid
Embryo 21.F3	CCF	Chr7	25490	27	26028	21	48	0.5625	0.4375	0.843837	0.23544	-	-	Multipolar	chaotic aneuploid	triploid or polyploid
Embryo 21.F3	CCF	Chr7	25490	14	26028	10	24	0.583333	0.416667	0.846272	0.270628	-	-	Multipolar	chaotic aneuploid	triploid or polyploid
Embryo 21.F3	CCF	Chr8	25490	12	26028	13	25	0.48	0.52	0.5	0.654981	-	-	Multipolar	chaotic aneuploid	triploid or polyploid
Embryo 21.F3	CCF	Chr8	25490	14	26028	5	19	0.736842	0.263158	0.990395	0.0317841	-	-	Multipolar	chaotic aneuploid	triploid or polyploid
Embryo 21.F3	CCF	Chr9	25490	14	26028	10	24	0.583333	0.416667	0.846272	0.270628	-	-	Multipolar	chaotic aneuploid	triploid or polyploid
Embryo 21.F3	CCF	Chr9	25490	6	26028	4	10	0.6	0.4	0.828125	0.376953	-	-	Multipolar	chaotic aneuploid	triploid or polyploid
Embryo 21.F3	CCF	Chr10	25490	8	26028	12	20	0.4	0.6	0.251722	0.868412	-	-	Multipolar	chaotic aneuploid	triploid or polyploid
Embryo 21.F3	CCF	Chr10	25490	1	26028	5	6	0.166667	0.833333	0.109375	0.984375	-	-	Multipolar	chaotic aneuploid	triploid or polyploid
Embryo 21.F3	CCF	Chr11	25490	10	26028	22	32	0.3125	0.6875	0.0250512	0.989969	-	-	Multipolar	chaotic aneuploid	triploid or polyploid
Embryo 21.F3	CCF	Chr11	25490	6	26028	4	10	0.6	0.4	0.828125	0.376953	-	-	Multipolar	chaotic aneuploid	triploid or polyploid
Embryo 21.F3	CCF	Chr12	25490	12	26028	10	22	0.545455	0.454545	0.738266	0.415906	-	-	Multipolar	chaotic aneuploid	triploid or polyploid
Embryo 21.F3	CCF	Chr12	25490	3	26028	2	5	0.6	0.4	0.8125	0.5	-	-	Multipolar	chaotic aneuploid	triploid or polyploid
Embryo 21.F3	CCF	Chr13	25490	15	26028	9	24	0.625	0.375	0.924205	0.153728	-	-	Multipolar	chaotic aneuploid	triploid or polyploid
Embryo 21.F3	CCF	Chr13	25490	7	26028	7	14	0.5	0.5	0.604736	0.604736	-	-	Multipolar	chaotic aneuploid	triploid or polyploid
Embryo 21.F3	CCF	Chr14	25490	10	26028	14	24	0.416667	0.583333	0.270628	0.846272	-	-	Multipolar	chaotic aneuploid	triploid or polyploid
Embryo 21.F3	CCF	Chr14	25490	7	26028	3	10	0.7	0.3	0.945312	0.171875	-	-	Multipolar	chaotic aneuploid	triploid or polyploid
Embryo 21.F3	CCF	Chr15	25490	7	26028	7	14	0.5	0.5	0.604736	0.604736	-	-	Multipolar	chaotic aneuploid	triploid or polyploid
Embryo 21.F3	CCF	Chr15	25490	6	26028	3	9	0.666667	0.333333	0.910156	0.253906	-	-	Multipolar	chaotic aneuploid	triploid or polyploid
Embryo 21.F3	CCF	Chr16	25490	15	26028	9	24	0.625	0.375	0.924205	0.153728	-	-	Multipolar	chaotic aneuploid	triploid or polyploid
Embryo 21.F3	CCF	Chr16	25490	4	26028	6	10	0.4	0.6	0.376953	0.828125	-	-	Multipolar	chaotic aneuploid	triploid or polyploid
Embryo 21.F3	CCF	Chr17	25490	9	26028	5	14	0.642857	0.357143	0.910217	0.211975	-	-	Multipolar	chaotic aneuploid	triploid or polyploid
Embryo 21.F3	CCF	Chr17	25490	4	26028	6	10	0.4	0.6	0.376953	0.828125	-	-	Multipolar	chaotic aneuploid	triploid or polyploid
Embryo 21.F3	CCF	Chr18	25490	13	26028	12	25	0.52	0.48	0.654981	0.5	-	-	Multipolar	chaotic aneuploid	triploid or polyploid
Embryo 21.F3	CCF	Chr18	25490	8	26028	7	15	0.533333	0.466667	0.696381	0.5	-	-	Multipolar	chaotic aneuploid	triploid or polyploid
Embryo 21.F3	CCF	Chr19	25490	5	26028	11	16	0.3125	0.6875	0.105057	0.961594	-	-	Multipolar	chaotic aneuploid	triploid or polyploid
Embryo 21.F3	CCF	Chr19	25490	2	26028	7	9	0.222222	0.777778	0.0898438	0.980469	-	-	Multipolar	chaotic aneuploid	triploid or polyploid
Embryo 21.F3	CCF	Chr20	25490	12	26028	13	25	0.48	0.52	0.5	0.654981	-	-	Multipolar	chaotic aneuploid	triploid or polyploid
Embryo 21.F3	CCF	Chr20	25490	5	26028	2	7	0.714286	0.285714	0.9375	0.226562	-	-	Multipolar	chaotic aneuploid	triploid or polyploid
Embryo 21.F3	CCF	ChrUn	25490	2	26028	3	5	0.4	0.6	0.5	0.8125	-	-	Multipolar	chaotic aneuploid	triploid or polyploid
Embryo 21.F3	CCF	ChrUn	25490	0	26028	1	1	0	1	0.5	1	-	-	Multipolar	chaotic aneuploid	triploid or polyploid
Embryo 21.F3	CCF	ChrX	25490	14	26028	11	25	0.56	0.44	0.787822	0.345019	-	-	Multipolar	chaotic aneuploid	triploid or polyploid
Embryo 21.F3	CCF	ChrX	25490	10	26028	6	16	0.625	0.375	0.894943	0.227249	-	-	Multipolar	chaotic aneuploid	triploid or polyploid
Embryo 22.B1	B	Chr1	25490	0	26028	2	2	0	1	0.25	1	-	-	Multipolar	chaotic aneuploid	triploid or polyploid
Embryo 22.B1	B	Chr2	25490	82	26028	369	451	0.181818	0.818182	7.92573e-45	1	sig	-	Multipolar	chaotic aneuploid	triploid or polyploid
Embryo 22.B1	B	Chr3	25490	61	26028	310	371	0.16442	0.83558	1.47675e-41	1	sig	-	Multipolar	chaotic aneuploid	triploid or polyploid
Embryo 22.B1	B	Chr4	25490	4	26028	5	9	0.444444	0.555556	0.5	0.746094	-	-	Multipolar	chaotic aneuploid	triploid or polyploid
Embryo 22.B1	B	Chr5	25490	511	26028	85	596	0.857383	0.142617	1	2.38227e-75	-	sig	Multipolar	chaotic aneuploid	triploid or polyploid
Embryo 22.B1	B	Chr6	25490	2	26028	1	3	0.666667	0.333333	0.875	0.5	-	-	Multipolar	chaotic aneuploid	triploid or polyploid
Embryo 22.B1	B	Chr7	25490	1	26028	3	4	0.25	0.75	0.3125	0.9375	-	-	Multipolar	chaotic aneuploid	triploid or polyploid
Embryo 22.B1	B	Chr8	25490	3	26028	2	5	0.6	0.4	0.8125	0.5	-	-	Multipolar	chaotic aneuploid	triploid or polyploid
Embryo 22.B1	B	Chr9	25490	2	26028	2	4	0.5	0.5	0.6875	0.6875	-	-	Multipolar	chaotic aneuploid	triploid or polyploid
Embryo 22.B1	B	Chr10	25490	36	26028	137	173	0.208092	0.791908	2.22848e-15	1	sig	-	Multipolar	chaotic aneuploid	triploid or polyploid
Embryo 22.B1	B	Chr11	25490	0	26028	1	1	0	1	0.5	1	-	-	Multipolar	chaotic aneuploid	triploid or polyploid
Embryo 22.B1	B	Chr12	25490	44	26028	227	271	0.162362	0.837638	3.4279e-31	1	sig	-	Multipolar	chaotic aneuploid	triploid or polyploid
Embryo 22.B1	B	Chr13	25490	1	26028	2	3	0.333333	0.666667	0.5	0.875	-	-	Multipolar	chaotic aneuploid	triploid or polyploid
Embryo 22.B1	B	Chr14	25490	1	26028	0	1	1	0	1	0.5	-	-	Multipolar	chaotic aneuploid	triploid or polyploid
Embryo 22.B1	B	Chr15	25490	0	26028	2	2	0	1	0.25	1	-	-	Multipolar	chaotic aneuploid	triploid or polyploid
Embryo 22.B1	B	Chr16					0			1	1	-	-	Multipolar	chaotic aneuploid	triploid or polyploid
Embryo 22.B1	B	Chr17	25490	309	26028	54	363	0.85124	0.14876	1	7.54208e-45	-	sig	Multipolar	chaotic aneuploid	triploid or polyploid
Embryo 22.B1	B	Chr18	25490	7	26028	0	7	1	0	1	0.0078125	-	-	Multipolar	chaotic aneuploid	triploid or polyploid
Embryo 22.B1	B	Chr19	25490	134	26028	25	159	0.842767	0.157233	1	1.59714e-19	-	sig	Multipolar	chaotic aneuploid	triploid or polyploid
Embryo 22.B1	B	Chr20	25490	1	26028	0	1	1	0	1	0.5	-	-	Multipolar	chaotic aneuploid	triploid or polyploid
Embryo 22.B1	B	ChrUn	25490	16	26028	12	28	0.571429	0.428571	0.827536	0.285794	-	-	Multipolar	chaotic aneuploid	triploid or polyploid
Embryo 22.B1	B	ChrX	25490	490	26028	58	548	0.894161	0.105839	1	1.62072e-86	-	sig	Multipolar	chaotic aneuploid	triploid or polyploid
Embryo 22.B10	B	Chr1	25490	2	26028	0	2	1	0	1	0.25	-	-	Multipolar	chaotic aneuploid	triploid or polyploid
Embryo 22.B10	B	Chr2	25490	68	26028	305	373	0.182306	0.817694	3.00244e-37	1	sig	-	Multipolar	chaotic aneuploid	triploid or polyploid
Embryo 22.B10	B	Chr3	25490	67	26028	300	367	0.182561	0.817439	1.29076e-36	1	sig	-	Multipolar	chaotic aneuploid	triploid or polyploid
Embryo 22.B10	B	Chr4	25490	2	26028	0	2	1	0	1	0.25	-	-	Multipolar	chaotic aneuploid	triploid or polyploid
Embryo 22.B10	B	Chr5	25490	548	26028	110	658	0.832827	0.167173	1	4.23028e-71	-	sig	Multipolar	chaotic aneuploid	triploid or polyploid
Embryo 22.B10	B	Chr6	25490	1	26028	0	1	1	0	1	0.5	-	-	Multipolar	chaotic aneuploid	triploid or polyploid
Embryo 22.B10	B	Chr7	25490	1	26028	4	5	0.2	0.8	0.1875	0.96875	-	-	Multipolar	chaotic aneuploid	triploid or polyploid
Embryo 22.B10	B	Chr8					0			1	1	-	-	Multipolar	chaotic aneuploid	triploid or polyploid
Embryo 22.B10	B	Chr9					0			1	1	-	-	Multipolar	chaotic aneuploid	triploid or polyploid
Embryo 22.B10	B	Chr10	25490	46	26028	160	206	0.223301	0.776699	2.9258e-16	1	sig	-	Multipolar	chaotic aneuploid	triploid or polyploid
Embryo 22.B10	B	Chr11	25490	0	26028	1	1	0	1	0.5	1	-	-	Multipolar	chaotic aneuploid	triploid or polyploid
Embryo 22.B10	B	Chr12	25490	41	26028	233	274	0.149635	0.850365	4.52153e-34	1	sig	-	Multipolar	chaotic aneuploid	triploid or polyploid
Embryo 22.B10	B	Chr13	25490	2	26028	0	2	1	0	1	0.25	-	-	Multipolar	chaotic aneuploid	triploid or polyploid
Embryo 22.B10	B	Chr14					0			1	1	-	-	Multipolar	chaotic aneuploid	triploid or polyploid
Embryo 22.B10	B	Chr15					0			1	1	-	-	Multipolar	chaotic aneuploid	triploid or polyploid
Embryo 22.B10	B	Chr16					0			1	1	-	-	Multipolar	chaotic aneuploid	triploid or polyploid
Embryo 22.B10	B	Chr17	25490	326	26028	57	383	0.851175	0.148825	1	3.28807e-47	-	sig	Multipolar	chaotic aneuploid	triploid or polyploid
Embryo 22.B10	B	Chr18	25490	9	26028	2	11	0.818182	0.181818	0.994141	0.0327148	-	-	Multipolar	chaotic aneuploid	triploid or polyploid
Embryo 22.B10	B	Chr19	25490	143	26028	27	170	0.841176	0.158824	1	1.41886e-20	-	sig	Multipolar	chaotic aneuploid	triploid or polyploid
Embryo 22.B10	B	Chr20	25490	1	26028	1	2	0.5	0.5	0.75	0.75	-	-	Multipolar	chaotic aneuploid	triploid or polyploid
Embryo 22.B10	B	ChrUn	25490	19	26028	14	33	0.575758	0.424242	0.851897	0.243425	-	-	Multipolar	chaotic aneuploid	triploid or polyploid
Embryo 22.B10	B	ChrX	25490	479	26028	45	524	0.914122	0.0858779	1	5.62644e-93	-	sig	Multipolar	chaotic aneuploid	triploid or polyploid
Embryo 22.B11	B	Chr1	25490	3	26028	1	4	0.75	0.25	0.9375	0.3125	-	-	Multipolar	chaotic aneuploid	triploid or polyploid
Embryo 22.B11	B	Chr2	25490	74	26028	365	439	0.168565	0.831435	1.35906e-47	1	sig	-	Multipolar	chaotic aneuploid	triploid or polyploid
Embryo 22.B11	B	Chr3	25490	1	26028	1	2	0.5	0.5	0.75	0.75	-	-	Multipolar	chaotic aneuploid	triploid or polyploid
Embryo 22.B11	B	Chr4	25490	2	26028	2	4	0.5	0.5	0.6875	0.6875	-	-	Multipolar	chaotic aneuploid	triploid or polyploid
Embryo 22.B11	B	Chr5	25490	425	26028	80	505	0.841584	0.158416	1	4.03503e-58	-	sig	Multipolar	chaotic aneuploid	triploid or polyploid
Embryo 22.B11	B	Chr6	25490	2	26028	1	3	0.666667	0.333333	0.875	0.5	-	-	Multipolar	chaotic aneuploid	triploid or polyploid
Embryo 22.B11	B	Chr7	25490	2	26028	2	4	0.5	0.5	0.6875	0.6875	-	-	Multipolar	chaotic aneuploid	triploid or polyploid
Embryo 22.B11	B	Chr8	25490	1	26028	1	2	0.5	0.5	0.75	0.75	-	-	Multipolar	chaotic aneuploid	triploid or polyploid
Embryo 22.B11	B	Chr9	25490	1	26028	1	2	0.5	0.5	0.75	0.75	-	-	Multipolar	chaotic aneuploid	triploid or polyploid
Embryo 22.B11	B	Chr10	25490	47	26028	255	302	0.155629	0.844371	4.81999e-36	1	sig	-	Multipolar	chaotic aneuploid	triploid or polyploid
Embryo 22.B11	B	Chr11	25490	1	26028	4	5	0.2	0.8	0.1875	0.96875	-	-	Multipolar	chaotic aneuploid	triploid or polyploid
Embryo 22.B11	B	Chr12	25490	44	26028	228	272	0.161765	0.838235	2.04261e-31	1	sig	-	Multipolar	chaotic aneuploid	triploid or polyploid
Embryo 22.B11	B	Chr13	25490	1	26028	0	1	1	0	1	0.5	-	-	Multipolar	chaotic aneuploid	triploid or polyploid
Embryo 22.B11	B	Chr14	25490	0	26028	1	1	0	1	0.5	1	-	-	Multipolar	chaotic aneuploid	triploid or polyploid
Embryo 22.B11	B	Chr15	25490	4	26028	4	8	0.5	0.5	0.636719	0.636719	-	-	Multipolar	chaotic aneuploid	triploid or polyploid
Embryo 22.B11	B	Chr16	25490	1	26028	1	2	0.5	0.5	0.75	0.75	-	-	Multipolar	chaotic aneuploid	triploid or polyploid
Embryo 22.B11	B	Chr17	25490	503	26028	78	581	0.865749	0.134251	1	2.36772e-77	-	sig	Multipolar	chaotic aneuploid	triploid or polyploid
Embryo 22.B11	B	Chr18	25490	31	26028	1	32	0.96875	0.03125	1	7.68341e-09	-	sig	Multipolar	chaotic aneuploid	triploid or polyploid
Embryo 22.B11	B	Chr19					0			1	1	-	-	Multipolar	chaotic aneuploid	triploid or polyploid
Embryo 22.B11	B	Chr20	25490	3	26028	0	3	1	0	1	0.125	-	-	Multipolar	chaotic aneuploid	triploid or polyploid
Embryo 22.B11	B	ChrUn	25490	12	26028	5	17	0.705882	0.294118	0.975479	0.0717316	-	-	Multipolar	chaotic aneuploid	triploid or polyploid
Embryo 22.B11	B	ChrX	25490	9	26028	3	12	0.75	0.25	0.980713	0.072998	-	-	Multipolar	chaotic aneuploid	triploid or polyploid
Embryo 22.B12	B	Chr1	25490	4	26028	2	6	0.666667	0.333333	0.890625	0.34375	-	-	Multipolar	chaotic aneuploid	triploid or polyploid
Embryo 22.B12	B	Chr2	25490	59	26028	206	265	0.222642	0.777358	1.45904e-20	1	sig	-	Multipolar	chaotic aneuploid	triploid or polyploid
Embryo 22.B12	B	Chr3	25490	56	26028	219	275	0.203636	0.796364	3.01653e-24	1	sig	-	Multipolar	chaotic aneuploid	triploid or polyploid
Embryo 22.B12	B	Chr4	25490	5	26028	4	9	0.555556	0.444444	0.746094	0.5	-	-	Multipolar	chaotic aneuploid	triploid or polyploid
Embryo 22.B12	B	Chr5	25490	235	26028	44	279	0.842294	0.157706	1	5.34506e-33	-	sig	Multipolar	chaotic aneuploid	triploid or polyploid
Embryo 22.B12	B	Chr6	25490	4	26028	2	6	0.666667	0.333333	0.890625	0.34375	-	-	Multipolar	chaotic aneuploid	triploid or polyploid
Embryo 22.B12	B	Chr7	25490	1	26028	3	4	0.25	0.75	0.3125	0.9375	-	-	Multipolar	chaotic aneuploid	triploid or polyploid
Embryo 22.B12	B	Chr8	25490	3	26028	1	4	0.75	0.25	0.9375	0.3125	-	-	Multipolar	chaotic aneuploid	triploid or polyploid
Embryo 22.B12	B	Chr9	25490	2	26028	0	2	1	0	1	0.25	-	-	Multipolar	chaotic aneuploid	triploid or polyploid
Embryo 22.B12	B	Chr10	25490	11	26028	50	61	0.180328	0.819672	2.29442e-07	1	sig	-	Multipolar	chaotic aneuploid	triploid or polyploid
Embryo 22.B12	B	Chr11	25490	0	26028	3	3	0	1	0.125	1	-	-	Multipolar	chaotic aneuploid	triploid or polyploid
Embryo 22.B12	B	Chr12	25490	13	26028	42	55	0.236364	0.763636	5.68053e-05	0.999983	-	-	Multipolar	chaotic aneuploid	triploid or polyploid
Embryo 22.B12	B	Chr13	25490	3	26028	5	8	0.375	0.625	0.363281	0.855469	-	-	Multipolar	chaotic aneuploid	triploid or polyploid
Embryo 22.B12	B	Chr14	25490	2	26028	3	5	0.4	0.6	0.5	0.8125	-	-	Multipolar	chaotic aneuploid	triploid or polyploid
Embryo 22.B12	B	Chr15	25490	3	26028	1	4	0.75	0.25	0.9375	0.3125	-	-	Multipolar	chaotic aneuploid	triploid or polyploid
Embryo 22.B12	B	Chr16	25490	1	26028	0	1	1	0	1	0.5	-	-	Multipolar	chaotic aneuploid	triploid or polyploid
Embryo 22.B12	B	Chr17	25490	104	26028	24	128	0.8125	0.1875	1	2.28915e-13	-	sig	Multipolar	chaotic aneuploid	triploid or polyploid
Embryo 22.B12	B	Chr18	25490	0	26028	3	3	0	1	0.125	1	-	-	Multipolar	chaotic aneuploid	triploid or polyploid
Embryo 22.B12	B	Chr19	25490	75	26028	20	95	0.789474	0.210526	1	5.81983e-09	-	sig	Multipolar	chaotic aneuploid	triploid or polyploid
Embryo 22.B12	B	Chr20	25490	14	26028	3	17	0.823529	0.176471	0.998825	0.00636292	-	-	Multipolar	chaotic aneuploid	triploid or polyploid
Embryo 22.B12	B	ChrUn	25490	14	26028	9	23	0.608696	0.391304	0.89498	0.202436	-	-	Multipolar	chaotic aneuploid	triploid or polyploid
Embryo 22.B12	B	ChrX	25490	348	26028	38	386	0.901554	0.0984456	1	4.03836e-64	-	sig	Multipolar	chaotic aneuploid	triploid or polyploid
Embryo 22.B13	B	Chr1	25490	2	26028	2	4	0.5	0.5	0.6875	0.6875	-	-	Multipolar	chaotic aneuploid	triploid or polyploid
Embryo 22.B13	B	Chr2	25490	32	26028	142	174	0.183908	0.816092	4.85936e-18	1	sig	-	Multipolar	chaotic aneuploid	triploid or polyploid
Embryo 22.B13	B	Chr3	25490	34	26028	210	244	0.139344	0.860656	1.89629e-32	1	sig	-	Multipolar	chaotic aneuploid	triploid or polyploid
Embryo 22.B13	B	Chr4	25490	1	26028	1	2	0.5	0.5	0.75	0.75	-	-	Multipolar	chaotic aneuploid	triploid or polyploid
Embryo 22.B13	B	Chr5	25490	488	26028	81	569	0.857645	0.142355	1	3.932e-72	-	sig	Multipolar	chaotic aneuploid	triploid or polyploid
Embryo 22.B13	B	Chr6	25490	3	26028	1	4	0.75	0.25	0.9375	0.3125	-	-	Multipolar	chaotic aneuploid	triploid or polyploid
Embryo 22.B13	B	Chr7	25490	1	26028	5	6	0.166667	0.833333	0.109375	0.984375	-	-	Multipolar	chaotic aneuploid	triploid or polyploid
Embryo 22.B13	B	Chr8	25490	2	26028	1	3	0.666667	0.333333	0.875	0.5	-	-	Multipolar	chaotic aneuploid	triploid or polyploid
Embryo 22.B13	B	Chr9	25490	3	26028	0	3	1	0	1	0.125	-	-	Multipolar	chaotic aneuploid	triploid or polyploid
Embryo 22.B13	B	Chr10	25490	36	26028	188	224	0.160714	0.839286	2.55291e-26	1	sig	-	Multipolar	chaotic aneuploid	triploid or polyploid
Embryo 22.B13	B	Chr11	25490	1	26028	1	2	0.5	0.5	0.75	0.75	-	-	Multipolar	chaotic aneuploid	triploid or polyploid
Embryo 22.B13	B	Chr12	25490	48	26028	205	253	0.189723	0.810277	1.37777e-24	1	sig	-	Multipolar	chaotic aneuploid	triploid or polyploid
Embryo 22.B13	B	Chr13	25490	0	26028	1	1	0	1	0.5	1	-	-	Multipolar	chaotic aneuploid	triploid or polyploid
Embryo 22.B13	B	Chr14	25490	0	26028	2	2	0	1	0.25	1	-	-	Multipolar	chaotic aneuploid	triploid or polyploid
Embryo 22.B13	B	Chr15	25490	2	26028	1	3	0.666667	0.333333	0.875	0.5	-	-	Multipolar	chaotic aneuploid	triploid or polyploid
Embryo 22.B13	B	Chr16					0			1	1	-	-	Multipolar	chaotic aneuploid	triploid or polyploid
Embryo 22.B13	B	Chr17	25490	310	26028	52	362	0.856354	0.143646	1	3.80442e-46	-	sig	Multipolar	chaotic aneuploid	triploid or polyploid
Embryo 22.B13	B	Chr18	25490	8	26028	0	8	1	0	1	0.00390625	-	-	Multipolar	chaotic aneuploid	triploid or polyploid
Embryo 22.B13	B	Chr19	25490	153	26028	25	178	0.859551	0.140449	1	6.23234e-24	-	sig	Multipolar	chaotic aneuploid	triploid or polyploid
Embryo 22.B13	B	Chr20	25490	1	26028	0	1	1	0	1	0.5	-	-	Multipolar	chaotic aneuploid	triploid or polyploid
Embryo 22.B13	B	ChrUn	25490	23	26028	5	28	0.821429	0.178571	0.99991	0.000456117	-	-	Multipolar	chaotic aneuploid	triploid or polyploid
Embryo 22.B13	B	ChrX	25490	458	26028	53	511	0.896282	0.103718	1	8.48659e-82	-	sig	Multipolar	chaotic aneuploid	triploid or polyploid
Embryo 22.B14	B	Chr1	25490	471	26028	84	555	0.848649	0.151351	1	1.37228e-66	-	sig	Multipolar	chaotic aneuploid	triploid or polyploid
Embryo 22.B14	B	Chr2	25490	227	26028	33	260	0.873077	0.126923	1	4.30456e-37	-	sig	Multipolar	chaotic aneuploid	triploid or polyploid
Embryo 22.B14	B	Chr3	25490	220	26028	32	252	0.873016	0.126984	1	5.4923e-36	-	sig	Multipolar	chaotic aneuploid	triploid or polyploid
Embryo 22.B14	B	Chr4	25490	383	26028	129	512	0.748047	0.251953	1	1.48823e-30	-	sig	Multipolar	chaotic aneuploid	triploid or polyploid
Embryo 22.B14	B	Chr5	25490	183	26028	120	303	0.60396	0.39604	0.999888	0.000176167	-	-	Multipolar	chaotic aneuploid	triploid or polyploid
Embryo 22.B14	B	Chr6	25490	1	26028	4	5	0.2	0.8	0.1875	0.96875	-	-	Multipolar	chaotic aneuploid	triploid or polyploid
Embryo 22.B14	B	Chr7	25490	19	26028	79	98	0.193878	0.806122	3.56369e-10	1	sig	-	Multipolar	chaotic aneuploid	triploid or polyploid
Embryo 22.B14	B	Chr8	25490	339	26028	116	455	0.745055	0.254945	1	1.05652e-26	-	sig	Multipolar	chaotic aneuploid	triploid or polyploid
Embryo 22.B14	B	Chr9	25490	1	26028	0	1	1	0	1	0.5	-	-	Multipolar	chaotic aneuploid	triploid or polyploid
Embryo 22.B14	B	Chr10	25490	101	26028	23	124	0.814516	0.185484	1	3.73631e-13	-	sig	Multipolar	chaotic aneuploid	triploid or polyploid
Embryo 22.B14	B	Chr11	25490	306	26028	125	431	0.709977	0.290023	1	6.64686e-19	-	sig	Multipolar	chaotic aneuploid	triploid or polyploid
Embryo 22.B14	B	Chr12	25490	148	26028	35	183	0.808743	0.191257	1	4.87222e-18	-	sig	Multipolar	chaotic aneuploid	triploid or polyploid
Embryo 22.B14	B	Chr13	25490	132	26028	85	217	0.608295	0.391705	0.999464	0.000864118	-	-	Multipolar	chaotic aneuploid	triploid or polyploid
Embryo 22.B14	B	Chr14	25490	15	26028	64	79	0.189873	0.810127	1.15172e-08	1	sig	-	Multipolar	chaotic aneuploid	triploid or polyploid
Embryo 22.B14	B	Chr15	25490	116	26028	18	134	0.865672	0.134328	1	4.96823e-19	-	sig	Multipolar	chaotic aneuploid	triploid or polyploid
Embryo 22.B14	B	Chr16					0			1	1	-	-	Multipolar	chaotic aneuploid	triploid or polyploid
Embryo 22.B14	B	Chr17	25490	102	26028	17	119	0.857143	0.142857	1	2.93006e-16	-	sig	Multipolar	chaotic aneuploid	triploid or polyploid
Embryo 22.B14	B	Chr18	25490	113	26028	16	129	0.875969	0.124031	1	1.81806e-19	-	sig	Multipolar	chaotic aneuploid	triploid or polyploid
Embryo 22.B14	B	Chr19	25490	38	26028	12	50	0.76	0.24	0.999955	0.000152932	-	-	Multipolar	chaotic aneuploid	triploid or polyploid
Embryo 22.B14	B	Chr20	25490	101	26028	55	156	0.647436	0.352564	0.999925	0.000143554	-	-	Multipolar	chaotic aneuploid	triploid or polyploid
Embryo 22.B14	B	ChrUn	25490	18	26028	10	28	0.642857	0.357143	0.956421	0.0924667	-	-	Multipolar	chaotic aneuploid	triploid or polyploid
Embryo 22.B14	B	ChrX	25490	11	26028	48	59	0.186441	0.813559	6.20814e-07	1	sig	-	Multipolar	chaotic aneuploid	triploid or polyploid
Embryo 22.B2	B	Chr1	25490	2	26028	2	4	0.5	0.5	0.6875	0.6875	-	-	Multipolar	chaotic aneuploid	triploid or polyploid
Embryo 22.B2	B	Chr2	25490	222	26028	41	263	0.844106	0.155894	1	1.51704e-31	-	sig	Multipolar	chaotic aneuploid	triploid or polyploid
Embryo 22.B2	B	Chr3	25490	225	26028	54	279	0.806452	0.193548	1	2.78113e-26	-	sig	Multipolar	chaotic aneuploid	triploid or polyploid
Embryo 22.B2	B	Chr4	25490	3	26028	1	4	0.75	0.25	0.9375	0.3125	-	-	Multipolar	chaotic aneuploid	triploid or polyploid
Embryo 22.B2	B	Chr5	25490	2	26028	1	3	0.666667	0.333333	0.875	0.5	-	-	Multipolar	chaotic aneuploid	triploid or polyploid
Embryo 22.B2	B	Chr6	25490	338	26028	201	539	0.627087	0.372913	1	1.94476e-09	-	sig	Multipolar	chaotic aneuploid	triploid or polyploid
Embryo 22.B2	B	Chr7	25490	344	26028	53	397	0.866499	0.133501	1	1.2289e-53	-	sig	Multipolar	chaotic aneuploid	triploid or polyploid
Embryo 22.B2	B	Chr8	25490	0	26028	1	1	0	1	0.5	1	-	-	Multipolar	chaotic aneuploid	triploid or polyploid
Embryo 22.B2	B	Chr9	25490	352	26028	224	576	0.611111	0.388889	1	5.40032e-08	-	sig	Multipolar	chaotic aneuploid	triploid or polyploid
Embryo 22.B2	B	Chr10	25490	113	26028	16	129	0.875969	0.124031	1	1.81806e-19	-	sig	Multipolar	chaotic aneuploid	triploid or polyploid
Embryo 22.B2	B	Chr11	25490	1	26028	0	1	1	0	1	0.5	-	-	Multipolar	chaotic aneuploid	triploid or polyploid
Embryo 22.B2	B	Chr12	25490	178	26028	24	202	0.881188	0.118812	1	1.48548e-30	-	sig	Multipolar	chaotic aneuploid	triploid or polyploid
Embryo 22.B2	B	Chr13	25490	121	26028	18	139	0.870504	0.129496	1	3.11759e-20	-	sig	Multipolar	chaotic aneuploid	triploid or polyploid
Embryo 22.B2	B	Chr14	25490	483	26028	65	548	0.881387	0.118613	1	3.05655e-80	-	sig	Multipolar	chaotic aneuploid	triploid or polyploid
Embryo 22.B2	B	Chr15	25490	128	26028	195	323	0.396285	0.603715	0.000114644	0.999927	-	-	Multipolar	chaotic aneuploid	triploid or polyploid
Embryo 22.B2	B	Chr16	25490	140	26028	28	168	0.833333	0.166667	1	2.04737e-19	-	sig	Multipolar	chaotic aneuploid	triploid or polyploid
Embryo 22.B2	B	Chr17	25490	20	26028	95	115	0.173913	0.826087	3.52536e-13	1	sig	-	Multipolar	chaotic aneuploid	triploid or polyploid
Embryo 22.B2	B	Chr18	25490	65	26028	8	73	0.890411	0.109589	1	1.61549e-12	-	sig	Multipolar	chaotic aneuploid	triploid or polyploid
Embryo 22.B2	B	Chr19	25490	9	26028	40	49	0.183673	0.816327	4.63177e-06	0.999999	sig	-	Multipolar	chaotic aneuploid	triploid or polyploid
[truncated: 3,831 more rows]
